# Supplementary material for: Single cell analysis reveals multiple requirements for zinc in the mammalian cell cycle
Source: eLife. 2020 Feb 4;9:e51107. doi: 10.7554/eLife.51107 (PMC7000218; doi:10.7554/eLife.51107)
Supplement: Figure 1—figure supplement 1—source data 1. [file elife-51107-fig1-figsupp1-data1.xlsx]

## Sheet: Sheet1
		ICP Data: PBB in media/10 fold dilution corrected
	MM	Na	Mg	Al	K	Ca	P	S	Mn	Fe	Co	Ni	Cu	Zn
	Rep1	3.47496e+06	16260.7	277.437	160058	45097.5	30850.9	47667.2	0.853934	94.815	26.4209	0.922847	23.1188	151.171
	Rep2	3.4595e+06	16381.1	294.955	158624	40176.8	31099.6	50450.2	1.02293	99.2299	24.9936	0.895552	22.6357	146.54
	Rep3	3.37122e+06	16352.8	297.579	158091	42342.1	30621	49641.6	0.72517	86.935	23.8281	0.988217	20.8012	134.042
	Rep4	3.39552e+06	16110	261.779	157784	43015.9	30273.4	49284.3	0.84723	89.1192	25.0153	1.36851	22.3392	139.544
	MM+ Chelex
	Rep1	3.30561e+06	15573.5	274.3	152697	38907.7	29684	47317.9	0.765609	84.9652	24.1472	0.623099	19.1508	87.1661
	Rep2	3.34612e+06	15862.7	301.23	155940	38231.6	30128.9	48902.7	0.918668	86.199	25.067	0.765768	19.6525	94.8464
	Rep3	3.60501e+06	17085.2	298.231	167460	41111	31942.1	49508.5	1.06789	97.7908	26.439	0.626932	21.2439	101.526
	Rep4	3.39159e+06	16151	260.221	159218	39970.4	30376.9	49861.1	0.880871	89.4113	25.159	0.842506	20.006	97.8728
