# Supplementary material for: Single cell analysis reveals multiple requirements for zinc in the mammalian cell cycle
Source: eLife. 2020 Feb 4;9:e51107. doi: 10.7554/eLife.51107 (PMC7000218; doi:10.7554/eLife.51107)
Supplement: Figure 1—figure supplement 3—source data 1. [file elife-51107-fig1-figsupp3-data1.xlsx]

## Sheet: Sheet1
		AVG % dead	Rep 1	Rep2	Rep 3		SEM
	10 uM TPEN	93.6667	94	98	89		2.60342
	3 uM TPEN	78.6667	83	78	75		2.33333
	10 uM TPA	77.3333	74	85	73		3.84419
	5 uM TPA	63.6667	63	73	55		5.20683
	3 uM TPA (ZD)	16	15	17	16		0.57735
	2 uM TPA (ZD)	1.33333	2	2	0		0.666667
	MM	3	2	3	4		0.57735
	ZR	2.33333	1	3	3		0.666667
