# Supplementary material for: Single cell analysis reveals multiple requirements for zinc in the mammalian cell cycle
Source: eLife. 2020 Feb 4;9:e51107. doi: 10.7554/eLife.51107 (PMC7000218; doi:10.7554/eLife.51107)
Supplement: Figure 1—source data 1. [file elife-51107-fig1-data1.xlsx]

## Sheet: Sheet1
RESTING FRET VALUES
ZD	MM	ZR
4.50883	4.44023	5.14378
4.50883	4.44023	5.14378
4.33321	4.31814	4.74688
4.33321	4.30964	4.74688
4.25676	4.30964	4.5974
4.25676	4.58179	4.5974
3.90906	4.58179	4.53203
3.90906	4.32897	4.53203
4.32211	4.32897	5.16204
4.32211	4.63955	4.43752
4.13599	4.63955	4.93047
4.13599	4.60572	4.93047
4.19251	4.60572	4.68913
4.19251	4.49296	4.75853
4.21007	4.49296	4.75853
4.21007	4.65638	4.95097
4.24212	4.65638	4.95097
4.24212	4.1193	4.29082
4.14572	4.1193	4.29082
4.14572	4.54578	4.21507
4.20384	4.54578	4.21507
4.20384	4.53109	5.06502
4.18628	4.53109	5.06502
4.18628	4.58506	4.4949
3.73533	4.58506	4.4949
3.73533	4.405	5.09749
4.33567	4.405	5.09749
4.08167	4.36021	4.9043
4.08167	4.36021	4.93295
4.16003	4.49875	5.16971
4.16003	4.49875	4.74132
3.98367	4.58141	4.74132
3.98367	4.58141	4.62413
4.19251	4.63869	4.62413
4.19251	4.63869	4.77894
4.57419	4.53672	4.77894
4.57419	4.53672	4.86674
4.39103	4.64989	4.86674
4.39103	4.33464	4.65196
4.31369	4.33464	4.65196
4.31369	4.34457	4.85317
4.49926	4.34457	4.85317
4.33272	4.62622	4.98736
4.33272	4.62622	4.98736
3.93305	4.49636	4.61185
3.93305	4.42942	4.49956
4.05486	4.42942	4.49956
4.05486	4.54533	4.91236
4.52777	4.54533	4.91236
4.52777	4.40049	4.7717
4.35485	4.40049	4.7717
4.35485	4.45114	4.78201
4.36701	4.45114	4.78201
4.36701	4.39198	4.34116
3.83909	4.39198	4.34116
3.8499	4.38205	4.66434
4.43	4.38205	4.66434
4.43	4.35782	4.53535
4.09702	4.35782	4.53535
3.96732	4.58047	4.65833
3.96732	4.58047	4.65833
4.2395	4.67327	4.48819
4.2395	4.67327	4.51096
4.23881	4.56067	4.51096
4.23881	4.56067	4.45807
4.32305	4.40755	4.45807
4.32305	4.40755	4.70403
3.60257	4.32851	4.70403
3.60257	4.32851	4.7175
3.81009	4.41342	4.7175
3.81009	4.41342	4.51869
3.72512	4.3955	4.72029
3.72512	4.3955	4.72029
3.72479	4.34072	4.4177
4.15106	4.16153	4.62517
4.15106	4.16153	4.62517
4.14498	4.60543	4.72391
4.23732	4.60543	4.72391
4.23732	4.3825	5.03922
4.3002	4.3825	5.03922
4.3002	4.45466	4.87974
4.26652	4.45466	4.87974
4.26652	4.54714	4.5976
3.80378	4.54714	4.5976
3.80378	4.0612	4.58679
4.20037	4.0612	4.58679
4.20037	4.5876	4.63736
4.07977	4.5876	4.63736
4.07977	4.76575	4.78918
3.70311	4.76575	4.78918
3.21754	4.27406	4.45606
3.8642	4.27406	4.45606
3.8642	4.53833	4.73526
4.21464	4.53833	4.73526
4.21464	4.59444	4.33918
4.45169	4.59444	4.33918
4.45169	4.50135	4.39736
4.11959	4.50135	4.39736
4.06733	4.81239	4.78742
3.75745	4.81239	4.78742
4.20749	4.6588	4.76704
4.20749	4.6588	4.76704
4.17607	4.80703	4.9851
	4.80703	4.9851
	4.62557	4.72473
	4.62557	4.72473
	4.43899	5.2125
	4.43899	5.2125
	4.70109	5.39175
	4.70109	5.39175
	4.79813	4.56825
	4.79813	4.56825
	4.55481	4.92509
	4.55481	4.92509
	4.99505	4.66816
	4.99505	4.66816
	4.41418	4.83924
	4.41418	4.83924
	4.54131	4.83644
	4.54131	4.83644
	4.56025	4.97271
	4.56025	4.97271
	4.48038	5.48942
	4.53468	4.49893
	4.53468	4.74017
	4.62832	4.74017
	4.62832	4.82483
	4.40739	4.97491
	4.40739	4.97491
	4.35654	4.60465
	4.35654	4.60465
	4.51387	4.6634
	4.51387	4.80166
	4.37161	4.80166
	4.37161	4.50873
	4.53631	4.50873
	4.53631	4.58511
	4.76721	4.58511
	4.76721	4.57715
	4.61891	4.57715
	4.61891	4.52898
	4.40098	4.52898
	4.40098	5.01604
	4.43288	5.01604
	4.43288	4.86174
	4.52018	4.86174
	4.52018	4.6316
	4.58315	4.6316
	4.58315	4.63065
	4.57451	4.63065
	4.57451	4.49598
	4.32376	4.49598
	4.65512	4.59963
	4.65512	4.59963
	4.51125	4.74811
	4.51125	4.74811
	4.37357	5.11147
	4.37357	5.11147
	4.42326	4.62726
	4.42326	4.62726
	4.34978	4.60843
	4.44388	4.60843
	4.44388	4.79073
	4.25595	4.79073
	4.25595	5.10666
	4.74859	5.10666
	4.74859	4.38352
	4.34347	4.7991
	4.34347	4.7991
	4.48861	4.62933
	4.48861	4.62933
	4.35955	4.85257
	4.35955	4.85257
	4.56094	4.62368
	4.56094	4.62368
	4.64765	4.28175
	4.64765	4.28175
	4.68723	4.93848
	4.68723	4.93848
	4.45334	4.77259
	4.45334	4.84183
	4.66837	4.84183
	4.66837	4.63013
	4.58751	4.63631
	4.58751	4.67529
	4.4142	4.67529
	4.4142	4.70507
	4.52289	4.70507
	4.52289	4.60673
	4.25403	4.60673
	4.25403	4.60416
	4.58189	4.60416
	4.58189	4.39639
	3.90981	4.39639
	3.90981	4.54252
	4.4992	4.54252
	4.4992	4.61138
	4.33245	4.61138
	4.33245	4.60859
	4.45694	4.60859
	4.45694	4.42227
	4.49284	4.42227
	4.49284	5.00099
	4.66217	5.00099
	4.66217	4.81774
	4.21251	4.81774
	4.21251	4.64496
	4.40882	4.64496
	4.40882	4.17587
	4.6623	4.17587
	4.6623	4.77112
	4.39175	4.62064
	4.39175	4.62064
	4.53272	4.55088
	4.53272	4.55088
	4.48603	4.85474
	4.48603	4.85474
	4.50021	4.84032
	4.50021	4.84032
	4.75476	4.63394
	4.75476	4.63394
	4.43594	4.49249
	4.43594	4.49249
	4.50429	4.89168
	4.50429	4.89168
	4.42878	4.94157
	4.42878	4.94157
	4.58906	4.58728
	4.58906	4.58728
	4.41312	4.52414
	4.41312	4.52414
	4.27682	4.8543
	4.27682	4.8543
	4.49949	5.31421
	4.49949	5.31421
	4.44494	4.92075
	4.44494	4.92075
	4.24576	4.6567
	4.24576	4.6567
	4.36804	4.91498
	4.36804	4.91498
	4.53947	4.71157
	4.53947	4.71157
	4.53819	4.61796
	4.53819	4.61796
	4.54548	4.49704
	4.65312	4.49704
	4.65312	4.76636
	4.61384	4.76636
	4.61384	4.93527
	4.48184	4.93527
	4.48184	4.64191
	4.42133	4.64191
	4.42133	4.81658
	4.54542	4.81658
	4.54542	5.07624
	4.60736	5.07624
	4.60736	4.16349
	4.77262	4.16349
	4.77262	4.50557
	4.24638	4.50557
	4.24638	4.80638
	4.49593	4.80638
	4.49593	4.80043
	4.32973	4.80043
	4.32973	4.88158
	4.47389	4.88158
	4.47389	4.72778
	4.57076	4.72778
	4.57076	5.5833
	4.42304	5.5833
	4.42304	4.49355
	4.4395	4.49355
	4.4395	4.5326
	4.08873	4.5326
	4.08873	4.54381
	4.58518	4.43277
	4.58518	4.43277
	4.62793	4.87995
	4.62793	4.87995
	4.3674	4.97828
	4.3674	4.97828
	4.77641	4.71514
	4.77641	4.71514
	4.37616	4.88032
	4.37616	4.74431
	4.28633	4.74431
	4.28633	4.7192
	4.4521	4.7192
	4.4521	4.38536
	4.39526	4.38536
	4.39526	5.00281
	4.56331	5.00281
	4.56331	4.99622
	4.08224	4.49379
	4.08224	4.49379
	4.51615	4.85135
	4.42686	4.52855
	4.42686	4.52855
	4.84588	4.55546
	4.84588	4.55546
	4.37907	4.06251
	4.37907	4.06251
	4.58901	4.61029
	4.58901	4.61029
	4.47362	4.5473
	4.47362	4.5473
	4.4515	4.60875
	4.4515	4.80915
	4.46382	4.80915
	4.46382	4.71604
	4.46991	4.71604
	4.46991	4.54301
	4.35129	4.54301
	4.35129	4.46892
	3.93208	4.59911
	3.93208	4.59911
	4.75092	4.58807
	4.75092	4.58807
	4.49885	4.70286
	4.49885	4.70286
	4.44321	4.79911
	4.44321	4.79911
	4.47624	4.92691
	4.47624	4.92691
	4.47483	4.91631
	4.47483	4.91631
	4.36949	4.9678
	4.36949	4.9678
	4.63958	4.88643
	4.63958	4.88643
	4.53577	4.81685
	4.53577	4.81685
	4.42963	4.742
	4.42963	4.742
	4.6763	4.91752
	4.6763	4.91752
	4.73218	4.91435
	4.73218	4.91435
	4.36135	4.44331
	4.36135	4.44331
	4.52336	4.89716
	4.52336	4.89716
	4.75679	4.53399
	4.75679	4.53399
	4.56043	4.94555
	4.56043	4.94555
	4.42053	4.67508
	4.36292	4.67508
	4.36292	4.80505
	4.56863	4.80505
	4.56863	4.98918
	4.5021	4.98918
	4.5021	5.08621
	4.80685	5.08621
	4.80685	5.09595
	4.69682	5.09595
	4.69682	4.5991
	4.61605	4.5991
	4.61605	4.45106
	4.32202	4.45106
	4.32202	4.79106
	4.78264	4.79106
	4.78264	4.90995
	4.51032	4.90995
	4.4208	4.8305
	4.4208	4.8305
	4.69567	4.73568
	4.69567	4.73568
	4.39154	4.85997
	4.39154	4.85997
	4.52435	4.70228
	4.52435	4.70228
	4.46368	5.10943
	4.46368	4.58382
	4.80461	4.58382
	4.80461	4.60459
	4.57592	4.60459
	4.57592	4.58079
	4.39832	4.58079
	4.39832	4.33568
	4.34481	4.33568
	4.34481	4.81379
		4.81379
		4.68829
		4.68829
		4.53767
		4.53767
		4.699
		4.699
		4.53233
		4.53233
		4.70729
		4.70729
		4.71121
		4.71121
		4.65318
		4.65318
		4.79291
		4.79291
		4.66495
		4.66495
		4.59433
		4.59433
		4.77461
		4.77461
