# Supplementary material for: Single cell analysis reveals multiple requirements for zinc in the mammalian cell cycle
Source: eLife. 2020 Feb 4;9:e51107. doi: 10.7554/eLife.51107 (PMC7000218; doi:10.7554/eLife.51107)
Supplement: Figure 2—figure supplement 1—source data 1. [file elife-51107-fig2-figsupp1-data1.xlsx]

## Sheet: Sheet1
	ICP data: PPB normalized to cell count
ZD: 3uM TPA	Na	Mg	Al	K	Ca	P	S	Mn	Fe	Co	Ni	Cu	Zn
Rep1	0.0138993	0.000293848	4.13658e-06	0.00274235	5.88526e-05	0.00638468	0.00257258	1.08252e-06	4.95639e-06	9.53368e-09	5.6815e-08	1.26925e-06	2.81801e-05
Rep2	0.0127988	0.00037522	4.0443e-06	0.00415476	8.24524e-05	0.00688946	0.00291866	1.33411e-06	5.60621e-06	1.08178e-08	7.20772e-08	1.41816e-06	2.90782e-05
Rep3	0.0137296	0.00032258	4.45587e-06	0.00339956	5.96506e-05	0.00642759	0.00268793	1.27422e-06	5.31856e-06	8.45838e-09	5.43702e-08	1.09044e-06	2.90187e-05
Rep4	0.0122522	0.0003632	4.27794e-06	0.00409067	0.000120251	0.00657582	0.00273742	1.30545e-06	5.73735e-06	8.79505e-09	5.45057e-08	1.25863e-06	2.92694e-05
ZD: 2uM TPA
Rep1	0.0110023	0.000325631	4.1211e-06	0.00312617	5.12611e-05	0.00590214	0.00246345	8.29338e-07	4.27176e-06	1.01292e-08	4.10476e-08	1.92083e-06	4.14183e-05
Rep2	0.0124654	0.000441231	4.20895e-06	0.00424315	4.50673e-05	0.00730328	0.00308039	1.12297e-06	5.55031e-06	1.05812e-08	5.98924e-08	2.38843e-06	4.91062e-05
Rep3	0.0131776	0.000344228	4.57966e-06	0.00325492	5.62634e-05	0.00634958	0.00264481	8.81547e-07	5.17365e-06	1.01807e-08	4.86899e-08	2.06282e-06	4.51178e-05
Rep4	0.0143363	0.000235981	5.57515e-06	0.00182583	5.97476e-05	0.00563517	0.00237396	7.16953e-07	3.99884e-06	9.80291e-09	4.405e-08	1.77698e-06	3.83345e-05
MM
Rep1	0.0126038	0.000207447	3.77954e-06	0.00168152	4.9606e-05	0.00525877	0.00216419	6.78471e-07	1.1249e-05	8.40735e-09	8.4758e-08	2.68534e-06	9.62491e-05
Rep2	0.0131167	0.000230248	3.91771e-06	0.00196826	4.80757e-05	0.00576726	0.00236083	7.52987e-07	1.11688e-05	8.4811e-09	3.35824e-08	2.93154e-06	0.000107691
Rep3	0.0113884	0.000235163	4.10251e-06	0.00209832	6.44118e-05	0.00539738	0.00227829	7.35824e-07	1.11953e-05	9.73129e-09	2.97471e-08	2.75197e-06	0.000100928
Rep4	0.0159992	0.000220833	5.10237e-06	0.00213932	7.03548e-05	0.00558875	0.00220116	7.19239e-07	1.08346e-05	1.14757e-08	6.60614e-08	2.51752e-06	9.79647e-05
