# Supplementary material for: Single cell analysis reveals multiple requirements for zinc in the mammalian cell cycle
Source: eLife. 2020 Feb 4;9:e51107. doi: 10.7554/eLife.51107 (PMC7000218; doi:10.7554/eLife.51107)
Supplement: Figure 3—source data 1. [file elife-51107-fig3-data1.xlsx]

## Sheet: MM
Source data for figure 3B - CDK2 ratios for each track throughout the movie. MM Condition
Track# is a relative index assigned to each track in the dataset. Each frame is spaced 12 mins apart.
	Frame	Frame	Frame	Frame	Frame	Frame	Frame	Frame	Frame	Frame	Frame	Frame	Frame	Frame	Frame	Frame	Frame	Frame	Frame	Frame	Frame	Frame	Frame	Frame	Frame	Frame	Frame	Frame	Frame	Frame	Frame	Frame	Frame	Frame	Frame	Frame	Frame	Frame	Frame	Frame	Frame	Frame	Frame	Frame	Frame	Frame	Frame	Frame	Frame
Track#	1	2	3	4	5	6	7	8	9	10	11	12	13	14	15	16	17	18	19	20	21	22	23	24	25	26	27	28	29	30	31	32	33	34	35	36	37	38	39	40	41	42	43	44	45	46	47	48	49
1	0.540321	0.516036	0.521377	0.480195	0.456457	0.467702	0.457778	0.449134	0.45982	0.460261	0.480133	0.509564	0.532121	0.549011	0.55593	0.557444	0.55331	0.588599	0.604481	0.626753	0.657114	0.724655	0.764689	0.809464	0.850072	0.893879	0.83588	0.890016	1.08582	1.05279	1.17071	1.16499	1.09663	1.02834	1.13916	1.08238	1.12266	1.12138	1.1533	1.08842	1.0827	1.0764	1.13844	1.04066	1.11777	1.0423	1.14197	0.994176	1.00099
2	0.616659	0.792385	0.823136	0.851503	0.854187	0.854542	0.861276	0.904195	0.936158	0.946407	0.94504	0.946109	0.941957	0.953304	0.955453	0.994506	1.00218	1.02047	1.05869	1.05534	1.10514	1.152	1.29846	1.32977	1.35127	1.36959	1.37996	1.39099	1.3967	1.44422	1.42474	1.39318	1.47632	1.40839	1.31395	1.36568	1.39457	1.40975	1.39944	1.44356	1.37314	1.36639	1.28773	1.28132	1.2911	1.17188	1.10114	1.04487	1.00976
3	0.378998	0.3758	0.354667	0.340681	0.343401	0.352061	0.351253	0.343007	0.354606	0.380243	0.382619	0.365276	0.350019	0.348465	0.334242	0.320823	0.30199	0.313167	0.312473	0.316112	0.321245	0.333958	0.330521	0.322014	0.333661	0.339373	0.340023	0.311597	0.30958	0.31466	0.317458	0.342401	0.342197	0.326155	0.309274	0.362939	0.393423	0.360719	0.349134	0.341004	0.37203	0.404618	0.37945	0.434182	0.531702	0.560176	0.548443	0.518039	0.504598
4	0.470399	0.480453	0.444856	0.428506	0.406329	0.415898	0.416478	0.426362	0.419139	0.420037	0.425766	0.401529	0.420097	0.395968	0.429931	0.449076	0.473906	0.505032	0.529263	0.593439	0.608784	0.616846	0.678846	0.67234	0.673409	0.653604	0.666335	0.698381	0.696279	0.702025	0.69078	0.773431	0.779952	0.814261	0.81741	0.870316	0.923089	0.956959	1.03657	1.06506	1.01833	1.09979	1.13028	1.12442	1.16247	0.978306	1.07135	1.14552	1.23623
5	0.378998	0.3758	0.354667	0.340681	0.343401	0.352061	0.351253	0.343007	0.354606	0.380243	0.382619	0.365276	0.350019	0.348465	0.334242	0.320823	0.30199	0.313167	0.312473	0.316112	0.321245	0.333958	0.330521	0.322014	0.333661	0.339373	0.340023	0.311597	0.30958	0.31466	0.317458	0.342401	0.342197	0.326155	0.309274	0.362939	0.393423	0.360719	0.349134	0.341004	0.37203	0.404618	0.37945	0.434182	0.531702	0.560176	0.548443	0.518039	0.504598
6	0.585884	0.608394	0.618923	0.639207	0.594655	0.645062	0.651308	0.685278	0.749646	0.773895	0.889387	0.818816	0.81765	0.814048	0.871509	0.901818	0.887417	0.903647	0.958125	0.897297	0.893008	0.927553	1.03919	1.13942	1.08204	1.03863	1.18276	1.19279	0.930386	0.990134	0.88306	0.883293	0.941168	0.973802	1.02551	1.21089	1.00888	1.19016	1.36337	1.0976	0.848104	0.975059	1.10532	1.09641	1.3186	1.17279	1.17951	1.1552	1.14395
7	0.41646	0.438539		0.458742	0.454829	0.450186	0.415447	0.427147	0.443265	0.42186	0.408919	0.403263	0.39706	0.428769	0.367514	0.366305	0.356775	0.345868	0.338787	0.344875	0.332054	0.344024	0.369782	0.372488	0.385854	0.402902	0.367061	0.432021	0.494856	0.470885	0.508109	0.534431	0.529827	0.525663	0.567263	0.681841	0.701458	0.711487	0.730096		0.892544	0.929328	1.01514	1.05058	0.9761	0.935643	0.931978	1.00381	0.793501
8	0.540321	0.516036	0.521377	0.480195	0.456457	0.467702	0.457778	0.449134	0.45982	0.460261	0.480133	0.509564	0.532121	0.549011	0.55593	0.557444	0.55331	0.588599	0.604481	0.626753	0.657114	0.724655	0.764689	0.809464	0.850072	0.893879	0.83588	0.890016	1.08582	1.05279	1.17071	1.16499	1.09663	1.02834	1.13916	1.08238	1.12266	1.12138	1.1533	1.08842	1.0827	1.0764	1.13844	1.04066	1.11777	1.0423	1.14197	0.994176	1.00099
9	0.41646	0.438539		0.458742	0.454829	0.450186	0.415447	0.427147	0.443265	0.42186	0.408919	0.403263	0.39706	0.428769	0.367514	0.366305	0.356775	0.345868	0.338787	0.344875	0.332054	0.344024	0.369782	0.372488	0.385854	0.402902	0.367061	0.432021	0.494856	0.470885	0.508109	0.534431	0.529827	0.525663	0.567263	0.681841	0.701458	0.711487	0.730096		0.892544	0.929328	1.01514	1.05058	0.9761	0.935643	0.931978	1.00381	0.793501
10	0.949407	0.993936	0.964806	1.07587	1.05041	1.09187	1.04414	1.01671	1.0446	1.03514	1.08305	1.08444	1.11999	1.09886	1.14589	1.13839	1.18432	1.14241	1.16519	1.07493	1.17342	1.18628	1.25258	1.28783	1.20866	1.19971	1.12493	1.13382	1.1991	1.23309	1.25699	1.30139	1.28186	1.26173	1.19468	1.18214	1.19235	1.21109	1.28404	1.36297	1.35029	1.36992	1.36963	1.18929	0.891672	0.976397	1.27933	1.47656	1.50979
11	1.14055	1.08305	1.05826	1.07724	1.2023	1.17448	1.04188	1.05261	1.01512	0.965526	0.886118	0.922224	0.926607	0.971546	0.978005	1.07457	0.997839	0.964874	0.967601	0.974837	0.90433	0.914998	0.889425	0.971012	0.927813	0.991611	1.1352	1.23154	1.18114	1.11188	1.09911	1.20568	1.14363	1.19794	1.13205	1.13486	1.20364	1.23958	1.20421	1.22052	1.3393	1.38868	1.55731	1.52637	1.41636	1.40769	1.4612	1.43901	1.28012
12	1.12135	1.14207	1.15034	1.0994	1.03388	1.07996	1.18828	1.17938	1.10812	1.20924	1.25303	1.22995	1.16407	1.21923	1.28067	1.341	1.27361	1.24708	1.26349	1.18479	1.22484	1.33158	1.18239	1.30125	1.35202	1.24496	1.29953	1.21913	1.28199	1.37279	1.36951	1.38877	1.21107	1.42102	1.48623	1.39518	1.2794	1.31827	1.41603	1.50221	1.63948	1.61624	1.52195	1.32202	1.13525	0.536344	0.477305	0.625424	0.402444
13	1.1619	1.20085	1.29132	1.29976	1.27146	1.10885	1.20715	1.22072	0.944511	0.916712	0.970959	1.15683	1.17407	1.11226	1.20653	1.29346	1.27415	1.2607	1.35312	1.28921	1.35209	1.24168	1.22767	1.16104	1.1213	1.08498	1.24416	1.289	1.37186	1.37156	1.48777	1.51267	1.57774	1.468	1.30888	1.34397	1.31186	1.3233	1.40321	1.43166	1.32973	1.20815	1.14544	1.31316	0.603232	0.521078	0.499195	0.58285	0.699968
14	0.538112	0.542385	0.531987	0.542354	0.53691	0.517907	0.499051	0.514681	0.500559	0.497298	0.513132	0.525508	0.554793	0.540495	0.512558	0.516573	0.480627	0.464916	0.428237	0.402927	0.414619	0.398784	0.395534	0.389446	0.36457	0.368163	0.398342	0.384669	0.34947	0.35738	0.403452	0.384221	0.399574	0.403985	0.431144	0.434675	0.445857	0.455456	0.438912	0.436827	0.451744	0.388219	0.397968	0.449529	0.483176	0.471029	0.456518	0.440217	0.45126
15	1.01061	0.967988	1.08078	0.984822	1.07361	1.09196	1.09567	1.05863	1.00846	1.0561	1.00108	1.03266	1.05289	1.11032	1.14415	1.08185	1.06686	1.06618	1.18223	1.14087	1.20192	1.18982	1.09518	1.12491	1.14524	1.17465	1.23978	1.26038	1.28615	1.18345	1.26308	1.33983	1.30731	1.33289	1.29156	1.25126	1.26073	1.23217	1.1999	1.28584	1.30235	1.3599	1.43104	1.48024	1.4892	1.52073	1.57808	1.58602	1.50624
16	1.14015	1.14546	1.26898	1.27884	1.34498	1.24942	1.18971	1.26857	1.26914	1.23022	1.18762	1.18073	1.05553	0.95298	1.01605	1.06954	0.991504	0.982801	0.97187	1.03122	1.0893	1.16983	1.10556	1.09064	0.960552	0.957033	0.916364	0.992434	1.02375	0.992383	1.05052	1.09373	1.12307	1.07053	1.07828	1.02702	0.947723	1.03808	0.965089	1.10961	1.29941	1.27291	1.2918	1.25475	1.29918	1.31415	1.35493	1.28272	1.13785
17	1.28368	1.3253	1.34498	1.33631	1.38754	1.33346	1.34447	1.3885	1.35066	1.25258	1.27798	1.34819	1.28319	1.30314	1.36092	1.30571	1.13809	1.22157	1.21014	1.13624	1.27056	1.29567	1.16668	1.23511	1.31321	1.37916	1.40911	1.42412	1.3897	1.43291	1.45285	1.42179	1.48843	1.45941	1.51695	1.51934	1.55714	1.50945	1.48227	1.48866	1.48923	1.46965	1.42	1.4135	1.37876	1.43325	1.39918	0.622064	0.417015
18	1.12135	1.14207	1.15034	1.0994	1.03388	1.07996	1.18828	1.17938	1.10812	1.20924	1.25303	1.22995	1.16407	1.21923	1.28067	1.341	1.27361	1.24708	1.26349	1.18479	1.22484	1.33158	1.18239	1.30125	1.35202	1.24496	1.29953	1.21913	1.28199	1.37279	1.36951	1.38877	1.21107	1.42102	1.48623	1.39518	1.2794	1.31827	1.41603	1.50221	1.63948	1.61624	1.52195	1.32202	1.13525	0.536344	0.477305	0.652642	0.69318
19	0.616659	0.792385	0.823136	0.851503	0.854187	0.854542	0.861276	0.904195	0.936158	0.946407	0.94504	0.946109	0.941957	0.953304	0.955453	0.994506	1.00218	1.02047	1.05869	1.05534	1.10514	1.152	1.29846	1.32977	1.35127	1.36959	1.37996	1.39099	1.3967	1.44422	1.42474	1.39318	1.47632	1.40839	1.31395	1.36568	1.39457	1.40975	1.39944	1.44356	1.37314	1.36639	1.28773	1.28132	1.2911	1.17188	1.10114	1.04487	1.00976
20	0.371197	0.372635	0.357648	0.339674	0.349854	0.33549	0.332764	0.33063	0.344292	0.321547	0.337297	0.336644	0.323706	0.322827	0.327191	0.329829	0.324819	0.314356	0.313075	0.326819	0.329544	0.355415	0.348974	0.371718	0.399626	0.445503	0.526023	0.535097	0.599514	0.625686	0.664623	0.709744	0.772994	0.820698	0.867127	0.939273	0.964839	1.04479	0.956202	1.11624	1.12823	1.23254	1.02347	1.12236	1.04384	0.830267	0.87869	0.910638	0.949702
21	1.17199	1.21304	1.20987	1.40001	1.35074	1.18199	1.30664	1.33981	1.26581	1.24797	1.281	1.30326	1.39726	1.34668	1.24843	1.30265	1.37612	1.52361	1.50315	1.56089	1.50553	1.48635	1.52954	1.57896	1.65345	1.58488	1.51967	1.52882	1.55517	1.34969	1.23765	1.42433	1.43314	1.43718	1.41645	1.38409	1.27176	1.32621	1.27074	1.30592	1.33596	1.26238	1.43771	1.35103	1.24968	1.25352	1.1011	1.27498	1.43674
22	0.772347	0.806266	0.860764	0.874983	0.816544	0.803938	0.859234	0.910992	0.944474	0.992242	0.993258	1.00826	1.00718	0.977756	1.04563	1.03495	1.00836	1.01534	0.99078	1.05256	1.00552	0.979362	1.02066	0.912732	0.969332	0.938353	1.03226	1.01675	1.04731	1.03369	1.02042	1.07746	1.12746	1.08545	1.13955	1.13741	1.08788	1.0956	1.09843	1.17049	1.15011	1.23295	1.2337	1.22551	1.20426	1.35558	1.33583	1.36497	1.24968
23	0.9711	0.972338	1.06111	1.13606	1.16825	1.19772	1.14964	1.19886	1.13644	1.17122		1.40484	1.38822	1.41408	1.41109	1.39618	1.36758	1.44104	1.3373	1.31976	1.28526	1.27738	1.40647	1.37342	1.37489	1.39744	1.41272	1.40777	1.49778	1.43943	1.39865	1.41146	1.41815	1.45205	1.4425	1.4828	1.42679	1.31926	1.29177	1.29583	1.25381	1.16292	1.2011	1.20519	1.21187	1.15794	1.21446	1.12338	1.23671
24	0.371197	0.372635	0.357648	0.339674	0.349854	0.33549	0.332764	0.33063	0.344292	0.321547	0.337297	0.336644	0.323706	0.322827	0.327191	0.329829	0.324819	0.314356	0.313075	0.326819	0.329544	0.355415	0.348974	0.371718	0.399626	0.445503	0.526023	0.535097	0.599514	0.625686	0.664623	0.709744	0.772994	0.820698	0.867127	0.939273	0.964839	1.04479	0.956202	1.11624	1.12823	1.23254	1.02347	1.12236	1.04384	0.830267	0.87869	0.910638	0.949702
25	1.01061	0.967988	1.08078	0.984822	1.07361	1.09196	1.09567	1.05863	1.00846	1.0561	1.00108	1.03266	1.05289	1.11032	1.14415	1.08185	1.06686	1.06618	1.18223	1.14087	1.20192	1.18982	1.09518	1.12491	1.14524	1.17465	1.23978	1.26038	1.28615	1.18345	1.26308	1.33983	1.30731	1.33289	1.29156	1.25126	1.26073	1.23217	1.1999	1.28584	1.30235	1.3599	1.43104	1.48024	1.4892	1.52073	1.57808	1.58602	1.50624
26	1.28368	1.3253	1.34498	1.33631	1.38754	1.33346	1.34447	1.3885	1.35066	1.25258	1.27798	1.34819	1.28319	1.30314	1.36092	1.30571	1.13809	1.22157	1.21014	1.13624	1.27056	1.29567	1.16668	1.23511	1.31321	1.37916	1.40911	1.42412	1.3897	1.43291	1.45285	1.42179	1.48843	1.45941	1.51695	1.51934	1.55714	1.50945	1.48227	1.48866	1.48923	1.46965	1.42	1.4135	1.37876	1.43325	1.39918	0.622064	0.417015
27	0.782334	0.773389	0.786982	0.846781	0.900616	0.980099	1.00832	1.05681	1.01853	1.04565	1.04427	1.03889	1.11981	1.13369	0.993547	1.08522	1.03769	1.19357	1.1427	1.18314	1.17392	1.11297	1.1244	1.29274	1.36338	1.42431	1.32994	1.33306	1.36559	1.49398	1.34281	1.23252	1.20969	1.33169	1.40251	1.48525	1.37643	1.46286	1.36161	1.34807	1.34364	1.12488	1.19333	1.31947	1.39188	0.677104	0.732383	0.821087	0.840494
28	0.522696	0.529817	0.556979	0.581437	0.596774	0.638065	0.70885	0.742781	0.759597	0.86518	0.838792	0.855813	0.874178	0.905619	0.906399	0.919705	0.989613	1.00413	1.01043	0.993517	0.938736	0.883712	0.813646	0.846771	0.854729	0.848138	0.935875	0.922847	0.926653	0.960278	1.03232	1.03622	1.04467	1.06266	1.10973	1.05682	1.10431	1.04676	1.06868	1.10755	1.03517	1.08819	1.0594	1.13268	1.07159	1.00005	1.06612	1.19839	1.26513
29	0.470399	0.480453	0.444856	0.428506	0.406329	0.415898	0.416478	0.426362	0.419139	0.420037	0.425766	0.401529	0.420097	0.395968	0.429931	0.449076	0.473906	0.505032	0.529263	0.593439	0.608784	0.616846	0.678846	0.67234	0.673409	0.653604	0.666335	0.698381	0.696279	0.702025	0.69078	0.773431	0.779952	0.814261	0.81741	0.870316	0.923089	0.956959	1.03657	1.06506	1.01833	1.09979	1.13028	1.12442	1.16247	0.978306	1.07135	1.14552	1.23623
30	0.483251	0.516621	0.513084	0.499218	0.513276	0.520895	0.460834	0.415056	0.421019	0.425431	0.430681	0.420079	0.42343	0.415696	0.418323	0.421335	0.431126	0.440734	0.425966	0.441446	0.468451	0.500112	0.53755	0.54271	0.544467	0.521945	0.53749	0.581155	0.611054	0.607111	0.670024	0.727886	0.851566	0.943734	1.01311	1.11508	1.07979	1.10628	1.06425	1.06174	1.12404	1.10279	1.06745	1.14945	1.30159	1.21701	1.2205	1.15884	1.15589
31	1.26024	1.39038	1.35859	1.29235	1.33834	1.32765	1.34844	1.31426	1.26436	1.25277	1.25264	1.31949	1.38826	1.50781	1.49873	1.43241	1.5036	1.45989	1.44083	1.33248	1.2358	1.22737	1.17542	1.15499	1.18361	1.13706	1.08995	1.18175	1.17123	1.20084	1.18318	1.21195	1.23908	1.25603	1.30164	1.4566	1.40763	1.26153	1.33067	1.32198	1.17833	1.34114	1.34605	1.43935	1.52372	1.29736	1.33511	1.463	1.48035
32	0.538112	0.542385	0.531987	0.542354	0.53691	0.517907	0.499051	0.514681	0.500559	0.497298	0.513132	0.525508	0.554793	0.540495	0.512558	0.516573	0.480627	0.464916	0.428237	0.402927	0.414619	0.398784	0.395534	0.389446	0.36457	0.368163	0.398342	0.384669	0.34947	0.35738	0.403452	0.384221	0.399574	0.403985	0.431144	0.434675	0.445857	0.455456	0.438912	0.436827	0.451744	0.388219	0.397968	0.449529	0.483176	0.471029	0.456518	0.440217	0.45126
33	0.546004	0.564975	0.636246	0.629179	0.635379	0.605054	0.672717	0.757428	0.705955	0.747511	0.819162	0.770889	0.847558	0.90248	0.833379	0.910721	0.898799	0.914235	1.04224	1.04916	1.02536	1.01856	1.04371	1.04844	1.04501	0.920904	0.946701	1.01871	1.01562	1.12844	1.06486	1.13095	1.10781	1.13199	1.04442	1.08815	1.07401	1.07083	1.09047	1.08702	1.11552	1.14034	1.14984	1.12606	1.15874	1.15072	1.17098	1.13178	1.17644
34	0.445011	0.423982	0.456091	0.446897	0.407398	0.421139	0.444646	0.457506	0.452094	0.44537	0.448976	0.451495	0.444078	0.435049	0.447472	0.414251	0.435911	0.431398	0.448411	0.454926	0.438062	0.449387	0.503801	0.632489	0.640159	0.687192	0.641463	0.68262	0.772218	0.826911	0.901592	0.928354	1.04525	1.01565	1.03277	1.07636	1.14806	1.21316	1.22466	1.30037	1.42404	1.28239	1.29167	1.24824	1.21699	1.17522	1.15579	1.17806	1.16061
35	1.14015	1.14546	1.26898	1.27884	1.34498	1.24942	1.18971	1.26857	1.26914	1.23022	1.18762	1.18073	1.05553	0.95298	1.01605	1.06954	0.991504	0.982801	0.97187	1.03122	1.0893	1.16983	1.10556	1.09064	0.960552	0.957033	0.916364	0.992434	1.02375	0.992383	1.05052	1.09373	1.12307	1.07053	1.07828	1.02702	0.947723	1.03808	0.965089	1.10961	1.29941	1.27291	1.2918	1.25475	1.29918	1.31415	1.35493	1.28272	1.13785
36	1.06095	1.08185	1.11841	1.09295	1.07264	1.01456	1.07268	1.08525	1.1567	1.13979	1.14645	1.12917	1.12187	1.14449	1.1715	1.17166	1.22489	1.24078	1.21043	1.22739	1.23363	1.24653	1.12637	1.25998	1.30259	1.32898	1.26436	1.26584	1.35157	1.32919	1.36193	1.31835	1.24241	1.37154	1.28509	1.19046	1.22098	1.31343	1.26742	1.29768	1.14773	1.17111	1.10609	1.22986	1.27826	1.192	1.26348	1.23229	1.26765
37	0.522696	0.529817	0.556979	0.581437	0.596774	0.638065	0.70885	0.742781	0.759597	0.86518	0.838792	0.855813	0.874178	0.905619	0.906399	0.919705	0.989613	1.00413	1.01043	0.993517	0.938736	0.883712	0.813646	0.846771	0.854729	0.848138	0.935875	0.922847	0.926653	0.960278	1.03232	1.03622	1.04467	1.06266	1.10973	1.05682	1.10431	1.04676	1.06868	1.10755	1.03517	1.08819	1.0594	1.13268	1.07159	1.00005	1.06612	1.19839	1.26513
38	0.442998	0.464536	0.47319	0.500437	0.493742	0.521501	0.512134	0.539594	0.55328	0.54099	0.557774	0.581412	0.616243	0.608595	0.670957	0.698181	0.726133	0.755725	0.778063	0.844597	0.879287	0.882715	0.931208	1.01059	1.07904	1.1468	1.12398	1.18593	1.17305	1.17481	1.25816	1.24742	1.26366	1.18837	1.10054	1.20377	1.14267	1.19896	1.20293	1.13506	1.12447	1.15241	1.14956	1.24614	1.26236	1.22622	1.16365	1.12805	1.09345
39	0.939016	0.979264	1.04628	1.1068	1.11198	1.13587	1.19317	1.16946	1.16088	1.16233	1.12695	1.20098	1.28105	1.25187	1.2671	1.25986	1.24125	1.28599	1.32056	1.33219	1.3077	1.31751	1.42337	1.39726	1.35398	1.39339	1.37431	1.4265	1.43549	1.41467	1.3931	1.45677	1.45212	1.39484	1.35887	1.32489	1.3776	1.3678	1.40529	1.41436	1.34675	1.30192	1.2536	1.27052	1.31724	1.35149	1.35693	1.44424	1.4891
40	0.883405	0.937128	0.903101	0.988114	1.06596	1.05375	1.05499	1.10412	1.10412	1.07865	1.13106	1.08513	1.14159	1.1573	1.14419	1.17692	1.14852	1.15165	1.229	1.22859	1.24938	1.26475	1.30503	1.31689	1.34784	1.33232	1.37303	1.3087	1.34399	1.27499	1.35123	1.38797	1.3244	1.25649	1.33912	1.33074	1.396	1.34354	1.399	1.38398	1.39099	1.38053	1.34834	1.35304	1.39532	1.36593	1.45714	1.49254	1.47786
41	0.735527	0.757961	0.766716	0.776122	0.863478	0.85608	0.799871	0.868617	0.894342	0.986498	1.07934	1.10411	1.18751	1.18064	1.21899	1.14744	1.17011	1.18233	1.19297	1.15777	1.18416	1.16034	1.16171	1.15569	1.09345	1.05396		1.06632	1.0891	1.11939	1.14009	1.12523	1.07724	1.10846	1.16269	1.09204	1.11783	1.13907	1.16854		1.18779	1.22756	1.24304	1.25751	1.29121		1.27802	1.41397	1.4026
42	0.745001	0.789137	0.838329	0.815449	0.821212	0.797498	0.843047	0.866186	0.977577	1.01913	1.05177	1.05705	1.04415	1.01529	0.966137	0.965919	0.957733	0.95375	0.976141	0.981504	0.990582	0.996974	0.980499	0.973263	0.890295	0.916651	0.882806	0.905122	0.906866	0.937983	0.941868	0.877671	0.976398	0.976455	1.03533	1.03967	1.07863	1.13434	1.15812	1.23868	1.224	1.11454	1.21563	1.2348	1.24692	1.20231	1.24686	1.24066	1.29181
43	1.08143	1.04649	1.0279	1.18134	1.27045	1.35115	1.39885	1.35353	1.34	1.34059	1.25464	1.14233	1.11792	1.05604	1.07068	1.15549	1.0271	1.24504	1.36729	1.14259	1.21472	1.31179	1.33253	1.38924	1.3343	0.96376	0.659651	0.536881	0.666135	0.464393	0.478861	0.456776	0.506991	0.458125	0.446138	0.49137	0.442819	0.471493	0.445771	0.494953	0.446714	0.543338	0.643993	0.613164	0.656931	0.676398	0.807908	0.842142	0.89325
44	1.2889	1.28086	1.37428	1.42414	1.3663	1.40298	1.40389	1.37721	1.40352	1.36525	1.40621	1.36113	1.34919	1.30882	1.24475	1.37908	1.44125	1.39006	1.39697	1.35165	1.42087	1.39515	1.4686	1.31606	1.34966	1.28455	1.22385	1.13442	1.1899	1.16961	1.19107	1.33336	1.43319	1.56581	1.42053	1.4747	1.45813	1.5341	1.52587	1.55223	1.42206	1.35887	1.42945	1.38287	1.35903	1.35132	1.28812	1.30574	1.23279
45	0.948492	0.952844	0.984448	0.965311	0.995688	1.04616	1.08401	1.0395	1.09817	1.10227	1.02338	1.00337	0.975909	1.02074	1.09875	1.07868	1.05383	1.10462	1.14432	1.14596	1.13621	1.15818	1.11751	1.18904	1.17426	1.21147	1.18506	1.18536	1.3212	1.33836	1.42792	1.47428	1.30708	1.41005	1.43644	1.43849	1.41991	1.46989	1.44212	1.44247	1.50605	1.42529	1.43905	1.45274	1.4489	1.39145	1.41514	1.4423	1.4646
46	0.576964	0.64262	0.647678	0.660697	0.626219	0.636143	0.623958	0.608894	0.565793	0.568638	0.559079	0.564935	0.500125	0.459115	0.441108	0.42943	0.394588	0.395666	0.355941	0.349928	0.333092	0.366079	0.345598	0.360129	0.349344	0.331122	0.355824	0.319927	0.311414	0.334145	0.335669	0.354724	0.422097	0.532423	0.578429	0.664067	0.679017	0.644677	0.671967	0.612631	0.520368	0.801343	0.727659	0.764946	0.896782	0.831065	0.827215	0.890358	0.877807
47	1.13747	1.0882	1.10983	1.1865	1.1982	1.18294	1.20261	1.15081	1.17863	1.15483	1.1319	1.10666	1.12439	1.13868	1.0664	1.0488	1.05652	1.11185	1.08713	1.06947	1.12883	1.11964	1.12788	1.13641	1.14308	1.14725	0.966717	1.11658	1.16668	1.19524	1.09181	1.16101	1.13103	1.29367	1.23264	1.25033	1.18623	1.27328	1.1959	1.03994	1.21762	1.20077	1.20743	1.26051	1.18449	1.13786	1.34763	1.24934	1.31102
48	0.448273	0.45105	0.473685	0.490439	0.493522	0.501898	0.530819	0.573859	0.629978	0.68374	0.753705	0.794163	0.780767	0.783036	0.789077	0.794463	0.821019	0.84636	0.897253	0.922394	0.976384	1.03704	1.10207	1.24963	1.22023	1.21065	1.21754	1.14874	1.19066	1.21575	1.18039	1.19817	1.21959	1.18192	1.19862	1.14415	1.19236	1.20629	1.22536	1.23186	1.26195	1.22906	1.23181	1.25247	1.26553	1.2958	1.36126	1.36659	1.3764
49	1.0786	1.08621	1.11213	1.08896	1.08458	1.14846	1.14278	1.19362	1.06641	1.13607	1.17107	1.16814	1.21961	1.14974	1.10382	1.1446	1.18328	1.17136	1.14966	1.18601	1.2999	1.26197	1.29648	1.28772	1.30384	1.27709	1.28353	1.32492	1.27326	1.26308	1.3212	1.29937	1.27021	1.23245	1.27264	1.26223	1.24484	1.27825	1.34348	1.40249	1.36192	1.3662	1.40913	1.37397	1.36697	1.38127	1.40117	1.40651	1.37061
50	0.952715	0.998705	1.00015	0.978358	1.07769	1.1786	1.215	1.22396	1.20891	1.25704	1.28213	1.27519	1.19386	1.17454	1.22289	1.20629	1.18276	1.09313	1.05089	1.12194	1.11607	1.21551	1.20005	1.18885	1.10118	1.2199	1.19743	1.05806	1.30472	1.32029	1.23454	1.2788	1.29572	1.25932	1.24636	1.23194	1.11091	1.21432	1.31077	1.25015	1.18817	1.19894	1.42382	1.24997	1.12584	1.2817	1.39641	1.39671	1.62348
51	1.31777	1.31345	1.32247	1.29681	1.33919	1.38974	1.37415	1.30733	1.29183	1.27054	1.26782	1.28223	1.21103	1.24956	1.29232	1.22558	1.28043	1.31479	1.32798	1.34963	1.35558	1.2907	1.33671	1.22257	1.27198	1.28112	1.35078	1.32625	1.32922	1.32455	1.39288	1.40012	1.3618	1.29324	1.30422	1.32975	1.28774	1.29287	1.30891	1.35746	1.33026	1.36201	1.34869	1.26742	1.24261	1.24957	1.32883	1.49706	1.22982
52	0.448273	0.45105	0.473685	0.490439	0.493522	0.501898	0.530819	0.573859	0.629978	0.68374	0.753705	0.794163	0.780767	0.783036	0.789077	0.794463	0.821019	0.84636	0.897253	0.922394	0.976384	1.03704	1.10207	1.24963	1.22023	1.21065	1.21754	1.14874	1.19066	1.21575	1.18039	1.19817	1.21959	1.18192	1.19862	1.14415	1.19236	1.20629	1.22536	1.23186	1.26195	1.22906	1.23181	1.25247	1.26553	1.2958	1.36126	1.36659	1.3764
53	1.32703	1.34777	1.32714	1.2939	1.21211	1.2235	1.23236	1.29221	1.31653	1.35931	1.31664	1.23471	1.17908	1.22144	1.35742	1.35536	1.36259	1.31105	1.30221	1.31266	1.28869	1.19737	1.21144	1.09839	1.21312	1.3451	1.26614	1.30414	1.22883	1.30303	1.28608	1.11732	1.29357	1.41687	1.41768	1.24692	1.10174	1.08266	1.11921	1.28408	1.24917	1.25093	1.20077	1.19605	1.10806	1.01678	0.617293	0.531242	0.679993
54	0.483251	0.516621	0.513084	0.499218	0.513276	0.520895	0.460834	0.415056	0.421019	0.425431	0.430681	0.420079	0.42343	0.415696	0.418323	0.421335	0.431126	0.440734	0.425966	0.441446	0.468451	0.500112	0.53755	0.54271	0.544467	0.521945	0.53749	0.581155	0.611054	0.607111	0.670024	0.727886	0.851566	0.943734	1.01311	1.11508	1.07979	1.10628	1.06425	1.06174	1.12404	1.10279	1.06745	1.14945	1.30159	1.21701	1.2205	1.15884	1.15589
55	1.31777	1.31345	1.32247	1.29681	1.33919	1.38974	1.37415	1.30733	1.29183	1.27054	1.26782	1.28223	1.21103	1.24956	1.29232	1.22558	1.28043	1.31479	1.32798	1.34963	1.35558	1.2907	1.33671	1.22257	1.27198	1.28112	1.35078	1.32625	1.32922	1.32455	1.39288	1.40012	1.3618	1.29324	1.30422	1.32975	1.28774	1.29287	1.30891	1.35746	1.33026	1.36201	1.34869	1.26742	1.24261	1.24957	1.32883	1.49706	1.22982
56	0.883405	0.937128	0.903101	0.988114	1.06596	1.05375	1.05499	1.10412	1.10412	1.07865	1.13106	1.08513	1.14159	1.1573	1.14419	1.17692	1.14852	1.15165	1.229	1.22859	1.24938	1.26475	1.30503	1.31689	1.34784	1.33232	1.37303	1.3087	1.34399	1.27499	1.35123	1.38797	1.3244	1.25649	1.33912	1.33074	1.396	1.34354	1.399	1.38398	1.39099	1.38053	1.34834	1.35304	1.39532	1.36593	1.45714	1.49254	1.47786
57	0.772347	0.806266	0.860764	0.874983	0.816544	0.803938	0.859234	0.910992	0.944474	0.992242	0.993258	1.00826	1.00718	0.977756	1.04563	1.03495	1.00836	1.01534	0.99078	1.05256	1.00552	0.979362	1.02066	0.912732	0.969332	0.938353	1.03226	1.01675	1.04731	1.03369	1.02042	1.07746	1.12746	1.08545	1.13955	1.13741	1.08788	1.0956	1.09843	1.17049	1.15011	1.23295	1.2337	1.22551	1.20426	1.35558	1.33583	1.36497	1.24968
58	1.22056	1.31397	1.27256	1.27207	1.30185	1.35148	1.279	1.29927	1.32189	1.27362	1.29646	1.27141	1.2974	1.2058	1.22001	1.20431	1.19955	1.24871	1.24157	1.28855	1.28444	1.3147	1.33564	1.36563	1.4276	1.34834	1.3771	1.43833	1.41294	1.50827	1.45859	1.396	1.34147	1.38182	1.36265	1.33543	1.30169	1.2774	1.24542	1.19924	1.12518	1.31293	1.49217	1.47038	1.44838	1.36246	1.33406	1.34517	1.38453
59	0.41801	0.428088	0.449569	0.417021	0.438413	0.429468	0.433003	0.398502	0.399451	0.423911	0.436645	0.430461	0.475492	0.534614	0.548068	0.663455	0.632628	0.706162	0.71893	0.6872	0.797329	0.770284	0.882018	0.858822	0.834538	1.00281	0.971716	0.898392	0.836941	0.947566	0.940266	1.03603	0.904526	0.905958	1.08737	1.15648	1.12603	1.11204	1.05313	1.0032	1.04692	1.02003	1.09467	1.09778	1.06702	0.979156	1.12188	1.07746	1.08981
60	1.0786	1.08621	1.11213	1.08896	1.08458	1.14846	1.14278	1.19362	1.06641	1.13607	1.17107	1.16814	1.21961	1.14974	1.10382	1.1446	1.18328	1.17136	1.14966	1.18601	1.2999	1.26197	1.29648	1.28772	1.30384	1.27709	1.28353	1.32492	1.27326	1.26308	1.3212	1.29937	1.27021	1.23245	1.27264	1.26223	1.24484	1.27825	1.34348	1.40249	1.36192	1.3662	1.40913	1.37397	1.36697	1.38127	1.40117	1.40651	1.37061
61	0.788005	0.800598	0.845176	0.866216	0.892501	0.894488	0.937233	0.951119	1.00566	1.11895	1.13104	1.1704	1.2271	1.27362	1.28849	1.27672	1.47027	1.39633	1.41366	1.3702	1.37306	1.33307	1.26292	1.2602	1.23978	1.24601	1.29313	1.25699	1.25154	1.25717	1.31638	1.3664	1.3865	1.32478	1.38875	1.37244	1.51975	1.47996	1.45844	1.46888	1.43878	1.35684	1.29576	1.36111	1.41065	1.46591	1.51762	1.62625	1.57867
62	1.22056	1.31397	1.27256	1.27207	1.30185	1.35148	1.279	1.29927	1.32189	1.27362	1.29646	1.27141	1.2974	1.2058	1.22001	1.20431	1.19955	1.24871	1.24157	1.28855	1.28444	1.3147	1.33564	1.36563	1.4276	1.34834	1.3771	1.43833	1.41294	1.50827	1.45859	1.396	1.34147	1.38182	1.36265	1.33543	1.30169	1.2774	1.24542	1.19924	1.12518	1.31293	1.49217	1.47038	1.44838	1.36246	1.33406	1.34517	1.38453
63	0.547166	0.556471	0.555952	0.557358	0.593228	0.555063	0.54482	0.531564	0.50056	0.506978	0.508875	0.501656	0.517824	0.492649	0.520428	0.546445	0.555327	0.587176	0.592027	0.629603	0.693332	0.739994	0.752609	0.754737	0.805906	0.845642	0.874579	0.90953	0.947833	1.00054	1.05595	1.10214	1.16245	1.10755	1.20467	1.26323	1.25657	1.35004	1.46232	1.36408	1.34744	1.32901	1.24618	1.28044	1.25111	1.24473	1.21286	1.20803	1.27093
64	0.576964	0.64262	0.647678	0.660697	0.626219	0.636143	0.623958	0.608894	0.565793	0.568638	0.559079	0.564935	0.500125	0.459115	0.441108	0.42943	0.394588	0.395666	0.355941	0.349928	0.333092	0.366079	0.345598	0.360129	0.349344	0.331122	0.355824	0.319927	0.311414	0.334145	0.335669	0.354724	0.422097	0.532423	0.578429	0.664067	0.679017	0.644677	0.671967	0.612631	0.520368	0.801343	0.727659	0.764946	0.896782	0.831065	0.827215	0.890358	0.877807
65	0.41801	0.428088	0.449569	0.417021	0.438413	0.429468	0.433003	0.398502	0.399451	0.423911	0.436645	0.430461	0.475492	0.534614	0.548068	0.663455	0.632628	0.706162	0.71893	0.6872	0.797329	0.770284	0.882018	0.858822	0.834538	1.00281	0.971716	0.898392	0.836941	0.947566	0.940266	1.03603	0.904526	0.905958	1.08737	1.15648	1.12603	1.11204	1.05313	1.0032	1.04692	1.02003	1.09467	1.09778	1.06702	0.979156	1.12188	1.07746	1.08981
66	0.546004	0.564975	0.636246	0.629179	0.635379	0.605054	0.672717	0.757428	0.705955	0.747511	0.819162	0.770889	0.847558	0.90248	0.833379	0.910721	0.898799	0.914235	1.04224	1.04916	1.02536	1.01856	1.04371	1.04844	1.04501	0.920904	0.946701	1.01871	1.01562	1.12844	1.06486	1.13095	1.10781	1.13199	1.04442	1.08815	1.07401	1.07083	1.09047	1.08702	1.11552	1.14034	1.14984	1.12606	1.15874	1.15072	1.17098	1.13178	1.17644
67	1.08123	1.1129	1.13035	1.12247	1.11956	1.16125	1.18923	1.14284	1.06957	1.06795	1.14859	1.11534	1.1319	1.20351	1.21208	1.11581	1.20703	1.18513	1.19029	1.16318	1.16482	1.17536	1.17259	1.23445	1.26165	1.25638	1.28411	1.21998	1.23454	1.27037	1.25285	1.33951	1.32768	1.26773	1.25825	1.08474	1.31182	1.38463	1.09984	1.1908	1.06828	1.29767	1.32384	1.30354	1.27417	1.33365	1.14482	1.26189	1.1674
68	0.969889	1.01559	1.03251	0.930601	0.900461	0.930694	1.00483	1.05981	1.05882	1.00223	1.06241	1.04053	0.997215	0.935492	0.984925	0.945944	1.01848	1.0916	1.01284	1.03129	1.03201	1.07491	1.17368	1.17377	1.2167	1.19	1.09983	1.04621	1.0967	1.12177	0.974704	1.3011	1.40768	1.37883	1.44122	1.39822	1.33487	1.21936	1.23927	1.29936	1.10015	1.20267	1.30621	1.3069	1.33908	1.21009	1.21866	1.26476	1.31345
69	1.0209	0.974863	1.00157	1.0715	1.19073	1.23981	1.19981	1.11955	1.15512	1.24256	1.20747	1.16901	1.21091	1.23466	1.21497	1.22113	1.20891	1.22412	1.19358	1.19712	1.22635	1.28094	1.07629	0.996436	1.08366	1.05977	1.08119	1.15537	1.34038	1.33745	1.32166	1.23823	1.32168	1.32448	1.34315	1.34675	1.3805	1.28946	1.2884	1.24265	1.16242	1.21635	1.31193	1.3171	1.33603	1.31117	1.38211	1.26625	1.23797
70	0.442998	0.464536	0.47319	0.500437	0.493742	0.521501	0.512134	0.539594	0.55328	0.54099	0.557774	0.581412	0.616243	0.608595	0.670957	0.698181	0.726133	0.755725	0.778063	0.844597	0.879287	0.882715	0.931208	1.01059	1.07904	1.1468	1.12398	1.18593	1.17305	1.17481	1.25816	1.24742	1.26366	1.18837	1.10054	1.20377	1.14267	1.19896	1.20293	1.13506	1.12447	1.15241	1.14956	1.24614	1.26236	1.22622	1.16365	1.12805	1.09345
71	1.13271	1.14831	1.14072	1.19256	1.26971	1.21193	1.21063	1.23596	1.16091	1.14013	1.17644	1.22768	1.19136	1.15432	1.24736	1.33549	1.32963	1.16114	1.24641	1.31965	1.32044	1.3126	1.37674	1.35555	1.30511	1.43189	1.42951	1.5973	1.52355	1.56976	1.59795	1.63313	1.3206	0.694942	0.614479	0.628521	0.890867	0.87079	0.862526	0.721534	0.650603	0.599582	0.634761	0.677108	0.738954	0.768486	0.771224	0.817782	0.8533
72	0.948492	0.952844	0.984448	0.965311	0.995688	1.04616	1.08401	1.0395	1.09817	1.10227	1.02338	1.00337	0.975909	1.02074	1.09875	1.07868	1.05383	1.10462	1.14432	1.14596	1.13621	1.15818	1.11751	1.18904	1.17426	1.21147	1.18506	1.18536	1.3212	1.33836	1.42792	1.47428	1.30708	1.41005	1.43644	1.43849	1.41991	1.46989	1.44212	1.44247	1.50605	1.42529	1.43905	1.45274	1.4489	1.39145	1.41514	1.4423	1.4646
73	0.620402	0.699077	0.758008	0.761519	0.800264	0.854293	0.895828	0.835067	0.925419	0.964355	1.01294	1.01677	1.10158	1.13432	1.16256	1.24204	1.33601	1.40696	1.419	1.39569	1.32089	1.29904	1.31846	1.30639	1.2659	1.19778	1.19056	1.13188	1.11486	1.20058	1.18399	1.15049	1.28744	1.35381	1.38105	1.37062	1.38903	1.41439	1.50441	1.52891	1.48658	1.42698	1.45994	1.50426	1.44391	1.48954	1.50894	1.52967	1.55936
74	1.17199	1.21304	1.20987	1.40001	1.35074	1.18199	1.30664	1.33981	1.26581	1.24797	1.281	1.30326	1.39726	1.34668	1.24843	1.30265	1.37612	1.52361	1.50315	1.56089	1.50553	1.48635	1.52954	1.57896	1.65345	1.58488	1.51967	1.52882	1.55517	1.34969	1.23765	1.42433	1.43314	1.43718	1.41645	1.38409	1.27176	1.32621	1.27074	1.30592	1.33596	1.26238	1.43771	1.35103	1.24968	1.25352	1.1011	1.27498	1.43674
75	0.952715	0.998705	1.00015	0.978358	1.07769	1.1786	1.215	1.22396	1.20891	1.25704	1.28213	1.27519	1.19386	1.17454	1.22289	1.20629	1.18276	1.09313	1.05089	1.12194	1.11607	1.21551	1.20005	1.18885	1.10118	1.2199	1.19743	1.05806	1.30472	1.32029	1.23454	1.2788	1.29572	1.25932	1.24636	1.23194	1.11091	1.21432	1.31077	1.25015	1.18817	1.19894	1.42382	1.24997	1.12584	1.2817	1.39641	1.39671	1.62348
76	0.9502	0.976142	1.00373	1.01644	1.07065	1.17722	1.11675	1.1708	1.15065	1.16157	1.22215	1.2912	1.26736	1.28067	1.24412	1.12755	1.29838	1.22173	1.26213	1.26461	1.30094	1.22404	1.24601	1.26626	1.24898	1.25079	1.36073	1.27901	1.31231	1.31759	1.24422	1.3055	1.29208	1.28861	1.29099	1.31555	1.33893	1.37928	1.33752	1.38962	1.39558	1.41717	1.4159	1.42879	1.40256	1.45293	1.40911	1.41956	1.40245
77	1.26024	1.39038	1.35859	1.29235	1.33834	1.32765	1.34844	1.31426	1.26436	1.25277	1.25264	1.31949	1.38826	1.50781	1.49873	1.43241	1.5036	1.45989	1.44083	1.33248	1.2358	1.22737	1.17542	1.15499	1.18361	1.13706	1.08995	1.18175	1.17123	1.20084	1.18318	1.21195	1.23908	1.25603	1.30164	1.4566	1.40763	1.26153	1.33067	1.32198	1.17833	1.34114	1.34605	1.43935	1.52372	1.29736	1.33511	1.463	1.48035
78	0.516656	0.548833	0.568362	0.618378	0.703882	0.802506	0.826125	0.846774	0.875909	0.882532	0.906563	0.922145	0.973293	1.01418	1.07062	1.22383	1.31518	1.35166	1.35602	1.40166	1.40813	1.4376	1.41239	1.40677	1.40256	1.39761	1.38122	1.3265	1.27041	1.27854	1.24512	1.26956	1.23633	1.17501	1.14214	1.17134	1.17601	1.20162	1.26203	1.32161	1.30428	1.3288	1.36966	1.36763	1.37579	1.3386	1.25107	1.26941	1.3084
79	0.585884	0.608394	0.618923	0.639207	0.594655	0.645062	0.651308	0.685278	0.749646	0.773895	0.889387	0.818816	0.81765	0.814048	0.871509	0.901818	0.887417	0.903647	0.958125	0.897297	0.893008	0.927553	1.03919	1.13942	1.08204	1.03863	1.18276	1.19279	0.930386	0.990134	0.88306	0.883293	0.941168	0.973802	1.02551	1.21089	1.00888	1.19016	1.36337	1.0976	0.848104	0.975059	1.10532	1.09641	1.3186	1.17279	1.17951	1.1552	1.14395
80	0.402922	0.3981	0.421607	0.421692	0.418794	0.422216	0.431159	0.461121	0.474339	0.531082	0.581023	0.619499	0.686458	0.704486	0.69333	0.744363	0.807454	0.860418	0.94219	0.98494	1.07391	1.15142	1.20426	1.23929	1.22501	1.2321	1.21894	1.13864	1.09494	1.1682	1.1572	1.15977	1.16798	1.10822	1.13718	1.23732	1.21708	1.26104	1.22747	1.16017	1.14881	1.14971	1.16304	1.14067	1.24545	1.26031	1.2991	1.31398	1.31239
81	1.09456	1.0866	1.10746	1.1034	1.10798	1.12687	1.08759	1.10631	1.11193	1.09368	1.13019	1.12199	1.13786	1.14506	1.13108	1.15427	1.13739	1.13402	1.13745	1.12343	1.11306	1.1414	1.2415	1.23985	1.23694	1.28886	1.25843	1.29256	1.31214	1.32651	1.25337	1.32658	1.38959	1.33607	1.38277	1.38123	1.32075	1.34152	1.32773	1.28501	1.31433	1.29965	1.26881	1.31505	1.29387	1.30287	1.37742	1.32408	1.33748
82	1.14431	1.1789	1.19208	1.17239	1.23479	1.2305	1.23684	1.20693	1.24265	1.24094	1.2065	1.19236	1.23479	1.23319	1.24965	1.15838	1.17225	1.19712	1.21103	1.19459	1.2169	1.17823	1.1838	1.21144	1.17093	1.18801	1.16049	1.2861	1.29432	1.33546	1.40757	1.40969	1.41026	1.25464	1.32322	1.27749	1.36599	1.36082	1.42787	1.45963	1.25465	1.43873	1.46901	1.5009	1.41145	1.2702	1.27231	1.30071	1.30626
83	0.677269	0.654426	0.671455	0.599814	0.622133	0.608995	0.594783	0.546612	0.578463	0.524433	0.536315	0.528332	0.476658	0.472462	0.456008	0.44582	0.475464	0.482006	0.440061	0.454712	0.440632	0.418336	0.423298	0.413916	0.429729	0.415378	0.434959	0.443971	0.468646	0.482333	0.496902	0.517294	0.541204	0.570683	0.632595	0.651362	0.664513	0.752815	0.783297	0.785386	0.826242	0.868231	0.935901	0.956848	0.921823	0.994791	1.10197	1.17176	1.24393
84	1.06541	1.0148	1.06172	1.07358	1.10193	1.11605	1.06032	1.05341	1.08945	0.987331	1.03732	0.995141	1.00819	0.97252	0.998592	1.01101	1.02864	1.01956	1.08013	1.12561	1.1512	1.16747	1.11333	1.14234	1.17037	1.23627	1.21134	1.2369	1.20871	1.15069	1.17731	1.17432	1.1983	1.17272	1.21759	1.18496	1.18926	1.23417	1.19314	1.22737	1.19831	1.20521	1.29052	1.34744	1.35849	1.28898	1.30481	1.25998	1.31452
85	0.569604	0.546272	0.490279	0.459893	0.443985	0.443841	0.415528	0.415978	0.415944	0.400584	0.41275	0.392254	0.398509	0.380425	0.412178	0.407523	0.376826	0.403092	0.391484	0.394787	0.391056	0.428609	0.416659	0.442622	0.412848	0.445441	0.458479	0.419271	0.434434	0.448321	0.456019	0.460672	0.450289	0.460912	0.481939	0.520639	0.571538	0.635948	0.639294	0.672489	0.703011	0.729374	0.751613	0.733384	0.779465	0.813072	0.906362	0.977569	1.01442
86	0.454855	0.469454	0.490172	0.500416	0.514678	0.564474	0.58278	0.612102	0.641373	0.669047	0.684512	0.688865	0.703863	0.709135	0.709969	0.710792	0.735027	0.737555	0.723834	0.698819	0.680375	0.660885	0.620342	0.593917	0.549511	0.547739	0.523993	0.516173	0.50486	0.512754	0.492395	0.520226	0.56259	0.667356	0.740748	0.78865	0.765639	0.749189	0.70768	0.657151	0.593993	0.576022	0.546003	0.545884	0.551928	0.561158	0.584234	0.66297	0.808625
87	0.824168	0.872389	0.881328	0.933727	0.926808	0.959375	0.98116	1.00717	1.08381	1.13705	1.19381	1.23918	1.26553	1.31999	1.40385	1.38621	1.43087	1.40613	1.43241	1.41812	1.37553	1.3894	1.42282	1.48183	1.49673	1.5247	1.52799	1.62126	1.64247	1.67043	1.65483	1.64437	1.68428	1.75097	1.69397	1.6868	1.68101	1.60798	1.60648	1.52503	1.50058	1.44514	1.43069	1.34204	1.34461	1.29451	1.37215	1.41415	1.30506
88	0.658935	0.701287	0.666166	0.772429	0.695648	0.764911	0.692518	0.800766	0.730173	0.818457	0.816782	0.818989	0.786513	0.826696	0.990849	1.02112	1.08246	0.944189	0.378571	0.687109	0.622554	0.570265	0.491283	0.527862	0.475975	0.540348	0.538261	0.537642	0.505459	0.596108	0.646107	0.652171	0.612976	0.757246	0.763325	0.792188	0.838002	0.858676	0.864543	0.909614	0.878375	0.898809	0.970101	0.877394	0.846067	1.12048	0.980997	0.988598	0.999896
89	0.445011	0.423982	0.456091	0.446897	0.407398	0.421139	0.444646	0.457506	0.452094	0.44537	0.448976	0.451495	0.444078	0.435049	0.447472	0.414251	0.435911	0.431398	0.448411	0.454926	0.438062	0.449387	0.503801	0.632489	0.640159	0.687192	0.641463	0.68262	0.772218	0.826911	0.901592	0.928354	1.04525	1.01565	1.03277	1.07636	1.14806	1.21316	1.22466	1.30037	1.42404	1.28239	1.29167	1.24824	1.21699	1.17522	1.15579	1.17806	1.16061
90	0.788005	0.800598	0.845176	0.866216	0.892501	0.894488	0.937233	0.951119	1.00566	1.11895	1.13104	1.1704	1.2271	1.27362	1.28849	1.27672	1.47027	1.39633	1.41366	1.3702	1.37306	1.33307	1.26292	1.2602	1.23978	1.24601	1.29313	1.25699	1.25154	1.25717	1.31638	1.3664	1.3865	1.32478	1.38875	1.37244	1.51975	1.47996	1.45844	1.46888	1.43878	1.35684	1.29576	1.36111	1.41065	1.46591	1.51762	1.62625	1.57867
91	1.24747	1.31224	1.25593	1.37968	1.51484	1.47019	1.44854	1.40964	1.3574	1.3278	1.33142	1.28751	1.34408	1.37316	1.35505	1.49587	1.49047	1.45896	1.45577	1.46824	1.47377	1.40324	1.4168	1.44343	1.47592	1.51906	1.45985	1.49372	1.43216	1.44178	1.51774	1.45367	1.49562	1.5325	1.54921	1.56444	1.59795	1.7316	1.80891	1.76885	1.51094	1.4617	1.37879	1.38067	1.44473	1.47254	1.52056	1.54066	1.49574
92	0.620402	0.699077	0.758008	0.761519	0.800264	0.854293	0.895828	0.835067	0.925419	0.964355	1.01294	1.01677	1.10158	1.13432	1.16256	1.24204	1.33601	1.40696	1.419	1.39569	1.32089	1.29904	1.31846	1.30639	1.2659	1.19778	1.19056	1.13188	1.11486	1.20058	1.18399	1.15049	1.28744	1.35381	1.38105	1.37062	1.38903	1.41439	1.50441	1.52891	1.48658	1.42698	1.45994	1.50426	1.44391	1.48954	1.50894	1.52967	1.55936
93	0.721082	0.707669	0.674702	0.706692	0.752143	0.843446	0.871063	0.930012	0.93227	0.892782	0.958482	1.00263	1.18898	1.46739	1.49172	1.47738	1.44118	1.38118	1.31833	1.28651	1.26008	1.29963	1.34827	1.2093	1.29688	1.44707	1.44823	1.43122	1.37159	1.36557	1.38403	1.31368	1.30013	1.07912	1.07456	1.20477	1.20723	1.18126	1.23563	1.288	1.15181	1.29911	1.38367	1.25353	1.31638	1.21801	1.32452	1.40719	1.34957
94	0.953174	1.00899	1.08048	1.09212	1.10287	1.17867	1.19557	1.25325	1.22798	1.27508	1.30154	1.31584	1.32502	1.33339	1.37851	1.38308	1.36525	1.41011	1.4135	1.34045	1.35957	1.42194	1.43231	1.4434	1.5121	1.48945	1.48933	1.48591	1.49921	1.49696	1.46914	1.44037	1.49848	1.47587	1.383	1.43737	1.43599	1.415	1.46232	1.49568	1.55198	1.57931	1.57034	1.54719	1.56567	1.57939	1.50524	1.55456	1.52896
95	0.547166	0.556471	0.555952	0.557358	0.593228	0.555063	0.54482	0.531564	0.50056	0.506978	0.508875	0.501656	0.517824	0.492649	0.520428	0.546445	0.555327	0.587176	0.592027	0.629603	0.693332	0.739994	0.752609	0.754737	0.805906	0.845642	0.874579	0.90953	0.947833	1.00054	1.05595	1.10214	1.16245	1.10755	1.20467	1.26323	1.25657	1.35004	1.46232	1.36408	1.34744	1.32901	1.24618	1.28044	1.25111	1.24473	1.21286	1.20803	1.27093
96	0.538652	0.508846	0.517111	0.504546	0.505307	0.502189	0.504119	0.503288	0.489383	0.474512	0.455337	0.438709	0.455562	0.474068	0.494087	0.500395	0.507298	0.5341	1.21153	1.3395	1.34189	1.34171	1.35495	1.3739	1.34442	1.35662	1.33613	1.46166	1.38367	1.43717	1.44186	1.32597	1.40586	1.41983	1.30854	1.43365	1.4437	1.55028	1.41482	1.43468	1.38225	1.2395	1.2653	1.30705	1.31301	0.921035	0.790798	0.738767	0.674428
97	1.39618	1.50401	1.44311	1.30894	1.32573	1.31467	1.23573	1.28731	1.26348	1.22394	1.34414	1.32124	1.28766	1.32363	1.3176	1.38768	1.40024	1.4116	1.40085	1.25289	1.09178	1.15359	1.2921	1.14114	1.21663	1.19697	1.34146	1.41769	1.4419	1.26365	1.3264	1.30121	1.34402	1.28157	1.16865	1.16104	1.26285	1.18982	1.3601	1.45771	1.34858	1.37849	1.54145	1.62692	1.53058	1.47142	1.41472	1.47821	1.41428
98	0.57948	0.58709	0.65279	0.70228	0.692039	0.729863	0.771965	0.735883	0.825759	0.842047	0.885751	0.996296	1.02306	0.977685	1.00967	1.01654	1.07107	0.992752	0.98837	1.00253	1.07861	1.17641	1.17838	1.19148	1.12655	1.1427	1.21197	1.08565	1.22041	1.2673	1.30974	1.33253	1.31713	1.4893	1.46587	1.47428	1.40673	1.3522	1.28299	1.27867	1.37897	1.17573	1.29125	1.38237	1.30042	1.23434	1.1014	1.13137	1.11673
99	1.11748	1.04591	1.13752	1.01389	0.9103	0.85554	0.969901	1.14071	1.06721	1.32076	1.01708	1.00321	1.02889	1.10962	0.932891	0.51964	0.563922	0.395329	0.526185	0.596235	0.640168	0.519222	0.485452	0.786079	0.819092	0.797893	0.798941	0.807328	0.814678	0.806793	0.858587	0.89403	0.965212	0.994874	1.02838	1.13735	1.14016	1.1084	1.23824	1.06384	1.16121	1.26893	1.32446	1.33554	1.24937	1.3329	1.39201	1.15384	1.06701
100	1.00065	1.08478	1.13338	1.21775	1.21334	1.16593	1.17708	1.1277	1.21615	1.29631	1.24961	1.3179	1.32473	1.40207	1.40886	1.44825	1.427	1.38385	1.33245	1.34774	1.37333	1.39954	1.42809	1.44594	1.42665	1.39985	1.35021	1.30139	1.26089	1.27547	1.33435	1.4021	1.43425	1.31887	1.43842	1.45145	1.50376	1.47999	1.3835	1.34187	1.15979	0.952498	1.02811	0.958755	1.19175	1.20626	1.08486	1.24757	1.20939
101	0.611057	0.62279	0.685886	0.666238	0.639777	0.660255	0.736371	0.779346	0.789431	0.822927	0.843246	0.929724	1.01708	1.01416	1.10778	1.17055	1.17462	1.14783	1.12257	1.1319	1.18447	1.12675	1.14511	1.2458	1.25225	1.23416	1.29976	1.31564	1.34152	1.40885	1.44004	1.37808	1.28554	1.28661	1.27844	1.24434	1.27511	1.29517	1.37639	1.29127	1.38895	1.39284	1.38764	1.39755	1.34377	1.34052	1.41982	1.34815	1.28459
102	0.965608	1.00987	1.02053	1.05405	1.04079	1.05793	1.0716	1.14855	1.13292	1.13511	1.15644	1.19312	1.26534	1.26102	1.26441	1.23244	1.05727	0.950327	0.940433	1.11267	1.05366	0.900328	1.03574	0.887008	0.889156	1.05038	1.07699	1.08388	1.03473	1.02772	1.0724	1.07329	1.10602	1.14537	1.1507	1.25676	1.2884	1.257	1.21479	1.19374	1.19746	1.0805	1.11771	1.10558	1.30864	1.30617	1.27144	1.13908	1.17414
103	1.06643	1.03489	1.13355	1.19463	1.2228	1.21637	1.35471	1.35951	1.38921	1.37213	1.41277	1.40721	1.37693	1.36944	1.3081	1.21871	1.28075	1.24471	1.21276	1.30946	1.38707	1.31303	1.19508	1.31342	1.35289	1.37639	1.40592	1.29533	1.28244	1.38247	1.46199	1.30793	1.21088	1.23313	1.22761	1.21998	1.30738	1.10173	0.769116	0.706012	0.74124	0.839248	0.555003	0.706569	0.577518	0.5047	0.467896	0.502285	0.482949
104	1.39618	1.50401	1.44311	1.30894	1.32573	1.31467	1.23573	1.28731	1.26348	1.22394	1.34414	1.32124	1.28766	1.32363	1.3176	1.38768	1.40024	1.4116	1.40085	1.25289	1.09178	1.15359	1.2921	1.14114	1.21663	1.19697	1.34146	1.41769	1.4419	1.26365	1.3264	1.30121	1.34402	1.28157	1.16865	1.16104	1.26285	1.18982	1.3601	1.45771	1.34858	1.37849	1.54145	1.62692	1.53058	1.47142	1.41472	1.47821	1.41428
105	0.542388	0.596859	0.732511	0.683369	0.794564	0.840649	0.932425	0.933781	0.878832	0.819123	0.882712	0.840643	0.843597	0.887989	0.931609	0.915896	0.980356	1.05739	1.05045	1.05095	1.02253	1.02536	0.966896	0.916448	0.951183	0.874245	0.819681	0.847762	0.924503	0.914147	0.95342	0.925387	0.9212	0.943726	0.932713	0.912296	0.953757	0.9367	0.839598	0.923092	0.894655	0.865241	0.869609	0.973572	0.930111	1.08386	1.07345	1.19584	1.44319
106	0.397924	0.394229	0.408819	0.412022	0.412576	0.397367	0.395399	0.448617	0.522753	0.576479	0.644581	0.660941	0.725853	0.752222	0.780072	0.803116	0.80875	0.820115	0.886382	0.972526	1.00774	1.1314	1.14331	1.19041	1.25672	1.22323	1.17592	1.18374	1.16287	1.18567	1.21376	1.21599	1.18959	1.17079	1.21232	1.21306	1.25362	1.17681	1.25433	1.21665	1.07662	1.05966	1.02523	1.06028	0.993409	1.05754	1.06035	1.10653	1.1769
107	0.542388	0.596859	0.732511	0.683369	0.794564	0.840649	0.932425	0.933781	0.878832	0.819123	0.882712	0.840643	0.843597	0.887989	0.931609	0.915896	0.980356	1.05739	1.05045	1.05095	1.02253	1.02536	0.966896	0.916448	0.951183	0.874245	0.819681	0.847762	0.924503	0.914147	0.95342	0.925387	0.9212	0.943726	0.932713	0.912296	0.953757	0.9367	0.839598	0.923092	0.894655	0.865241	0.869609	0.973572	0.930111	1.08386	1.07345	1.19584	1.44319
108	1.2049	1.1893	1.19116	1.23533	1.33072	1.32157	1.31042	1.27125	1.29108	1.28301	1.34431	1.28778	1.2727	1.21093	1.16078	1.24753	1.212	1.22132	1.3267	1.17282	1.25125	1.21694	1.19623	1.06889	1.14747	1.06826	1.09908	1.09224	1.05247	1.19792	1.10796	1.13987	1.22418	1.24522	1.25434	0.972941	1.19265	1.15016	1.16387	1.10287	1.14777	1.05862	1.15933	1.36382	1.27169	1.19965	0.833921	0.726667	0.717788
109	0.715345	0.742664	0.788115	0.723704	0.741295	0.774295	0.750964	0.788528	0.833003	0.901312	0.874153	0.880327	0.858762	0.891505	0.900168	0.921263	0.993387	1.11334	1.18288	1.2554	1.26065	1.21611	1.20741	1.22957	1.18337	1.19124	1.16523	1.14676	1.29011	1.3298	1.29585	1.28088	1.12311	1.19537	1.20302	1.1653	1.08946	1.15154	1.26349	1.24034	1.33872	1.27005	1.28918	1.36794	1.31668	1.32448	1.23818	1.36265	1.37312
110	0.709066	0.757344	0.793401	0.817246	0.803482	0.805646	0.806285	0.820792	0.857067	0.879869	0.871607	0.885341	0.954299	0.943932	1.06123	1.14316	1.13354	1.10142	1.03931	1.02595	1.00659	1.1051	1.13846	1.1119	1.08625	1.16129	1.20722	1.20738	1.19999	1.1779	1.20033	1.20139	1.15847	1.13485	1.19282	1.24164	1.27835	1.23896	1.31639	1.31743	1.25857	1.2895	1.35399	1.27254	1.15543	1.069	1.16589	1.24289	1.13351
111	0.454855	0.469454	0.490172	0.500416	0.514678	0.564474	0.58278	0.612102	0.641373	0.669047	0.684512	0.688865	0.703863	0.709135	0.709969	0.710792	0.735027	0.737555	0.723834	0.698819	0.680375	0.660885	0.620342	0.593917	0.549511	0.547739	0.523993	0.516173	0.50486	0.512754	0.492395	0.520226	0.56259	0.667356	0.740748	0.78865	0.765639	0.749189	0.70768	0.657151	0.593993	0.576022	0.546003	0.545884	0.551928	0.561158	0.584234	0.66297	0.808625
112	0.715345	0.742664	0.788115	0.723704	0.741295	0.774295	0.750964	0.788528	0.833003	0.901312	0.874153	0.880327	0.858762	0.891505	0.900168	0.921263	0.993387	1.11334	1.18288	1.2554	1.26065	1.21611	1.20741	1.22957	1.18337	1.19124	1.16523	1.14676	1.29011	1.3298	1.29585	1.28088	1.12311	1.19537	1.20302	1.1653	1.08946	1.15154	1.26349	1.24034	1.33872	1.27005	1.28918	1.36794	1.31668	1.32448	1.23818	1.36265	1.37312
113	1.00872	0.930013	1.05562	1.08815	1.02382	1.11064	1.01406	1.13819	1.09681	1.06189	1.09914	1.08676	1.00296	1.03882	0.988559	1.05498	1.0642	1.07063	1.02183	0.895496	0.999565	1.10882	1.12617	1.35757	1.30522	1.35542	1.3243	1.3033	1.1816	1.17007	1.33991	1.40011	1.29486	1.28835	1.46834	1.56154	1.66448	1.60733	1.42723	1.35512	1.17327	1.30872	1.63705	1.59474	1.59058	1.37004	1.35298	1.59964	1.54467
114	0.945944	1.02735	1.11261	1.03719	1.04808	1.12711	1.12935	1.16078	1.2627	1.24061	1.28909	1.27462	1.09799	1.12512	1.15641	1.13376	1.17996	1.13697	1.11573	1.03103	1.04911	1.3183	1.25093	1.13496	1.30997	1.29048	1.33015	1.39032	1.16908	1.02705	1.13848	1.22024	1.2754	1.23347	1.27445	1.40306	1.30273	1.29693	1.44757	1.48902	1.07206	1.2261	1.27473	1.31235	1.19932	1.22672	1.22822	1.1787	1.21826
115	1.00872	0.930013	1.05562	1.08815	1.02382	1.11064	1.01406	1.13819	1.09681	1.06189	1.09914	1.08676	1.00296	1.03882	0.988559	1.05498	1.0642	1.07063	1.02183	0.895496	0.999565	1.10882	1.12617	1.35757	1.30522	1.35542	1.3243	1.3033	1.1816	1.17007	1.33991	1.40011	1.29486	1.28835	1.46834	1.56154	1.66448	1.60733	1.42723	1.35512	1.17327	1.30872	1.63705	1.59474	1.59058	1.37004	1.35298	1.59964	1.54467
116	1.13981	1.10641	1.19279	1.19745	1.1817	1.23044	1.22371	1.19797	1.26558	1.25954	1.19389	1.14403	1.20806	1.15278	1.17487	1.19075	1.13922	1.08898	1.13763	1.17241	1.05983	1.09179	1.10265	1.05276	1.20227	1.19847	1.26017	1.36145	1.3846	1.46802	1.42669	1.46603	1.53301	1.50719	1.57077	1.49379	1.47436	1.39969	1.32568	1.33511	1.30316	1.40354	1.45445	1.39409	1.48619	1.55182	1.58478	1.54514	1.5468
117	1.19747	1.19547	1.23239	1.18365	1.20528	1.23932	1.15558	1.12236	1.11195	1.12967	1.16119	1.1431	1.16752	1.21041	1.17711	1.27516	1.20083	1.18603	1.22244	1.29688	1.29328	1.30634	1.33971	1.31357	1.37541	1.28417	1.25786	1.23596	1.16446	1.10632	1.05947	1.12797	1.1749	1.07982	1.03924	1.03443	1.02379	1.01806	1.02941	1.02106	0.983367	0.954507	0.955298	1.10486	1.2201	1.20078	1.1171	1.07471	1.26307
118	0.740443	0.75828	0.714498	0.664958	0.675812	0.624641	0.671727	0.703055	0.670714	0.641753	0.642397	0.642824	0.61735	0.580353	0.539826	0.530804	0.52444	0.57502	0.621804	0.709611	0.844561	0.948968	0.997756	1.04138		0.809537	0.915135	0.930633	1.00063	1.07999	1.17836	1.18179	1.23057	1.14103	1.14847	1.23499	1.24038	1.29593	1.3432	1.31107	1.33676	1.26262	1.34579	1.21935	1.12235	1.26916	1.27179	1.23917	1.2947
119	1.1346	0.798406	0.856434	0.989721	1.02533	1.08259	1.0913	1.23472	1.19639	1.29206	1.25094	1.23039	1.26612	1.25398	1.24733	1.28272	1.35326	1.38271	1.07684	1.17559	1.28395	1.29213	1.37977	1.44968	1.40878	1.45092	1.42472	1.43112	1.46884	1.50481	1.42789	1.44394	1.54056	1.46772	1.2968	1.36416	1.40912	1.43934	1.50119	1.52064	1.52279	1.51627	1.47139	1.52067	1.50743	1.5688	1.55387	1.60249	1.68236
120	0.37499	0.390168	0.400808	0.425346	0.404017	0.427015	0.456096	0.461793	0.484976	0.455059	0.424572	0.43121	0.429859	0.458261	0.458493	0.480566	0.51968	0.50018	0.517323	0.533825	0.57566	0.581966	0.55465	0.585358	0.570202	0.565587	0.639433	0.663474	0.723277	0.790187	0.800502	0.858063	0.886035	0.89688	0.940016	1.01572	1.04503	1.17577	1.07099	1.12273	1.0493	0.878146	1.07496	1.07554	1.16835	1.21646	1.19084	1.147	1.20792
121	0.430586	0.44977	0.458923	0.452949	0.439681	0.421125	0.407316	0.416367	0.424118	0.404942	0.426482	0.432623	0.453703	0.478379	0.473671	0.510544	0.528278	0.557809	0.552373	0.554864	0.581153	0.659648	0.693113	0.762406	0.839358	0.83032	0.854066	0.888019	0.924221	1.00617	0.990797	1.13173	1.08556	1.08967	1.08511	1.25389	1.19826	1.23508	1.18902	1.13105	1.19833	1.22484	1.12596	1.06335	1.07362	1.05103	1.22657	1.33968	1.31928
122	0.952406	1.10289	1.12305	1.10113	1.1055	1.02591	1.1188	1.11944	0.994993	1.06502	1.05832	1.01667	1.16193	1.08098	1.24736	1.31316	1.28296	1.26519	1.2593	1.26441	1.23984	1.0952	1.28407	1.19864	1.09101	1.20133	1.36463	1.23079	1.243	1.34429	1.25184	1.08696	1.3861	1.3099	1.32325	1.25364	1.27185	1.15921	1.13437	1.28943	0.318866	0.339464	0.351511	0.713997	0.681679	0.562498	0.550032	0.557913	0.523237
123	0.968924	0.932626	0.945655	0.963758	1.03297	0.788672	0.930299	0.962176	1.08721	1.09054	1.01815	1.12765	1.02749	1.12845	1.18646	1.2891	1.23134	1.30203	1.20201	1.26323	1.31287	1.22498	1.04628	1.095	1.19493	1.14443	1.07562	1.11164	1.11332	1.1825	1.22561	1.26891	1.3288	1.38004	1.40743	1.43253	1.45274	1.46537	1.48595	1.5083	1.51322	1.56014	1.46307	1.39155	1.3625	1.32845	1.36227	1.31428	1.39495
124	0.49085	0.497973	0.519697	0.554296	0.472973	0.452956	0.497199	0.491077	0.557391	0.600079	0.659708	0.679181	0.744265	0.836219	0.797394	0.901722	0.894407	0.895558	0.882367	0.853794	0.941435	1.01372	0.911598	0.85114	0.88192	0.896826	0.896101	0.952653	0.86861	0.923218	0.957566	0.89463	1.02625	0.886297	0.969899	1.07549	1.03978	0.906341	0.973279	1.00656	0.940315	0.978195	1.07127	0.973098	1.05557	1.04148	1.11842	1.0405	1.0842
125	1.02029	1.17959	1.18319	1.31978	1.25407	1.073	0.84301	0.801747	0.843377	0.867855	0.833001	0.98835	0.993087	1.09497	0.98619	0.959919	0.960272	1.07079	1.51202	1.53969	1.44035	1.37572	1.9416	1.789	1.39532	1.92952	1.33015	1.08096	1.05217	1.21351	1.23253	1.15291	1.11106	1.14787	1.16764	1.22383	1.20109	1.12467	1.13171	1.10591	1.11797	1.07407	1.14003	1.17234	1.33075	1.35016	1.31722	1.30148	1.35343
126	1.23124	1.25961	1.30299	1.26504	1.24998	1.23499	1.19414	1.18996	1.20703	1.2268	1.25759	1.32923	1.35639	1.3606	1.34531	1.30207	1.22689	1.16037	1.23563	1.21284	1.20391	1.27568	1.17976	1.24926	1.30185	1.33073	1.27858	1.13302	1.15901	1.07469	1.22102	1.24008	1.23976	1.17084	1.25085	1.18357	1.03308	1.17603	1.29336	1.1443	1.11137	1.18437	1.14467	1.19566	1.04	0.922338	0.994906	1.19811	1.16786
127	0.735599	0.731647	0.832895	0.87947	0.936768	1.01571	1.0437	1.00702	1.03607	1.02973	1.02833	1.11878	1.10271	1.07672	1.11483	1.16485	1.08398	1.27207	1.26567	1.20376	1.21809	1.26718	1.2176	1.2864	1.25044	1.24985	1.22934	1.29571	1.37107	1.29252	1.18209	1.28319	1.26096	1.33673	1.28687	1.33685	1.24058	1.29297	1.24211	1.26857	1.30024	1.43886	1.46174	1.44601	1.47011	1.24769	1.34014	1.39303	1.36752
128	1.02437	1.01721	1.01611	1.02751	1.10226	1.16731	1.09497	1.06368	1.06484	1.08054	1.05967	1.0664	0.998231	1.14972	1.17782	1.17444	1.20395	1.09481	1.10385	1.11075	1.00341	1.05332	1.16372	1.12592	1.14759	1.22456	1.17089	1.03392	1.06068	1.11207	1.08857	1.19716	1.01099	1.18642	1.23445	1.22715	1.17434	1.30771	1.07571	1.22859	1.21713	1.20662	1.30002	1.39582	1.42312	1.39718	1.28669	1.21316	1.1445
129	0.721082	0.707669	0.674702	0.706692	0.752143	0.843446	0.871063	0.930012	0.93227	0.892782	0.958482	1.00263	1.18898	1.46739	1.49172	1.47738	1.44118	1.38118	1.31833	1.28651	1.26008	1.29963	1.34827	1.2093	1.29688	1.44707	1.44823	1.43122	1.37159	1.36557	1.38403	1.31368	1.30013	1.07912	1.07456	1.20477	1.20723	1.18126	1.23563	1.288	1.15181	1.29911	1.38367	1.25353	1.31638	1.21801	1.32452	1.40719	1.34957
130	1.02437	1.01721	1.01611	1.02751	1.10226	1.16731	1.09497	1.06368	1.06484	1.08054	1.05967	1.0664	0.998231	1.14972	1.17782	1.17444	1.20395	1.09481	1.10385	1.11075	1.00341	1.05332	1.16372	1.12592	1.14759	1.22456	1.17089	1.03392	1.06068	1.11207	1.08857	1.19716	1.01099	1.18642	1.23445	1.22715	1.17434	1.30771	1.07571	1.22859	1.21713	1.20662	1.30002	1.39582	1.42312	1.39718	1.28669	1.21316	1.1445
131	1.0812	1.07644	1.12522	1.20257	1.30638	1.32766	1.3397	1.33459	1.42465	1.43243	1.41505	1.3694	1.39639	1.43395	1.49016	1.39978	1.43184	1.45472	1.42216	1.38736	1.30669	1.35766	1.31971	1.25329	1.29751	1.26769	1.35124	1.24239	1.30778	1.29793	1.31545	1.36496	1.24225	1.36693	1.38792	1.35347	1.41528	1.52344	1.57052	1.52642	1.51566	1.51162	1.52929	1.45925	1.50061	1.56916	1.55467	1.63974	1.63773
132	0.852267	0.898838	0.923697	0.921729	1.00302	1.07215	1.05075	1.09179	1.15533	1.0441	1.13534	1.2081	1.20527	1.22183	1.21377	1.23625	1.21378	1.22369	1.21629	1.15319	1.20356	1.24722	1.2715	1.3624	1.38089	1.36687	1.26959	1.2903	1.29844	1.29768	1.28952	1.37336	1.36013	1.38529	1.42108	1.36128	1.41462	1.35568	1.40086	1.47128	1.43832	1.39902	1.45052	1.45614	1.46242	1.44222	1.50028	1.50097	1.55464
133	1.2441	1.30729	1.38308	1.35992	1.35424	1.40346	1.33883	1.33791	1.37025	1.23594	1.26918	1.35029	1.3088	1.29942	1.52798	1.44651	1.26444	1.21843	1.28741	1.37779	1.41555	1.52452	1.53104	1.36448	1.38795	1.24356	1.21209	0.965785	1.15603	1.17504	1.1238	1.18705	1.01219	1.32145	1.32457	1.15212	1.2139	0.976399	0.662073	0.649512	0.610456	0.533077	0.682379	0.623966	0.509604	0.473775	0.447309	0.433622	0.422837
134	0.658935	0.701287	0.666166	0.772429	0.695648	0.764911	0.692518	0.800766	0.730173	0.818457	0.816782	0.818989	0.786513	0.826696	0.990849	1.02112	1.08246	0.944189	0.378571	0.687109	0.622554	0.570265	0.491283	0.527862	0.475975	0.540348	0.538261	0.537642	0.505459	0.596108	0.646107	0.652171	0.612976	0.757246	0.763325	0.792188	0.838002	0.858676	0.864543	0.909614	0.878375	0.898809	0.970101	0.877394	0.846067	1.12048	0.980997	0.988598	0.999896
135	1.18573	1.30571	1.12637	1.15345	1.05722	1.16509	1.04748	1.21602	1.12762	1.11173	1.23836	1.25483	1.29897	1.21757	1.22798	1.23999	1.23521	1.28475	1.33857	1.38651	1.37419	1.19091	1.13527	1.15012	1.15083	1.10369	1.10022	1.28895	1.12534	1.12166	1.03577	0.595211	0.520004	0.753277	0.669909	0.726746	0.586342	0.489766	0.411542	0.382956	0.338826	0.333993	0.353272	0.346041	0.337979	0.366813	0.319428	0.353483	0.339912
136	0.397924	0.394229	0.408819	0.412022	0.412576	0.397367	0.395399	0.448617	0.522753	0.576479	0.644581	0.660941	0.725853	0.752222	0.780072	0.803116	0.80875	0.820115	0.886382	0.972526	1.00774	1.1314	1.14331	1.19041	1.25672	1.22323	1.17592	1.18374	1.16287	1.18567	1.21376	1.21599	1.18959	1.17079	1.21232	1.21306	1.25362	1.17681	1.25433	1.21665	1.07662	1.05966	1.02523	1.06028	0.993409	1.05754	1.06035	1.10653	1.1769
137	1.08195	1.09762	1.16436	1.20398	1.31079	1.27411	1.3214	1.3616	1.37171	1.42711	1.36353	1.40629	1.38221	1.3947	1.40922	1.34848	1.33839	1.29531	1.38101	1.35888	1.431	1.41914	1.48104	1.43922	1.4609	1.48041	1.42012	1.40376	1.39	1.34312	1.42823	1.38127	1.40545	1.4035	1.41994	1.40691	1.43989	1.38885	1.40349	1.26384	1.24072	1.24581	1.19361	1.23788	1.23853	1.18528	1.24505	1.32411	1.24466
138	1.0299	1.07005	1.07614	1.02964	1.03183	1.08695	1.15704	1.24488	1.29815	1.37129	1.41716	1.43169	1.47405	1.37297	1.38626	1.41023	1.42537	1.45214	1.35485	1.37209	1.38213	1.36083	1.30474	1.31859	1.34453	1.25205	1.21199	1.23508	1.34166	1.35665	1.27932	1.30268	1.35178	1.36522	1.35072	1.43973	1.3962	1.37835	1.38721	1.40991	1.41599	1.40574	1.53383	1.53724	1.48504	1.39556	1.42181	1.42108	1.44046
139	0.548059	0.583172	0.620997	0.612787	0.649962	0.698073	0.712156	0.703069		0.746447	0.806901	0.872703	0.923729	0.911574	0.968886	0.926809	1.02762	0.822598	0.855652	0.871541	0.952209	1.07416	1.11311	1.09785	1.12041	1.15093	1.19871	1.1287	1.11734	1.08519	1.04348	1.0063	1.06122	1.06472	1.18599	1.35952	1.47223	1.39042	1.41135	1.43151	1.15753	1.11155	1.27949	1.356	1.52849	1.53858	1.40439	1.23767	1.31624
140	1.15557	1.10191	1.25055	1.19071	1.19841	1.29963	1.27163	1.22633	1.22072	1.31861	1.20571	1.30759	1.32087	1.29856	1.23756	1.21682	1.28777	1.31449	1.22833	1.30047	1.31084	1.3115	1.40498	1.38828	1.30579	1.27353	1.31325	1.31965	1.27722	1.25797	1.2131	1.15409	1.16298	1.12315	1.1725	1.22476	1.23061	1.35069	1.36824	1.35989	1.40154	1.29421	1.24819	1.33571	1.43579	1.5093	1.54385	1.4967	1.39083
141	0.652836	0.708591	0.725132	0.744969	0.773684	0.808452	0.853567	0.835758	0.86506	0.970459	1.01985	1.07851	1.22388	1.26989	1.19525	1.14493	1.17534	1.2517	1.22099	1.19034	1.22655	1.23256	1.22851	1.24341	1.2822	1.21522	1.21314	1.33968	1.35447	1.26657	1.19503	1.22626	1.03215	1.00515	1.10065	1.12379	1.31153	1.30972	1.30567	1.09055	0.997056	1.04882	1.18834	1.28168	1.24957	1.2916	1.32263	1.23399	1.35623
142	1.06541	1.0148	1.06172	1.07358	1.10193	1.11605	1.06032	1.05341	1.08945	0.987331	1.03732	0.995141	1.00819	0.97252	0.998592	1.01101	1.02864	1.01956	1.08013	1.12561	1.1512	1.16747	1.11333	1.14234	1.17037	1.23627	1.21134	1.2369	1.20871	1.15069	1.17731	1.17432	1.1983	1.17272	1.21759	1.18496	1.18926	1.23417	1.19314	1.22737	1.19831	1.20521	1.29052	1.34744	1.35849	1.28898	1.30481	1.25998	1.31452
143	1.13647	1.04702	1.08437	1.13743	1.08719	1.05775	1.06386	1.19169	1.1321	1.07485	1.3553	1.3968	1.32713	1.30303	1.30386	1.27983	1.30462	1.25719	1.29315	1.2904	1.25636	1.34761	1.42239	1.30683	0.764845	0.718287	0.846374	0.711462	0.758906	0.702826	0.655424	0.614282	0.63043	0.638175	0.65656	0.687573	0.719729	0.722395	0.742588	0.758402	0.762965	0.783093	0.865954	0.852535	0.923454	1.00698	1.07393	1.1237	1.15994
144	1.14259	1.16599	1.21151	1.17664	1.13971	1.24097	1.22414	1.23833	1.20197	1.19435	1.25875	1.2282	1.28107	1.29235	1.3337	1.30995	1.22018	1.1659	1.14111	1.10194	1.18108	1.18281	1.22041	1.3176	1.30069	1.2785	1.35336	1.3394	1.27571	1.23636	1.15448	1.13633	1.19254	1.19227	1.26219	1.26624	1.26265	1.21935	1.21093	1.20375	1.20004	1.19467	1.19751	1.08466	1.06293	1.17887	1.12354	1.24008	1.25892
145	1.1619	1.20085	1.29132	1.29976	1.27146	1.10885	1.20715	1.22072	0.944511	0.916712	0.970959	1.15683	1.17407	1.11226	1.20653	1.29346	1.27415	1.2607	1.35312	1.28921	1.35209	1.24168	1.22767	1.16104	1.1213	1.08498	1.24416	1.289	1.37186	1.37156	1.48777	1.51267	1.57774	1.468	1.30888	1.34397	1.31186	1.3233	1.40321	1.43166	1.32973	1.20815	1.14544	1.31316	0.603232	0.521078	0.499195	0.745698	0.792529
146	0.569604	0.546272	0.490279	0.459893	0.443985	0.443841	0.415528	0.415978	0.415944	0.400584	0.41275	0.392254	0.398509	0.380425	0.412178	0.407523	0.376826	0.403092	0.391484	0.394787	0.391056	0.428609	0.416659	0.442622	0.412848	0.445441	0.458479	0.419271	0.434434	0.448321	0.456019	0.460672	0.450289	0.460912	0.481939	0.520639	0.571538	0.635948	0.639294	0.672489	0.703011	0.729374	0.751613	0.733384	0.779465	0.813072	0.906362	0.977569	1.01442
147	1.18573	1.30571	1.12637	1.15345	1.05722	1.16509	1.04748	1.21602	1.12762	1.11173	1.23836	1.25483	1.29897	1.21757	1.22798	1.23999	1.23521	1.28475	1.33857	1.38651	1.37419	1.19091	1.13527	1.15012	1.15083	1.10369	1.10022	1.28895	1.12534	1.12166	1.03577	0.595211	0.520004	0.720009	0.646602	0.66293	0.524621	0.448307	0.445735	0.394763	0.351219	0.346848	0.340867	0.347355	0.346598	0.334951	0.342852	0.339057	0.322201
148	1.23124	1.25961	1.30299	1.26504	1.24998	1.23499	1.19414	1.18996	1.20703	1.2268	1.25759	1.32923	1.35639	1.3606	1.34531	1.30207	1.22689	1.16037	1.23563	1.21284	1.20391	1.27568	1.17976	1.24926	1.30185	1.33073	1.27858	1.13302	1.15901	1.07469	1.22102	1.24008	1.23976	1.17084	1.25085	1.18357	1.03308	1.17603	1.29336	1.1443	1.11137	1.18437	1.14467	1.19566	1.04	0.922338	0.994906	1.19811	1.16786
149	1.02029	1.17959	1.18319	1.31978	1.25407	1.073	0.84301	0.801747	0.843377	0.867855	0.833001	0.98835	0.993087	1.09497	0.98619	0.959919	0.960272	1.07079	1.51202	1.53969	1.44035	1.37572	1.9416	1.789	1.39532	1.92952	1.33015	1.08096	1.05217	1.21351	1.23253	1.15291	1.11106	1.14787	1.16764	1.22383	1.20109	1.12467	1.13171	1.10591	1.11797	1.07407	1.14003	1.17234	1.33075	1.35016	1.31722	1.30148	1.35343
150	0.929811	1.0127	1.04911	1.04189	1.12141	1.06666	1.03701	1.06167	0.933519	0.951425	0.901243	0.902884	1.03193	1.06564	1.13517	1.07793	1.06121	1.05111	0.994096	0.897612	0.797647	0.953071	1.19286	1.08486	1.33564	1.29359	1.27137	1.16063	1.26333	1.11596	1.29005	1.38112	1.41921	1.36272	1.37009	1.42098	1.30561	1.34078	1.41441	1.25469	1.20195	1.29041	1.29988	1.3783	1.45183	1.3754	1.44529	1.37729	1.43789
151	0.542943	0.590332	0.624018	0.68672	0.688559	0.74516	0.783486	0.765169	0.816488	0.874325	0.881314	0.890818	0.969737	0.929384	0.941727	0.909429	0.986337	0.963097	1.07561	1.09282	1.05493	1.05761	1.0846	1.05603	1.0733	1.06886	1.14003	1.10295	1.13245	1.17952	1.20712	1.17714	1.24756	1.14345	1.1449	1.20528	1.20932	1.27605	1.2949	1.3508	1.33788	1.35235	1.18405	1.37066	1.32698	1.36268	1.39804	1.36062	1.33317
152	0.425535	0.433486	0.441721	0.418875	0.438691	0.431924	0.452758	0.446486	0.451888	0.484397	0.504789	0.549037	0.667579	0.768529	0.838075	0.83689	0.850052	0.8601	0.888919	0.904138	0.955655	0.986835	0.975656	1.05757	1.04918	1.07405	1.12746	1.29466	1.29048	1.34509	1.15339	1.24315	1.3223	1.26223	1.2888	1.15851	1.24832	1.25169	1.23708	1.31424	1.1403	1.23546	1.14071	1.27436	1.3578	1.35393	1.30073	1.15347	1.11065
153	1.31777	1.28939	1.31456	1.34474	1.33951	1.35313	1.36562	1.42708	1.51351	1.4496	1.51801	1.44139	1.49454	1.49436	1.48273	1.42653	1.49708	1.54181	1.59615	1.52126	1.55792	1.50116	1.47988	1.50032	1.5034	1.45814	1.53789	1.4728	1.39506	1.32049	1.32357	1.28833	1.31787	1.3574	1.29053	1.27486	1.26242	1.27777	1.22423	1.27367	1.14109	1.11971	0.910337	1.00462	1.06576	1.10368	1.06147	1.09023	1.13366
154	0.984378	1.04241	1.10476	1.15897	1.24151	1.30635	1.31871	1.29126	1.15792	1.15383	1.095	1.21868	1.3266	1.38892	1.48555	1.48694	1.45565	1.44305	1.36693	1.4641	1.44195	1.47483	1.47812	1.54829	1.44912	1.38651	1.38433	1.36605	1.36045	1.43465	1.42979	1.34232	1.48237	1.56094	1.49827	1.43396	1.43492	1.32112	1.4322	1.53815	1.49393	1.54835	1.52655	1.49064	1.47985	1.36214	1.43871	1.57599	1.56208
155	1.0113	0.989884	0.993399	1.07582	1.14175	1.20245	1.20339	1.25311	1.24724	1.26662	1.26431	1.29615	1.26066	1.21896	1.25871	1.27277	1.24504	1.2393	1.24985	1.22133	1.19863	1.1899	1.21707	1.13564	1.17499	1.21861	1.22201	1.28506	1.27603	1.28787	1.27355	1.20217	1.1968	1.21077	1.19488	1.25882	1.18571	1.30717	1.2961	1.24347	1.25814	1.24729	1.35583	1.39913	1.33513	1.29395	1.30046	1.32755	1.32103
156	1.1704	1.30156	1.10764	1.22099	1.3058	1.38485	1.35764	1.24374	1.30117	1.26003	1.32757	1.39116	1.40993	1.41929	1.37903	1.49357	1.48088	1.45782	1.46551	1.44132	1.50181	1.43173	1.50268	1.40082	1.49835	1.43544	1.39677	1.45969	1.38434	1.28365	1.27349	1.29404	1.35144	1.28247	1.40019	1.34048	1.2478	1.2669	1.39833	1.25442	1.36198	1.33104	1.22269	1.28086	0.68619	0.718116	0.723981	0.815135	0.770557
157	1.08123	1.1129	1.13035	1.12247	1.11956	1.16125	1.18923	1.14284	1.06957	1.06795	1.14859	1.11534	1.1319	1.20351	1.21208	1.11581	1.20703	1.18513	1.19029	1.16318	1.16482	1.17536	1.17259	1.23445	1.26165	1.25638	1.28411	1.21998	1.23454	1.27037	1.25285	1.33951	1.32768	1.26773	1.25825	1.08474	1.31182	1.38463	1.09984	1.1908	1.06828	1.29767	1.32384	1.30354	1.27417	1.33365	1.14482	1.26189	1.1674
158	0.515409	0.479222	0.461946	0.455022	0.429987	0.401905	0.395188	0.402639	0.390937	0.391929	0.392406	0.408024	0.410794	0.461316	0.586704	0.674704	0.712791	0.725398	0.815685	0.856555	0.906723	0.94037	0.991568	1.01189	0.994882	0.9556	1.0397	1.09256	1.09295	1.16358	1.20635	1.0531	1.11763	1.1512	1.08945	1.10649	1.1652	1.12823	1.12604	1.05549	1.06506	1.14608	1.19213	1.09945	1.14105	1.21885	1.27773	1.02214	1.03927
159	0.593933	0.624476	0.658323	0.65138	0.679554	0.704133	0.74369	0.749612	0.808471	0.821153	0.878143	0.908359	0.946338	0.999362	1.03064	1.08918	1.12384	1.1856	1.22934	1.27217	1.28868	1.3281	1.31552	1.25669	1.20285	1.1675	1.11339	1.2196	1.1612	1.12086	1.16475	1.04628	1.1031	1.11302	0.996445	1.07037	0.998694	1.0114	1.04372	1.12851	1.17617	1.18847	1.28497	1.0133	1.118	1.17084	1.28225	1.16685	1.26127
160	0.515409	0.479222	0.461946	0.455022	0.429987	0.401905	0.395188	0.402639	0.390937	0.391929	0.392406	0.408024	0.410794	0.461316	0.586704	0.674704	0.712791	0.725398	0.815685	0.856555	0.906723	0.94037	0.991568	1.01189	0.994882	0.9556	1.0397	1.09256	1.09295	1.16358	1.20635	1.0531	1.11763	1.1512	1.08945	1.10649	1.1652	1.12823	1.12604	1.05549	1.06506	1.14608	1.19213	1.09945	1.14105	1.21885	1.27773	1.02214	1.03927
161	0.683542	0.619267	0.610325	0.556105	0.555779	0.550529	0.571702	0.55626	0.569254	0.593319	0.574187	0.57549	0.620778	0.743192	0.83535	0.875961	0.926857	0.966653	1.04691	1.11336	1.14048	1.18359	1.22761	1.27006	1.27072	1.29072	1.24506	1.23477	1.26799	1.29624	1.33039	1.30785	1.23664	1.25177	1.25059	1.30966	1.21902	1.28259	1.26694	1.1696	0.981756	0.919534	0.967054	1.09295	1.16235	1.35315	1.35843	1.09511	1.12856
162	0.828373	0.925189	0.941469	0.957339	0.907435	0.927558	1.01207	1.10825	1.20752	1.22903	1.24213	1.16183	1.17019	1.2703	1.17207	1.21856	1.11998	1.1714	1.19247	1.24187	1.32638	1.25965	1.22744	1.37096	1.40921	1.47118	1.43083	1.57922	1.5747	1.51519	1.61358	1.78359	1.83326	1.91603	1.81897	1.82711	1.68165	1.84747	1.82793	1.70303	1.54069	1.44604	1.33352	1.48804	1.39836	1.3673	1.33852	1.2834	1.1436
163	0.640539	0.674683	0.638763	0.640525	0.61743	0.646148	0.626732	0.662881	0.712679	0.821582	0.890368	0.90972	0.94827	0.988472	1.02584	1.03931	1.09491	1.17347	1.21133	1.23137	1.28515	1.16368	1.19309	1.08053	1.1768	1.1315	1.0134	1.13618	1.11679	1.09167	1.12319	1.20681	1.21325	1.10024	1.1477	1.17751	1.19919	1.15835	1.11575	1.09715	1.26375	1.34444	1.38969	1.44539	1.40871	1.2951	1.28546	1.33613	1.3016
164	1.06416	1.12919	1.14738	1.11227	1.07854	1.07179	1.04696	1.02034	1.00502	0.977472	0.977982	1.05649	1.08388	1.12381	1.04489	1.14654	1.08376	1.10433	1.07395	1.04864	1.15704	1.25623	1.23737	1.20378	1.28354	1.25516	1.30029	1.29107	1.37295	1.27492	1.37027	1.37539	1.44256	1.43809	1.44281	1.45123	1.3737	1.36222	1.37842	1.40052	1.26833	1.2104	1.27285	1.24226	1.26096	1.27847	1.27798	1.3795	1.36997
165	1.13147	1.23695	1.42498	1.38668	1.07505	1.10351	1.4335	1.36426	1.40558	1.28825	1.10259	1.198	1.43674	1.51561	1.30798	1.33217	1.27933	0.845464	0.824752	0.807573	0.779189	0.816712	0.816262	0.694654	0.682117	0.666093	0.672024	0.754311	0.801651	0.828888	0.873034	0.895727	0.910153	0.897425	0.908496	0.974117	1.03961	1.01432	1.07492	0.997311	0.995166	1.05602	1.12957	1.17936	1.19041	1.20928	1.26198	1.28603	1.36307
166	0.425741	0.431256	0.448469	0.491237	0.524871	0.570856	0.602714	0.652054	0.711804	0.73854	0.801135	0.864413	0.900829	0.960844	1.02438	1.07518	1.15093	1.15556	1.24949	1.26213	1.26858	1.26247	1.19362	1.27059	1.17828	1.11439	1.15358	1.07338	1.16247	1.04914	1.06433	1.03895	1.06495	1.07796	1.17036	1.21995	1.271	1.22038	1.21026	1.27673	1.21102	1.11854	1.28364	1.19549	1.14318	1.17593	1.17863	1.1758	1.2122
167	1.23063	1.3126	1.35416	1.25998	1.28886	1.26406	1.29669	1.29423	1.38502	1.31577	1.3754	1.32778	1.37521	1.37957	1.39415	1.30384	1.34481	1.29297	1.37716	1.42259	1.3162	1.37372	1.38946	1.38262	1.25094	1.25975	1.28737	1.34197	1.24844	1.24835	1.29192	1.3364	1.36265	1.43625	1.24138	1.22652	1.33787	1.32689	1.35894	1.46891	1.36246	1.37494	0.708488	0.780508	0.825632	0.726171	0.639537	0.544033	0.438167
168	1.50554	1.4576	1.46764	1.56941	1.48192	1.32263	1.3361	1.35768	1.36317	1.32699	1.33424	1.35526	1.33929	1.32081	1.27357	1.31222	1.33114	1.39985	1.41104	1.39467	1.44543	1.39185	1.3395	1.40734	1.47778	1.45696	1.36001	1.28412	1.30156	1.33767	1.45721	1.49248	1.52684	1.45619	1.48301	1.46093	1.42847	1.35703	1.39178	1.32926	1.27898	1.22678	1.18056	1.19556	1.21637	1.22512	1.246	1.26248	1.21749
169	1.2441	1.30729	1.38308	1.35992	1.35424	1.40346	1.33883	1.33791	1.37025	1.23594	1.26918	1.35029	1.3088	1.29942	1.52798	1.44651	1.26444	1.21843	1.28741	1.37779	1.41555	1.52452	1.53104	1.36448	1.38795	1.24356	1.21209	0.965785	1.15603	1.17504	1.1238	1.18705	1.01219	1.32145	1.32457	1.15212	1.2139	0.976399	0.662073	0.649512	0.610456	0.533077	0.541688	0.509125	0.549942	0.491478	0.484235	0.464178	0.459169
170	1.15733	1.13039	1.16207	1.11047	1.12153	1.14005	1.20528	1.18539	1.16207	1.18455	1.21212	1.13642	1.27402	1.26266	1.27038	1.25085	1.19338	1.29904	1.31371	1.39423	1.37062	1.30269	1.44182	1.48789	1.38133	1.46161	1.53635	1.51371	1.49211	1.48617	1.46807	1.53064	1.5131	1.52455	1.55315	1.60339	1.6488	1.73182	1.8748	1.85221	1.75318	1.69298	1.79951	1.67718	1.64471	1.5521	1.59305	1.53737	1.52718
171	1.20228	1.22846	1.18426	1.2293	1.28551	1.23355	1.36033	1.2971	1.33899	1.27765	1.20153	1.28962	1.30234	1.26059	1.26192	1.2725	1.33589	1.45998	1.3788	1.45065	1.40396	1.45367	1.38406	1.34365	1.39177	1.30255	1.19956	1.23003	1.12446	1.1543	1.12679	1.19966	1.27683	1.1855	1.24138	1.20636	1.13913	0.714067	0.567733	0.735424	0.727453	0.738884	0.569683	0.557012	0.455539	0.463564	0.475865	0.473938	0.490179
172	1.20641	1.21192	1.25274	1.20777	1.20191	1.23622	1.22596	1.2851	1.34047	1.36916	1.41144	1.4183	1.37964	1.33901	1.34624	1.11411	1.45626	0.641531	0.635421	0.761445	0.719438	0.762562	0.699723	0.607972	0.562457	0.506863	0.477271	0.446046	0.438378	0.448709	0.422759	0.435928	0.452723	0.439942	0.428385	0.428592	0.448191	0.430574	0.40902	0.429105	0.422048	0.397082	0.371099	0.377286	0.403598	0.377159	0.399795	0.388463	0.382049
173	0.652836	0.708591	0.725132	0.744969	0.773684	0.808452	0.853567	0.835758	0.86506	0.970459	1.01985	1.07851	1.22388	1.26989	1.19525	1.14493	1.17534	1.2517	1.22099	1.19034	1.22655	1.23256	1.22851	1.24341	1.2822	1.21522	1.21314	1.33968	1.35447	1.26657	1.19503	1.22626	1.03215	1.00515	1.10065	1.12379	1.31153	1.30972	1.30567	1.09055	0.997056	1.04882	1.18834	1.28168	1.24957	1.2916	1.32263	1.23399	1.35623
174	0.518748	0.547736	0.620637	0.578547	0.645168	0.66347	0.696339	0.674754	0.721889	0.721925	0.724859	0.789776	0.746876	0.78465	0.818224	0.826879	0.868129	0.884538	0.961486	1.03238	0.981387	1.03465	1.05339	1.02851	1.00038	1.00368	0.991824	0.963195	1.02654	0.998847	0.984111	0.950386	0.938333	0.950332	0.98927	0.977913	0.984509	0.953458	1.0212	1.04999	1.03377	0.984895	0.993172	0.982959	0.976844	1.01722	1.10628	1.10492	1.02322
175	0.421456	0.419656	0.410963	0.396386	0.388613	0.409311	0.455667	0.504539	0.557363	0.666822	0.785103	0.812036	0.92707	0.952589	0.994449	1.13746	1.26907	1.23674	1.42154	1.35557	1.24258	1.14651	1.21222	1.16953	1.20115	1.17098	1.16144	1.18813	1.17901	1.13958	1.13021	1.14003	1.04286	1.06708	1.13248	1.09992	1.10506	1.07953	1.12381	1.06367	1.0787	1.03694	1.02556	1.15665	1.18305	0.940394	0.901487	1.0034	1.08041
176	0.744178	0.734617	0.840866	0.870934	0.892663	0.952256	0.980213	1.01971	1.02594	0.993752	0.955681	0.959869	1.01932	0.99173	0.979549	0.978787	1.02026	1.00429	1.03826	1.12073	1.14151	1.04612	1.06722	1.13112	1.00588	1.12562	1.13545	1.06076	1.03999	1.03822	1.12252	1.15523	1.13867	1.12848	1.2834	1.22152	1.29359	1.29281	1.24979	1.23411	1.1204	1.10732	1.18752	1.25993	1.22061	1.237	1.26678	1.12986	1.09503
177	0.929811	1.0127	1.04911	1.04189	1.12141	1.06666	1.03701	1.06167	0.933519	0.951425	0.901243	0.902884	1.03193	1.06564	1.13517	1.07793	1.06121	1.05111	0.994096	0.897612	0.797647	0.953071	1.19286	1.08486	1.33564	1.29359	1.27137	1.16063	1.26333	1.11596	1.29005	1.38112	1.41921	1.36272	1.37009	1.42098	1.30561	1.34078	1.41441	1.25469	1.20195	1.29041	1.29988	1.3783	1.45183	1.3754	1.44529	1.37729	1.43789
178	1.03068	1.10319	1.14403	1.12825	1.16363	1.20351	1.24969	1.15312	1.17451	1.2098	1.10388	1.02297	1.11785	1.13428	0.972027	1.07106	1.06049	1.15747	1.25697	1.19068	1.37707	1.32734	1.33192	1.33229	1.29849	1.35077	1.36927	1.34086	1.33397	1.32791	1.32233	1.35078	1.38979	1.42774	1.46808	1.27179	0.848813	1.13207	1.19034	1.31363	1.24085	1.20261	1.29818	1.42951	1.40452	1.31342	1.37486	1.36471	1.38112
179	1.14669	1.17233	1.11902	1.14043	1.14591	1.12819	1.17784	1.19487	1.1901	1.13502	1.20837	1.15367	1.18776	1.27919	1.2131	1.1867	1.19595	1.20931	1.35482	1.38202	1.39886	1.45219	1.47414	1.38643	1.35923	1.32685	1.32109	1.33859	1.30852	1.22805	1.23306	1.21307	1.30032	1.45802	1.40966	1.4052	1.46676	1.41687	1.35632	1.3781	1.37768	1.28776	1.3304	1.35681	1.35547	0.663412	0.491387	0.608806	0.742758
180	1.4478	1.4345	1.41895	1.34773	1.29362	1.2339	1.36106	1.32095	1.38508	1.36992	1.43128	1.4217	1.42088	1.41293	1.45865	1.44651	1.4827	1.53028	1.51614	1.48097	1.40522	1.47555	1.43963	1.44963	1.43006	1.52569	1.56836	1.52536	1.58246	1.56735	1.55495	1.51914	1.48731	1.44957	1.4656	1.52234	1.49138	1.41851	1.33262	1.24312	1.22642	1.26376	1.20052	1.17204	1.20807	1.25181	1.26368	1.36351	1.39751
181	1.14431	1.1789	1.19208	1.17239	1.23479	1.2305	1.23684	1.20693	1.24265	1.24094	1.2065	1.19236	1.23479	1.23319	1.24965	1.15838	1.17225	1.19712	1.21103	1.19459	1.2169	1.17823	1.1838	1.21144	1.17093	1.18801	1.16049	1.2861	1.29432	1.33546	1.40757	1.40969	1.41026	1.25464	1.32322	1.27749	1.36599	1.36082	1.42787	1.45963	1.25465	1.43873	1.46901	1.5009	1.41145	1.2702	1.27231	1.30071	1.30626
182	0.873485	0.911911	0.938604	0.988631	1.01658	1.07639	1.11312	1.15807	1.13053	1.1565	1.19747	1.188	1.2329	1.32094	1.32334	1.29859	1.35379	1.35943	1.32376	1.34563	1.23739	1.28722	1.23618	1.27413	1.28473	1.41045	1.35853	1.31106	1.28799	1.2962	1.34337	1.3459	1.39253	1.33166	1.4029	1.39004	1.38816	1.30682	1.27935	1.40923	1.41312	1.45279	1.44985	1.17906	1.2927	1.40515	1.48467	1.49504	1.50429
183	1.43184	1.34915	1.38024	1.39722	1.4177	1.48043	1.50243	1.41386	1.48744	1.45393	1.52873	1.50992	1.38519	1.43231	1.3244	1.42841	1.37786	1.47709	1.45033	1.39374	1.42925	1.48757	1.31141	1.10925	1.24982	1.34929	1.33261	1.1256	1.20766	1.23068	1.201	1.13874	0.86275	1.05272	1.15928	1.21245	1.03783	1.07172	0.876619	0.898627	0.744998	1.02714	1.16063	1.09281	1.17618	1.2171	1.25818	1.16926	1.00309
184	0.735599	0.731647	0.832895	0.87947	0.936768	1.01571	1.0437	1.00702	1.03607	1.02973	1.02833	1.11878	1.10271	1.07672	1.11483	1.16485	1.08398	1.27207	1.26567	1.20376	1.21809	1.26718	1.2176	1.2864	1.25044	1.24985	1.22934	1.29571	1.37107	1.29252	1.18209	1.28319	1.26096	1.33673	1.28687	1.33685	1.24058	1.29297	1.24211	1.26857	1.30024	1.43886	1.46174	1.44601	1.47011	1.24769	1.34014	1.39303	1.36752
185	1.08143	1.04649	1.0279	1.18134	1.27045	1.35115	1.39885	1.35353	1.34	1.34059	1.25464	1.14233	1.11792	1.05604	1.07068	1.15549	1.0271	1.24504	1.36729	1.14259	1.21472	1.31179	1.33253	1.38924	1.3343	0.96376	0.659651	0.536881	0.666135	0.464393	0.478861	0.456776	0.506991	0.458125	0.446138	0.49137	0.442819	0.471493	0.445771	0.494953	0.446714	0.543338	0.643993	0.613164	0.656931	0.676398	0.807908	0.842142	0.89325
186	1.24747	1.31224	1.25593	1.37968	1.51484	1.47019	1.44854	1.40964	1.3574	1.3278	1.33142	1.28751	1.34408	1.37316	1.35505	1.49587	1.49047	1.45896	1.45577	1.46824	1.47377	1.40324	1.4168	1.44343	1.47592	1.51906	1.45985	1.49372	1.43216	1.44178	1.51774	1.45367	1.49562	1.5325	1.54921	1.56444	1.59795	1.7316	1.80891	1.76885	1.51094	1.4617	1.37879	1.38067	1.44473	1.47254	1.52056	1.54066	1.49574
187	1.4478	1.4345	1.41895	1.34773	1.29362	1.2339	1.36106	1.32095	1.38508	1.36992	1.43128	1.4217	1.42088	1.41293	1.45865	1.44651	1.4827	1.53028	1.51614	1.48097	1.40522	1.47555	1.43963	1.44963	1.43006	1.52569	1.56836	1.52536	1.58246	1.56735	1.55495	1.51914	1.48731	1.44957	1.4656	1.52234	1.49138	1.41851	1.33262	1.24312	1.22642	1.26376	1.20052	1.17204	1.20807	1.25181	1.26368	1.36351	1.39751
188	0.35182	0.336297	0.341678	0.322472	0.349519	0.345208	0.347357	0.34605	0.321652	0.3309	0.331021	0.342448	0.338741	0.364632	0.367883	0.371173	0.391445	0.393132	0.378696	0.389593	0.372391	0.400305	0.417196	0.453028	0.533171	0.532877	0.592457	0.601163	0.612471	0.674045	0.716373	0.753108	0.779198	0.889147	0.919512	0.920109	0.892924	0.86756	0.765469	0.783273	0.864314	0.874178	0.885998	0.850419	0.953257	0.823188	0.965845	0.88088	0.954505
189	0.425741	0.431256	0.448469	0.491237	0.524871	0.570856	0.602714	0.652054	0.711804	0.73854	0.801135	0.864413	0.900829	0.960844	1.02438	1.07518	1.15093	1.15556	1.24949	1.26213	1.26858	1.26247	1.19362	1.27059	1.17828	1.11439	1.15358	1.07338	1.16247	1.04914	1.06433	1.03895	1.06495	1.07796	1.17036	1.21995	1.271	1.22038	1.21026	1.27673	1.21102	1.11854	1.28364	1.19549	1.14318	1.17593	1.17863	1.1758	1.2122
190	0.312907	0.313801	0.305878	0.304084	0.30131	0.288569	0.299702	0.30411	0.296327	0.317255	0.307498	0.321406	0.32547	0.348697	0.345368	0.358127	0.389222	0.40735	0.440453	0.476621	0.507789	0.568468	0.601485	0.651622	0.669766	0.781358	0.759423	0.828096	0.829399	0.838209	0.877698	0.911663	0.818791	0.76157	0.756937	0.813774	0.822254	0.942542	0.900559	0.918836	1.0193	1.01785	1.04967	0.981103	1.00166	1.01579	1.02459	1.04385	1.04258
191	0.997327	1.03538	1.11082	1.14322	1.14015	1.08896	1.1737	1.22041	1.20306	1.16367	1.23942	1.19181	1.2565	1.27806	1.18918	1.10669	1.14088	1.16087	1.22827	1.27011	1.28766	1.31746	1.3675	1.35219	1.39658	1.3968	1.39417	1.36979	1.38108	1.30698	1.31981	1.34562	1.32613	1.22885	1.35568	1.36531	1.35995	1.35169	1.37299	1.42286	1.33844	1.30543	1.32403	1.36037	1.29894	1.28492	1.44059	0.690802	0.77188
192	0.873485	0.911911	0.938604	0.988631	1.01658	1.07639	1.11312	1.15807	1.13053	1.1565	1.19747	1.188	1.2329	1.32094	1.32334	1.29859	1.35379	1.35943	1.32376	1.34563	1.23739	1.28722	1.23618	1.27413	1.28473	1.41045	1.35853	1.31106	1.28799	1.2962	1.34337	1.3459	1.39253	1.33166	1.4029	1.39004	1.38816	1.30682	1.27935	1.40923	1.41312	1.45279	1.44985	1.17906	1.2927	1.40515	1.48467	1.49504	1.50429
193	1.16751	1.18117	1.22752	1.18893	1.21198	1.16625	1.20548	1.2317	1.22374	1.30239	1.33741	1.27717	1.26144	1.28125	1.32609	1.3732	1.36262	1.33956	1.35008	1.36675	1.34721	1.37783	1.34842	1.47352		1.41034	1.45674	1.3953	1.31973	1.29384	1.2549	1.28941	1.29202	1.20084	1.21833	1.19919	1.2534	1.28077	1.25029	1.2309	1.29385	1.30762	1.30231	1.28288	1.2937	1.23262	1.22376	1.25271	1.31723
194	1.03068	1.10319	1.14403	1.12825	1.16363	1.20351	1.24969	1.15312	1.17451	1.2098	1.10388	1.02297	1.11785	1.13428	0.972027	1.07106	1.06049	1.15747	1.25697	1.19068	1.37707	1.32734	1.33192	1.33229	1.29849	1.35077	1.36927	1.34086	1.33397	1.32791	1.32233	1.35078	1.38979	1.42774	1.46808	1.27179	0.848813	1.13207	1.19034	1.31363	1.24085	1.20261	1.29818	1.42951	1.40452	1.31342	1.37486	1.36471	1.38112
195	1.08521	1.23333	1.17797	1.19125	1.19171	1.21506	1.09698	1.00429	1.16851	1.10532	1.18385	1.27853	1.23973	1.15457	1.14351	1.28539	1.25424	1.31892	1.26817	1.19242	1.26372	1.25503	1.22324	1.24458	1.29291	1.25641	1.36899	1.34998	1.29783	1.25111	1.27913	1.30137	0.729262	0.62825	0.52746	0.806359	0.659643	0.463671	0.445465	0.438973	0.390107	0.385391	0.383786	0.391806	0.388879	0.389909	0.406082	0.402277	0.414085
196	1.32187	1.34577	1.18442	1.35299	1.39145	1.3986	1.30651	1.31819	1.31952	1.30905	1.32295	1.34103	1.30333	1.37881	1.26263	1.24001	1.18376	1.15951	1.09039	1.14936	1.17669	1.26065	1.31914	1.37745	1.27613	1.31582	1.26199	1.36489	1.36822	1.35595	1.38661	1.4008	1.38715	0.734714	0.648056	0.661984	0.80767	0.748703	0.572239	0.497669	0.704182	0.710375	0.643166	0.610394	0.59107	0.578921	0.605963	0.733146	0.713892
197	1.09456	1.0866	1.10746	1.1034	1.10798	1.12687	1.08759	1.10631	1.11193	1.09368	1.13019	1.12199	1.13786	1.14506	1.13108	1.15427	1.13739	1.13402	1.13745	1.12343	1.11306	1.1414	1.2415	1.23985	1.23694	1.28886	1.25843	1.29256	1.31214	1.32651	1.25337	1.32658	1.38959	1.33607	1.38277	1.38123	1.32075	1.34152	1.32773	1.28501	1.31433	1.29965	1.26881	1.31505	1.29387	1.30287	1.37742	1.32408	1.33748
198	0.953134	0.959874	1.00395	1.0312	1.05353	1.10775	1.18148	1.21362	1.24254	1.29938	1.33186	1.31303	1.29588	1.2101	1.26849	1.32346	1.24141	1.25294	1.36619	1.33084	1.29891	1.38787	1.37639	1.28804	1.32221	1.35802	1.39551	1.34862	1.36885	1.31986	1.37179	1.42324	1.39469	1.32997	1.31173	1.31225	1.34328	1.20031	1.35291	1.40808	1.36492	1.32886	1.29353	1.24564	1.23664	1.28833	1.31127	1.30831	1.36187
199	0.591615	0.588457		0.613903	0.632059	0.571141	0.603644	0.596895	0.616525	0.562901	0.575736	0.572028	0.57079	0.586599	0.549918	0.58246	0.583091	0.571766	0.560827	0.623789	0.650955	0.674896	0.682556	0.620941	0.619492	0.606357	0.619119	0.65188	0.681912	0.674436	0.678413	0.688534	0.70224	0.690779	0.739763	0.801654	0.723313	0.74632	0.749896	0.770233	0.769396	0.889753	0.890591	0.913005	0.924058	0.981601	1.10733	1.14296	1.21922
200	0.778464	0.796501	0.823638	0.872131	0.871714	0.925039	0.912681	0.899741	0.913828	0.922032	0.953813	0.939349	0.969452	0.910501	1.06782	1.08255	1.12181	1.05794	1.14307	1.04212	1.13938	1.15054	1.05867	1.04887	0.98664	1.07634	1.02886	0.935552	1.00208	0.940837	0.92271	0.99763	0.983988	0.988857	0.980077	1.07043	1.11942	1.10234	1.18481	1.165	1.06967	1.01087	1.03275	0.980221	1.10043	1.05625	1.16469	1.27264	1.23838
201	0.32027	0.330247	0.329591	0.348307	0.341657	0.347035	0.354597	0.347243	0.349836	0.344878	0.342425	0.350202	0.360449	0.338735	0.337518	0.332967	0.351096	0.356219	0.361838	0.364597	0.352475	0.372947	0.396556	0.425562	0.468231	0.495095	0.503934	0.487981	0.44998	0.423681	0.398912	0.405201	0.409113	0.388749	0.370338	0.35877	0.341126	0.366591	0.382747	0.396802	0.450554	0.49484	0.544577	0.552084	0.570785	0.631881	0.691236	0.72078	0.744226
202	1.22457	1.0849	1.08874	1.12274	1.09593	1.02447	1.09824	1.06748	1.13156	1.2194	1.24774	1.33105	1.32925	1.22842	1.20191	1.30615	1.19084	1.24893	1.19464	1.20743	1.29157	1.12984	1.1936	1.26453	1.26271	1.29656	1.32403	1.40515	1.36489	1.43669	1.34235	1.30389	1.31263	1.18481	1.26416	1.46695	1.51235	1.49337	1.47049	1.36813	1.24874	0.811956	0.847656	0.830375	0.762891	0.625327	0.680211	0.615394	0.515791
203	1.21012	1.28799	1.39309	1.3242	1.30133	1.37509	1.40881	1.40802	1.39869	1.43386	1.4085	1.32222	1.28634	1.38321	1.44336	1.46708	1.46667	1.4286	1.46772	1.43007	1.41274	1.37713	1.41055	1.39898	1.45338	1.38835	1.46429	1.43559	1.42193	1.28863	1.36453	1.35115	1.37211	1.45973	1.48286	1.49257	1.47773	1.48732	1.54823	1.54038	1.38037	1.34873	1.44528	0.646827	0.699278	0.554593	0.613744	0.755183	0.696246
204	1.13747	1.0882	1.10983	1.1865	1.1982	1.18294	1.20261	1.15081	1.17863	1.15483	1.1319	1.10666	1.12439	1.13868	1.0664	1.0488	1.05652	1.11185	1.08713	1.06947	1.12883	1.11964	1.12788	1.13641	1.14308	1.14725	0.966717	1.11658	1.16668	1.19524	1.09181	1.16101	1.13103	1.29367	1.23264	1.25033	1.18623	1.27328	1.1959	1.03994	1.21762	1.20077	1.20743	1.26051	1.18449	1.13786	1.34763	1.24934	1.31102
205	0.46522	0.471516	0.484383	0.484558	0.472508	0.470552	0.461276	0.456618	0.45102	0.4547	0.465239	0.457223	0.45698	0.451072	0.460418	0.46415	0.46697	0.467519	0.445724	0.460768	0.485845	0.479772	0.470603	0.461669	0.470258	0.479223	0.468603	0.466138	0.487081	0.48061	0.476807	0.482343	0.488791	0.48599	0.479162	0.500325	0.490158	0.495514	0.520859	0.523585	0.547025	0.613639	0.700263	0.781583	0.775645	0.771418	0.801712	0.815737	0.822543
206	0.995902	1.07877	1.03607	1.07636	1.1129	1.19345	1.22761	1.20054	1.2021	1.22415	1.25823	1.24154	1.33598	1.39794	1.42767	1.40519	1.41406	1.47443	1.45049	1.39116	1.40143	1.38418	1.38559	1.43235	1.43867	1.37055	1.40138	1.43253	1.35078	1.32679	1.30696	1.37309	1.33031	1.37173	1.40139	1.39264	1.3725	1.40195	1.33582	1.42786	1.37952	1.39106	1.38518	1.45272	1.37481	1.37303	1.42801	1.37912	1.45905
207	0.736721	0.789076	0.817091	0.838317	0.894903	0.935063	0.967547	0.881953	0.928457	0.986193	1.00331	0.999445	1.06564	1.13708	1.15262	1.16237	1.20728	1.12702	1.28199	1.36013	1.30592	1.1725	1.13751	1.17603	1.1969	1.27937	1.2116	1.28359	1.28197	1.23453	1.30343	1.33817	1.38644	1.52942	1.5709	1.58786	1.49364	1.41728	1.4079	1.48105	1.18122	1.13777	1.30043	1.19855	1.4032	1.48991	1.38342	1.44762	1.36813
208	1.0424	1.06079	1.10236	1.10461	1.08925	1.14043	1.10742	1.08515	1.15473	1.14579	1.10419	1.14655	1.12708	1.16831	1.19808	1.18438	1.13455	1.08993	1.11177	1.08985	1.09966	1.07978	1.04593	1.1222	1.08984	1.09335	1.13431	1.08697	1.05506	1.1261	1.19734	1.22788	1.18989	1.35008	1.40231	1.31252	1.29448	1.49381	1.43489	1.34462	1.22951	1.45857	1.48482	1.47759	1.40992	1.54331	1.57287	1.34511	1.51184
209	1.43184	1.34915	1.38024	1.39722	1.4177	1.48043	1.50243	1.41386	1.48744	1.45393	1.52873	1.50992	1.38519	1.43231	1.3244	1.42841	1.37786	1.47709	1.45033	1.39374	1.42925	1.48757	1.31141	1.10925	1.24982	1.34929	1.33261	1.1256	1.20766	1.23068	1.201	1.13874	0.86275	1.05272	1.15928	1.21245	1.03783	1.07172	0.876619	0.898627	0.744998	1.02714	1.16063	1.09281	1.17618	1.2171	1.25818	1.16926	1.00309
210	0.611057	0.62279	0.685886	0.666238	0.639777	0.660255	0.736371	0.779346	0.789431	0.822927	0.843246	0.929724	1.01708	1.01416	1.10778	1.17055	1.17462	1.14783	1.12257	1.1319	1.18447	1.12675	1.14511	1.2458	1.25225	1.23416	1.29976	1.31564	1.34152	1.40885	1.44004	1.37808	1.28554	1.28661	1.27844	1.24434	1.27511	1.29517	1.37639	1.29127	1.38895	1.39284	1.38764	1.39755	1.34377	1.34052	1.41982	1.34815	1.28459
211	1.09207	1.17215	1.28374	1.27053	1.2774	1.25736	1.35737	1.37422	1.45376	1.30109	1.32214	1.37543	1.42221	1.43718	1.42238	1.40268	1.39969	1.16608	1.14816	1.14917	1.26326	1.25607	1.11227	1.19045	1.16456	1.17306	1.14277	1.23597	1.23615	1.29655	1.28551	1.36685	1.37769	1.25107	1.36348	1.46249	1.21781	1.19113	0.984227	0.452848	0.546058	0.593228	0.72846	0.749226	0.739966	0.631843	0.652362	0.607166	0.610786
212	0.377042	0.378688	0.389107	0.399559	0.39054	0.397828	0.372457	0.372889	0.38369	0.383739	0.391604	0.38211	0.377186	0.372803	0.325293	0.351019	0.371435	0.370909	0.362502	0.384658	0.363058	0.395528	0.405213	0.412901	0.423492	0.426657	0.431324	0.473626	0.507155	0.529446	0.538582	0.542077	0.53705	0.654776	0.528624	0.614141	0.671796	0.750266	0.830998	0.900662	0.897255	0.905087	0.948752	0.943773	0.980441	1.05164	1.14967	1.24711	1.21983
213	0.828373	0.925189	0.941469	0.957339	0.907435	0.927558	1.01207	1.10825	1.20752	1.22903	1.24213	1.16183	1.17019	1.2703	1.17207	1.21856	1.11998	1.1714	1.19247	1.24187	1.32638	1.25965	1.22744	1.37096	1.40921	1.47118	1.43083	1.57922	1.5747	1.51519	1.61358	1.78359	1.83326	1.91603	1.81897	1.82711	1.68165	1.84747	1.82793	1.70303	1.54069	1.44604	1.33352	1.48804	1.39836	1.3673	1.33852	1.2834	1.1436
214	0.949407	0.993936	0.964806	1.07587	1.05041	1.09187	1.04414	1.01671	1.0446	1.03514	1.08305	1.08444	1.11999	1.09886	1.14589	1.13839	1.18432	1.14241	1.16519	1.07493	1.17342	1.18628	1.25258	1.28783	1.20866	1.19971	1.12493	1.13382	1.1991	1.23309	1.25699	1.30139	1.28186	1.26173	1.19468	1.18214	1.19235	1.21109	1.28404	1.36297	1.35029	1.36992	1.36963	1.18929	0.891672	0.976397	1.27933	1.47656	1.50979
215	1.19539	1.26293	1.20391	1.27666	1.14692	1.16096	1.26024	1.28684	1.21966	1.23341	1.30503	1.30739	1.20954	1.31054	1.27915	1.27895	1.28549	1.1785	1.27882	1.29192	1.23353	1.06882	1.07653	1.1419	1.15608	1.07463	1.02543	0.959094	0.980035	1.04453	1.16555	1.10142	1.29138	1.31059	1.15899	1.1576	1.18802	1.30321	1.1542	1.18932	1.19766	1.2625	1.34038	1.21757	1.26913	1.3338	1.28223	1.20302	1.29189
216	0.581801	0.824591	0.850415	0.84819		1.22404		1.23772		1.27802	1.28394	1.32153	1.26973	1.31168	1.39635	1.40991	1.38625	1.31788		1.26239	1.30045	1.27837	1.22778	1.22661	1.23557	1.27434	1.30179	1.35508	1.38933	1.37024	1.37233	1.32276	1.39262	1.3754	1.41305	1.50551	1.49958	1.41681	1.49838	1.41352	1.36253	1.37539	1.28083	1.13974	1.29639	1.16091	1.2239	1.21487	1.26731
217	1.27342	1.41323	1.41985	1.36546	1.33026	1.26971	1.30606	1.27414	1.24106	1.25174	1.31093	1.42799	1.42744	1.42261	1.38345	1.43516	1.37269	1.32443	1.23461	1.35894	1.10833	1.257	1.29998	1.20619	1.18736	1.1558	1.26406	1.33439	1.35288	1.34358	1.35889	1.32618	1.13306	1.19891	1.17552	1.23711	1.36791	1.17105	1.18861	1.23294	1.358	1.48096	1.42285	1.45697	1.33512	0.683749	0.6914	0.603278	0.769577
218	0.744178	0.734617	0.840866	0.870934	0.892663	0.952256	0.980213	1.01971	1.02594	0.993752	0.955681	0.959869	1.01932	0.99173	0.979549	0.978787	1.02026	1.00429	1.03826	1.12073	1.14151	1.04612	1.06722	1.13112	1.00588	1.12562	1.13545	1.06076	1.03999	1.03822	1.12252	1.15523	1.13867	1.12848	1.2834	1.22152	1.29359	1.29281	1.24979	1.23411	1.1204	1.10732	1.18752	1.25993	1.22061	1.237	1.26678	1.12986	1.09503
219	1.34246	1.32152	1.34454	1.32332	1.3525	1.33803	1.3555	1.36936	1.31361	1.31395	1.39759	1.39343	1.42003	1.51175	1.46091	1.47408	1.45107	1.3824	1.41982	1.39197	1.417	1.42894	1.42578	1.44548	1.48176	1.45569	1.45233	1.46873	1.43057	1.44227	1.42638	1.38169	1.3405	0.669046	0.67261	0.59825	0.854856	0.803131	0.753386	0.657318	0.533842	0.517764	0.482444	0.449503	0.442809	0.420288	0.42036	0.410951	0.414913
220	0.408305	0.428124	0.456266	0.476675	0.428921	0.412609	0.398948	0.395567	0.387869	0.382934	0.356887	0.350573	0.368695	0.359059	0.376799	0.385155	0.376528	0.391789	0.397076	0.414899	0.417435	0.439454	0.477062	0.521444	0.579267	0.657737	0.682903	0.768464	0.811782	0.81394	0.843746	0.920893	0.947837	0.986409	1.05574	1.08765	1.14021	1.13673	1.17778	1.26754	1.21009	1.20868	1.20222	1.17961	1.31794	1.16679	1.0456	1.08075	1.11038
221	0.645389	0.741036	0.771297	0.76164	0.743416	0.780681	0.843274	0.874606	0.876517	0.883774	0.94075	0.984564	0.978002	1.02755	1.01615	1.00586	1.04566	1.01982	0.958733	1.23869	1.14386	1.17698	1.2794	1.26897	1.23851	1.31458	1.30662	1.31711	1.30619	1.31824	1.25012	1.14034	1.1296	1.31025	1.41073	1.37043	1.22872	1.24377	1.36868	1.41136	1.26834	1.33542	1.38369	1.27827	1.32965	1.40959	1.35006	1.3796	0.720558
222	0.377042	0.378688	0.389107	0.399559	0.39054	0.397828	0.372457	0.372889	0.38369	0.383739	0.391604	0.38211	0.377186	0.372803	0.325293	0.351019	0.371435	0.370909	0.362502	0.384658	0.363058	0.395528	0.405213	0.412901	0.423492	0.426657	0.431324	0.473626	0.507155	0.529446	0.538582	0.542077	0.53705	0.654776	0.528624	0.614141	0.671796	0.750266	0.830998	0.900662	0.897255	0.905087	0.948752	0.943773	0.980441	1.05164	1.14967	1.24711	1.21983
223	0.892062	1.01207	1.02564	0.957699	1.05036	1.04262	1.14272	0.952241	0.968398	1.21631	1.11362	1.07311	1.12947	1.17513	1.14138	1.01972	1.31003	1.0083	0.88385	1.03869	1.29845	1.30308	1.30559	1.2984	1.13025	1.05477	1.34805	1.34275	1.15944	1.22236	1.08669	1.24048	1.22858	1.12782	1.09023	1.23753	1.21098	1.27456	1.02107	1.31649	1.38856	1.09098	1.08715	1.38767	1.30337	1.06056	1.26702	1.39082	0.768514
224	0.971948	1.13919	1.12918	1.16622	1.07556	1.16933	1.10533	1.05777	1.11315	1.07887	1.17015	1.09177	1.18697	1.27081	1.19547	1.24701	1.23497	1.38037	1.23692	1.37597	1.44232	1.30287	1.32589	1.38363	1.31055	1.41685	1.47043	1.45368	0.692583	0.680723	0.86827	0.811352	0.78636	0.6335	0.541197	0.504641	0.484822	0.554791	0.599563	0.660972	0.617569	0.634938	0.67339	0.762936	0.781597	0.819591	0.933658	0.998464	1.08253
225	0.924625	0.864643	1.04954	1.12377	1.12388	1.11736	1.06677	1.07702	1.08619	1.07707	1.00333	1.14485	1.16539	1.07196	1.0596	1.00922	1.09286	1.0711	1.17009	1.1396	1.15272	1.21245	1.19152	1.20152	1.15313	1.15324	1.23811	1.22551	1.26709	1.20355	1.12794	1.18404	1.24666	1.31666	1.33122	1.37164	1.22421	1.28669	1.19881	1.30819	1.16198	1.30649	1.17404	1.11694	1.25431	1.33913	1.4609	1.427	1.35221
226	1.43209	1.32803	1.25396	1.33997	1.37767	1.3696	1.42126	1.39282	1.34176	1.33292	1.31362	1.32583	1.3556	1.32927	1.37992	1.39253	1.34687	1.31467	0.56372	0.554496	0.729109	0.777087	0.775078	0.659257	0.630748	0.565626	0.574586	0.6313	0.662357	0.740003	0.749486	0.794156	0.813534	0.88902	0.969093	0.989796	0.983647	0.933498	0.993677	0.902686	0.944228	0.921239	0.965053	0.993284	1.01448	1.00325	1.0206	1.08009	1.15111
227	0.440075	0.426085	0.420062	0.407974	0.407368	0.38995	0.406881	0.397083	0.399044	0.398321	0.404143	0.396575	0.412038	0.40482	0.416464	0.432773	0.438521	0.423014	0.445601	0.497037	0.559027	0.64613	0.704751	0.723015	0.740181	0.732388	0.749111	0.820508	0.872023	0.896936	0.892482	0.891443	0.872654	0.908843	0.942063	0.973676	1.05994	1.12844	1.18353	1.20144	1.20063	1.22585	1.1612	1.09619	1.06807	1.09505	1.0509	1.13303	1.10814
228	1.15232	1.05948	1.11915	1.10664	1.16736	1.26407	1.24214	1.25084	1.38354	1.05959	1.30142	1.05102	1.0537	1.21718	1.31647	1.36483	1.39441	1.41965	1.41501	1.29218	1.25037	1.17273	1.22517	1.29654	1.2112	1.17267	1.2174	1.30442	1.25635	1.31437	1.37916	1.35113	1.43452	1.43119	1.41545	1.48536	1.51036	1.54603	1.21531	1.35015	1.39049	1.32158	0.693603	0.780479	0.851622	0.823287	0.789345	0.74611	0.626787
229	1.23453	1.26332	1.11316	1.14498	1.07801	1.11737	1.33873	1.33282	1.15322	1.20538	1.20944	1.24333	1.17569	1.301	1.26748	1.27259	1.27376	1.23824	1.0675	1.2188	1.14441	1.09739	1.34402	1.41589	1.32029	1.18306	1.16495	1.15341	1.21013	1.26759	1.33775	1.19461	1.33471	1.19765	1.37021	1.35605	1.34087	1.37777	1.49254	1.46248	1.46848	1.30519	0.636472	0.627185	0.569733	0.670228	0.503679	0.648946	0.607439
230	1.21012	1.28799	1.39309	1.3242	1.30133	1.37509	1.40881	1.40802	1.39869	1.43386	1.4085	1.32222	1.28634	1.38321	1.44336	1.46708	1.46667	1.4286	1.46772	1.43007	1.41274	1.37713	1.41055	1.39898	1.45338	1.38835	1.46429	1.43559	1.42193	1.28863	1.36453	1.35115	1.37211	1.45973	1.48286	1.49257	1.47773	1.48732	1.54823	1.54038	1.38037	1.34873	1.44528	0.646827	0.699278	0.554593	0.613744	0.755183	0.696246
231	1.14669	1.17233	1.11902	1.14043	1.14591	1.12819	1.17784	1.19487	1.1901	1.13502	1.20837	1.15367	1.18776	1.27919	1.2131	1.1867	1.19595	1.20931	1.35482	1.38202	1.39886	1.45219	1.47414	1.38643	1.35923	1.32685	1.32109	1.33859	1.30852	1.22805	1.23306	1.21307	1.30032	1.45802	1.40966	1.4052	1.46676	1.41687	1.35632	1.3781	1.37768	1.28776	1.3304	1.35681	1.35547	0.663412	0.491387	0.608806	0.742758
232	1.16751	1.18117	1.22752	1.18893	1.21198	1.16625	1.20548	1.2317	1.22374	1.30239	1.33741	1.27717	1.26144	1.28125	1.32609	1.3732	1.36262	1.33956	1.35008	1.36675	1.34721	1.37783	1.34842	1.47352		1.41034	1.45674	1.3953	1.31973	1.29384	1.2549	1.28941	1.29202	1.20084	1.21833	1.19919	1.2534	1.28077	1.25029	1.2309	1.29385	1.30762	1.30231	1.28288	1.2937	1.23262	1.22376	1.25271	1.31723
233	1.13225	1.0904	1.18758	1.1527	1.18282	1.26591	1.22874	1.23356	1.22453	1.27513	1.24281	1.25506	1.25149	1.28762	1.20922	1.28872	1.28623	1.26614	1.26567	1.34391	1.29159	1.34167	1.34408	1.25139	1.36383	1.4402	1.51058	1.43899	1.33783	1.43444	1.37529	1.32479	1.38152	1.43443	1.35535	1.37979	1.34717	1.24661	1.33836	1.43367	1.37449	1.20799	0.852494	0.815347	0.772957	0.809728	0.895989	0.845203	0.753835
234	0.736721	0.789076	0.817091	0.838317	0.894903	0.935063	0.967547	0.881953	0.928457	0.986193	1.00331	0.999445	1.06564	1.13708	1.15262	1.16237	1.20728	1.12702	1.28199	1.36013	1.30592	1.1725	1.13751	1.17603	1.1969	1.27937	1.2116	1.28359	1.28197	1.23453	1.30343	1.33817	1.38644	1.52942	1.5709	1.58786	1.49364	1.41728	1.4079	1.48105	1.18122	1.13777	1.30043	1.19855	1.4032	1.48991	1.38342	1.44762	1.36813
235	1.24556	1.25284	1.34185	1.28398	1.32639	1.38136	1.40364	1.37351	1.43717	1.40132	1.4624	1.47767	1.44959	1.47271	1.43996	1.43499	1.42809	1.43028	1.45304	1.37257	1.288	1.37724	1.37575	1.40284	1.35613	1.45343	1.54432	1.55211	1.55265	1.55895	1.51618	1.49303	1.4516	1.50328	1.52236	1.51653	1.56052	1.54117	1.42762	0.718725	0.693219	0.626473	0.73963	0.743075	0.748116	0.597915	0.505791	0.416399	0.437377
236	0.735527	0.757961	0.766716	0.776122	0.863478	0.85608	0.799871	0.868617	0.894342	0.986498	1.07934	1.10411	1.18751	1.18064	1.21899	1.14744	1.17011	1.18233	1.19297	1.15777	1.18416	1.16034	1.16171	1.15569	1.09345	1.05396		1.06632	1.0891	1.11939	1.14009	1.12523	1.07724	1.10846	1.16269	1.09204	1.11783	1.13907	1.16854		1.18779	1.22756	1.24304	1.25751	1.29121		1.27802	1.41397	1.4026
237	0.891922	0.942809	0.962706	1.03742	1.09704	1.12441	1.2074	1.29051	1.33515	1.38512	1.38161	1.47002	1.359	1.35909	1.35008	1.36534	1.36606	1.36103	1.38384	1.31581	1.28323	1.32581	1.34746	1.25685	1.40923	1.43156	1.32879	1.34407	1.23698	1.21249	1.24966	1.2616	1.24813	1.31619	1.32905	1.33716	1.44863	1.4317	1.46595	1.52806	1.62536	1.53075	1.54701	1.56154	1.47893	1.52393	1.57197	1.5436	1.38005
238	1.39569	1.34734	1.22239	1.1956	1.21928	1.22232	1.30558	1.29742	1.3248	1.32787	1.25758	1.38049	1.38296	1.36601	1.26734	1.23978	1.37685	1.31448	1.24769	1.34647	1.23049	1.17221	1.34784	1.38483	1.40652		1.3461	1.32891	1.53997	1.71456	1.63806	1.67854	1.68038	1.63591	1.6017	1.64018	1.64331	1.53738	1.59393	1.52315	1.43749	1.43325	1.29461	0.618913	0.498404	0.602552	0.761884	0.726126	0.674156
239	1.34246	1.32152	1.34454	1.32332	1.3525	1.33803	1.3555	1.36936	1.31361	1.31395	1.39759	1.39343	1.42003	1.51175	1.46091	1.47408	1.45107	1.3824	1.41982	1.39197	1.417	1.42894	1.42578	1.44548	1.48176	1.45569	1.45233	1.46873	1.43057	1.44227	1.42638	1.38169	1.3405	0.669046	0.67261	0.59825	0.854856	0.803131	0.753386	0.657318	0.533842	0.517764	0.482444	0.449503	0.442809	0.420288	0.42036	0.410951	0.414913
240	1.10361	1.10307	1.07988	1.09217	1.09971	1.11016	1.09989	1.08512	0.954281	0.946118	0.971221	1.07198	0.967516	0.916266	0.933923	0.8496	0.965893	0.846075	0.881145	0.918394	0.906502	0.929523	0.95525	0.901989	0.894795	0.918183	0.919323	0.913538	0.973948	0.952783	1.01392	1.09428	1.18276	1.21394	1.32074	1.27252	1.17739	1.1247	1.11557	1.11197	1.17949	1.13549	1.32822	1.35614	1.2859	1.24623	1.2366	1.25181	1.17731
241	0.581801	0.824591	0.850415	0.84819		1.22404		1.23772		1.27802	1.28394	1.32153	1.26973	1.31168	1.39635	1.40991	1.38625	1.31788		1.26239	1.30045	1.27837	1.22778	1.22661	1.23557	1.27434	1.30179	1.35508	1.38933	1.37024	1.37233	1.32276	1.39262	1.3754	1.41305	1.50551	1.49958	1.41681	1.49838	1.41352	1.36253	1.37539	1.28083	1.13974	1.29639	1.16091	1.2239	1.21487	1.26731
242	1.24556	1.25284	1.34185	1.28398	1.32639	1.38136	1.40364	1.37351	1.43717	1.40132	1.4624	1.47767	1.44959	1.47271	1.43996	1.43499	1.42809	1.43028	1.45304	1.37257	1.288	1.37724	1.37575	1.40284	1.35613	1.45343	1.54432	1.55211	1.55265	1.55895	1.51618	1.49303	1.4516	1.50328	1.52236	1.51653	1.56052	1.54117	1.42762	0.718725	0.693219	0.626473	0.73963	0.743075	0.748116	0.597915	0.505791	0.416399	0.437377
243	0.997327	1.03538	1.11082	1.14322	1.14015	1.08896	1.1737	1.22041	1.20306	1.16367	1.23942	1.19181	1.2565	1.27806	1.18918	1.10669	1.14088	1.16087	1.22827	1.27011	1.28766	1.31746	1.3675	1.35219	1.39658	1.3968	1.39417	1.36979	1.38108	1.30698	1.31981	1.34562	1.32613	1.22885	1.35568	1.36531	1.35995	1.35169	1.37299	1.42286	1.33844	1.30543	1.32403	1.36037	1.29894	1.28492	1.44059	0.690802	0.77188
244	1.04668	1.09869	1.15656	1.07853	1.15119	1.17997	1.15646	1.22656	1.17647	1.23158	1.21733	1.29461	1.26643	1.36409	1.37531	1.25045	1.32578	1.45056	1.4609	1.45041	1.40918	1.47055	1.39133	1.31252	1.34936	1.43839	1.45418	1.36042	1.40529	1.50458	1.55409	1.55115	1.51949	1.51992	1.55239	1.3617	1.41495	1.39754	1.18978	1.42258	1.61648	1.62417	1.61127	1.59462	1.43786	1.42638	1.38669	0.797185	0.784974
245	0.518748	0.547736	0.620637	0.578547	0.645168	0.66347	0.696339	0.674754	0.721889	0.721925	0.724859	0.789776	0.746876	0.78465	0.818224	0.826879	0.868129	0.884538	0.961486	1.03238	0.981387	1.03465	1.05339	1.02851	1.00038	1.00368	0.991824	0.963195	1.02654	0.998847	0.984111	0.950386	0.938333	0.950332	0.98927	0.977913	0.984509	0.953458	1.0212	1.04999	1.03377	0.984895	0.993172	0.982959	0.976844	1.01722	1.10628	1.10492	1.02322
246	0.473421	0.466898	0.458425	0.465347	0.481342	0.506902	0.490653	0.47997	0.4895	0.494449	0.481443	0.468048	0.469163	0.451565	0.429666	0.409558	0.413448	0.406989	0.399511	0.425396	0.418466	0.427694	0.434781	0.454601	0.432897	0.423927	0.430305	0.43554	0.426235	0.46242	0.464318	0.466775	0.520785	0.511923	0.536718	0.551437	0.593111	0.658322	0.683487	0.778345	0.822815	0.786786	0.785802	0.817338	0.926767	0.971004	0.977503	0.944699	1.04487
247	0.812256	0.701968	0.838145	0.832948	0.737327	0.842923	0.814384	0.811445	0.804856	0.859101	0.883954	0.957891	0.926568	1.05605	1.07089	1.02156	1.0591	1.02854	1.01825	1.01486	1.00678	1.05291	1.10474	0.969029	0.88201	0.991962	1.03363	1.11814	1.13723	1.19987	1.29617	1.31721	1.3667	1.32555	1.36816	1.36891	1.36059	1.28583	1.25364	1.18215	1.03766	0.921336	1.16033	1.24543	1.11331	1.25616	1.33097	0.957953	0.58837
248	0.312907	0.313801	0.305878	0.304084	0.30131	0.288569	0.299702	0.30411	0.296327	0.317255	0.307498	0.321406	0.32547	0.348697	0.345368	0.358127	0.389222	0.40735	0.440453	0.476621	0.507789	0.568468	0.601485	0.651622	0.669766	0.781358	0.759423	0.828096	0.829399	0.838209	0.877698	0.911663	0.818791	0.76157	0.756937	0.813774	0.822254	0.942542	0.900559	0.918836	1.0193	1.01785	1.04967	0.981103	1.00166	1.01579	1.02459	1.04385	1.04258
249	1.22457	1.0849	1.08874	1.12274	1.09593	1.02447	1.09824	1.06748	1.13156	1.2194	1.24774	1.33105	1.32925	1.22842	1.20191	1.30615	1.19084	1.24893	1.19464	1.20743	1.29157	1.12984	1.1936	1.26453	1.26271	1.29656	1.32403	1.40515	1.36489	1.43669	1.34235	1.30389	1.31263	1.18481	1.26416	1.46695	1.51235	1.49337	1.47049	1.36813	1.24874	0.811956	0.847656	0.734105	0.683266	0.585625	0.57845	0.539602	0.471704
250	0.478221	0.442546	0.437393	0.479194	0.449968	0.45041	0.462284	0.459024	0.466185	0.454504	0.433927	0.400886	0.377336	0.413857	0.447199	0.473465	0.525124	0.53841	0.582458	0.591762	0.643681	0.640981	0.648674	0.656888	0.610665	0.627801	0.570388	0.635534	0.749369	0.694593	0.701503	0.738759	0.806989	0.870569	0.845745	0.804874	0.726969	0.663645	0.764582	0.792811	0.805098	0.814586	0.798288	0.931416	0.904724	0.919068	0.935099	1.1574	1.15246
251	0.440075	0.426085	0.420062	0.407974	0.407368	0.38995	0.406881	0.397083	0.399044	0.398321	0.404143	0.396575	0.412038	0.40482	0.416464	0.432773	0.438521	0.423014	0.445601	0.497037	0.559027	0.64613	0.704751	0.723015	0.740181	0.732388	0.749111	0.820508	0.872023	0.896936	0.892482	0.891443	0.872654	0.908843	0.942063	0.973676	1.05994	1.12844	1.18353	1.20144	1.20063	1.22585	1.1612	1.09619	1.06807	1.09505	1.0509	1.13303	1.10814
252	0.408305	0.428124	0.456266	0.476675	0.428921	0.412609	0.398948	0.395567	0.387869	0.382934	0.356887	0.350573	0.368695	0.359059	0.376799	0.385155	0.376528	0.391789	0.397076	0.414899	0.417435	0.439454	0.477062	0.521444	0.579267	0.657737	0.682903	0.768464	0.811782	0.81394	0.843746	0.920893	0.947837	0.986409	1.05574	1.08765	1.14021	1.13673	1.17778	1.26754	1.21009	1.20868	1.20222	1.17961	1.31794	1.16679	1.0456	1.08075	1.11038
253	0.69362	0.74491	0.760786	0.717867	0.702393	0.722857	0.689676	0.646717	0.633951	0.594817	0.587616	0.608424	0.584826	0.57035	0.575847	0.549135	0.520762	0.502862	0.519864	0.539088	0.50189	0.503784	0.499246	0.49424	0.524111	0.544834	0.568117	0.607331	0.651662	0.671471	0.69268	0.775116	0.844399	0.85211	0.841206	0.95298	0.990572	0.90862	0.994564	1.06671	1.05519	1.11963	1.20709	1.16781	1.22663	1.20696	1.28558	1.22537	1.19262
254	1.27342	1.41323	1.41985	1.36546	1.33026	1.26971	1.30606	1.27414	1.24106	1.25174	1.31093	1.42799	1.42744	1.42261	1.38345	1.43516	1.37269	1.32443	1.23461	1.35894	1.10833	1.257	1.29998	1.20619	1.18736	1.1558	1.26406	1.33439	1.35288	1.34358	1.35889	1.32618	1.13306	1.19891	1.17552	1.23711	1.36791	1.17105	1.18861	1.23294	1.358	1.48096	1.42285	1.45697	1.33512	0.683749	0.6914	0.603278	0.769577
255	1.11748	1.04591	1.13752	1.01389	0.9103	0.85554	0.969901	1.14071	1.06721	1.32076	1.01708	1.00321	1.02889	1.10962	0.932891	0.51964	0.563922	0.395329	0.526185	0.596235	0.640168	0.519222	0.485452	0.786079	0.819092	0.797893	0.798941	0.807328	0.814678	0.806793	0.858587	0.89403	0.965212	0.994874	1.02838	1.13735	1.14016	1.1084	1.23824	1.06384	1.16121	1.26893	1.32446	1.33554	1.24937	1.3329	1.39201	1.15384	1.06701
256	0.32027	0.330247	0.329591	0.348307	0.341657	0.347035	0.354597	0.347243	0.349836	0.344878	0.342425	0.350202	0.360449	0.338735	0.337518	0.332967	0.351096	0.356219	0.361838	0.364597	0.352475	0.372947	0.396556	0.425562	0.468231	0.495095	0.503934	0.487981	0.44998	0.423681	0.398912	0.405201	0.409113	0.388749	0.370338	0.35877	0.341126	0.366591	0.382747	0.396802	0.450554	0.49484	0.544577	0.552084	0.570785	0.631881	0.691236	0.72078	0.744226
257	0.576337	0.563913	0.552847	0.53475	0.556054	0.538927	0.544896	0.578082	0.580967	0.570407	0.589783	0.579987	0.543582	0.496515	0.4896	0.51883	0.511502	0.511191	0.520219	0.522928	0.528282	0.523969	0.510673	0.488949	0.511782	0.54035	0.545219	0.57999	0.578354	0.608898	0.62906	0.704754	0.719364	0.767415	0.844004	0.955363	1.02327	1.05433	1.08063	1.09874	1.15319	1.18397	1.26967	1.344	1.33582	1.3614	1.31832	1.47316	1.44145
258	0.691403	0.814497	0.864747	0.887798	0.900815	0.901955	0.88243	0.896262	0.895909	0.942143	0.934884	0.98985	1.00686	1.04923	1.06171	1.09111	1.09951	1.15626	1.20302	1.22648	1.29953	1.25079	1.32589	1.34029	1.3056	1.30223	1.31826	1.27042	1.29138	1.25546	1.31379	1.29298	1.31986	1.27649	1.28245	1.33549	1.33214	1.35196	1.35693	1.43558	1.38101	1.34723	1.33044	1.33927	1.34094	1.38162	1.39254	1.38095	1.36885
259	1.34814	1.43979	1.4804	1.4936	1.44279	1.48064	1.46021	1.46513	1.43138	1.49765	1.49969	1.47287	1.58819	1.50362	1.51254	1.56732	1.6524	1.72162	1.62556	1.65461	1.72818	1.69677	1.64383	1.55226	1.509	1.52733	1.42141	1.49324	1.61927	1.60463	1.60174	1.64728	1.6117	1.61024	1.66686	1.64359	1.65626	1.64818	1.50278	0.816612	0.819065	0.964017	0.826103	0.780306	0.736442	0.641998	0.596737	0.602707	0.593768
260	1.50554	1.4576	1.46764	1.56941	1.48192	1.32263	1.3361	1.35768	1.36317	1.32699	1.33424	1.35526	1.33929	1.32081	1.27357	1.31222	1.33114	1.39985	1.41104	1.39467	1.44543	1.39185	1.3395	1.40734	1.47778	1.45696	1.36001	1.28412	1.30156	1.33767	1.45721	1.49248	1.52684	1.45619	1.48301	1.46093	1.42847	1.35703	1.39178	1.32926	1.27898	1.22678	1.18056	1.19556	1.21637	1.22512	1.246	1.26248	1.21749
261	0.473421	0.466898	0.458425	0.465347	0.481342	0.506902	0.490653	0.47997	0.4895	0.494449	0.481443	0.468048	0.469163	0.451565	0.429666	0.409558	0.413448	0.406989	0.399511	0.425396	0.418466	0.427694	0.434781	0.454601	0.432897	0.423927	0.430305	0.43554	0.426235	0.46242	0.464318	0.466775	0.520785	0.511923	0.536718	0.551437	0.593111	0.658322	0.683487	0.778345	0.822815	0.786786	0.785802	0.817338	0.926767	0.971004	0.977503	0.944699	1.04487
262	1.25189	1.28926	1.3166	1.37987	1.4266	1.38263	1.32778	1.2826	1.22847	1.18098	1.12069	1.10624	1.13542	1.19095	1.19664	1.21188	1.22677	1.26686	1.29108	1.31423	1.3137	1.34551	1.31655	1.40004	1.36632	1.4045	1.45288	1.41431	1.39489	1.39819	1.43219	1.35403	1.33542	1.38459	1.39018	1.39366	1.39428	1.44328	1.4205	1.49898	1.44727	1.48996	1.47011	1.49125	1.53077	1.41416	1.34044	0.855386	0.75569
263	1.35984	1.27292	1.23078	1.29889	1.40311	1.32194	1.21011	1.21428	1.33236	1.45041	1.29102	1.37966	1.24585	1.40576	1.25304	1.47356	1.59212	1.47443	1.31536	1.35588	1.29357	1.33716	1.37803	1.26714	1.52068	1.66736	1.42042	1.45688	1.38354	1.30599	1.28491	1.67877	1.42507	1.36198	1.40956	1.33236	1.29631	1.22568	1.35623	1.30621	1.40451	1.27996	1.12399	0.801124	0.773695	0.910532	0.8067	0.885322	0.684607
264	1.00001	1.04668	1.13422	1.17485	0.952056	1.09085	1.09588	1.14835	1.12761	1.09911	1.04115	1.01716	1.06673	1.12685	1.24326	0.982627	0.940411	0.886199	1.00108	1.05144	1.14993	0.983916	1.08159	1.11051	1.05396	1.17865	1.27893	1.3275	1.29062	1.23391	1.17153	1.18209	1.22332	1.2401	1.09034	1.18036	1.32227	1.13431	1.22426	1.27023	1.09732	1.18547	1.03144	1.11706	1.16883	1.16419	0.9737	1.15563	1.13662
265	1.33263	1.31966	1.21823	1.24889	1.23724	1.27381	1.23189	1.18727	1.22283	1.21859	1.21974	1.19942	1.23968	1.29301	1.26804	1.13563	1.2534	1.14342	1.27674	1.45761	1.41143	1.14168	1.258	1.08403	1.06045	1.17125	1.19664	1.28093	1.22292	1.29891	1.29544	1.32427	1.38948	1.39489	1.3827	1.35196	1.37332	1.36516	1.47576	1.48267	0.648286	0.755433	0.741599	0.778028	0.743365	0.717991	0.600055	0.474697	0.38275
266	0.778464	0.796501	0.823638	0.872131	0.871714	0.925039	0.912681	0.899741	0.913828	0.922032	0.953813	0.939349	0.969452	0.910501	1.06782	1.08255	1.12181	1.05794	1.14307	1.04212	1.13938	1.15054	1.05867	1.04887	0.98664	1.07634	1.02886	0.935552	1.00208	0.940837	0.92271	0.99763	0.983988	0.988857	0.980077	1.07043	1.11942	1.10234	1.18481	1.165	1.06967	1.01087	1.03275	0.980221	1.10043	1.05625	1.16469	1.27264	1.23838
267	0.591615	0.588457		0.613903	0.632059	0.571141	0.603644	0.596895	0.616525	0.562901	0.575736	0.572028	0.57079	0.586599	0.549918	0.58246	0.583091	0.571766	0.560827	0.623789	0.650955	0.674896	0.682556	0.620941	0.619492	0.606357	0.619119	0.65188	0.681912	0.674436	0.678413	0.688534	0.70224	0.690779	0.739763	0.801654	0.723313	0.74632	0.749896	0.770233	0.769396	0.889753	0.890591	0.913005	0.924058	0.981601	1.10733	1.14296	1.21922
268	1.19025	1.2443	1.26786	1.19299	1.2571	1.34196	1.30474	1.38389	1.35831	1.37796	1.24676	1.25393	1.40811	1.38554	1.22368	1.17823	1.30254	1.36952	1.31136	1.35858	1.27078	1.31753	1.3112	1.16384	0.776358	0.717172	0.855166	0.741246	0.857958	0.737991	0.689885	0.657017	0.600134	0.612612	0.631683	0.667773	0.679578	0.747762	0.764009	0.787853	0.809808	0.827085	0.900093	0.904388	0.920308	0.948832	0.987908	1.01443	0.966095
269	0.984378	1.04241	1.10476	1.15897	1.24151	1.30635	1.31871	1.29126	1.15792	1.15383	1.095	1.21868	1.3266	1.38892	1.48555	1.48694	1.45565	1.44305	1.36693	1.4641	1.44195	1.47483	1.47812	1.54829	1.44912	1.38651	1.38433	1.36605	1.36045	1.43465	1.42979	1.34232	1.48237	1.56094	1.49827	1.43396	1.43492	1.32112	1.4322	1.53815	1.49393	1.54835	1.52655	1.49064	1.47985	1.36214	1.43871	1.57599	1.56208
270	1.09587	1.0623	1.05036	1.09545	1.06246	1.03645	1.04457	1.06887	1.06049	1.07296	1.07461	1.08581	1.07011	1.03824	1.09868	1.13389	1.12517	1.1865	1.14835	1.18781	1.17788	1.13989	1.18518	1.19285	1.18174	1.18482	1.23057	1.318	1.31346	1.27209	1.27998	1.24944	1.27812	1.30965	1.3192	1.33943	1.3379	1.33998	1.33294	1.39168	1.3325	1.36482	1.35919	1.40545	1.33331	1.34683	1.40093	0.711155	0.618471
271	0.430979	0.456189	0.509346	0.523431	0.574399	0.634607	0.649172	0.629005	0.695012	0.742216	0.780789	0.767465	0.838622	0.851103	0.866054	0.869307	0.919805	0.962571	1.0241	1.05618	0.955053	0.9747	0.993085	0.936458	1.04443	1.1551	1.22753	1.20674	1.25329	1.27112	1.18475	1.19591	1.1317	0.937121	0.925966	0.977836	0.884617	1.14815	1.19965	1.11887	1.07698	1.21711	1.35355	1.17565	1.3203	1.34553	1.35026	1.43447	1.37943
272	0.645389	0.741036	0.771297	0.76164	0.743416	0.780681	0.843274	0.874606	0.876517	0.883774	0.94075	0.984564	0.978002	1.02755	1.01615	1.00586	1.04566	1.01982	0.958733	1.23869	1.14386	1.17698	1.2794	1.26897	1.23851	1.31458	1.30662	1.31711	1.30619	1.31824	1.25012	1.14034	1.1296	1.31025	1.41073	1.37043	1.22872	1.24377	1.36868	1.41136	1.26834	1.33542	1.38369	1.27827	1.32965	1.40959	1.35006	1.3796	0.720558
273	0.64858	0.615176	0.647501	0.675992	0.719919	0.801685	0.824343	0.856332	0.887444	0.92197	0.908333	0.906124	0.926439	0.914567	0.970969	1.01756	1.04287	1.09679	1.09034	1.11244	1.11531	1.09359	1.06344	1.09726	1.07957	1.06536	1.168	1.14792	1.24037	1.2209	1.25507	1.24536	1.31351	1.279	1.23243	1.1885	1.16293	1.1935	1.2225	1.20726	1.16257	1.19749	1.08579	1.17433	1.17429	1.25474	1.28102	1.3656	1.17001
274	1.0299	1.07005	1.07614	1.02964	1.03183	1.08695	1.15704	1.24488	1.29815	1.37129	1.41716	1.43169	1.47405	1.37297	1.38626	1.41023	1.42537	1.45214	1.35485	1.37209	1.38213	1.36083	1.30474	1.31859	1.34453	1.25205	1.21199	1.23508	1.34166	1.35665	1.27932	1.30268	1.35178	1.36522	1.35072	1.43973	1.3962	1.37835	1.38721	1.40991	1.41599	1.40574	1.53383	1.53724	1.48504	1.39556	1.42181	1.42108	1.44046
275	0.632552	0.686219	0.756247	0.737265	0.703985	0.701183	0.732981	0.741207	0.75979	0.733267	0.719956	0.685536	0.668843	0.650693	0.660301	0.711759	0.674373	0.685438	0.74106	0.822436	0.900006	1.02518	1.11653	1.02947	1.14794	1.23866	1.28349	1.22002	1.18999	1.17277	1.14468	1.1479	1.1967	1.25271	1.22903	1.30352	1.32089	1.32843	1.26496	1.22842	1.26538	1.36552	1.83457	1.6078	1.32764	1.26244	1.25352	1.25514	1.17768
276	0.580377	0.590153	0.556132	0.563173	0.528431	0.52836	0.509598	0.489127	0.496693	0.488071	0.499829	0.509361	0.549862	0.530548	0.569283	0.60299	0.62874	0.652001	0.71744	0.741341	0.823143	0.785194	0.811497	0.85314	0.846646	0.849408	0.856498	0.911239	0.980733	0.91544	0.907543	0.874261	0.925628	0.999797	0.975805	1.07286	0.9883	1.04915	1.12554	1.10637	1.06046	1.10994	1.21367	1.17142	1.23364	1.20868	1.23234	1.36954	1.24421
277	0.418002	0.419887	0.421074	0.422749	0.440427	0.439612	0.441793	0.465582	0.435784	0.474098	0.489073	0.508423	0.623636	0.686289	0.748164	0.749625	0.76716	0.799273	0.836413	0.849518	0.906605	0.986609	1.10082	1.18536	1.23283	1.29658	1.24429	1.28538	1.21923	1.25602	1.23456	1.22024	1.31542	1.28673	1.15959	1.14153	1.13059	1.12925	1.21046	1.1928	1.16777	1.23496	1.17676	1.21778	1.28597	1.26991	1.19593	1.27351	1.26211
278	0.35182	0.336297	0.341678	0.322472	0.349519	0.345208	0.347357	0.34605	0.321652	0.3309	0.331021	0.342448	0.338741	0.364632	0.367883	0.371173	0.391445	0.393132	0.378696	0.389593	0.372391	0.400305	0.417196	0.453028	0.533171	0.532877	0.592457	0.601163	0.612471	0.674045	0.716373	0.753108	0.779198	0.889147	0.919512	0.920109	0.892924	0.86756	0.765469	0.783273	0.864314	0.874178	0.885998	0.850419	0.953257	0.823188	0.965845	0.88088	0.954505
279	1.07005	1.15649	1.16872	1.20499	1.19682	1.26064	1.29271	1.36496	1.40097	1.49743	1.47685	1.56787	1.64168	1.6751	1.80741	1.68917	1.61275	1.56592	1.56356	1.63778	1.79288	1.70011	1.71107	1.67506	1.57853	1.48317	1.55013	1.53002	1.5303	1.46948	1.45115	1.44042	1.4261	1.46817	1.43308	1.47263	1.42519	1.47819	0.712903			0.391903	0.521843	0.569455	0.6434	0.572866	0.55497	0.557106	0.604472
280	0.812256	0.701968	0.838145	0.832948	0.737327	0.842923	0.814384	0.811445	0.804856	0.859101	0.883954	0.957891	0.926568	1.05605	1.07089	1.02156	1.0591	1.02854	1.01825	1.01486	1.00678	1.05291	1.10474	0.969029	0.88201	0.991962	1.03363	1.11814	1.13723	1.19987	1.29617	1.31721	1.3667	1.32555	1.36816	1.36891	1.36059	1.28583	1.25364	1.18215	1.03766	0.921336	1.16033	1.24543	1.11331	1.25616	1.33097	0.957953	0.58837
281	0.632552	0.686219	0.756247	0.737265	0.703985	0.701183	0.732981	0.741207	0.75979	0.733267	0.719956	0.685536	0.668843	0.650693	0.660301	0.711759	0.674373	0.685438	0.74106	0.822436	0.900006	1.02518	1.11653	1.02947	1.14794	1.23866	1.28349	1.22002	1.18999	1.17277	1.14468	1.1479	1.1967	1.25271	1.22903	1.30352	1.32089	1.32843	1.26496	1.22842	1.26538	1.36552	1.83457	1.6078	1.32764	1.26244	1.25352	1.25514	1.17768
282	1.23063	1.3126	1.35416	1.25998	1.28886	1.26406	1.29669	1.29423	1.38502	1.31577	1.3754	1.32778	1.37521	1.37957	1.39415	1.30384	1.34481	1.29297	1.37716	1.42259	1.3162	1.37372	1.38946	1.38262	1.25094	1.25975	1.28737	1.34197	1.24844	1.24835	1.29192	1.3364	1.36265	1.43625	1.24138	1.22652	1.33787	1.32689	1.35894	1.46891	1.36246	1.37494	0.708488	0.780508	0.839612	0.65686	0.665047	0.590082	0.444263
283	0.965673	0.968204	0.833572	0.941346	0.981289	1.05978	1.08682	0.9617	0.985777	1.10539	1.18715	1.13999	1.03293	0.853583	1.07462	1.09238	1.28269	1.11545	1.17742	1.16481	1.0741	1.0732	1.17917	1.06201	1.03547	1.07464	1.13922	1.15383	1.12919	1.06181	1.14729	1.32638	1.3462	1.49394	1.50217	0.654607		0.853444	0.640326	1.56867	1.62289	1.4834	1.39138	1.30325	1.34361	1.28447	1.13731	1.08333	1.23556
284	1.18035	1.13272	1.03019	1.01954	1.0857	1.13555	1.13269	1.2212	1.24839	1.28851	1.20534	1.20746	1.2194	1.298	1.29115	1.12842	1.13338	1.23664	1.28965	1.26252	1.30354	1.18976	1.27947	1.39287	1.46776	1.44947	1.44715	1.34274	1.37378	1.37016	1.3277	1.40291	1.4205	1.3066	1.17302	1.48339	1.38746	1.30581	1.41171	1.40474	1.23518	1.25098	1.33613	1.05247	0.653434	0.6339	0.86436	0.774392	0.798673
285	0.418002	0.419887	0.421074	0.422749	0.440427	0.439612	0.441793	0.465582	0.435784	0.474098	0.489073	0.508423	0.623636	0.686289	0.748164	0.749625	0.76716	0.799273	0.836413	0.849518	0.906605	0.986609	1.10082	1.18536	1.23283	1.29658	1.24429	1.28538	1.21923	1.25602	1.23456	1.22024	1.31542	1.28673	1.15959	1.14153	1.13059	1.12925	1.21046	1.1928	1.16777	1.23496	1.17676	1.21778	1.28597	1.26991	1.19593	1.27351	1.26211
286	0.811716	0.839413	0.862587	0.884209	0.963516	1.05675	1.16044	1.18707	1.27256	1.31085	1.36221	1.38965	1.43898	1.36268	1.39263	1.29596	1.26218	1.17904	1.19314	1.13902	1.15717	1.21593	1.23254	1.22343	1.18168	1.15869	1.11273	1.15036	1.12649	1.19548	1.14114	1.2059	1.30536	1.31156	1.36413	1.4251	1.38309	1.31348	1.30397	1.26529	1.21264	1.23338	1.35179	1.34361	1.41709	1.47546	0.773218	0.638875	0.785813
287	1.43209	1.32803	1.25396	1.33997	1.37767	1.3696	1.42126	1.39282	1.34176	1.33292	1.31362	1.32583	1.3556	1.32927	1.37992	1.39253	1.34687	1.31467	0.56372	0.554496	0.729109	0.777087	0.775078	0.659257	0.630748	0.565626	0.574586	0.6313	0.662357	0.740003	0.749486	0.794156	0.813534	0.88902	0.969093	0.989796	0.983647	0.933498	0.993677	0.902686	0.944228	0.921239	0.965053	0.993284	1.01448	1.00325	1.0206	1.08009	1.15111
288	1.34814	1.43979	1.4804	1.4936	1.44279	1.48064	1.46021	1.46513	1.43138	1.49765	1.49969	1.47287	1.58819	1.50362	1.51254	1.56732	1.6524	1.72162	1.62556	1.65461	1.72818	1.69677	1.64383	1.55226	1.509	1.52733	1.42141	1.49324	1.61927	1.60463	1.60174	1.64728	1.6117	1.61024	1.66686	1.64359	1.65626	1.64818	1.50278	0.816612	0.819065	0.846675	0.731698	0.73774	0.644365	0.582149	0.536079	0.53107	0.485419
289	0.571875	0.565948	0.518183	0.517403	0.51705	0.618716	0.679675	0.52251	0.511747	0.493788	0.492677	0.519796	0.505726	0.551914	0.537517	0.54392	0.51456	0.575386	0.529745	0.509446	0.506063	0.463419	0.470671	0.46372	0.441351	0.438388	0.450456	0.460098	0.456054	0.463733	0.466851	0.467044	0.47234	0.492234	0.510001	0.499527	0.533477	0.589183	0.651078	0.739264	0.762847	0.79057	0.792254	0.790789	0.813829	0.826223	0.856557	0.942541	0.991678
290	0.709066	0.757344	0.793401	0.817246	0.803482	0.805646	0.806285	0.820792	0.857067	0.879869	0.871607	0.885341	0.954299	0.943932	1.06123	1.14316	1.13354	1.10142	1.03931	1.02595	1.00659	1.1051	1.13846	1.1119	1.08625	1.16129	1.20722	1.20738	1.19999	1.1779	1.20033	1.20139	1.15847	1.13485	1.19282	1.24164	1.27835	1.23896	1.31639	1.31743	1.25857	1.2895	1.35399	1.27254	1.15543	1.069	1.16589	1.24289	1.13351
291	0.953134	0.959874	1.00395	1.0312	1.05353	1.10775	1.18148	1.21362	1.24254	1.29938	1.33186	1.31303	1.29588	1.2101	1.26849	1.32346	1.24141	1.25294	1.36619	1.33084	1.29891	1.38787	1.37639	1.28804	1.32221	1.35802	1.39551	1.34862	1.36885	1.31986	1.37179	1.42324	1.39469	1.32997	1.31173	1.31225	1.34328	1.20031	1.35291	1.40808	1.36492	1.32886	1.29353	1.24564	1.23664	1.28833	1.31127	1.30831	1.36187
292	0.571875	0.565948	0.518183	0.517403	0.51705	0.618716	0.679675	0.52251	0.511747	0.493788	0.492677	0.519796	0.505726	0.551914	0.537517	0.54392	0.51456	0.575386	0.529745	0.509446	0.506063	0.463419	0.470671	0.46372	0.441351	0.438388	0.450456	0.460098	0.456054	0.463733	0.466851	0.467044	0.47234	0.492234	0.510001	0.499527	0.533477	0.589183	0.651078	0.739264	0.762847	0.79057	0.792254	0.790789	0.813829	0.826223	0.856557	0.942541	0.991678
293	1.1386	1.20074	1.20584	1.19431	1.205	1.20436	1.19494	1.14797	1.22509	1.29248	1.2582	1.14985	1.21338	1.16385	1.23118	1.2342	1.29926	1.34461	1.35365	1.37484	1.47854	1.43866	1.29328	1.24994	1.18165	1.2597	1.26002	1.17649	1.42494	1.46648	1.44503	1.49192	1.41441	1.40674	1.40836	1.33178	1.27269	1.30926	1.2758	1.09169	1.13057	1.12773	1.18753	1.17181	1.12642	1.20854	1.16379	1.19763	1.21168
294	1.07802	1.12599	1.28561	1.28319	1.27572	1.256	1.30216	1.31854	1.25213	1.23686	1.26573	1.24663	1.24737	1.34804	1.34485	1.31823	1.3467	1.40903	1.33261	1.36474	1.30927	1.32244	1.32327	1.33652	1.3942	1.32198	1.46073	1.48331	0.736011	0.819795	0.782573	0.780166	0.774958	0.67259	0.625565	0.61746	0.61421	0.657937	0.666469	0.728645	0.756379	0.848466	0.904619	0.945098	1.0332	1.08652	1.12105	1.07752	1.09313
295	0.478221	0.442546	0.437393	0.479194	0.449968	0.45041	0.462284	0.459024	0.466185	0.454504	0.433927	0.400886	0.377336	0.413857	0.447199	0.473465	0.525124	0.53841	0.582458	0.591762	0.643681	0.640981	0.648674	0.656888	0.610665	0.627801	0.570388	0.635534	0.749369	0.694593	0.701503	0.738759	0.806989	0.870569	0.845745	0.804874	0.726969	0.663645	0.764582	0.792811	0.805098	0.814586	0.798288	0.931416	0.904724	0.919068	0.935099	1.1574	1.15246
296	0.900299	0.905043	0.872755	0.879275	0.885463	0.879364	0.92077	0.946883	0.998806	1.05029	1.11043	1.18487	1.29238	1.40028	1.44985	1.41545	1.46085	1.43893	1.33318	1.26143	1.24487	1.26121	1.4021	1.3869	1.44333	1.37943	1.39867	1.43229	1.42552	1.54564	1.58644	1.61755	1.60209	1.62608	1.52353	1.50351	1.46951	1.49571	1.47096	1.48269	1.50315	1.48518	1.42388	1.47859	1.55636	1.58484	1.56536	1.63211	1.59332
297	1.34252	1.37465	1.3496	1.36459	1.37302	1.36292	1.3905	1.37061	1.38161	1.35188	1.33351	1.28781	1.26856	1.29369	1.34391	1.41369	1.48092	1.48289	1.52268	1.46462	1.41311	1.4495	1.56821	1.59113	1.62373	1.68452	1.76163	1.77859	1.6894	1.68669	1.58949	1.5748	1.52477	1.46951	0.84232		0.904097	0.837927	0.751446	0.684028	0.630298	0.713576	0.685535	0.678906	0.701583	0.675249	0.71784	0.72804	0.768145
298	0.900299	0.905043	0.872755	0.879275	0.885463	0.879364	0.92077	0.946883	0.998806	1.05029	1.11043	1.18487	1.29238	1.40028	1.44985	1.41545	1.46085	1.43893	1.33318	1.26143	1.24487	1.26121	1.4021	1.3869	1.44333	1.37943	1.39867	1.43229	1.42552	1.54564	1.58644	1.61755	1.60209	1.62608	1.52353	1.50351	1.46951	1.49571	1.47096	1.48269	1.50315	1.48518	1.42388	1.47859	1.55636	1.58484	1.56536	1.63211	1.59332
299	0.811716	0.839413	0.862587	0.884209	0.963516	1.05675	1.16044	1.18707	1.27256	1.31085	1.36221	1.38965	1.43898	1.36268	1.39263	1.29596	1.26218	1.17904	1.19314	1.13902	1.15717	1.21593	1.23254	1.22343	1.18168	1.15869	1.11273	1.15036	1.12649	1.19548	1.14114	1.2059	1.30536	1.31156	1.36413	1.4251	1.38309	1.31348	1.30397	1.26529	1.21264	1.23338	1.35179	1.34361	1.41709	1.47546	0.773218	0.638875	0.785813
300	0.448163	0.453994	0.424124	0.469199	0.493391	0.488292	0.466044	0.453211	0.470011	0.463404	0.456715	0.442082	0.446094	0.438775	0.441384	0.451255	0.446823	0.428561	0.439765	0.433782	0.434425	0.417582	0.445739	0.601078	0.466463	0.487343	0.513563	0.514242	0.501332	0.469191	0.444839	0.460904	0.553976	0.440628	0.445782	0.435882	0.4461	0.429418	0.439568	0.427313	0.418733	0.43449	0.455229	0.449536	0.512969	0.535925	0.567611	0.611731	0.697448
301	1.21611	1.21533	1.30937	1.24051	1.33836	1.31965	1.36714	1.34123	1.42885	1.45478	1.36602	1.43982	1.45189	1.3766	1.24118	1.26473	1.36504	1.35229	1.38134	1.27855	1.23594	1.43978	1.42464	1.45632	1.6434	1.65689	1.58854	1.50506	1.28885	1.39501	1.39151	1.32636	0.722148	0.707958	0.868561	0.762666	0.699376	0.65326	0.603195	0.545476	0.508714	0.53614	0.566707	0.619497	0.64223	0.657486	0.68845	0.669241	0.81091
302	0.430979	0.456189	0.509346	0.523431	0.574399	0.634607	0.649172	0.629005	0.695012	0.742216	0.780789	0.767465	0.838622	0.851103	0.866054	0.869307	0.919805	0.962571	1.0241	1.05618	0.955053	0.9747	0.993085	0.936458	1.04443	1.1551	1.22753	1.20674	1.25329	1.27112	1.18475	1.19591	1.1317	0.937121	0.925966	0.977836	0.884617	1.14815	1.19965	1.11887	1.07698	1.21711	1.35355	1.17565	1.3203	1.34553	1.35026	1.43447	1.37943
303	1.46292	1.46921	1.53989	1.4768	1.49095	1.45462	1.47978	1.47376	1.53106	1.53626	1.50278	1.48124	1.40468	1.37635	1.38244	1.43092	1.38629	1.26756	1.35835	1.39404	1.50058	1.43269	1.47367	1.54162	1.57648	1.50761	1.49562	1.58764	1.6211	1.62	1.63706	1.54698	1.51968	1.52105	1.58899	1.62504	1.69439	1.72419	1.71766	1.67626	1.54359	1.35018	0.739695	0.796252	0.831339	0.787035	0.710704	0.79823	0.720808
304	0.69362	0.74491	0.760786	0.717867	0.702393	0.722857	0.689676	0.646717	0.633951	0.594817	0.587616	0.608424	0.584826	0.57035	0.575847	0.549135	0.520762	0.502862	0.519864	0.539088	0.50189	0.503784	0.499246	0.49424	0.524111	0.544834	0.568117	0.607331	0.651662	0.671471	0.69268	0.775116	0.844399	0.85211	0.841206	0.95298	0.990572	0.90862	0.994564	1.06671	1.05519	1.11963	1.20709	1.16781	1.22663	1.20696	1.28558	1.22537	1.19262
305	1.17039	1.30142	1.3428	1.27722	1.23888	1.23593	1.29776	1.37703	1.38932	1.39467	1.37731	1.39173	1.3822	1.39743	1.43664	1.37453	1.36972	1.36999	1.43667	1.43395	1.45417	1.41596	1.41776	1.41641	1.40232	1.36009	1.40081	1.46376	1.41454	1.43483	1.47838	0.654396	0.629459	0.719223	0.748271	0.814307	0.770175	0.706664	0.640226	0.651781	0.617518	0.659059	0.664235	0.69754	0.711992	0.723387	0.799872	0.820809	0.862148
306	0.430586	0.44977	0.458923	0.452949	0.439681	0.421125	0.407316	0.416367	0.424118	0.404942	0.426482	0.432623	0.453703	0.478379	0.473671	0.510544	0.528278	0.557809	0.552373	0.554864	0.581153	0.659648	0.693113	0.762406	0.839358	0.83032	0.854066	0.888019	0.924221	1.00617	0.990797	1.13173	1.08556	1.08967	1.08511	1.25389	1.19826	1.23508	1.18902	1.13105	1.19833	1.22484	1.12596	1.06335	1.07362	1.05103	1.22657	1.33968	1.31928
307	1.46292	1.46921	1.53989	1.4768	1.49095	1.45462	1.47978	1.47376	1.53106	1.53626	1.50278	1.48124	1.40468	1.37635	1.38244	1.43092	1.38629	1.26756	1.35835	1.39404	1.50058	1.43269	1.47367	1.54162	1.57648	1.50761	1.49562	1.58764	1.6211	1.62	1.63706	1.54698	1.51968	1.52105	1.58899	1.62504	1.69439	1.72419	1.71766	1.67626	1.54359	1.35018	0.739695	0.796252	0.831339	0.787035	0.710704	0.79823	0.720808
308	1.33263	1.31966	1.21823	1.24889	1.23724	1.27381	1.23189	1.18727	1.22283	1.21859	1.21974	1.19942	1.23968	1.29301	1.26804	1.13563	1.2534	1.14342	1.27674	1.45761	1.41143	1.14168	1.258	1.08403	1.06045	1.17125	1.19664	1.28093	1.22292	1.29891	1.29544	1.32427	1.38948	1.39489	1.3827	1.35196	1.37332	1.36516	1.47576	1.48267	0.648286	0.755433	0.741599	0.782659	0.783481	0.698578	0.566056	0.476216	0.43868
309	0.520036	0.494851	0.517693	0.515578	0.523283	0.463173	0.444296	0.46176	0.469153	0.446885	0.434466	0.432436	0.44184	0.432344	0.456496	0.490768	0.535346	0.588456	0.636688	0.688576	0.748026	0.779319	0.801273	0.919642	1.01022	1.12017	1.15681	1.15807	1.14122	1.11274	1.10535	1.07591	1.11588	1.10547	1.04309	1.01646	1.03592	1.06088	1.09344	1.11866	1.10903	1.0734	1.15318	1.12783	1.1098	1.05368	1.16037	1.13724	1.12856
310	0.412526	0.421654	0.432456	0.449342	0.446748	0.415546	0.433297	0.410799	0.400857	0.395014	0.395462	0.404611	0.389569	0.400315	0.383362	0.379482	0.386249	0.386	0.380708	0.375803	0.386148	0.389009	0.409424	0.427818	0.434863	0.514298	0.54219	0.594459	0.638908	0.667893	0.684297	0.650622	0.709646	0.765373	0.770941	0.824488	0.880002	0.875031	0.914867	1.00007	1.02009	0.992207	1.10505	1.05724	1.15901	1.18239	1.22393	1.15506	1.20451
311	1.07005	1.15649	1.16872	1.20499	1.19682	1.26064	1.29271	1.36496	1.40097	1.49743	1.47685	1.56787	1.64168	1.6751	1.80741	1.68917	1.61275	1.56592	1.56356	1.63778	1.79288	1.70011	1.71107	1.67506	1.57853	1.48317	1.55013	1.53002	1.5303	1.46948	1.45115	1.44042	1.4261	1.46817	1.43308	1.47263	1.42519	1.47819	0.712903			0.391903	0.521843	0.569455	0.6434	0.572866	0.55497	0.557106	0.604472
312	1.15733	1.13039	1.16207	1.11047	1.12153	1.14005	1.20528	1.18539	1.16207	1.18455	1.21212	1.13642	1.27402	1.26266	1.27038	1.25085	1.19338	1.29904	1.31371	1.39423	1.37062	1.30269	1.44182	1.48789	1.38133	1.46161	1.53635	1.51371	1.49211	1.48617	1.46807	1.53064	1.5131	1.52455	1.55315	1.60339	1.6488	1.73182	1.8748	1.85221	1.75318	1.69298	1.79951	1.67718	1.64471	1.5521	1.59305	1.53737	1.52718
313	0.493766	0.517853	0.567788	0.584245	0.616076	0.610432	0.569126	0.548299	0.555508	0.548355	0.560456	0.544205	0.540943	0.621844	0.738592	0.814454	0.828762	0.84893	0.87944	0.859264	0.859912	0.866114	0.906871	0.984325	0.993992	1.04337	1.04903	1.07889	1.13894	1.23	1.34394	1.40089	1.411	1.43158	1.42724	1.41337	1.37963	1.38889	1.37071	1.33691	1.3073	1.26159	1.33634	1.31226	1.20509	1.15364	1.10267	1.13301	1.09925
314	1.02717	1.11594	1.11286	1.11339	1.11249	1.15023	1.16836	1.14406	1.12624	1.12918	1.16623	1.17995	1.19906	1.22737	1.20964	1.25772	1.26699	1.30613	1.29842	1.34852	1.34806	1.39911	1.34325	1.35816	1.36069	1.42731	1.44706	1.46657	1.37549	1.37462	1.37605	1.37679	1.39762	1.44739	1.3731	1.37541	1.32724	1.36184	1.42012	1.43349	1.4177	1.39094	1.41707	1.38313	1.37126	1.425	1.45168	1.43243	1.41137
315	0.493766	0.517853	0.567788	0.584245	0.616076	0.610432	0.569126	0.548299	0.555508	0.548355	0.560456	0.544205	0.540943	0.621844	0.738592	0.814454	0.828762	0.84893	0.87944	0.859264	0.859912	0.866114	0.906871	0.984325	0.993992	1.04337	1.04903	1.07889	1.13894	1.23	1.34394	1.40089	1.411	1.43158	1.42724	1.41337	1.37963	1.38889	1.37071	1.33691	1.3073	1.26159	1.33634	1.31226	1.20509	1.15364	1.10267	1.13301	1.09925
316	1.07802	1.12599	1.28561	1.28319	1.27572	1.256	1.30216	1.31854	1.25213	1.23686	1.26573	1.24663	1.24737	1.34804	1.34485	1.31823	1.3467	1.40903	1.33261	1.36474	1.30927	1.32244	1.32327	1.33652	1.3942	1.32198	1.46073	1.48331	0.736011	0.819795	0.782573	0.780166	0.774958	0.67259	0.625565	0.61746	0.61421	0.657937	0.666469	0.728645	0.756379	0.848466	0.904619	0.945098	1.0332	1.08652	1.12105	1.07752	1.09313
317	1.20641	1.21192	1.25274	1.20777	1.20191	1.23622	1.22596	1.2851	1.34047	1.36916	1.41144	1.4183	1.37964	1.33901	1.34624	1.11411	1.45626	0.641531	0.635421	0.761445	0.719438	0.762562	0.699723	0.607972	0.562457	0.506863	0.477271	0.446046	0.438378	0.448709	0.422759	0.435928	0.452723	0.439942	0.428385	0.428592	0.448191	0.430574	0.40902	0.429105	0.422048	0.397082	0.371099	0.377286	0.403598	0.377159	0.399795	0.388463	0.382049
318	0.677269	0.654426	0.671455	0.599814	0.622133	0.608995	0.594783	0.546612	0.578463	0.524433	0.536315	0.528332	0.476658	0.472462	0.456008	0.44582	0.475464	0.482006	0.440061	0.454712	0.440632	0.418336	0.423298	0.413916	0.429729	0.415378	0.434959	0.443971	0.468646	0.482333	0.496902	0.517294	0.541204	0.570683	0.632595	0.651362	0.664513	0.752815	0.783297	0.785386	0.826242	0.868231	0.935901	0.956848	0.921823	0.994791	1.10197	1.17176	1.24393
319	0.844699	0.87182	0.879976	0.990243	1.02807	1.13121	1.25018	1.2651	1.27545	1.25363	1.33368	1.43427	1.36165	1.39873	1.3532	1.37085	1.18593	1.21823	1.18615	1.256	1.17745	1.20264	1.2772	1.26084	1.2336	1.17305	1.27902	1.30761	1.20105	1.38361	1.39377	1.36228	1.3629	1.49281	1.57052	1.57386	1.59901	1.58173	1.58226	1.62281	1.59677	1.56006	1.54283	1.39543	1.10171	1.20626	1.29653	1.41135	1.42785
320	0.412526	0.421654	0.432456	0.449342	0.446748	0.415546	0.433297	0.410799	0.400857	0.395014	0.395462	0.404611	0.389569	0.400315	0.383362	0.379482	0.386249	0.386	0.380708	0.375803	0.386148	0.389009	0.409424	0.427818	0.434863	0.514298	0.54219	0.594459	0.638908	0.667893	0.684297	0.650622	0.709646	0.765373	0.770941	0.824488	0.880002	0.875031	0.914867	1.00007	1.02009	0.992207	1.10505	1.05724	1.15901	1.18239	1.22393	1.15506	1.20451
321	0.37499	0.390168	0.400808	0.425346	0.404017	0.427015	0.456096	0.461793	0.484976	0.455059	0.424572	0.43121	0.429859	0.458261	0.458493	0.480566	0.51968	0.50018	0.517323	0.533825	0.57566	0.581966	0.55465	0.585358	0.570202	0.565587	0.639433	0.663474	0.723277	0.790187	0.800502	0.858063	0.886035	0.89688	0.940016	1.01572	1.04503	1.17577	1.07099	1.12273	1.0493	0.878146	1.07496	1.07554	1.16835	1.21646	1.19084	1.147	1.20792
[truncated: 111 more columns]

## Sheet: ZD
Source data for figure 3B - CDK2 ratios for each track throughout the movie. ZD Condition
Track# is a relative index assigned to each track in the dataset. Each frame is spaced 12 mins apart.
	Frame	Frame	Frame	Frame	Frame	Frame	Frame	Frame	Frame	Frame	Frame	Frame	Frame	Frame	Frame	Frame	Frame	Frame	Frame	Frame	Frame	Frame	Frame	Frame	Frame	Frame	Frame	Frame	Frame	Frame	Frame	Frame	Frame	Frame	Frame	Frame	Frame	Frame	Frame	Frame	Frame	Frame	Frame	Frame	Frame	Frame	Frame	Frame	Frame
Track#	1	2	3	4	5	6	7	8	9	10	11	12	13	14	15	16	17	18	19	20	21	22	23	24	25	26	27	28	29	30	31	32	33	34	35	36	37	38	39	40	41	42	43	44	45	46	47	48	49
1	1.09501	1.0423	0.911686	0.961906	0.995917	1.02497	1.01839	0.924833	0.982045	0.788773	0.94935	0.905864	0.916922	0.971247	1.05964	0.944956	0.87032	0.937092	1.01476	1.03632	1.05776	1.00089	0.92628	0.985593	0.990317	1.0147	1.17736	1.08511	1.24957	1.00655	1.1423	0.997339	0.981481	0.944461	0.918298	0.895917	0.851004	0.815836	0.961905	1.02177	1.01879	1.12336	1.23258	1.22772	1.13867	1.15765	1.17016	1.20125	1.19986
2	1.62414	1.66301	1.63587	1.64856	1.66662	1.55723	1.53808	1.59202	1.5593	1.62307	1.61361	1.61652	1.58301	1.5773	1.54722	1.54225	1.56705	1.60994	1.61666	1.53229	1.55556	1.47121	1.07537	0.6284	0.561567	0.492751	0.569712	0.741383	0.758197	0.657981	0.507954	0.463723	0.454596	0.458039	0.461857	0.472047	0.476788	0.456447	0.499615	0.54256	0.552979	0.595541	0.632569	0.697844	0.723257	0.752724	0.757015	0.77394	0.798729
3	1.29739	1.3958	1.35999	1.40959	1.41998	1.39961	1.40621	1.36939	1.43713	1.4071	1.49464	1.50827	1.53771	1.55508	1.54998	1.56935	1.53719	1.61085	1.71063	1.64502	1.59754	1.60263	1.52437	1.45762	1.38673	1.33236	1.30015	1.28844	1.26026	1.26875	1.28517	1.29161	1.32314	1.30172	1.25473	1.23826	1.27161	1.37425	1.42851	1.38214	1.3719	1.31507	1.32168	1.35097	1.32106	1.31814	1.36608	1.36282	1.40785
4	0.832448	0.894648	0.879464	0.855062	0.831119	0.864084	0.85984	0.866346	0.889414	0.875585	0.862939	0.862416	0.870347	0.902262	0.944366	0.924396	0.904359	0.935834	0.97936	1.17967	1.3326	1.2774	1.21706	1.29777	1.26996	1.19594	1.15184	1.18369	1.15825	1.22171	1.29555	1.22149	1.29092	1.26984	1.28099	1.23316	1.28553	1.35025	1.33378	1.33688	1.25578	1.27465	1.23004	1.24149	1.25541	1.19457	1.09456	1.14582	1.10792
5	0.904747	0.998113	1.03976	0.966436	1.07178	0.917907	1.08763	1.24846	1.24548	1.22467	1.13089	1.20464	1.16859	1.06195	1.11729	1.14735	1.16151	1.15784	1.24919	1.25223	1.24541	1.04241	1.11812	1.2169	1.2382	1.22679	1.18243	1.17223	1.30248	1.34687	1.2863	1.01638	1.20627	1.5207	1.37079	1.3262	1.17218	1.12577	1.24286	1.22716	0.656927	0.637406	0.696751	0.713255	0.68462	0.560073	0.502581	0.488811	0.460725
6	1.40083	1.3787	1.37404	1.33446	1.4353	1.39871	1.47437	1.41061	1.38851	1.52113	1.48934	1.45481	1.42887	1.49839	1.42514	1.41561	1.42486	1.37975	1.36978	1.31779	1.3599	1.44678	1.38903	1.43862	1.51794	1.55534	1.44637	1.3507	1.40524	1.50572	1.43174	1.42591	1.32583	1.44178	1.33406	1.23667	1.31694	1.30273	1.33745	1.29456	1.2916	1.32971	1.34238	1.32045	1.38331	1.41904	1.38857	1.39479	1.37275
7	0.634303	0.650956	0.731699	0.75384	0.778639	0.771742	0.803035	0.931635	1.02147	1.07799	1.09631	1.12461	1.0734	1.08119	1.01096	0.945239	0.943797	0.973866	0.976127	0.973414	0.984353	1.00451	0.975961	1.01611	0.942621	0.99526	0.995202	0.979974	0.980777	1.0402	1.03755	1.05717	0.988149	1.04642	0.973412	0.978212	0.975311	1.00362	0.962672	0.937841	0.939555	0.964867	0.993452	1.0317	1.0689	1.05288	1.0083	0.945964	0.918497
8	0.99824	1.12391	1.0488	1.11728	1.18414	1.14487	1.11925	1.1656	1.20889	1.23414	1.20896	1.2479	1.28435	1.25355	1.26068	1.28469	1.34161	1.37232	1.37305	1.23746	1.22815	1.25947	1.32268	1.33428	1.28724	1.25864	1.30061	1.37233	1.39213	1.44779	1.37426	1.37973	1.28109	1.2099	1.29648	1.32903	1.44041	1.18119	1.31279	1.27949	1.29263	1.28414	1.33561	1.25101	1.41747	1.44539	1.40544	1.4218	1.20372
9	1.31048	1.36614	1.35569	1.40058	1.35573	1.3249		1.34186	1.44871	1.40229	1.29582	1.2827	1.30194	1.31982	1.36239	1.34943	1.46143	1.45519	1.49945	1.51667	1.4746	1.5338	1.50066	1.49568	1.4048	1.39159	1.31348	1.3666	1.30276	1.30582	1.28143	1.2451	1.26782	1.3761	1.47539	1.56852	1.53458	1.51759	1.43637	1.35517	1.37917	1.29392	1.28494	1.26497	1.23084	1.42383	1.52254	1.46753	1.46819
10	0.737275	0.761055	0.786133	0.811182	0.862231	0.860895	0.875717	0.905544	0.904247	0.921624	0.979117	0.998886	1.01402	1.09591	1.11208	1.12986	1.29513	1.32354	1.32524	1.31842	1.33085	1.35569	1.36816	1.32641	1.27074	1.2472	1.24693	1.22188	1.09818	1.12166	1.17901	1.14918	1.2333	1.28264	1.36198	1.36384	1.37794	1.39653	1.36768	1.34698	1.23223	1.24023	1.23849	1.23852	1.20636	1.2608	1.23294	1.23904	1.23261
11	1.14627	1.15233	1.20625	1.20054	1.23968	1.24572	1.27174	1.27728	1.26957	1.31065	1.2965	1.29612	1.33054	1.36568	1.39624	1.39317	1.35584	1.41009	1.41688	1.39805	1.43698	1.45701	1.40221	1.42091	1.46072	1.35008	1.40314	1.43952	1.38179	1.33677	1.33073	1.40093	1.36246	1.44603	1.35211	1.46006	1.36054	1.37629	1.39613	1.4524	0.7301	0.691366	0.80754	0.81941	0.838084	0.829729	0.799195	0.746411	0.739959
12	0.780077	0.755821	0.702832	0.65592	0.587082	0.546849	0.528315	0.505092	0.486777	0.474947	0.491535	0.486126	0.545824	0.59342	0.658544	0.680424	0.720128	0.750679	0.792027	0.856926	0.964646	1.0647	1.07835	1.12031	1.13265	1.20512	1.20292	1.18528	1.23504	1.22367	1.32644	1.24829	1.28745	1.24414	1.28713	1.29953	1.34321	1.16871	1.18712	1.15418	1.18453	1.21909	1.24236	1.19799	1.26466	1.24451	1.22118	1.20439	1.25195
13	1.06101	1.09074	1.32557	1.38789	1.37485	1.34655	1.37187	1.41599	1.40105	1.44092	1.40835	1.46011	1.44722	1.45495	1.45227	1.44885	1.4349	1.51669	1.42986	1.40754	1.33719	1.4024	1.41341	1.39656	1.2372	0.614354	0.409856	0.632126	0.605122	0.57535	0.505301	0.563379	0.438394	0.422117	0.401155	0.396919	0.388325	0.367738	0.373193	0.361356	0.322097	0.350552	0.364804	0.389785	0.426058	0.377939	0.355278	0.339043	0.332903
14	0.487633	0.4694	0.4718	0.467752	0.454646	0.479515	0.552544	0.576678	0.68617	0.678513	0.730169	0.754675	0.795869	0.854085	0.849675	0.850575	0.878318	0.893318	0.9565	0.956293	1.05379	1.08897	1.09191	1.09419	1.10458	1.07845	1.09946	1.00218	1.04716	1.02363	1.09335	1.11955	1.16426	1.12828	1.07335	1.14718	1.12389	1.06452	1.02818	0.959581	0.877885	0.883057	1.00711	1.00985	1.01315	1.05125	1.08507	1.09268	1.09326
15	0.920528	0.960052	1.0435	1.09525	1.12289	1.17371	1.18222	1.25116	1.29387	1.33407	1.3741	1.38435	1.35497	1.31289	1.24411	1.29718	1.25573	1.19349	1.14938	1.18179	1.18125	1.15887	1.34614	1.33048	1.27004	1.2789	1.27705	1.19615	1.15823	1.07989	1.11568	1.08535	1.1615	1.21815	1.11671	1.01857	0.890972	1.05195	1.02978	0.932079	1.17582	1.06473	1.23675	1.29666	1.27241	1.22588	1.24591	1.25324	1.32885
16	0.621113	0.650928	0.611414	0.598729	0.533111	0.490662	0.465474	0.444504	0.44235	0.455988	0.452712	0.457948	0.458799	0.481933	0.469564	0.490806	0.497245	0.469289	0.48403	0.468517	0.503495	0.515071	0.551412	0.557255	0.620061	0.632034	0.631328	0.650048	0.658284	0.691334	0.691523	0.797347	0.890019	0.928371	0.918196	0.926099	0.94326	0.92358	0.927587	0.960296	0.962905	0.880299	0.910464	0.907639	0.952928	0.919814	0.9038	0.763605	0.770563
17	1.04612	1.10518	1.18048	1.13314	1.08438	1.00291	1.18411	1.13454	1.17541	1.19588	1.25982	1.3561	1.46952	1.39409	1.37877	1.44839	1.35153	1.29433	1.25581	1.33595	1.3081	1.28515	1.30419	1.31875	1.30541	1.2245	1.08307	1.20786	1.27005	1.16693	1.19449	1.18985	1.02361	1.08346	1.42644	1.49396	1.40393	1.45994	1.36481	1.32569	1.42617	1.41391	1.30243	1.23537	1.25958	1.28546	1.42929	1.22547	1.3473
18	0.429075	0.426889	0.436962	0.432904	0.449473	0.444224	0.428204	0.431467	0.422364	0.406157	0.416867	0.414769	0.408272	0.407252	0.41574	0.412635	0.428814	0.436489	0.466065	0.502869	0.561238	0.586048	0.614753	0.64252	0.725456	0.774147	0.834254	0.873017	0.94757	0.947562	0.971623	1.01447	1.02502	1.0646	1.19083	1.20939	1.26055	1.27666	1.27705	1.29516	1.44339	1.38443	1.39507	1.43229	1.43716	1.40077	1.34392	1.40456	1.43939
19	0.413062	0.432039	0.420859	0.428834	0.405476	0.397803	0.385069	0.381592	0.393889	0.395338	0.414083	0.442865	0.44284	0.467148	0.444847	0.473207	0.518381	0.584151	0.509155	0.501866	0.491356	0.517512	0.530168	0.672021	0.640659	0.656058	0.795645	0.775933	0.75172	0.803118	0.914258	0.904703	0.840319	0.89073	0.835071	0.971509	1.05469	1.147	1.02047	0.911279	1.15842	0.963777	0.910929	1.1301	1.48397	1.50889	1.5363	1.51037	1.46439
20	0.436666	0.460535	0.43527	0.440717	0.444341	0.436945	0.429895	0.424337	0.405263	0.437986	0.399862	0.389983	0.362452	0.364143	0.358376	0.373213	0.38525	0.378502	0.407982	0.38749	0.409364	0.457024	0.621687	0.791116	0.800189	0.821611	0.849745	0.879382	0.910686	1.00514	1.04981	1.11533	1.19068	1.22001	1.27457	1.27496	1.24112	1.19821	1.28959	1.32523	1.2553	1.23307	1.28154	1.28521	1.25725	1.21164	1.17442	1.19668	1.13609
21	0.399704	0.425132	0.428	0.426253	0.437828	0.440195	0.428693	0.420751	0.442801	0.40186	0.421191	0.419432	0.40594	0.400227	0.386279	0.400816	0.405836	0.415127	0.408799	0.411892	0.409753	0.395864	0.395964	0.386117	0.40321	0.379329	0.385156	0.400455	0.385691	0.392331	0.394018	0.399071	0.407878	0.39514	0.385754	0.419443	0.369172	0.376318	0.391985	0.406434	1.25644	1.3443	1.28174	1.30466	1.32629	1.30382	1.32418	1.31894	1.33345
22	1.25239	1.31066	1.31197	1.36307	1.33121	1.3072	1.3629	1.41303	1.44951	1.37404	1.39496	1.45323	1.46706	1.53566	1.51446	1.52607	1.58139	1.52603	1.41737	1.40054	1.37437	1.44118	1.38079	1.32623	1.32923	1.17355	1.25761	1.36253	1.43013	1.37208	1.30496	1.32673	1.29983	1.35758	1.5197	1.43809	1.10182	0.512122	0.409868	0.544648	0.651195	0.684559	0.665405	0.572834	0.589249	0.559329	0.588982	0.58729	0.557626
23	0.37684	0.393415	0.422123	0.452267	0.52188	0.638989	0.707238	0.740212	0.786251	0.819568	0.828309	0.865059	0.943868	0.966079	1.02715	1.05004	1.21156	1.24915	1.23725	1.24308	1.31716	1.48314	1.45935	1.48435	1.44864	1.40249	1.25934	1.37692	1.46543	1.34296	1.21879	1.11169	1.21653	1.24007	1.27943	1.08449	1.24025	1.21769	1.17673	1.19935	1.12105	1.18668	1.25757	1.1947	1.18655	1.15523	1.18596	1.31517	1.28593
24	1.37951	1.4153	1.35445	1.39407	1.38351	1.35104	1.34179	1.28095	1.31859	1.3481	1.34943	1.28099	1.31589	1.30528	1.34506	1.3671	1.40628	1.41659	1.42904	1.4654	1.47474	1.37448	1.43831	1.47559	1.5047	1.67339	1.6234	1.54133	1.42473	1.3943	1.29771	1.22302	1.14408	1.07651	1.09574	1.04686	1.1009	1.11583	1.21748	1.23821	1.28587	1.35016	1.35714	1.32977	1.35499	1.3571	1.32749	1.27748	1.30222
25	0.738917	0.749897	0.76182	0.749483	0.772474	0.791268	0.758082	0.811816	0.875322	0.955311	0.966693	0.951183	0.932056	0.908697	0.977519	0.97367	0.981513	1.00308	0.949045	0.927647	1.01487	0.999423	1.01031	1.03993	0.971866	1.07048	1.07462	1.06276	1.02405	1.00746	1.06865	1.07495	1.10485	1.10745	1.13023	1.13084	1.1243	1.14637	1.06918	1.10752	1.11692	1.10327	1.14575	1.11859	1.12589	1.09008	1.11269	1.18067	1.09229
26	1.31048	1.36614	1.35569	1.40058	1.35573	1.3249		1.34186	1.44871	1.40229	1.29582	1.2827	1.30194	1.31982	1.36239	1.34943	1.46143	1.45519	1.49945	1.51667	1.4746	1.5338	1.50066	1.49568	1.4048	1.39159	1.31348	1.3666	1.30276	1.30582	1.28143	1.2451	1.26782	1.3761	1.47539	1.56852	1.53458	1.51759	1.43637	1.35517	1.37917	1.29392	1.28494	1.26497	1.23084	1.42383	1.52254	1.46753	1.46819
27	0.402802	0.418659	0.410911	0.4261	0.40993	0.439108	0.434839	0.454539	0.464727	0.496441	0.511313	0.557822	0.569149	0.590686	0.61825	0.624501	0.636158	0.698459	0.737646	0.772628	0.817518	0.882922	0.87616	0.896905	0.915322	0.891366	0.994568	1.01691	1.05028	1.06935	1.07243	1.06532	0.961213	1.01956	0.999814	1.0805	1.16895	1.23167	1.16845	1.13271	1.19622	1.17387	1.25432	1.24515	1.30837	1.28906	1.28741	1.31038	1.24304
28	0.623648	0.592097	0.632282	0.63124	0.627364	0.624794	0.625596	0.637097	0.655237	0.692269	0.738091	0.782051	0.780858	0.786369	0.802377	0.83263	0.876326	0.895193	0.918776	0.939898	0.947407	0.959045	0.955887	0.933433	0.946628	0.966767	0.994874	1.0286	1.15782	1.34186	1.38459	1.36093	1.3808	1.37931	1.4249	1.45664	1.52187	1.51771	1.49113	1.4756	1.40553	1.37596	1.39333	1.32101	1.27283	1.29088	1.29174	1.24584	1.22421
29	0.514491	0.608034	0.643047	0.594611	0.642987	0.662793	0.688178	0.697083	0.715998	0.804951	0.788236	0.949838	0.780971	0.887649	0.914803	0.895688	0.856951	0.815116	0.92041	0.873312	0.984043	1.07681	1.20856	1.17402	1.18443	1.18441	1.11429	1.14643	0.974555	1.12788	1.2384	1.25836	1.11628	0.967582	1.12518	1.19492	1.00677	1.11287	1.24385	1.41599	1.34207	1.04541	1.06058	1.14145	1.27732	1.35991	1.25822	1.32995	1.10614
30	0.672129	0.688535	0.733497	0.754387	0.705613	0.662123	0.843144	0.943179	0.966867	0.956989	0.855428	0.864331	0.864099	0.929109	0.906132	0.97183	1.00912	1.06404	1.07628	1.05748	1.09673	1.09124	1.14361	0.988908	1.02781	0.989453	0.939326	0.994381	1.04426	0.991607	1.07445	1.09424	1.04992	1.06323	1.05271	1.02516	1.01209	1.07386	1.06928	1.10617	1.07116	0.926057	0.970314	0.975714		1.15881	1.25695	1.33415	1.33397
31	0.791006	0.772388	0.723759	0.680287	0.716926	0.674745	0.749021	0.740861	0.785868	0.789845	0.813585	0.858664	0.891298	0.939223	0.946045	1.03303	1.069	1.0533	1.06691	1.16062	1.25747	1.26698	1.36045	1.37664	1.38149	1.33934	1.34276	1.35271	1.25658	1.23252	1.17359	0.973605	1.11946	1.26015	1.1205	1.25692	1.24341	1.09	1.20716	1.10612	0.950254	0.949547	0.990593	1.06288	1.15223	1.10624	0.999292	1.07535	1.08234
32	0.728248	0.907755	0.973164	0.927644	1.07564	0.89261	0.950328	1.08987	1.05803	1.08987	1.09215	1.18101	1.21873	1.24416	1.19784	1.10738	1.27088	1.07831	1.22229	1.48544	1.36983	1.30458	1.24718	1.23703	1.31477	1.2407	1.25576	1.21006	1.20516	1.25515	1.16722	1.13707	1.26964	1.26076	1.16529	1.20697	1.36092	1.21817	1.2459	1.382	1.25148	1.30266	1.2492	1.25968	1.28946	1.22758	1.18421	1.1694	1.17971
33	0.711429	0.674461	0.660141	0.625708	0.591722	0.587748	0.612642	0.60835	0.644372	0.627342	0.578311	0.536525	0.520367	0.513179	0.535107	0.547347	0.549452	0.545385	0.577156	0.606742	0.69503	0.745158	0.773009	0.790273	0.771194	0.79335	0.818819	0.781578	0.835173	0.95604	0.999795	1.01921	1.15096	1.23468	1.29702	1.23053	1.12661	1.13749	1.12301	1.23335	1.15666	1.14834	1.18868	1.05366	0.915465	0.91816	0.925215	0.990549	1.04012
34	1.14893	1.07814	1.1565	1.21306	1.18658	1.1795	1.15959	1.17817	1.13387	1.12123	1.15288	1.167	1.17023	1.20024	1.19552	1.26259	1.30144	1.33242	1.42691	1.39468	1.4218	1.4367	1.42851	1.41224	1.49269	1.49477	1.45506	1.4806	1.41403	1.36837	1.39655	1.37778	1.40592	1.35509	1.34888	1.38489	1.3525	1.37051	1.37536	1.38324	1.35446	1.34946	1.38009	1.3792	1.42828	1.44269	1.46099	1.4305	1.40188
35	0.759311	0.715693	0.741019	0.787142	0.730348	0.828622	0.801011	0.814213	0.758952	0.811839	0.765636	0.708128	0.734798	0.774661	0.739341	0.776593	0.779506	0.703797	0.728055	0.743961	0.769336	0.850904	0.770326	0.782905	0.802004	0.846189	0.918706	0.907676	0.965451	0.921178	0.94291	0.896288	0.951497	1.00668	0.929513	1.01959	0.912633	0.966906	0.958551	1.06207	1.0563	1.12908	1.13028	1.11041	1.1624	1.16819	1.14114	1.18489	1.21493
36	1.27575	1.32521	1.33111	1.35381	1.37175	1.204	1.17613	1.23204	1.41314	1.34964	1.31111	1.33224	1.29101	1.21556	1.3222	1.35296	1.36587	1.38348	1.43889	1.59064	1.57611	1.49354	1.56124	1.46958	1.4799	1.49273	1.43697	1.38393	1.41707	1.342	1.44093	1.43426	1.31624	1.01717	1.1967	1.3461	1.34979	1.1488	1.42752	1.467	1.31176	0.58477	0.570079	0.670903	0.789227	0.776866	0.752068	0.719886	0.602966
37	0.923746	0.843831	0.840326	0.880909	0.850247	0.910077	0.979839	0.957423	0.944236	1.02664	1.00931	0.978883	0.983109	0.976675	0.951639	0.972926	1.04349	0.96561	0.979058	1.00339	1.11293	1.10685	0.92698	0.926562	1.00719	1.02821	1.16141	1.12301	1.17576	1.17092	1.19912	1.17766	1.10308	1.19629	0.936454	0.793535	1.01582	1.24558	1.17652	1.21388	1.0719	1.08234	1.14689	1.21765	1.15867	1.25749	1.22571	1.18259	1.24682
38	1.11913	1.19942	1.16106	1.14428	1.1316	1.16038	1.13218	1.16559	1.16427	1.10757	1.04606	1.03552	1.09138	1.10093	1.06086	1.06454	1.17434	1.25399	1.19341	1.22221	1.16073	1.13388	1.12135	1.13257	1.08475	1.1486	1.14537	1.22358	1.24024	1.32164	1.31036	1.33971	1.4041	1.37797	1.39316	1.32077	1.29618	1.24969	1.18494	1.12044	1.13219	1.16122	1.16939	1.12573	1.05424	1.157	1.14184	1.3155	1.22128
39	1.17006	1.18211	1.16915	1.17278	1.0455	1.19432	1.12515	1.15584	1.17353	1.25303	1.21127	1.26101	1.21936	1.17828	1.20399	1.16222	1.21769	1.27413	1.11493	0.986022	1.03574	1.08195	1.08106	1.06024	1.08621	1.08533	1.04299	1.16224	1.15761	1.05686	1.09474	1.07477	1.04418	1.24757	1.22136	1.18873	1.11279	1.11936	1.24327	1.21345	1.15324	1.19986	1.32672	1.4109	1.42246	1.42048	1.39267	1.4336	1.43001
40	0.504533	0.5516	0.576537	0.627241	0.648091	0.657715	0.652902	0.653928	0.651346	0.622051	0.590796	0.620574	0.552331	0.584605	0.53279	0.56651	0.591686	0.583037	0.59535	0.624404	0.664386	0.699918	0.74877	0.794707	0.824088	0.852486	0.88525	0.941774	1.05348	1.05903	1.04565	1.08988	1.08446	1.12657	1.02914	1.05698	0.942791	1.01152	1.09514	1.05295	1.0272	1.03227	1.11831	1.07618	1.05381	0.992081	1.03595	1.04844	0.971499
41	0.899871	1.01005	1.05369	1.0358	0.972405	0.930949	0.915742	0.94169	0.96757	0.998389	1.06538	1.08256	1.09664	0.625297	0.770424	0.778189	0.73031	0.639792	0.651149	0.651895	0.64473	0.672078	0.693932	0.726578	0.773182	0.844844	0.893307	0.949486	0.910035	0.981756	0.98687	1.01638	1.03513	1.06538	1.01943	1.1171	1.19349	1.21181	1.20331	1.21032	1.13435	1.22108	1.29778	1.24147	1.22523	1.29009	1.26752	1.33107	1.33722
42	0.287648	0.301144	0.320766	0.311785	0.324028	0.320406	0.314863	0.315007	0.323806	0.318625	0.338764	0.373283	0.402239	0.435063	0.418462	0.448418	0.46735	0.472073	0.476524	0.450221	0.485999	0.559454	0.641974	0.686825	0.736465	0.802301	0.849401	0.894551	0.942838	0.960397	1.00224	0.995127	1.03619	1.08809	1.12485	1.16783	1.24324	1.23404	1.28661	1.30712	1.23314	1.28398	1.31371	1.29729	1.33734	1.29668	1.24439	1.14562	1.14758
43	1.11439	1.1126	1.05501	1.11562	1.06644	0.991281	1.09451	1.20683	1.25422	1.21982	1.16607	1.14965	1.12036	1.11146	1.11076	1.2161	1.30151	1.23051	1.11793	1.18545	1.17891	1.24498	1.29765	1.32629	1.23187	1.33751	1.24054	1.30065	1.34368	1.40128	1.39697	1.38507	1.47196	0.774506	0.644983	0.65081	0.770544	0.670653	0.618759	0.556798	0.534535	0.518632	0.53572	0.506025	0.515969	0.528662	0.556875	0.55505	0.598962
44	0.502697	0.537692	0.545467	0.546567	0.562862	0.576786	0.636238	0.655822	0.712355	0.754749	0.804732	0.812659	0.855107	0.860317	0.906343	0.937062	0.977737	1.09811	1.16545	1.23245	1.26964	1.20374	1.2062	1.24476	1.24794	1.1265	1.17615	1.14524	1.12059	1.15539	1.12968	1.10542	1.18565	1.1358	1.144	1.1618	1.21369	1.13165	1.07871	1.12576	0.986218	0.98439	1.11502	1.12285	1.15596	0.924059	1.04421	0.989641	1.0616
45	0.631911	0.620183	0.604071	0.617315	0.611715	0.599394	0.509034	0.526719	0.56439	0.556401	0.565866	0.54499	0.54802	0.530875	0.51375	0.539842	0.541165	0.561916	0.560286	0.547174	0.576774	0.595745	0.609705	0.639966	0.681957	0.728458	0.784485	0.792622	0.786883	0.782807	0.808839	0.877691	0.952492	0.973969	1.03877	1.06428	1.12322	1.17412	1.23924	1.26506	1.2174	1.29883	1.26595	1.22691	1.27364	1.22926	1.27146	1.29771	1.31145
46	1.05083	1.06781	1.09427	1.08904	1.10162	1.13691	1.12323	1.15637	1.22668	1.18753	1.24095	1.18547	1.18282	1.12735	1.18048	1.20405	1.21312	1.24071	1.23374	1.2592	1.28096	1.23567	1.21162	1.2943	1.29386	1.23185	1.21187	1.2204	1.27695	1.25218	1.27302	1.29146	1.21936	1.20014	1.14755	1.16911	1.04832	1.0679	1.13066	1.16714	1.13458	1.14599	1.25944	1.29884	1.32577	1.24345	1.25209	1.26627	1.23383
47	0.644576	0.690296	0.700681	0.495532	0.545309	0.48248	0.478934	0.488947	0.498245	0.499578	0.48362	0.46181	0.506486	0.5235	0.571145	0.560768	0.587974	0.634818	0.692219	0.71945	0.746182	0.752873	0.807737	0.863968	0.888207	0.928312	1.01066	1.07374	1.08762	1.24755	1.3939	1.39313	1.32247	1.18279	1.2229	1.22945	1.28573	1.24931	1.27322	1.26067	1.21474	1.13195	1.22144	1.17494	1.20448	1.17522	1.20665	1.20747	1.18697
48	1.17301	1.23301	1.23783	1.30419	1.29559	1.31772	1.06514	1.19901	1.13897	1.14986	1.20081	1.23737	1.24626	1.3331	1.31789	1.25234	1.21883	1.19219	1.28451	1.25123	1.2404	1.26808	1.28152	1.29004	1.32492	1.2783	1.27068	1.39108	1.46245	1.41385	1.44867	1.43018	1.39415	1.23665	1.27837	1.37433	1.2714	1.39175	1.33968	1.28488	1.38923	1.33091	1.34399	1.37855	1.39162	1.42798	1.60498	1.7486	1.81451
49	0.527687	0.58426	0.588762	0.614325	0.608972	0.561231	0.545221	0.532433	0.560684	0.524469	0.475457	0.490993	0.508251	0.531282	0.555853	0.599388	0.659071	0.620575	0.67313	0.678262	0.717456	0.734194	0.783839	0.768979	0.79852	0.83319	0.887852	0.917084	0.868965	0.856895	0.914961	0.986287	1.03179	1.05961	1.09763	1.12377	1.13347	1.10981	1.16743	1.19086	1.05303	1.07998	1.087	1.07579	1.06994	1.05854	1.1172	1.10381	1.15665
50	0.484305	0.501067	0.488905	0.488455	0.494902	0.534857	0.534775	0.540915	0.552524	0.513431	0.541481	0.559833	0.620158	0.662807	0.743842	0.775337	0.832348	0.872868	0.932305	0.949879	1.04667	1.04234	1.04295	1.01093	0.99725	1.05366	0.955932	1.04629	1.05037	1.04069	1.03204	1.04062	1.10428	1.14473	1.13051	1.09977	1.08441	1.08074	1.10019	1.19996	1.12716	1.13448	1.06644	1.10155	1.05277	1.12909	1.16314	1.1884	1.16368
51	0.489257	0.565338	0.653634	0.71957	0.745301	0.781469	0.845768	0.885176	0.919426	0.968234	0.959533	1.04155	1.12492	1.1781	1.21336	1.2377	1.14119	1.05272	1.05513	1.05202	1.06446	1.05932	1.11777	1.12031	1.06957	1.16951	1.13147	1.11632	1.10719	1.21264	1.17533	1.20375	1.14206	1.19611	1.24506	1.22004	1.19993	1.1859	1.1971	1.26078	1.14976	1.17527	1.19832	1.20744	1.2329	1.26458	1.25853	1.2377	1.17782
52	0.755138	0.776154	0.801732	0.792368	0.807175	0.826139	0.83499	0.827558	0.867572	0.908594	0.956417	1.0149	1.00194	1.12718	1.17576	1.24105	1.24247	1.22127	1.25387	1.18576	1.17165	1.18192	1.18715	1.13417	1.10456	1.09226	1.14293	1.13434	1.08669	1.12931	1.17812	1.1836	1.19867	1.18314	1.2604	1.21697	1.12883	1.19516	1.17209	1.16715	0.962715	1.11845	1.11562	1.13465	1.02929	1.06959	1.1528	1.14534	1.21244
53	1.88894	1.76256	1.75566	1.64875	1.64364			1.54901	1.68663	1.94547	1.93525	1.58304	1.52741	1.61294	1.54603	1.29356	1.37835	1.45534	1.40712	1.41029	1.51849	1.62967	1.62794	1.60061	1.36961	1.11071	1.11202	1.04036	1.17024	1.15285	1.20761	1.31655	1.30785	1.33296	1.28006	1.14839	1.18999	1.23573	1.26446	1.30992	1.23647	1.28164	1.3126	1.24135	1.34907	1.2968	1.27071	1.25789	1.23461
54	0.325248	0.31216	0.334091	0.350644	0.337952	0.359877	0.355195	0.344952	0.347721	0.330967	0.344922	0.32296	0.310211	0.311228	0.303345	0.30775	0.30961	0.305215	0.301086	0.304611	0.310416	0.303241	0.297184	0.274063	0.282785	0.335425	0.383762	0.384514	0.439943	0.43598	0.357295	0.318743	0.312722	0.340679	0.366685	0.391911	0.476631	0.55439	0.613035	0.668547	1.11109	1.11637	1.13161	1.14974	1.18908	1.14611	1.19343	1.22565	1.24658
55	0.715674	0.722109	0.749495	0.765402	0.79156	0.777187	0.843469	0.912269	0.903017	0.878179	0.856641	1.02494	1.13136	1.13823	1.13763	1.22924	1.25933	1.16944	1.23754	1.27907	1.25427	1.27418	1.17448	1.18711	1.14506	1.3757	1.33006	1.32371	1.27423	1.25765	1.33948	1.32628	1.29836	1.26568	1.25906	1.32111	1.21808	1.23852	1.19348	1.44532	1.40031	1.20629	1.08403	1.01651	1.03543	1.08481	1.13471	1.03282	1.00779
56	1.10559	1.09436	1.15742	1.18092	1.20834	1.19183	1.24753	1.24123	1.14521	1.07123	1.11338	1.12094	1.11574	1.12971	1.1932	1.17435	1.21161	1.13963	1.17915	1.18544	1.07675	1.14496	1.15898	1.19674	1.25815	1.34667	1.28576	1.36746	1.37942	1.38807	1.3801	1.4051	1.47383	1.50518	1.56505	1.5487	1.5474	1.57309	1.6161	1.62201	1.20569	1.17527	1.25182	1.26822	1.34636	1.28695	1.28078	1.24607	1.21507
57	0.832691	0.845844	0.907884	0.917553	0.898684	0.922928	0.937011	0.950238	0.95391	1.05402	1.10015	1.17114	1.16016	1.11102	1.10023	1.15951	1.13184	1.15663	1.16534	1.22112	1.17067	1.1718	1.1853	1.18997	1.12577	1.17858	1.14206	1.13104	1.19509	1.27583	1.20559	1.2104	1.23235	1.23064	1.2534	1.24646	1.25496	1.29443	1.33508	1.29683	1.30161	1.28938	1.29353	1.31334	1.35082	1.27787	1.27841	1.29473	1.25963
58	0.857826	0.889379	0.883743	0.884502	0.878133	0.931352	1.00106	1.06324	1.08778	1.08364	1.06704	1.15616	1.21877	1.20855	1.19747	1.19817	1.22774	1.21806	1.22345	1.29834	1.25775	1.31055	1.29996	1.2419	1.27152	1.33842	1.33945	1.42345	1.35794	1.38146	1.34557	1.38365	1.27001	1.29169	1.12667	1.22859	1.28451	1.4433	1.48913	1.54618	1.45923	1.4145	1.34553	1.44292	1.46777	1.39756	1.40518	1.39387	1.39112
59	0.543376	0.532684	0.521124	0.492612	0.453612	0.445394	0.453331	0.484938	0.508036	0.513989	0.52627	0.547084	0.546798	0.586356	0.637231	0.619466	0.620836	0.617434	0.60488	0.668793	0.673877	0.692039	0.790804	0.846844	0.803477	0.861375	0.862941	0.978086	0.943227	0.973414	0.965104	0.971375	1.02365	0.931702	0.957769	1.0359	1.07089	1.15748	1.1902	1.11558	1.02193	1.01966	1.07629	1.03849	1.08926	1.10292	1.14125	1.18028	1.17808
60	1.17685	1.13146	1.14432	1.19756	1.22057	1.20044	1.20222	1.16529	1.20281	1.14156	1.17394	1.27865	1.2855	1.30897	1.3117	1.254	1.34409	1.33667	1.30225	1.34184	1.35278	1.30223	1.26663	1.30314	1.25351	1.19713	1.36144	1.31312	1.2612	1.19072	1.15943	1.18349	1.21609	1.08436	1.2037	1.13877	1.18214	1.16407	1.19481	1.24499	1.29646	1.23734	0.646596	0.665714	0.669356	0.621468	0.696792	0.676185	0.668651
61	1.07042	0.976006	1.08778	1.14834	1.17985	1.18845	1.235	1.28967	1.21763	1.27144	1.24995	1.31529	1.29935	1.35725	1.39883	1.40953	1.37305	1.39874	1.28299	1.36411	1.36348	1.25266	1.30452	1.32891	1.3072	1.29169	1.31907	1.36532	1.3021	1.22701	1.09687	1.08923	1.2065	1.37481	1.32651	1.30759	1.32459	1.34324	1.28514	1.15168	1.10899	1.22902	1.30502	1.28936	1.36567	1.34577	1.38244	1.42556	1.45372
62	1.10559	1.09436	1.15742	1.18092	1.20834	1.19183	1.24753	1.24123	1.14521	1.07123	1.11338	1.12094	1.11574	1.12971	1.1932	1.17435	1.21161	1.13963	1.17915	1.18544	1.07675	1.14496	1.15898	1.19674	1.25815	1.34667	1.28576	1.36746	1.37942	1.38807	1.3801	1.4051	1.47383	1.50518	1.56505	1.5487	1.5474	1.57309	1.6161	1.62201	1.20569	1.17527	1.25182	1.26822	1.34636	1.28695	1.28078	1.24607	1.21507
63	1.10501	1.13323	1.16621	1.18029	1.21783	1.22906	1.23902	1.22648	1.34737	1.32053	1.38663	1.37645	1.3503	1.33214	1.30731	1.30891	1.4162	1.32714	1.38155	1.36527	1.31755	1.33565	1.41205	1.43461	1.45947	1.53068	1.48623	1.53919	1.54947	1.64325	1.53254	1.55353	1.57231	1.57402	1.68508	1.7202	1.7098	1.64203	1.70371	1.74044	1.68492	1.68212	1.63008	1.55157	1.51103	1.50794	0.608298	0.552107	0.470416
64	0.645604	0.643916	0.649008	0.746732	0.762822	0.72912	0.798075	0.857154	0.789897	0.820964	0.874364	0.88677	0.923587	0.967966	0.961272	0.972361	1.06305	0.96353	0.90078	0.898033	1.05775	1.08081	1.05922	1.125	1.14797	1.13172	1.06535	1.08576	1.14979	1.17222	1.10429	1.12002	1.14298	1.10375	1.061	1.07714	1.18445	1.11883	1.14477	1.21286	1.20709	1.03724	1.13762	0.982215	1.10404	1.15416	1.17062	1.21402	1.23105
65	1.03982	1.11329	1.11871	1.14247	1.15389	1.26679	1.24922	1.21709	1.35522	1.41188	1.38748	1.38267	1.46331	1.40736	1.40413	1.46991	1.43985	1.41608	1.57492	1.40443	1.54466	1.61577	1.5761	1.49661	1.61682	1.47761	1.49768	1.49657	1.51252	1.46901	1.4603	1.39088	1.31742	1.55775	1.48725	1.49424	1.48942	1.29738	1.49256	1.07151	0.598017	0.629333	0.830087	0.803046	0.760396	0.607337	0.553174	0.617703	0.705258
66	0.907386	0.91969	0.957739	0.928965	0.930029	0.983564	0.961424	0.958769	0.939946	0.950982	0.960542	0.968683	0.991604	1.00531	0.956466	0.988618	0.985874	0.92513	1.01726	1.00955	1.02761	0.996425	1.02889	1.02433	1.06015	1.07323	1.12967	1.15888	1.10317	1.19233	1.1898	1.22879	1.23279	1.26167	1.2996	1.24868	1.32031	1.30792	1.38055	1.34765	1.3601	1.33176	1.30421	1.30441	1.28256	1.33976	1.40092	1.39025	1.27679
67	0.604434	0.67001	0.72105	0.776935	0.805362	0.807208	0.819836	0.848306	0.888841	0.917969	0.943409	0.951172	1.01533	1.08181	1.12806	1.14914	1.23233	1.25914	1.30494	1.25027	1.19924	1.234	1.23989	1.20217	1.19207	1.11559	1.07976	1.00459	1.05051	1.0522	1.06566	1.09657	1.0838	1.06538	1.10884	1.12746	1.21317	1.21175	1.22326	1.20461	1.15383	1.17863	1.15305	1.18055	1.1851	1.17096	1.1338	1.13257	1.19381
68	0.99824	1.12391	1.0488	1.11728	1.18414	1.14487	1.11925	1.1656	1.20889	1.23414	1.20896	1.2479	1.28435	1.25355	1.26068	1.28469	1.34161	1.37232	1.37305	1.23746	1.22815	1.25947	1.32268	1.33428	1.28724	1.25864	1.30061	1.37233	1.39213	1.44779	1.37426	1.37973	1.28109	1.2099	1.29648	1.32903	1.44041	1.18119	1.31279	1.27949	1.29263	1.28414	1.33561	1.25101	1.41747	1.44539	1.40544	1.4218	1.20372
69	0.75432	0.813244	0.781268	0.821704	0.891257	0.962079	1.01817	0.876974	0.847431	0.824391	0.817408	0.852824	0.901623	0.939167	0.967892	0.965783	0.995214	1.09343	1.212	1.27843	1.27136	1.26186	1.04847	1.17055	1.262	1.13794	1.19793	1.18715	1.06656	1.01938	1.07875	1.19687	1.21487	1.19114	1.09557	1.10231	1.11782	1.0742	1.12411	1.11625	0.994369	1.05085	1.17068	1.20806	1.22502	1.30608	1.34732	1.39508	1.38404
70	0.913393	0.954281	0.963581	1.01578	0.978381	1.06745	1.1053	1.18851	1.28483	1.27469	1.32346	1.37158	1.4643	1.42467	1.2989	1.23258	1.29487	1.29944	1.27336	1.29907	1.29618	1.23502	1.15237	1.17364	1.09238	1.21225	1.21535	1.3009	1.30729	1.32926	1.33063	1.41125	1.43338	1.21635	1.22136	1.36254	1.5112	1.50147	1.33955	1.43558	1.31625	1.4991	1.50105	1.51697	1.56615	1.54252	1.52256	1.6207	1.61312
71	1.08755	1.07395	1.08377	1.08909	1.183	1.2274	1.30433	1.36628	1.3955	1.40497	1.43404	1.48368	1.38371	1.2629	1.32378	1.39478	1.3412	1.29222	1.24038	1.37044	1.34681	1.33128	1.39709	1.4035	1.42791	1.42055	1.41642	1.37243	1.39046	1.36976	1.37549	1.34178	1.29299	1.31975	1.31146	1.33874	1.32935	1.37718	1.35327	1.41906	1.40134	1.39073	1.34513	1.44056	1.42663	1.42784	1.42434	1.45226	1.43841
72	0.548086	0.576789	0.546078	0.594251	0.599321	0.636563	0.684162	0.758069	0.783174	0.807646	0.807287	0.878718	0.91005	0.912439	0.964072	0.940943	1.00647	0.983948	1.09612	1.0805	1.11443	1.18594	1.1895	1.19352	1.15238	1.12145	1.13286	1.10709	1.13508	1.09822	1.09165	1.08814	1.18532	1.15009	1.16045	1.17589	1.20083	1.21719	1.25657	1.20464	1.19939	1.25953	1.31978	1.28994	1.34343	1.37617	1.37708	1.36572	1.33085
73	0.566997	0.573077	0.596968	0.613423	0.611056	0.676627	0.683458	0.69384	0.718847	0.774266	0.825768	0.868757	0.877344	0.873505	0.879312	0.945394	0.983078	1.00971	1.03442	1.03861	1.01881	1.08631	1.11003	1.11554	1.10469	1.05465	1.07067	1.1508	1.14811	1.21311	1.28171	1.40792	1.37728	1.37087	1.38185	1.35362	1.38896	1.34765	1.38735	1.39362	1.33468	1.37531	1.37002	1.368	1.32185	1.34907	1.35135	1.2029	1.08034
74	1.15621	1.17648	1.194	1.14185	1.15001	1.079	1.1888	1.16446	1.09091	1.15896	1.21853	1.1544	1.11093	1.07303	1.10906	1.11144	1.18317	1.3315	1.34426	1.46334	1.34883	1.29323	1.29233	1.33875	1.31942	1.39663	1.39337	1.46778	1.50258	1.36918	1.36017	1.35314	1.33007	1.44683	1.33955	1.52422	1.53432	0.777803	0.584407	0.86633	0.799395	0.669802	0.561626	0.494259	0.456267	0.481049	0.460427	0.467926	0.473306
75	0.753928	0.474111	0.463818	0.758202	0.775481		1.14534	0.832691	1.27214	1.33158	1.35267	1.35323	1.43219	1.481	1.61266	1.46098	1.3806	1.39318	1.41105	1.58102	1.74973	1.54562	1.44479	1.42221	1.36036	1.32737	1.2782	1.25719	1.37324	1.37779	1.43017	1.38577	1.31807	1.35091	1.41361	1.32641	1.1595	1.28232	1.29718	1.34852	1.1583	0.95616	1.03483	1.18231	1.3861	1.57749	1.62626	1.54401	1.57118
76	1.6108	1.28621	0.862834	0.741444	0.853888	0.738806	1.1364	1.03292	1.09843	0.914243	1.03794	0.992242	0.890906	1.02412	0.914674	0.971408	0.794091	0.79962	0.996187	1.07555	1.41793	1.14291	1.44492	1.33811	1.22849	1.34252	1.32748	1.16194	0.989078	1.16561	1.14315	1.24132	1.18389	0.985962	0.944337	1.00248	0.910714	1.09514	0.829149	1.0418	1.26312	1.24981	1.23998	1.38388	1.39858	1.36608	1.31743	1.33909	1.35689
77	1.02895	0.779107	0.962644	0.755851	0.737	0.776193	0.824885	0.735987	0.725736	0.776067	0.814316		0.954668	1.00175	1.12287	1.17999	1.13175	1.10887	1.16408	1.17507	1.19079	1.18773	1.21703	1.17559	1.25344	1.24824	1.21293	1.16532		1.21521	1.30981	1.25216	1.25702	1.29104	1.43752	1.36832	1.36429	1.41599	1.42508	1.40209	1.35493	1.38454	1.32933	1.35002	1.34577	1.30895	1.28178	1.26995	1.30209
78	0.942188	1.01021	1.23897	1.2055	1.20501	1.2488	1.3561	1.30512	1.27704	1.16598	0.972427	1.1066	1.01725	1.27341	1.08474	1.24774	1.29636	1.3941	1.34333	1.32678	1.15713	1.23571	1.37251	1.10083	0.923989	1.16162	1.21028	1.32902	1.37411	1.42946	1.54497	1.28664	1.21558	1.29354	1.22267	1.36579	1.28062	0.639605	0.617599	0.776148	0.781177	0.657724	0.650718	0.603455	0.583973	0.582214	0.599907	0.594503	0.621009
79	1.07833	1.13478	1.1904	1.23053	1.18308	1.24373	1.196	1.15794	1.21534	1.20279	1.19313	1.24298	1.25073	1.11617	1.04756	1.10157	1.07703	1.10978	1.21174	1.06903	1.01099	1.1455	0.891138	1.10971	1.1809	1.24384	1.10359	1.0848	1.15029	1.09916	1.11522	1.31646	1.29918	1.22198	0.997614	0.436054	0.60404	0.663507	0.604159	0.655777	0.537708	0.48014	0.407054	0.359367	0.518857	0.511435	0.50981	0.516773	0.516683
80	1.01331	0.874975	1.05444	1.12243	1.10596	1.19372	1.26805	1.26118	1.30688	1.35773	1.34673	1.27062	1.28207	1.3271	1.24969	1.275	1.19084	1.26549	1.28787	1.32901	1.38322	1.4824	1.49905	1.50957	1.50909	0.303975	0.308777	1.56149		1.64432	1.63477	1.5144	1.51683	1.48775	1.52552	1.52684	1.48695	1.42853	1.57654	1.56798	1.55633	1.54836	1.54596	1.54545	1.57853	1.63989	1.64191	1.70135	1.69168
81	0.506067	0.518117	0.515916	0.498996	0.502605	0.488802	0.513045	0.501187	0.516749	0.500997	0.511224	0.482989	0.481062	0.464028	0.478289	0.489869	0.508444	0.509491	0.483248	0.477384	0.482493	0.4891	0.466289	0.450051	0.490397	0.473894	0.482389	0.438698	0.453732	0.434541	0.477484	0.499265	0.471147	0.499248	0.541384	0.592885	0.787961	0.700527	0.628042	0.535553	0.514855	0.502735	0.516099	0.569127	0.572291	0.567235	0.595621	0.629143	0.657392
82	0.413754	0.454217	0.45851	0.480476	0.498312	0.495525	0.484344	0.461786	0.436318	0.4564	0.423999	0.428312	0.410881	0.414922	0.407681	0.402348	0.427211	0.462263	0.484801	0.532096	0.589441	0.632922	0.659545	0.663357	0.645878	0.670164	0.655052	0.655988	0.664141	0.692019	0.740967	0.756327	0.811187	0.836772	0.86335	0.994887	1.02753	1.12019	1.18782	1.23431	1.16317	1.18021	1.1747	1.23021	1.18584	1.10635	1.11886	1.03787	1.03166
83	0.714011	0.801982	0.87848	0.984183	1.03323	1.06006	1.09954	1.17642	1.19972	0.988448	0.95895	0.998487	1.02122	1.04355	1.0426	1.05352	1.08022	1.07654	1.10702	1.03107	0.99132	0.929969	1.03871	1.08723	1.10039	1.2061	1.21298	1.18062	1.21592	1.28367	1.25336	1.2636	1.28092	1.25516	1.19968	1.13893	1.00054	1.19376	1.27308	1.35088	1.22366	1.2446	1.2753	1.23983	1.29738	1.35618	1.26249	1.25986	1.14001
84	0.404257	0.403302	0.408318	0.408424	0.405765	0.435832	0.477604	0.533939	0.556805	0.565022	0.569104	0.618983	0.627933	0.639057	0.68252	0.732001	0.776363	0.847671	0.887843	0.941918	1.05564	1.06998	1.05204	1.12475	1.12998	1.16345	1.10416	1.05018	1.05788	1.0245	1.05594	1.03543	1.01833	1.05848	0.96242	0.890984	0.966131	1.02282	1.00105	1.02672	1.00945	1.01928	0.95711	1.03536	0.944557	0.961151	1.03181	1.1005	1.20091
85	1.42806	1.56262	1.60246	1.67466	1.64599	1.40051	1.55794	1.68591	1.33548	1.04988	0.680363	0.647389	0.737789	0.877038	0.758041	0.684294	0.645197	0.621817	0.642482	0.621113	0.679425	0.702481	0.778033	0.789532	0.868141	0.916394	0.918069	0.952044	1.00013	1.04843	1.01274	1.05807	1.07059	1.06723	1.16191	1.2019	1.19744	1.0894	1.11235	1.10977	1.0992	1.13074	1.16721	1.19992	1.19157	1.1173	1.10111	1.10796	1.18409
86	0.500985	0.521517	0.474596	0.484909	0.482178	0.472064	0.464239	0.461023	0.461776	0.471191	0.451491	0.480468	0.457845	0.456426	0.471159	0.48664	0.479346	0.503384	0.519426	0.507445	0.516585	0.50597	0.507683	0.485959	0.493586	0.47714	0.478834	0.476303	0.462729	0.448605	0.453133	0.459046	0.470354	0.488956	0.509497	0.538899	0.544236	0.526524	0.476397	0.47337	1.37943	1.32214	1.32967	1.35648	1.35114	1.30712	1.3249	1.3079	1.29273
87	1.10586	1.13791	1.07617	1.08963	1.0679	1.04889	0.945036	1.02416	1.04071	1.15605	1.00968	1.038	1.08423	1.06207	1.14557	1.34379	1.27939	1.23096	1.22034	1.19084	1.23196	1.24297	1.26052	1.25326	1.44125	1.49134	1.47227	1.37393	1.33071	1.27925	1.45984	1.4948	1.51931	1.41445	1.37575	1.35303	1.42367	1.43765	1.22189	1.28626	1.25668	1.39814	1.43186	1.50544	1.53452	1.51068	1.46354	1.49683	1.41557
88	0.506067	0.518117	0.515916	0.498996	0.502605	0.488802	0.513045	0.501187	0.516749	0.500997	0.511224	0.482989	0.481062	0.464028	0.478289	0.489869	0.508444	0.509491	0.483248	0.477384	0.482493	0.4891	0.466289	0.450051	0.490397	0.473894	0.482389	0.438698	0.453732	0.434541	0.477484	0.499265	0.471147	0.499248	0.541384	0.592885	0.787961	0.700527	0.628042	0.535553	0.514855	0.502735	0.516099	0.569127	0.572291	0.567235	0.595621	0.629143	0.657392
89	1.25815	1.32196	1.38201	1.46531	1.43317	1.45338	1.48737	1.51014	1.45488	1.43204	1.3744	1.43975	1.45996	1.40042	1.36766	1.4142	1.4389	1.42666	1.40458	1.47297	1.48623	1.52331	1.47192	1.50727	1.49288	1.38298	1.36779	1.33132	1.3281	1.40142	1.48963	1.51638	0.755653	0.645488	0.72426	0.666374	0.676204	0.643633	0.647128	0.638692	0.659751	0.687148	0.686156	0.720667	0.74102	0.775287	0.743152	0.75456	0.790194
90	1.44888	1.45127	1.48667	1.44662	1.43794	1.53886	1.49881	1.47283	1.39914	1.4383	1.44845	1.44587	1.44667	1.44921	1.48259	1.41321	1.46498	1.44238	1.29264	1.53398	1.63731	1.5777	1.60457	1.50186	1.68648	1.69633	0.60503	0.622974	0.63243	0.811397	0.748721	0.703247	0.645702	0.607426	0.621463	0.63966	0.645731	0.68492	0.725138	0.754979	0.715058	0.725334	0.827512	0.916353	0.917588	0.928837	0.94351	1.01559	0.976649
91	1.16415	1.33339	1.39657	1.53183	1.59012	1.54135	1.54792	1.37525	1.32352		1.58311	1.75871	1.78032	1.63609	1.50397	1.4479	1.42251	1.41037	1.26508	1.20094	1.25111	1.25382	1.40589	1.42909	1.42292	1.22566	1.31536	1.46078	1.54496	1.41037	1.45755	1.3706	1.43541	1.49157	0.98366	0.710569	0.69625	0.694096	0.82462	0.751567	0.657943	0.580541	0.524475	0.548047	0.55963	0.525693	0.558313	0.54192	0.59742
92	0.989192	1.15152	0.957936	0.911312	1.04488	1.23415	1.26134	1.30873	1.29301	1.28788	1.53015	1.4575	1.43897	1.41155	1.3479	1.36733	1.38401	1.38409	1.45071	1.33381	1.36857	1.22137	1.38197	0.849766	0.733008	0.576228	0.798288	0.879687	0.828875	0.734052	0.641486	0.576565	0.54863	0.533268	0.513924	0.48743	0.490201	0.550301	0.523541	0.563786	0.611275	0.681001	0.752117	0.792365	0.794386	0.813206	0.879234	0.900728	0.954087
93	1.10182	1.07641	1.08117	1.12431	1.11724	1.09905	1.09971	1.10399	1.03161	1.11521	1.21768	1.19627	1.15054	1.15496	1.2296	1.22238	1.19806	1.11215	1.1762	1.26361	1.28581	1.29246	1.25471	1.25954	1.2873	1.22826	1.22645	1.35219	1.28689	1.27979	1.33459	1.25307	1.28053	1.32576	1.34219	1.35457	1.29094	1.24524	1.29822	1.44997	1.23235	1.16829	1.27722	1.27667	1.3493	1.22419	1.23258	1.25422	1.09807
94	0.831493	0.834979	0.852269	0.882228	0.91268	0.966245	1.015	1.02755	1.06637	1.09291	1.03948	1.07442	1.08118	1.08188	1.08534	1.00502	1.13746	1.11272	1.04079	1.02185	1.05093	1.08455	1.03966	0.978469	0.946341	0.954911	0.998005	1.00799	0.982596	1.02423	1.02143	1.04466	1.06182	1.13499	1.01913	1.0215	1.09412	0.942172	1.04544	1.087	1.0456	1.10393	1.09822	1.0683	1.13229	0.933226	0.967813	1.03305	1.01272
95	1.11906	1.15615	1.03635	1.08327	1.057	1.08142	1.1186	1.21484	1.18278	1.12264	1.09715	1.20939	1.19785	1.24004	1.2768	1.31386	1.31326	1.32564	1.37829	1.45468	1.30248	1.27957	1.33152	1.36445	1.38175	1.34293	1.2792	1.32716	1.40127	1.40548	1.36225	1.41955	1.36281	1.41187	1.42137	1.26757	1.39941	1.44819	1.34377	1.36348	1.30926	1.1693	1.34632	1.34155	1.34562	1.3827	1.3576	1.44845	1.53242
96	0.455654	0.451244	0.429078	0.402137	0.400768	0.416914	0.419615	0.392163	0.402779	0.421402	0.458855	0.509664	0.53191	0.566032	0.585066	0.620267	0.633084	0.655259	0.695527	0.705802	0.79889	0.818382	0.802352	0.873154	0.891416	0.953315	0.98318	0.991109	1.00833	0.954335	1.01957	1.07527	1.0545	0.976025	1.0421	1.05513	1.04614	1.0834	1.00726	1.00231	1.00978	0.956299	1.03198	1.00511	1.01049	0.971282	0.99888	0.973906	0.977451
97	1.2741	1.35356	1.29622	1.19838	1.16081	1.1378	1.12541	1.16577	1.17463	1.15319	1.24242	1.31866	1.2936	1.25404	1.26102	1.26733	1.20515	1.24983	1.27566	1.26206	1.2193	1.21642	1.29543	1.14339	1.31795	1.1777	1.3129	1.25614	1.28757	1.26455	1.27486	1.28154	1.23505	1.34385	1.26306	1.25256	1.2494	1.29369	1.34612	1.33987	1.38278	1.28401	1.38661	1.41783	1.34942	1.53369	1.35732	0.827651	0.699852
98	1.28711	1.2876	1.26	1.34694	1.4328	1.45462	1.36282	1.21833	1.23297	1.21022	1.28938	1.31695	1.27871	1.33933	1.3977	1.39374	1.41056	1.42622	1.43442	1.37995	1.36638	1.33757	1.41781	1.48407	1.54205	1.5398		0.774824	0.694519	0.737907	0.906652	0.832776	0.706652	0.562901	0.537029	0.520191	0.509751	0.490103	0.466848	0.477519	0.452089	0.443674	0.440258	0.444833	0.432076	0.44179	0.433905	0.424851	0.410532
99	1.07833	1.13478	1.1904	1.23053	1.18308	1.24373	1.196	1.15794	1.21534	1.20279	1.19313	1.24298	1.25073	1.11617	1.04756	1.10157	1.07703	1.10978	1.21174	1.06903	1.01099	1.1455	0.891138	1.10971	1.1809	1.24384	1.10359	1.0848	1.15029	1.09916	1.11522	1.31646	1.29918	1.22198	0.997614	0.436054	0.60404	0.663507	0.604159	0.655777	0.537708	0.48014	0.407054	0.359367	0.518857	0.511435	0.50981	0.516773	0.516683
100	0.994811	1.00585	1.01663	1.04658	1.01503	1.05134	1.0817	1.08578	1.04631	1.04107	1.06941	1.09339	1.10805	1.1368	1.10566	1.11886	1.1173	1.14721	1.18084	1.20268	1.22294	1.23113	1.26866	1.33773	1.35566	1.38596	1.35661	1.36127	1.34509	1.33898	1.36401	1.35749	1.38609	1.34825	1.36907	1.38695	1.39971	1.32048	1.37147	1.34777	1.30391	1.30947	1.27753	1.34147	1.36699	1.45461	1.46275	1.51449	1.50707
101	0.455197	0.441987	0.424798	0.473119	0.492168	0.468199	0.471642	0.488217	0.513688	0.519167	0.519814	0.476007	0.48737	0.489983	0.491614	0.534748	0.548414	0.526967	0.549194	0.580433	0.596496	0.623933	0.617048	0.679748	0.734189	0.748263	0.792814	0.838867	0.866156	0.898951	0.933971	0.978585	1.01261	1.06641	1.05864	1.07846	1.10105	1.08786	1.14343	1.12279	1.4198	1.14665	1.04473	1.13996	1.26504	1.27405	1.43669	1.48983	1.49323
102	0.777165	0.8052	0.831811	0.856698	0.869095	0.942531	1.00914	1.09726	1.13431	1.15293	1.17625	1.13708	1.16528	1.1878	1.22137	1.21679	1.22939	1.22818	1.24008	1.20248	1.19594	1.18711	1.1712	1.13858	1.13664	1.09243	1.09212	1.10312	1.10261	1.11759	1.05402	1.07824	1.08722	1.09294	1.10249	1.08759	1.09012	1.13872	1.11419	1.12527	1.14479	1.22231	1.08656	1.17259	1.30618	1.26724	1.30463	1.28401	1.27051
103	0.495126	0.502971	0.531443	0.527743	0.555396	0.595861	0.614834	0.648434	0.66412	0.688251	0.719253	0.777519	0.74201	0.736946	0.800333	0.800961	0.814913	0.852725	0.839472	0.842284	0.893248	0.82419	0.863519	0.911634	0.94894	0.956306	0.911402	0.959655	0.970083	1.00431	1.04997	1.00025	1.04056	1.04387	1.01128	0.958346	0.965205	1.0715	1.15808	1.08945	1.02885	1.0549	1.08291	1.11545	1.01062	1.03658	1.07748	1.14576	1.04615
104	0.538302	0.569439	0.624877	0.682937	0.732225	0.755698	0.775071	0.781977	0.786424	0.704673	0.641498	0.607185	0.543581	0.539215	0.528581	0.517924	0.532383	0.533022	0.544759	0.638985	0.777353	0.842035	0.887048	0.922932	0.93718	0.967118	1.01177	1.01812	1.09177	1.20145	1.17229	1.23843	1.22182	1.26055	1.26023	1.26015	1.27883	1.28696	1.2496	1.23587	1.20967	1.23163	1.19679	1.16113	1.11512	1.12516	1.08471	1.07916	1.10582
105	0.685574	0.646629	0.59295	0.61035	0.582764	0.586424	0.561623	0.524577	0.505646	0.480522	0.462453	0.468287	0.466022	0.461548	0.442707	0.425781	0.452956	0.464518	0.470462	0.501889	0.589724	0.720842	0.803733	0.86746	0.909659	0.898615	0.90915	1.01642	1.02344	1.08089	1.14886	1.24349	1.22168	1.24085	1.30448	1.26998	1.29355	1.25344	1.26417	1.30332	1.22439	1.19411	1.07468	1.14507	1.13023	1.12495	1.0883	1.1401	1.15613
106	0.440907	0.462909	0.514538	0.513166	0.522225	0.554412	0.474084	0.605118	0.608851	0.689067	0.770526	0.794412	0.729359	0.788332	0.852359	0.88578	0.885123	0.85504	0.837901	1.11042	1.1335	1.20823	1.25195	0.898156	1.00758	1.04616	1.12845	1.10461	0.902885	1.25603	0.970485	0.923869	0.996207	0.92887	0.995993	1.09431	1.08416	1.09888	1.06385	0.908708	1.10359	1.15733	1.25801	1.11756	0.964538	1.09715	1.01635	1.01843	1.05352
107	1.11643	1.17563	1.18913	1.18833	1.24986	1.24285	1.27825	1.30472	1.26995	1.27994	1.26938	1.27375	1.3123	1.31742	1.27044	1.31479	1.24544	1.31451	1.34674	1.33034	1.33991	1.32756	1.3324	1.32618	1.3762	1.35389	1.08906	1.20227	1.19936	1.23693	1.10849	1.29022	1.42081	1.48215	1.30712	1.37765	1.48954	1.36594	1.22806	1.28663	1.39841	1.46069	1.48315	1.39075	1.48127	1.42905	1.22133	1.11728	0.997184
108	0.464711	0.441266	0.417208	0.451682	0.448781	0.403419	0.405907	0.427077	0.47037	0.450019	0.443122	0.403181	0.445168	0.409126	0.45531	0.451599	0.456537	0.416348	0.415706	0.406135	0.379272	0.355499			0.569195	0.566464	0.373915	0.350646	0.391306	0.374834	0.382182	0.392265	0.399116	0.408209	0.418288	0.442439	0.464609	0.42321	0.425614	0.445717	1.2366	1.16967	1.22393	1.22492	1.28168	1.20992	1.16106	1.20825	1.35096
109	1.3328	1.28613	1.15659	1.08412	1.15138	1.34205	1.3396	1.38872	1.35712	1.33787	1.32292	1.25843			1.27024	1.27734	1.23284	1.27082	1.25276	1.21961	1.23384	1.2611	1.19415	1.07873	1.12576	1.06117	1.10592	1.08216	1.03322	1.0208	1.05255	1.10807	1.1232	1.14144	1.1043	1.13017	1.1231	1.16242	1.16843	1.12945	1.09334	1.11563	1.14298	1.1939	1.16179	1.2221	1.20151	1.25067	1.31558
110	1.02583	1.06463	1.12881	1.11921	1.11717	1.11637	1.12039	1.09587	1.08814	1.13895	1.15303	1.05434	1.05216	1.01187	0.975309	1.02365	0.955952	0.993492	1.04848	1.09488	1.02712	1.12716	1.10472	1.07182	1.06868	0.985619	1.07369	1.10391	1.01472	1.08608	1.18169	1.14652	1.23962	1.21998	1.21504	1.29003	1.25293	1.32431	1.29564	1.27249	1.26877	1.17987	1.30071	1.27614	1.35188	1.23003	1.25505	1.24837	1.29178
111	0.902403	0.838894	0.894765	0.898599	0.890052	0.916929	0.902014	0.880486	1.01145	1.00308	1.00009	1.02003	1.11531	1.09084	1.0381	1.0868	1.1338	1.10341	1.1414	1.17352	1.20233	1.15465	1.17546	1.13432	1.18169	1.14097	1.06893	1.1322	1.20798	1.25268	1.22993	1.24584	1.21661	1.22368	1.15083	1.13741	1.03064	1.17573	1.25792	1.28201	1.20785	1.13721	1.12537	1.23393	1.22831	1.36832	1.31709	1.2394	1.20789
112	1.17263	1.17237	1.09545	0.981757	1.04234	1.05776	1.06405	0.775355	0.812129	1.23509	1.24904	1.22522	1.13899	1.2318	1.22426	1.23586	1.24775	1.17552	1.21643	1.16585	1.21934	1.16292	1.11297	1.13626	1.23935	1.28446	1.28656	1.29728	1.33485	1.31317	1.25685	1.3294	1.40854	1.31742	1.31144	1.28266	1.18184	1.18693	1.06364	1.10498	0.868259	0.964295	1.09769	1.19269	0.897556	0.853269	0.892443	0.994719
113	1.24473	1.26296	1.43137	1.41377	1.31375	1.34484	1.33337	1.25238	1.33952	1.31952	1.3182	1.32569	1.32951	1.37231	1.34233	1.36147	1.24909	1.41928	1.43315	1.46616	1.48171	1.44974	1.46566	1.44153	1.43869	1.37003	1.49044	1.56615	1.53227	1.44967	1.47444	1.49055	1.48848	1.49054	1.42871	1.39715	1.43927	1.40105	1.46319	1.52751	0.818054	0.941379	0.947441	0.955574	0.97255	0.945312	0.933051	0.918237	0.944526
114	0.504533	0.5516	0.576537	0.627241	0.648091	0.657715	0.652902	0.653928	0.651346	0.622051	0.590796	0.620574	0.552331	0.584605	0.53279	0.56651	0.591686	0.583037	0.59535	0.624404	0.664386	0.699918	0.74877	0.794707	0.824088	0.852486	0.88525	0.941774	1.05348	1.05903	1.04565	1.08988	1.08446	1.12657	1.02914	1.05698	0.942791	1.01152	1.09514	1.05295	1.0272	1.03227	1.11831	1.07618	1.05381	0.992081	1.03595	1.04844	0.971499
115	0.960685	0.960285	1.01059	1.04111	1.03475	1.07249	1.07112	1.09196	1.06844	1.06202	1.00586	1.06275	1.05349	1.01008	1.02545	1.07867	1.03952	1.08284	1.15102	1.14304	1.25135	1.21388	1.20337	1.15386	1.0705	1.05068	1.04321	1.10714	1.19223	1.20217	1.28371	1.17553	1.38856	1.38253	1.20078	1.22656	1.16846	1.26739	1.25704	1.21952	1.15805	1.19122	1.21775	1.26875	1.31207	1.31727	1.30148	1.26879	1.31222
116	1.14867	1.16774	1.13204	1.14485	1.11742	1.15662	1.21863	1.18688	1.19568	1.2151	1.20201	1.25775	1.2999	1.41447	1.4217	1.33124	1.32023	1.37835	1.48003	1.43902	1.29933	1.37262	1.35313	1.35826	1.33468	1.27126	1.27133	1.2648	1.20563	1.21813	1.28839	1.34183	1.33035	1.24737	1.30419	1.30897	1.33048	1.24547	1.16333	1.23516	1.15862	1.25412	1.25182	1.27283	1.23997	1.20085	1.33613	1.20724	1.24755
117	0.5975	0.635321	0.689629	0.718917	0.723992	0.754033	0.713522	0.713085	0.750205	0.852227	0.956862	1.06882	1.0732	1.08914	1.18147	1.21556	1.19275	1.18432	1.14343	1.15513	1.073	1.0174	1.12808	1.12896	1.0862	1.05957	1.08335	1.12695	1.12554	1.10219	1.12186	1.18198	1.18525	1.14565	1.09607	1.03042	1.17382	1.15114	1.18164	1.21024	1.06702	1.16855	1.31681	1.19139	1.13692	1.15695	1.22028	1.22437	1.18842
118	0.714011	0.801982	0.87848	0.984183	1.03323	1.06006	1.09954	1.17642	1.19972	0.988448	0.95895	0.998487	1.02122	1.04355	1.0426	1.05352	1.08022	1.07654	1.10702	1.03107	0.99132	0.929969	1.03871	1.08723	1.10039	1.2061	1.21298	1.18062	1.21592	1.28367	1.25336	1.2636	1.28092	1.25516	1.19968	1.13893	1.00054	1.19376	1.27308	1.35088	1.22366	1.2446	1.2753	1.23983	1.29738	1.35618	1.26249	1.25986	1.14001
119	0.647906	0.689068	0.724591	0.739904	0.767308	0.704147	0.764885	0.777524	0.850461	0.931912	0.95081	0.978143	1.02041	0.888476	0.962663	1.1335	1.1809	1.20982	1.23259	1.29033	1.08894	1.07832	0.978477	1.14089	1.17351	1.21224	1.22843	1.18698	1.12407	1.19081	1.26129	1.19798	1.1874	1.20557	1.17803	1.2721	1.26295	1.326	1.33817	1.3941	1.34515	1.38181	1.30915	1.32749	1.51928	1.44162	1.38897	1.35746	1.40362
120	0.777171	0.82811	0.822292	0.836697	0.889979	0.874208	0.959762	1.01609	1.07632	1.16759	1.14815	1.21079	1.28382	1.2682	1.19323	1.21655	1.22134	1.23189	1.08448	1.1	1.22048	1.18193	1.06583	1.17717	1.0333	1.06742	1.09196	1.0978	1.04515	1.10649	1.12807	1.11615	1.11942	1.1456	1.18526	1.18151	1.09835	1.20409	1.21856	1.1291	1.11761	1.14776	1.17821	1.10977	1.15159	1.11533	1.19348	1.05668	1.09852
121	1.07634	1.14167	1.12851	1.08809	1.19336	1.07307	1.26033	1.23321	1.19968	1.33518	1.28823	1.24481	1.38112	1.41568	1.47851	1.38958	1.35871	1.45215	1.45893	1.504	1.48229	1.48207	1.41093	1.36251	1.31772	1.24224	1.17876	1.07736	1.05725	1.00658	1.01061	1.04465	1.08169	1.18034	1.25428	1.32873	1.38662	1.46603	1.46626	1.44524	1.42696	1.4891	1.43208	1.45805	1.39324	1.36159	1.39228	1.41553	1.41648
122	0.381998	0.389808	0.406472	0.415736	0.422982	0.432477	0.42385	0.45141	0.434903	0.43507	0.434749	0.445924	0.472515	0.497948	0.538362	0.571417	0.640421	0.719621	0.780016	0.800233	0.885697	0.965211	1.02392	1.07147	1.13014	1.1512	1.19107	1.1274	1.07438	1.00098	1.05946	1.05778	1.17109	1.17464	1.16905	1.20023	1.21874	1.20624	1.19095	1.14117	1.10257	1.11841	1.17432	1.16414	1.22212	1.29957	1.34695	1.31881	1.28689
123	0.661382	0.685907	0.748398	0.832757	0.837218	0.865001	0.895104	0.883477	0.921683	0.99849	1.05471	1.10301	1.12831	1.16835	1.24193	1.2015	1.2868	1.36923	1.48023	1.44652	1.50822	1.42612	1.4291	1.3316	1.36544	1.48056	1.4926	1.35131	1.23108	1.29396	1.39135	1.50208	1.54623	1.60761	1.60883	1.62765	1.61103	1.51629	1.4705	1.52638	1.12056	1.1515	1.04366	1.15871	1.22902	1.14524	1.22697	1.17196	1.16241
124	1.25383	1.34495	1.36833	1.40237	1.36982	1.35739	1.38519	1.40443	1.41648	1.44565	1.50221	1.53989	1.52129	1.53197	1.58365	1.57677	1.51782	1.5546	1.46707	1.51533	1.54206	1.57805	1.62087	1.66171	1.44871	1.49395	1.46157	1.5156	1.63569	1.66636	1.68646	1.54109	1.50469	1.24704	1.30891	1.34899	1.40916	1.42244	0.802447	0.755235	0.656233	0.644934	0.825526	0.720897	0.588854	0.496731	0.468375	0.456888	0.437556
125	0.484731	0.526375	0.568231	0.486928	0.49015	0.493711	0.507541	0.515648	0.531847	0.498185	0.477587	0.457299	0.462389	0.462083	0.48665	0.489135	0.478534	0.516816	0.531675	0.58729	0.683997	0.698513	0.706914	0.714423	0.73597	0.745768	0.75903	0.75083	0.813526	0.887143	0.876691	1.00579	0.947966	0.955547	1.0385	0.894054	0.863899	1.06316	1.06133	1.07957	1.02637	1.04167	1.07633	1.00816	0.99639	0.968706	0.973279	0.981222	1.05632
126	0.514987	0.501039	0.484978	0.467135	0.479619	0.469952	0.461497	0.461979	0.459177	0.453153	0.470149	0.450278	0.428145	0.456548	0.486679	0.521679	0.559527	0.623026	0.685128	0.751367	0.780716	0.805838	0.828503	0.904802	0.953619	0.940887	0.979609	1.016	1.10137	1.20064	1.18881	1.2439	1.25285	1.21684	1.17707	1.17792	1.27443	1.27764	1.31019	1.3687	1.25105	1.26781	1.24913	1.26546	1.29242	1.30576	1.30574	1.32615	1.35021
127	0.922726	0.811584	0.799396	0.849812	0.87674	0.883101	0.913664	0.945379	0.909534	0.972112	0.858851	0.876236	0.866198	0.788444	0.748241	0.80141	0.811812	0.800026	0.838503	0.871653	0.886938	0.93981	0.891593	0.985824	1.01194	1.05492	0.939874	1.04023	1.0458	1.08839	1.07161	1.07349	1.08283	1.15745	1.27461	1.27929	1.29964	1.35389	1.28561	1.32678	1.25033	1.23484	1.20683	1.23082	1.26079	1.34664	1.31677	1.29193	1.30713
128	1.14954	1.17249	1.21774	1.19598	1.25137	1.34323	1.31974	1.38579	1.34916	1.36509	1.41669	1.3613	1.34883	1.31189	1.24684	1.3563	1.34911	1.41621	1.38952	1.31771	1.32371	1.25118	1.32996	1.36093	1.29975	1.39314	1.51361	1.62115	1.64405	1.61368	1.62319	1.58997	1.47249	1.43067	1.40501	1.36733	1.42441	1.49164	1.44835	1.46398	1.46124	1.49973	1.62614	1.25006	0.778281	0.724722	0.878919	0.810997	0.712103
129	1.22419	1.20777	1.21094	1.22667	1.17489	1.1843	1.28106	1.26299	1.25827	1.28418	1.28328	1.36236	1.35694	1.38945	1.29272	1.33725	1.32884	1.35649	1.30475	1.21442	1.14919	1.15969	1.12304	1.15608	1.1054	1.08892	1.19382	1.23076	1.27459	1.3441	1.331	1.3218	1.24699	1.24522	1.27935	1.42532	1.42207	1.32889	1.43252	1.44323	1.41953	1.31972	1.41306	1.45335	1.33324	1.25036	1.3456	1.40415	1.30153
130	0.894581	0.904894	0.923526	0.940394	1.00516	1.07573	1.14111	1.1567	1.18763	1.23349	1.20685	1.19011	1.19182	1.20778	1.31293	1.27859	1.29298	1.34203	1.31206	1.32162	1.3594	1.41513	1.3813	1.36308	1.34136	1.32525	1.29765	1.37137	1.40623	1.41623	1.41258	1.40527	1.44416	1.41126	1.33069	1.30535	1.2578	1.26476	1.23482	1.25229	1.60112	1.5958	1.64424	1.66789	1.6598	1.68894	1.65383	0.906871	0.755589
131	0.513362	0.579416	0.635712	0.677688	0.656509	0.658809	0.70065	0.730064	0.749028	0.783848	0.769991	0.757539	0.782822	0.795046	0.840854	0.8964	0.885849	0.90587	0.856424	0.890397	0.897214	1.10041	1.10085	1.18561	1.26843	1.24085	1.2597	1.26846	1.27184	1.24525	1.22116	1.11942	1.24864	1.18901	1.25582	1.27697	1.2506	1.15791	1.16631	1.19924	1.16811	1.17455	1.17234	1.16469	1.21025	1.21985	1.22686	1.22399	1.22682
132	0.551741	0.55962	0.563148	0.580561	0.562911	0.59161	0.605745	0.615274		0.615762	0.591584	0.595015	0.585547	0.619692	0.620426	0.699186	0.770975	0.813942	0.861117	0.892339	0.916848	0.920105	0.993421	0.999928	1.0488	1.13439	1.18034	1.27884	1.37181	1.35563	1.29269	1.26635	1.28118	1.22436	1.16142	1.12002	1.05886	1.16995	1.16973	1.1744	1.13895	1.21729	1.27947	1.38958	1.35821	1.3557	1.40954	1.38925	1.39453
133	1.10885	1.13752	1.18442	1.1859	1.18391	1.22129	1.24452	1.31847	1.30094	1.32974	1.34499	1.3814	1.39379	1.38364	1.38051	1.41137	1.40158	1.33587	1.38374	1.43205	1.38808	1.47261	1.41432	1.40884	1.46145	1.47549	1.47588	1.49987	1.51349	1.51052	1.49974	1.47249	1.44964	1.44433	1.41217	1.42271	1.29562	1.33265	1.47545	1.5403	1.39934	1.21941	1.3033	1.37345	1.39213	1.46529	1.34975	1.52285	1.6244
134	0.57682	0.560616	0.545147	0.538928	0.552106	0.547827	0.526736	0.536321	0.518154	0.502849	0.475352	0.456245	0.48466	0.487024	0.486758	0.481839	0.468169	0.493369	0.483668	0.483064	0.480645	0.482733	0.520437	0.528059	0.563397	0.618284	0.667188	0.71183	0.752094	0.743449	0.758088	0.748057	0.780897	0.847274	0.880488	1.01312	1.06593	1.07814	1.0514	1.02436	1.01117	0.993448	1.00827	1.03407	1.00384	0.895772	0.941683	0.956152	0.951167
135	1.06391	1.04363	1.04155	1.01682	1.00381	1.03335	1.05039	1.07948	1.06355	1.0888	1.10201	1.07519	1.13542	1.07034	0.971777	0.938695	1.05085	0.955661	0.98959	1.12316	1.13573	1.21306	1.19512	1.20816	1.14022	1.12122	1.0311	1.03631	1.16708	1.18168	1.17585	1.18534	1.09076	1.01258	1.11657	1.09799	1.0988	1.12904	1.25257	1.28769	1.21816	1.3515	1.40362	1.41254	1.41384	1.24921	1.31356	1.3382	1.34445
136	1.13281	1.22764	1.19009	1.19692	1.15066	1.11872	1.11707	1.12165	1.18019	1.24801	1.2304	1.28048	1.172	1.09098	1.14575	1.07591	1.077	1.11912	1.178	1.14188	1.13956	1.12016	1.1191	1.13661	1.10586	1.16361	1.18107	1.12881	1.17554	1.19779	1.09611	1.13109	1.15587	1.13796	1.07854	1.0945	1.13407	1.2522	1.35833	1.3388	1.37292	1.27113	1.26948	1.21142	1.16441	1.21949	1.17071	1.2004	1.30693
137	0.874049	0.965739	0.999885	1.05944	1.08922	1.14239	1.18224	1.21385	1.23968	1.22707	1.23663	1.25085	1.30168	1.26696	1.29871	1.2692	1.22577	1.25841	1.27803	1.24228	1.23109	1.24091	1.28779	1.32909	1.25385	1.25945	1.2272	1.26696	1.27619	1.22865	1.22432	1.24436	1.25763	1.27754	1.24547	1.27426	1.27466	1.22525	1.26098	1.30332	1.25306	1.22618	1.27931	1.38958	1.36912	1.35628	1.37033	1.39266	1.36739
138	1.29483	1.16849	1.21152	1.2202	1.26706	1.31591	1.38465	1.28222	1.2898	1.35845	1.33569	1.27509	1.32686	1.35473	1.37566	1.35419	0.855108	0.657891	0.649942	0.548559	0.811188	0.750472	0.717132	0.651942	0.539961	0.474186	0.459909	0.458203	0.471449	0.507481	0.488436	0.521002	0.509435	0.530596	0.532183	0.560437	0.58499	0.649378	0.69315	0.70178	1.3727	1.39233	1.41502	1.46748	1.44659	1.50176	1.43705	1.48703	1.45374
139	0.893335	0.934939	0.865286	0.9091	0.91391	0.929909	0.943621	0.974002	0.959419	0.99188	1.01206	1.02722	1.03907	1.01672	1.07391	1.07867	1.10703	1.0951	1.09364	1.09051	1.12256	1.16599	1.09085	1.15439	1.16033	1.22888	1.26559	1.24533	1.19761	1.25327	1.30173	1.31645	1.32919	1.32054	1.21371	1.16727	1.25117	1.28081	1.26971	1.38995	1.34316	1.35858	1.49406	1.50435	1.49006	1.50331	1.4358	1.42977	1.37958
140	0.383848	0.37	0.403476	0.389753	0.375258	0.367208	0.379778	0.364936	0.365669	0.357721	0.351786	0.343887	0.362987	0.38618	0.408573	0.390902	0.382534	0.406576	0.409951	0.40588	0.431162	0.437776	0.442569	0.412227	0.436048	0.471814	0.470139	0.459312	0.430068	0.433805	0.401808	0.355322	0.383753	0.388565	0.357651	0.320238	0.317104	0.313302	0.307762	0.300048	1.26854	1.29773	1.33154	1.36192	1.33745	1.41592	1.29855	1.25134	1.30068
141	1.28991	1.38189	1.40778	1.43582	1.42417	1.48243	1.45552	1.44499	1.44859	1.5105	1.52791	1.54545	1.51567	1.56122	1.58555	1.59557	1.60423	1.61708	1.69724	1.6661	1.63877	1.64116	1.61871	1.57647	1.53216	1.52944	1.46552	1.3551	1.29249	1.24973	1.29955	1.21259	1.22095	1.31795	1.43257	1.46801	1.46533	1.4107	1.36506	1.39059	1.25391	1.41681	1.44044	0.689445	0.701866	0.822836	0.672974	0.792548	0.69502
142	0.723208	0.746115	0.742512	0.777318	0.775488	0.813804	0.876677	0.917412	0.872948	0.939525	0.997963	0.998825	1.05944	1.08856	1.13283	1.05344	0.974295	1.01062	0.959585	1.02108	1.01189	0.945329	0.890041	0.870023	0.861109	0.891336	0.887833	0.836775	0.820664	0.801577	1.01391	1.05074	1.06651	1.00076	0.893693	0.848927	1.02438	1.0686	1.06204	1.08368	1.07261	1.14369	1.14543	1.17538	1.12882	1.18751	1.24197	1.24705	1.2142
143	0.4386	0.439325	0.45094	0.471857	0.47153	0.487507	0.50366	0.521994	0.589688	0.616333	0.633393	0.68952	0.731709	0.791352	0.830065	0.865427	0.874391	0.878213	0.89234	0.949006	0.936253	0.991776	1.02373	1.05741	1.12297	1.11393	1.16599	1.18485	1.12883	1.03022	1.00616	1.12397	0.965713	1.17384	1.09068	1.17725	1.09369	1.1531	1.08715	1.12482	1.0482	0.977608	1.09664	1.0292	1.07409	1.16294	1.16393	1.16668	1.16362
144	1.12499	1.13107	1.19061	1.22032	1.18012	1.12893	1.10425	1.13342	1.09083	1.06905	1.07999	1.1007	1.0867	1.07175	1.14494	1.11171	1.09666	1.10724	1.10485	1.148	1.17861	1.14817	1.17617	1.14347	1.18529	1.24647	1.15371	1.12184	1.21595	1.29658	1.32275	1.26357	1.19656	1.11461	1.14662	1.32562	1.27444	1.12807	1.42627	1.3374	1.25381	1.07498	1.17048	1.12648	1.17805	1.21342	1.12798	1.08236	1.2081
145	0.503397	0.5162	0.554155	0.606599	0.634636	0.651383	0.697782	0.741239	0.753899	0.76458	0.833377	0.881712	0.88162	0.947875	0.973883	0.978819	1.00036	1.07953	1.22221	1.24179	1.31195	1.27876	1.19789	1.3394	1.35442	1.34666	1.27778	1.22593	1.23721	1.36918	1.39063	1.37793	1.30125	1.26907	1.2637	1.26319	1.3015	1.31224	1.34609	1.43043	1.34497	1.29602	1.25176	1.36209	1.37579	1.35937	1.34637	1.29139	1.36914
146	0.944119	1.00113	1.03816	1.0757	1.09247	0.870889	0.932244	1.07649	1.11239	1.21875	1.17787	1.17549	1.1291	1.10983	1.0709	1.07868	1.13619	0.970673	0.964203	0.984828	0.945075	1.07567	1.11462	1.06347	1.09454	1.02997	1.13942	1.22364	1.28019	1.22072	1.16522	1.09461	1.25364	1.32062	1.33197	1.37366	1.25846	1.30977	1.25191	1.30008	1.14643	1.09825	1.12476	1.13395	1.05945	1.19228	1.30058	1.22942	1.264
147	0.931341	0.926786	0.939992	0.9763	1.01126	1.03662	1.05035	1.11937	1.17156	1.1669	1.19442	1.18399	1.15108	1.19524	1.12399	1.13798	1.1682	1.12155	1.13527	1.09177	1.1178	1.10441	1.13437	1.15677	1.18855	1.1976	1.30617	1.26088	1.27253	1.25861	1.28003	1.28876	1.25724	1.23042	1.26999	1.23632	1.20591	1.27123	1.25698	1.31784	1.21948	1.28061	1.15666	1.08641	1.10004	1.15356	1.24147	1.34882	1.34566
148	1.12835	1.14945	1.19103	1.19715	1.18042	1.18191	1.20039	1.18935	1.20375	1.18792	1.19903	1.20725	1.13116	1.16703	1.22813	1.24256	1.24682	1.2757	1.23929	1.20867	1.23279	1.24769	1.24166	1.24375	1.25669	1.24111	1.23505	1.24145	1.2299	1.22461	1.14682	1.15571	1.18176	1.1777	1.11277	1.21575	1.17507	1.19259	1.17436	1.17114	1.1437	1.18325	1.17884	1.09307	1.17426	1.18013	1.14038	1.15181	1.20541
149	1.15133	1.25841	1.21396	1.25603	1.22441	1.24271	1.26697	1.24141	1.2983	1.19285	1.15979	1.13067	1.19548	1.15289	1.1007	1.14439	1.1682	1.14849	1.20918	1.27955	1.19493	1.26958	1.17286	1.16278	1.11783	1.10635	1.19096	1.23379	1.2097	1.20709	1.22842	1.25274	1.31043	1.24035	1.30906	1.30883	1.32486	1.3198	1.33755	1.37575	1.25666	1.25408	1.27348	1.27342	1.27372	1.35931	1.35307	1.34488	1.34139
150	1.06615	1.12062	1.03635	1.05193	1.07378	1.15901	1.12327	1.15795	1.20034	1.13543	1.13464	1.12389	1.14349	1.10247	1.09447	1.07617	1.12771	1.14801	1.00934	1.16294	1.1362	1.13963	1.20373	1.1841	1.18342	1.18974	1.1454	1.12715	1.17699	1.15145	1.2635	1.21154	1.32302	1.30639	1.3569	1.44006	1.2829	1.24593	1.31329	1.37214	1.25308	1.37031	1.41761	1.35424	1.33927	1.31428	1.35589	1.34785	1.44997
151	1.15413	1.17838	1.2511	1.27534	1.26792	1.27312	1.29224	1.32659	1.35369	1.36654	1.38129	1.34298	1.33838	1.26282	1.24284	1.27837	1.30995	1.28371	1.24032	1.22331	1.26575	1.19513	1.20133	1.27591	1.22466	1.31911	1.33235	1.40017	1.43442	1.44056	1.45137	1.45867	1.50186	1.44344	1.43464	1.42806	1.57061	1.5598	1.65786	1.58065	1.3659	1.33555	1.38312	1.30675	1.26948	1.35809	1.43454	1.35739	1.35695
152	1.02277	1.05892	1.12508	1.14171	1.245	1.17594	1.16079	1.22296	1.26411	1.24077	1.11633	1.06657	1.20819	1.2685	1.15133	1.16925	1.06006	1.02244	1.16047	1.134	1.13424	1.1295	1.40315	1.28707	1.16081	1.07858	1.26576	1.23348	1.21668	1.27117	1.34766	1.50009	1.33126	1.52048	1.48352	1.45071	1.38009	1.40613	1.2965	1.38688	1.26477	1.25798	1.24314	1.41365	1.61108	0.74949	0.753828	0.74502	0.797241
153	1.14805	1.17894	1.20934	1.18863	1.18677	1.13472	1.1708	1.08514	1.14571	1.05162	1.20548	1.3052	1.22888	1.22058	1.22525	1.13965	1.19526	1.22189	1.21528	1.27701	1.23622	1.33124	1.23637	1.33999	1.30404	1.31765	1.40562	1.4088	1.33632	1.3199	1.31439	1.24487	1.58944	1.41281	1.26312	1.17713	1.29063	1.19362	1.28783	1.19198	1.20614	1.30675	1.38563	1.42986	1.24101	1.34087	1.31339	1.3993	1.39018
154	1.34817	1.33793	1.28265	1.33492	1.34006	1.34076	1.49632	1.49673	1.59093	1.52058	1.51206	1.54019	1.49648	1.56617	1.64046	1.69335	1.68944	1.63934	1.61676	1.67462	1.68158	1.80297	1.8065	1.77159	1.79289	1.87367	1.92908	1.83739	1.88695	1.90044	1.877	1.91088	1.94705	1.82281	1.8863	1.79219	1.83992	0.835617	0.85788	0.934266	0.838075	0.804569	0.844042	0.79388	0.730631	0.71053	0.678771	0.641701	0.628379
155	0.57682	0.560616	0.545147	0.538928	0.552106	0.547827	0.526736	0.536321	0.518154	0.502849	0.475352	0.456245	0.48466	0.487024	0.486758	0.481839	0.468169	0.493369	0.483668	0.483064	0.480645	0.482733	0.520437	0.528059	0.563397	0.618284	0.667188	0.71183	0.752094	0.743449	0.758088	0.748057	0.780897	0.847274	0.880488	1.01312	1.06593	1.07814	1.0514	1.02436	1.01117	0.993448	1.00827	1.03407	1.00384	0.895772	0.941683	0.956152	0.951167
156	0.652909	0.703798	0.717471	0.775854	0.801686	0.843414	0.819434	0.898398	0.927288	0.965983	0.953184	1.0397	1.02954	1.08942	1.07095	1.05182	1.11795	1.1747	1.16234	1.16923	1.18043	1.17638	1.20822	1.30693	1.27055	1.25329	1.26425	1.28796	1.34243	1.42726	1.31866	1.32739	1.37318	1.3357	1.32552	1.3656	1.41965	1.38731	1.31196	1.37156	1.3157	1.2712	1.31739	1.29178	1.31252	1.34618	1.36479	1.36373	1.36403
157	0.365168	0.382852	0.393991	0.384845	0.349845	0.377467	0.381258	0.373218	0.383103	0.387472	0.386312	0.432759	0.439187	0.48423	0.527342	0.561198	0.590055	0.601523	0.608467	0.638907	0.649917	0.629386	0.556393	0.572374	0.534197	0.480137	0.493637	0.467419	0.459473	0.441693	0.42514	0.444574	0.431768	0.505811	0.676197	0.72514	0.741354	0.75745	0.770606	0.79173	1.1434	1.04279	1.16157	1.21487	1.223	1.26421	1.30406	1.40674	1.48637
158	1.00824	1.01406	1.0585	1.05438	1.14864	1.15962	1.1588	1.20942	1.16824	1.21603	1.215	1.29103	1.3226	1.32366	1.3627	1.37019	1.39158	1.38824	1.39859	1.37836	1.44337	1.46092	1.43239	1.40138	1.42805	1.39375	1.41082	1.44718	1.3937	1.42247	1.43975	1.35559	1.39726	1.40415	1.40444	1.42696	1.41726	1.44226	1.47757	1.58653	0.712214	0.735046	0.786356	0.764619	0.639358	0.630083	0.575625	0.512012	0.550567
159	1.10586	1.13791	1.07617	1.08963	1.0679	1.04889	0.945036	1.02416	1.04071	1.15605	1.00968	1.038	1.08423	1.06207	1.14557	1.34379	1.27939	1.23096	1.22034	1.19084	1.23196	1.24297	1.26052	1.25326	1.44125	1.49134	1.47227	1.37393	1.33071	1.27925	1.45984	1.4948	1.51931	1.41445	1.37575	1.35303	1.42367	1.43765	1.22189	1.28626	1.25668	1.39814	1.43186	1.50544	1.53452	1.51068	1.46354	1.49683	1.41557
160	1.11659	1.15318	1.18269	1.13578	1.09435	1.14532	1.1474	1.2703	1.26818	1.24107	1.20207	1.27065	1.29482	1.29445	1.37172	1.35484	1.3441	1.27083	1.26817	1.30965	1.29455	1.28936	1.22965	1.20286	1.2851	1.38207	1.26892	1.4108	1.32144	1.18682	1.18366	1.16688	1.06243	1.24827	1.28976	1.28537	1.21914	1.29216	1.13076	1.26478	1.22729	1.26443	1.25313	1.34072	1.35909	1.21549	1.38009	1.34414	1.38493
161	1.2639	1.30256	1.26697	1.26935	1.25138	1.27735	1.25107	1.32017	1.30257	1.29168	1.28726	1.27155	1.3462	1.32926	1.38339	1.40332	1.38182	1.28044	1.38398	1.34279	1.32986	1.35477	1.38239	1.34344	1.33133	1.38027	1.32557	1.29021	1.33878	1.27677	1.23316	1.23735	1.3009	1.33006	1.24514	1.33078	1.28733	1.24784	0.492304	0.444662	0.393758	0.55111	0.620205	0.519322	0.518625	0.552989	0.552936	0.539047	0.502646
162	0.604434	0.67001	0.72105	0.776935	0.805362	0.807208	0.819836	0.848306	0.888841	0.917969	0.943409	0.951172	1.01533	1.08181	1.12806	1.14914	1.23233	1.25914	1.30494	1.25027	1.19924	1.234	1.23989	1.20217	1.19207	1.11559	1.07976	1.00459	1.05051	1.0522	1.06566	1.09657	1.0838	1.06538	1.10884	1.12746	1.21317	1.21175	1.22326	1.20461	1.15383	1.17863	1.15305	1.18055	1.1851	1.17096	1.1338	1.13257	1.19381
163	0.478469	0.511361	0.500874	0.500566	0.510472	0.524403	0.554162	0.542776	0.512889	0.506852	0.540497	0.530614	0.538602	0.561554	0.585467	0.625424	0.664723	0.772909	0.839714	0.896241	0.909297	0.950422	0.959504	1.0046	1.02735	1.09289	1.12266	1.1962	1.26905	1.18884	1.19543	1.16913	1.27759	1.35762	1.40347	1.38952	1.45425	1.42784	1.35214	1.30961	1.22411	1.16683	1.20475	1.22207	1.16199	1.17248	1.15855	1.1363	1.09234
164	0.932753	1.02345	1.09256	1.04648	1.00624	1.0869	1.08005	1.14043	1.19007	1.09173	1.04741	1.06941	1.14108	1.11506	1.11973	1.09092	1.1665	1.20693	1.18966	1.27109	1.16053	1.05476	1.07807	1.13321	1.13717	1.0996	1.1469	1.31123	1.18571	1.11524	1.01511	0.907963	0.810056	0.976799	0.947888	1.04845	1.13746	1.17324	1.08175	1.15994	1.14653	0.903043	0.979296	1.11289	1.09629	1.1897	1.21575	1.21287	1.33219
165	0.707329	0.776441	0.780804	0.803651	0.8816	0.869379	0.916284	0.947534	0.993948	0.996975	1.01686	1.037	1.06487	1.08664	1.06307	1.0939	1.01713	1.07065	1.05492	1.12215	1.08617	1.10758	1.10805	1.10135	1.16881	1.05803	1.11644	1.25058	1.11351	1.18204	1.2613	1.26681	1.26491	1.31351	1.27287	1.31118	1.33978	1.33814	1.39814	1.35955	1.32543	1.25751	1.2338	1.27758	1.32147	1.43923	1.36001	1.38314	1.46957
166	1.09142	1.19655	1.13626	0.92289	0.917308	1.05792	1.05935	0.990109	1.09079	1.09755	0.840679	1.02063	1.23478	1.21364	1.21441	1.04302	1.06796	1.10266	1.08247	1.0037	1.05469	0.93571	1.14922	1.17645	1.12766	1.01112	1.30074	1.30816	1.38043	1.48178	1.30811	1.31403	1.35208	1.52238	1.4855	1.44923	1.58906	1.59775	1.48078	1.42699	1.37284	1.34486	1.2939	1.42683	1.51496	1.42202	1.47585	1.36926	1.32579
167	0.523735	0.541542	0.472501	0.491205	0.508864	0.503596	0.505638	0.51657	0.556727	0.57664	0.599446	0.596082	0.617725	0.625596	0.664699	0.712455	0.72924	0.767393	0.762041	0.808764	0.83343	0.894256	0.885812	0.952721	0.998604	0.98687	1.06769	1.09793	1.16964	1.24959	1.18815	1.33212	1.30785	1.274	1.26973	1.2222	1.18775	1.18163	1.25243	1.30491	1.2421	1.22447	1.20325	1.14739	1.16121	1.14795	1.142	1.20767	1.19361
168	1.25972	1.36615	1.40013	1.26908	1.30956	1.296	1.31925	1.35772	1.30234	1.3293	1.28088	1.38283	1.35664	1.25968	1.29867	1.31943	1.3087	1.4006	1.39135	1.29689	1.41267	1.41243	1.25969	1.37691	1.52303	1.43034	1.36452	1.18171	1.28697	1.35496	1.36435	1.17702	1.24783	1.30172	1.38436	1.54397	1.57825	1.44621	1.15692	0.698867	0.703413	0.745827	0.804503	0.750094	0.629621	0.608914	0.48892	0.4919	0.470106
169	0.707717	0.716896	0.755092	0.670511	0.666136	0.847658	0.834357	0.82324	0.816222	0.814257	0.828083	0.81129	1.02766	1.0001	0.829575	0.901143	0.945943	1.00232	1.15804	1.14202	1.15964	1.23753	1.27202	1.33216	1.36019	1.4447	1.436	1.55098	1.51347	1.34725	1.15723	1.15359	1.20862	1.27268	1.31404	1.22583	1.26642	1.23775	1.28175	1.31107	1.29125	1.32252	1.3008	1.26143	1.19469	1.14903	1.11793	1.1231	1.22394
170	1.31622	1.31233	1.32032	1.30593	1.34413	1.35626	1.33427	1.33762	1.32785	1.44142	1.47706	1.38328	1.37228	1.39813	1.426	1.48278	1.65205	1.52513	1.55945	1.43474	1.29681	1.34127	1.33458	1.35613	1.42511	1.43687	1.48789	1.46522	1.42697	1.45417	1.38405	1.44373	1.5542	0.790473	0.774772	0.729807	0.77375	0.714501	0.783683	0.726294	0.685512	0.650186	0.659878	0.679066	0.676816	0.682896	0.663586	0.678627	0.676622
171	1.42806	1.56262	1.60246	1.67466	1.64599	1.40051	1.55794	1.68591	1.33548	1.04988	0.680363	0.647389	0.737789	0.877038	0.758041	0.684294	0.645197	0.621817	0.642482	0.621113	0.679425	0.702481	0.778033	0.789532	0.868141	0.916394	0.918069	0.952044	1.00013	1.04843	1.01274	1.05807	1.07059	1.06723	1.16191	1.2019	1.19744	1.0894	1.11235	1.10977	1.0992	1.13074	1.16721	1.19992	1.19157	1.1173	1.10111	1.10796	1.18409
172	0.493239	0.505426	0.493435	0.49395	0.494562	0.502875	0.505225	0.496637	0.522041	0.548838	0.577097	0.632493	0.650044	0.66677	0.700389	0.75398	0.783178	0.79247	0.816779	0.864278	0.847094	0.827545	0.81008	0.846098	0.856805	0.887277	0.927425	0.898617	0.911563	0.944576	1.12284	1.11744	1.19275	1.18686	1.19438	1.22356	1.12455	1.15241	0.994805	0.960342	1.04022	0.913484	1.01193	0.996499	0.990262	1.08335	1.11623	0.920509	0.862514
173	1.04544	1.12701	1.09182	1.11351	1.13701	1.05197	1.04791	1.04347	1.11208	1.05797	1.10115	1.05617	0.974233	0.986237	1.0648	1.08229	1.02184	1.01838	1.05649	1.06209	1.03564	1.14165	0.984751	1.03536	1.10495	1.08411	1.06315	1.09808	1.06991	1.17663	1.12251	1.11941	1.04923	0.953032	0.999882	0.9212	1.10654	1.00658	0.965867	0.902681	1.14242	1.15617	1.23994	1.08787	1.3366	1.21222	1.17536	1.23002	1.14395
174	0.601422	0.679542	0.731714	0.775205	0.845879	0.880315	0.874896	0.843423	0.834852	0.851961	0.897938	0.921985	0.940346	0.958978	0.993804	1.02718	1.07149	1.14078	1.23799	1.3109	1.34565	1.36607	1.35646	1.35434	1.30742	1.30323	1.29301	1.31911	1.36418	1.28523	1.38044	1.36411	1.42575	1.48794	1.46704	1.44777	1.37733	1.36976	1.42217	1.44359	1.33279	1.23318	1.12275	1.06778	1.01847	1.11898	1.12159	1.13211	1.13595
175	1.05479	1.05965	1.08084	1.15722	1.17772	1.13168	1.09921	1.19946	1.18324	1.23329	1.21377	1.21339	1.13397	1.12996	1.19143	1.26032	1.28447	1.22996	1.2025	1.16571	1.08219	1.14535	1.14063	1.27315	1.22431	1.1869	1.14275	1.28962	1.32344	1.34213	1.28247	1.24109	1.24851	1.19939	1.35095	1.48372	1.45914	1.5328	1.53254	1.52123	1.47471	1.49244	1.50662	1.44815	1.4868	1.48815	1.45432	1.39236	1.46661
176	0.433297	0.453582	0.480247	0.439446	0.45346	0.460627	0.498847	0.544111	0.553302	0.579096	0.634906	0.633822	0.650993	0.699053	0.73445	0.776992	0.77658	0.799147	0.789682	0.848546	0.823485	0.852899	0.897733	1.01559	1.10133	1.1624	1.08089	1.14594	1.05039	1.06985	1.0851	1.03906	0.928042	1.00019	1.02158	1.08859	1.08878	1.05528	1.12535	1.04832	0.930225	1.11078	1.13703	1.19662	1.21602	1.34434	1.37761	1.31862	1.2422
177	1.17251	1.16957	1.11408	1.05137	1.07984	1.14735	1.18739	1.16748	1.17243	1.22441	1.2851	1.32193	1.24563	1.3227	1.22245	1.26066	1.2525	1.23849	1.23084	1.26989	1.27737	1.30842	1.34221	1.30442	1.29368	1.34876	1.36934	1.39046	1.37373	1.4091	1.42195	1.28883	1.39299	1.25619	1.36963	1.39798	1.37236	1.45771	1.47932	1.48815	1.49028	1.52937	1.57537	0.700574	0.775521	0.845776	0.908578	0.849183	0.789093
178	0.89122	1.01	1.08476	1.14537	1.23851	1.19736	1.16928	1.25834	1.25328	1.222	1.13296	1.19211	1.25869	1.34265	1.30697	1.29525	1.19665	1.2115	1.28112	1.33791	1.35779	1.38619	1.39838	1.34414	1.36638	1.35536	1.40115	1.43858	1.29935	1.3168	1.30102	1.26638	1.20687	1.2899	1.27927	1.32268	1.34339	1.41762	1.44383	1.37869	1.32501	1.42695	0.921741	0.648819	0.634424	0.415344	0.752785	0.682661	0.635622
179	0.57901	0.592457	0.579535	0.582226	0.598542	0.608319	0.64897	0.6797	0.700223	0.753544	0.731546	0.727126	0.70104	0.743373	0.72518	0.778657	0.801857	0.829992	0.861607	0.855201	0.925447	0.900284	0.95113	0.99895	1.0024	1.08401	1.07987	1.2521	1.36271	1.37097	1.38248	1.3157	1.39568	1.39541	1.43364	1.45674	1.5298	1.55619	1.52181	1.50883	1.38727	1.4204	1.44645	1.45002	1.38572	1.40921	1.31325	1.30607	1.31294
180	1.08597	1.10111	1.09641	1.14743	1.17364	1.19974	1.19155	1.2562	1.28901	1.19995	1.2004	1.31102	1.34912	1.32392	1.277	1.28361	1.31332	1.20797	1.20916	1.24716	1.25655	1.25076	1.31725	1.23898	1.24475	1.25708	1.24201	1.22907	1.17823	1.15078	1.20374	1.14897	1.18908	1.20074	1.25275	1.36083	1.30837	1.36863	1.3664	1.46674	1.27272	1.24586	1.32015	1.3405	1.37011	1.34162	1.37042	1.34582	1.40529
181	0.739642	0.850467	0.897725	0.928853	0.961901	0.913759	0.954581	1.01515	1.12622	1.23112	1.29187	1.31888	1.28205	1.42053	1.50509	1.62133	1.60661	1.456	1.4767	1.57622	1.63655	1.60925	1.69666	1.61296	1.5918	1.54833	1.32676	1.33707	1.33064	1.26633	1.2489	1.0969	1.14864	1.19872	1.23545	1.23328	1.21227	1.33863	1.32562	1.28234	1.39365	1.3883	1.1758	1.12105	1.18958	1.1979	1.26524	1.29619	1.33918
182	1.10885	1.13752	1.18442	1.1859	1.18391	1.22129	1.24452	1.31847	1.30094	1.32974	1.34499	1.3814	1.39379	1.38364	1.38051	1.41137	1.40158	1.33587	1.38374	1.43205	1.38808	1.47261	1.41432	1.40884	1.46145	1.47549	1.47588	1.49987	1.51349	1.51052	1.49974	1.47249	1.44964	1.44433	1.41217	1.42271	1.29562	1.33265	1.47545	1.5403	1.39934	1.21941	1.3033	1.37345	1.39213	1.46529	1.34975	1.52285	1.6244
183	0.692445	0.705279	0.745253	0.807912	0.841175	0.860725	0.895727	0.895059	0.940446	0.942557	0.986639	0.970543	0.931281	0.967819	0.948238	0.979214	1.00578	1.04608	1.05502	1.0251	1.02659	1.08608	1.0455	1.05116	1.09548	1.13352	1.13486	1.20772	1.25675	1.21542	1.10792	1.12607	1.19648	1.23464	1.2455	1.2442	1.29219	1.21391	1.25365	1.20657	1.17062	1.09827	1.17745	1.28044	1.36541	1.39412	1.44344	1.40104	1.405
184	1.03642	0.932528	0.919953	0.948021	0.934448	0.90167	0.88412	0.942276	0.921143	0.958437	0.955474	0.960581	0.94744	0.975968	1.0088	1.04897	1.02506	1.14978	1.10103	1.12964	1.15397	1.21973	1.20945	1.29785	1.29313	1.32802	1.36984	1.28915	1.3392	1.36199	1.28537	1.4223	1.40315	1.41535	1.41883	1.37587	1.28019	1.30074	1.28527	1.21102	1.12523	1.15824	1.16217	1.20794	1.22533	1.23565	1.25968	1.25605	1.23316
185	1.4737	1.51644	1.40777	1.43108	1.41672	1.32461	1.22795	1.29641	1.26852	1.30058	1.26106	1.28888	1.26332	1.29486	1.26103	1.28377	1.40263	1.46363	1.4091	1.442	1.47568	1.52305	1.59672	1.62616	1.61488	1.5815	1.49286	1.54867	1.51969	1.46437	1.46398	1.46247	1.38516	1.35203	1.40783	1.4792	1.52075	1.52862	0.773932	0.728443	1.37951	1.45977	1.55875	1.53569	1.52385	1.38435	1.33984	1.32496	1.36394
186	0.892155	1.04211	1.09603	1.07775	1.04733	1.09715	1.05661	1.12585	1.19239	1.16128	1.1179	1.17677	1.14892	1.09385	1.18265	1.16685	1.11847	1.24625	1.30567	1.36916	1.31907	1.25814	1.27339	1.30276	1.31507	1.3499	1.36564	1.33975	1.28157	1.24564	1.37862	1.37736	1.4217	1.41373	1.34378	1.33821	1.27732	1.32817	1.32777	1.19177	1.24779	1.25738	1.2377	1.30346	1.33989	1.37761	1.33435	0.823816	0.573865
187	0.595503	0.591631	0.599942	0.601268	0.603403	0.608352	0.603303	0.627484	0.62692	0.627923	0.658136	0.634275	0.639444	0.648116	0.642871	0.642559	0.631574	0.640711	0.631846	0.635482	0.679452	0.675737	0.666775	0.659771	0.699276	0.750788	0.653953	0.696712	0.61922	0.638953	0.534207	0.487896	0.457581	0.46407	0.437574	0.455674	0.462334	0.497612	0.527381	0.546712	1.25123	1.27097	1.27583	1.31911	1.2977	1.28804	1.29692	1.36835	1.35283
188	1.19609	1.1488	0.902298	0.943386	1.09776	1.22133	1.47031	1.42973	1.4645	1.48654	1.4339	1.39928	1.35217	1.42767	1.34773	1.35942	1.40254	1.34967	1.36266	1.3546	1.29308	1.50748	1.3718	1.49476	1.37022	1.47746	1.49143	1.28733	0.578935	0.582436	0.659586	0.70606	1.183	1.27847	1.36365	1.33345	1.32196	1.29231	1.30143	1.30549	1.35586	1.22353	1.20951	1.28792	1.40243	1.34924	1.16097	1.14421	1.21654
189	0.9577	0.943654	0.989468	1.00513	1.00771	1.03964	1.02508	1.05518	0.969202	1.02035	0.98261	1.04128	1.0669	1.06365	1.00909	1.01764	1.09209	1.10071	1.15506	1.15421	1.13358	1.1359	1.11187	0.920574	1.1873	1.18668	1.15432	1.24046	1.27779	1.26938	1.21837	1.31805	1.31249	1.37924	1.39407	1.44006	1.42932	1.38812	1.40368	1.44017	1.47944	1.49825	1.42495	1.45095	1.39183	1.41632	1.44029	1.45514	1.3892
190	1.12104	1.231	1.22439	1.29175	1.32862	1.33074	1.33456	1.37304	1.30586	1.40379	1.46142	1.48759	1.43736	1.40417	1.50233	1.5547	1.30762	1.34326	1.45204	1.51035	1.48073	1.5856	1.52494	1.34845	1.43657	1.54919	1.52902	1.5281	1.61221	1.5927	1.57721	1.53811	1.5464	1.63812	1.53548	1.45797	1.52141	1.51834	1.55736	1.47721	1.52438	0.717124	0.49175	0.574111	0.763031	0.820884	0.662063	0.594783	0.553434
191	1.26645	1.22371	1.30508	1.28345	1.31481	1.31158	1.2604	1.24719	1.32281	1.2573	1.23445	1.23295	1.25847	1.30184	1.27667	1.27791	1.27527	1.15637	1.26954	1.29923	1.29944	1.30534	1.36206	1.34948	1.33539	1.3135	1.28286	1.27574	1.35475	1.29988	1.37098	1.46098	1.33487	1.23848	1.22071	1.19808	1.24242	1.23765	1.255	1.27897	1.34196	1.34032	1.26804	1.31004	1.42836	1.38497	1.25692	1.29025	1.35415
192	1.20476	1.19341	1.23907	1.25355	1.23786	1.23811	1.18724	1.21757	1.17294	1.22605	1.27556	1.30072	1.27726	1.32457	1.33938	1.18316	1.25763	1.31899	1.27871	1.36094	1.39645	1.37495	1.39114	1.38777	1.39459	1.40906	1.36825	1.38006	1.4169	1.44481	1.49329	1.37348	1.46866	1.45144	1.46163	1.43905	1.44899	1.44831	1.38849	1.50613	1.37948	1.49868	1.41361	1.42237	1.42489	1.36512	1.39255	1.53694	1.47067
193	0.399949	0.398948	0.401535	0.392432	0.39805	0.384316	0.391882	0.381137	0.399452	0.417523	0.419653	0.443791	0.472946	0.481012	0.510068	0.510885	0.519022	0.522487	0.512333	0.508817	0.513086	0.487272	0.477301	0.481386	0.482235	0.4711	0.460503	0.444247	0.4393	0.447736	0.418923	0.431977	0.446484	0.446484	0.432496	0.448346	0.430954	0.431852	0.431671	0.439975	0.891074	0.987651	0.984711	0.926527	0.930191	0.948015	0.961059	1.02939	1.10673
194	1.08669	1.23056	1.19602	1.32703	1.16706	1.15494	1.32765	1.20456	1.10669	1.08501	1.18466	1.25648	1.29525	1.2819	1.31652	1.42445	1.21286	1.22268	0.981792	1.23344	1.25065	1.2627	1.33452	1.12883	1.17218	1.27427	1.14554	1.21686	1.10682	0.661426	0.508437	0.488936	0.75426	0.790435	0.696792	0.604988	0.54841	0.595188	0.543801	0.560902	0.519245	0.544961	0.588812	0.624716	0.652462	0.667316	0.695309	0.73947	0.771767
195	0.858395	0.942646	0.96014	0.929796	1.02283	1.06836	1.08494	1.05513	1.11478	1.1122	1.11824	1.18121	1.18733	1.17911	1.20437	1.09384	1.11668	1.09093	1.15852	1.26689	1.17213	1.32826	1.32658	1.39439	1.38866	1.29097	1.11297	1.27034	1.37352	1.36561	1.2538	1.16298	1.22389	1.32215	1.28176	1.26028	1.39615	1.27673	1.38262	1.19328	1.25135	1.17256	1.31418	1.3093	1.26892	1.29738	1.17212	1.33374	1.30773
196	1.16306	1.24887	1.23512	1.18752	1.21408	1.36863	1.31392	1.28878	1.3527	1.3882	1.41156	1.45618	1.52393	1.51019	1.53275	1.57633	1.63224	1.61506	1.61914	1.56967	1.53939	1.59734	1.57394	1.53548	1.55119	1.56504	1.59342	1.57086	1.48715	1.521	1.48933	1.47706	1.49643	1.53588	1.50341	1.49028	1.51413	1.42155	1.47415	1.42324	1.37765	1.34686	1.34584	1.37709	1.44904	1.42464	1.42312	1.46211	1.42319
197	0.907677	0.855758	0.88499	0.909468	0.939785	0.981492	1.02117	1.07178	1.11009	1.19173	1.23325	1.34768	1.33709	1.41309	1.32815	1.39874	1.39252	1.47758	1.33881	1.25742	1.21326	1.15879	1.07523	1.10066	1.05583	1.10157	1.1501	1.14522	1.13533	1.1691	1.10414	1.18138	1.21399	1.30323	1.29355	1.2792	1.26156	1.34573	1.33228	1.3813	1.34372	1.33457	1.3074	1.36401	1.30646	1.40627	1.30313	1.34509	1.42821
198	0.419758	0.408502	0.441054	0.409305	0.416051	0.402426	0.375743	0.374402	0.387679	0.40541	0.409499	0.406883	0.390106	0.397426	0.394593	0.38785	0.397506	0.399808	0.384799	0.388521	0.408242	0.402411	0.41168	0.428769	0.424237	0.416932	0.407219	0.414428	0.417921	0.40905	0.407818	0.438022	0.424521	0.423752	0.416297	0.422922	0.416993	0.419754	0.391098	0.396504	1.2456	1.29303	1.29413	1.30855	1.31376	1.29208	1.31201	1.36755	1.31853
199	0.635895	0.709673	0.759167	0.778807	0.804903	0.81575	0.877449	1.0005	1.11146	1.19258	1.26526	1.35396	1.41244	1.43911	1.47007	1.58455	1.4677	1.43396	1.42304	1.48989	1.48746	1.49088	1.44891	1.4162	1.37463	1.36397	1.3033	1.28583	1.30995	1.43201	1.3782	1.32997	1.22259	1.12081	1.18244	1.21945	1.21587	1.13493	1.20787	1.16437	1.10538	1.05199	1.12639	1.12245	1.279	1.29814	1.23792	1.41344	1.30628
200	1.05724	0.902074	1.10831	0.976509	1.06037	0.896689	1.13762	0.951084	0.899127	0.897573	0.841501	0.92354	0.874902	0.941047	0.93124	0.991501	1.10464	0.863201	0.994798	0.950512	0.948933	1.06682	0.985118	1.03644	1.15834	1.15618	1.14322	1.21235	1.18545	1.20756	1.16433	1.05598	1.00523	1.03108	1.06869	1.07776	1.19502	1.11858	1.10853	1.07891	1.20616	1.13338	1.6418	1.56743	1.59639	1.57439	1.51813	1.7235	1.70529
201	1.04234	1.06988	1.07893	1.10344	1.17805	1.17196	1.13213	1.1201	1.09657	1.09873	1.05063	0.974359	0.979926	1.01728	0.984221	0.99305	0.923208	0.865949	0.915949	0.988755	1.05388	1.13126	1.17058	1.21816	1.21421	1.25692	1.30271	1.285	1.20513	1.26364	1.2355	1.24168	1.24668	1.24077	1.2239	1.26421	1.25502	1.48638	1.35283	1.33859	1.34675	1.34204	1.32774	1.33695	1.33642	1.34246	1.29913	1.27495	1.20919
202	0.574857	0.576743	0.594438	0.583949	0.588379	0.606698	0.622203	0.700421	0.73465	0.786322	0.831154	0.915402	0.93999	0.928586	0.968928	1.01281	1.09683	1.09367	1.16786	1.19664	1.16079	1.25111	1.24096	1.20369	1.29906	1.26371	1.2754	1.182	1.25926	1.2004	1.29171	1.32285	1.35932	1.44507	1.4049	1.4928	1.33443	1.30804	1.17576	1.17854	1.29825	1.16214	1.31773	1.29919	1.27264	0.987515	0.54087	0.499332	0.65358
203	0.639768	0.61961	0.619363	0.613048	0.588814	0.624521	0.634548	0.638983	0.63038	0.618814	0.622878	0.601366	0.545052	0.499482	0.477759	0.440973	0.43661	0.41327	0.388517	0.36663	0.360685	0.376353	0.35641	0.329329	0.336141	0.330008	0.342376	0.345889	0.329343	0.329519	0.316695	0.310543	0.314778	0.320944	0.32983	0.321285	0.329447	0.338242	0.346339	0.362002	1.31266	1.40246	1.43084	1.45731	1.51375	1.50731	1.39338	1.51812	1.42925
204	1.13914	1.09616	1.11736	1.04543	1.07815	0.99495	1.02427	1.00236	0.949189	0.9784	0.976899	1.02288	1.02329	0.97825	0.946607	1.04089	1.06599	1.10144	1.10098	0.998352	1.17457	1.16698	1.13181	1.10102	1.14414	1.17569	1.1716	1.12079	1.21723	1.28354	1.34683	1.32518	1.37239	1.3846	1.30563	1.15654	1.18463	1.14556	1.29696	1.20946	1.30864	1.33403	0.622875	0.720934	0.667468	0.677454	0.702632	0.631947	0.523113
205	0.639768	0.61961	0.619363	0.613048	0.588814	0.624521	0.634548	0.638983	0.63038	0.618814	0.622878	0.601366	0.545052	0.499482	0.477759	0.440973	0.43661	0.41327	0.388517	0.36663	0.360685	0.376353	0.35641	0.329329	0.336141	0.330008	0.342376	0.345889	0.329343	0.329519	0.316695	0.310543	0.314778	0.320944	0.32983	0.321285	0.329447	0.338242	0.346339	0.362002	1.31266	1.40246	1.43084	1.45731	1.51375	1.50731	1.39338	1.51812	1.42925
206	0.38589	0.397383	0.410678	0.39805	0.371177	0.404405	0.425587	0.406342	0.410503	0.412777	0.409892	0.41378	0.436136	0.439623	0.43532	0.441298	0.456197	0.463495	0.451028	0.463835	0.46101	0.471877	0.482817	0.507964	0.484489	0.469497	0.483647	0.48335	0.506632	0.534411	0.48957	0.499378	0.502092	0.49702	0.504948	0.498397	0.515387	0.542871	0.544334	0.615091	1.1528	1.15356	1.24176	1.33374	1.36889	1.30076	1.34113	1.31046	1.26935
207	0.962331	0.998987	1.16291	1.17256	1.24148	1.21322	1.20798	1.15291	1.14223	1.2028	1.2427	1.14492	1.26945	1.2273	1.20121	1.19487	1.27971	1.11055	1.1249	1.20906	1.2725	1.25277	1.17893	1.30678	1.3332	1.38796	1.41646	1.32363	1.3815	1.35392	1.31512	1.33953	1.25006	0.533812	0.405416	0.61659	0.647805	0.559679	0.534595	0.487265	0.474732	0.466864	0.472061	0.500653	0.556855	0.573109	0.597766	0.62786	0.629054
208	1.49812	1.5001	1.51897	0.685212	0.710039	0.562564	0.75037	0.695193	0.598943	0.43632	0.43775	0.387013	0.395996	0.366669	0.384333	0.399856	0.428746	0.471418	0.521484	0.538416	0.594058	0.680527	0.72753	0.827513	0.89338	0.963974	0.973888	0.975498	0.958282	0.976875	0.979823	1.01223	0.991874	1.02498	1.05238	1.02068	0.982599	1.02508	1.09395	1.15638	1.33574	1.22061	1.40324	1.43134	1.42318	1.33565	1.34502	1.37334	1.35333
209	0.65987	0.751843	0.842059	0.869712	0.862224	0.843971	0.855408	0.927164	0.896132	0.907125	0.91549	0.920502	0.952567	0.943926	0.942684	1.04357	1.06908	1.12195	1.13349	1.05977	1.11024	1.09379	1.16714	1.0522	1.15012	1.15891	1.20377	1.17006	1.14538	1.08968	1.17293	1.19337	1.27167	1.30289	1.25752	1.31723	1.27734	1.34452	1.35708	1.3848	1.24763	1.15027	1.16934	1.05461	1.14998	1.37239	1.38645	1.40873	1.29272
210	1.61798	1.63134	1.60889	1.52152	1.55586	1.59214	1.59097	1.57407	1.63425	1.60068	1.62779	1.66865	1.68046	1.69732	1.71061	1.77124	1.80691	1.76922	1.74347	1.70727	1.69689	1.73592	1.78662	1.73247	1.73668	1.77641	1.7321	1.70388	1.27023	0.854932	0.767961	0.897518	0.775091	0.743697	0.714899	0.638	0.566091	0.567543	0.569292	0.603048	0.617385	0.653037	0.652611	0.67645	0.736216	0.896108	0.976375	0.963059	0.912569
211	0.712208	0.770741	0.84283	0.865093	0.890387	0.876898	0.889917	0.94545	0.971652	0.966455	0.996732	1.06946	1.10749	1.09014	1.12655	1.18874	1.05479	1.10588	1.06874	1.05784	1.08146	1.0766	1.08016	1.15832	1.14592	1.17277	1.18381	1.13969	1.1201	1.09772	1.07014	1.08029	1.1063	1.12276	1.06195	1.15201	0.976451	1.04469	1.22157	1.26916	1.04692	1.13192	1.15783	1.23873	1.32065	1.30899	1.29904	1.3413	1.34612
212	1.09997	1.3607	1.39773		0.57553	0.572534	0.602751	0.619794	0.665243	0.685823	0.758136	0.734856	0.7616	0.752208	0.790986	0.816257	0.843047	0.934085	0.938316	0.971693	0.981086	0.984165	1.06143	1.08971	1.05394	1.0883	1.25826	1.25222	1.17297	1.22699	1.19508	1.16785	1.17259	1.17453	1.27999	1.30219	1.30201	1.29845	1.3272	1.30487	1.05194	1.16363	1.17221	1.09733	1.0608	1.10163	1.13691	1.17973	1.26046
213	0.877808	0.877939	0.938734	0.962613	1.01369	1.02542	1.0512	0.978725	1.10502	1.10178	1.20769	1.34275	1.34667	1.34289	1.22331	1.29807	1.27471	1.24954	1.28798	1.31666	1.29989	1.2377	1.23501	1.26082	1.20915	1.17371	1.2001	1.24131	1.24294	1.23255	1.187	1.22722	1.24858	1.27749	1.29124	1.33177	1.33384	1.34929	1.40934	1.39727	1.35275	1.32627	1.34218	1.33806	1.38021	1.23148	1.2055	1.33336	1.30112
214	1.10092	1.03384	0.971288	1.03837	1.18878	1.19115	1.19862	1.2223	1.20911	1.13541	1.20393	1.19733	1.19228	1.17748	1.24947	1.26624	1.26381	1.17849	1.29062	1.27871	1.24923	1.26129	1.29804	1.34503	1.33633	1.38043	1.36014	1.38905	1.40198	1.42525	1.43362	1.44904	1.50868	1.51461	1.60668	1.5592	1.56191	1.58021	1.54479	1.58996	1.45928	1.41312	1.4395	1.48489	1.49765	1.49018	1.50585	1.52063	1.49151
215	0.597125	0.660768	0.715186	0.705368	0.699	0.651076	0.648509	0.675276	0.720832	0.737769	0.73376	0.742852	0.77465	0.801108	0.815068	0.841978	0.854825	0.83638	0.89035	0.933624	0.972356	1.07371	1.16007	1.21901	1.20397	1.16382	1.07641	1.09197	1.09418	1.02106	1.07227	1.16827	1.12525	1.20338	1.27259	1.35363	1.12789	1.07209	1.12113	1.1188	1.04798	1.28473	1.50817	1.4552	1.38832	1.22353	1.19595	1.16074	1.16767
216	0.684395	0.750691	0.736909	0.750955	0.758987	0.769173	0.797664	0.846875	0.86987	0.885651	0.881083	0.995845	1.01796	1.04856	1.13995	1.19273	1.08868	1.15096	1.17576	1.19031	1.24079	1.17134	1.16019	1.21795	1.20691	1.14702	1.05574	1.04203	1.08966	1.0446	1.01767	0.92316	1.01172	1.11541	0.904535	0.884785	0.969101	0.928596	0.965776	0.937932	0.969259	0.928581	1.00691	0.993439	0.902733	0.9091	0.857844	1.00542	1.04991
217	0.780814	0.818176	0.798509	0.789327	0.793898	0.770388	0.784412	0.779671	0.782246	0.778772	0.803218	0.909818	0.973757	1.01612	1.12617	1.18269	1.25455	1.33939	1.34056	1.31938	1.38565	1.34536	1.31067	1.38971	1.32168	1.19542	1.07239	1.03684	1.00809	1.04692	1.01599	1.09162	1.09225	1.17842	1.2551	1.28567	1.30147	1.31009	1.23657	1.35393	1.32855	1.26384	1.24917	1.19247	1.25457	1.27042	1.26001	1.2545	1.30486
218	1.03004	1.09784	1.103	1.03467	1.06029	1.07178	1.07093	1.13704	1.08991	1.16071	1.18917	1.23411	1.17129	1.1449	1.12323	0.990582	0.966219	0.993703	1.05948	1.08015	1.05863	1.09958	1.09192	1.01765	1.02509	0.974416	1.12979	1.22478	1.18348	1.19248	1.11247	1.22307	1.21091	1.19795	1.23827	1.26488	1.22769	1.1736	1.11636	1.10015	1.11205	1.08552	1.14464	1.19668	1.24504	1.28588	1.33202	1.37761	1.44592
219	0.664213	0.761661	0.501804	0.906164	0.812385	0.816898	0.856813	0.87739	0.939427	1.06058	1.06475	1.04813	1.02499	0.998235	0.949132	1.00512	1.05296	1.06666	1.1146	1.11235	1.1491	1.24962	1.24093	1.28573	1.34455	1.37534	1.29109	1.35834	1.36192	1.28029	1.22058	1.14535	1.14021	1.09863	1.06218	1.11659	1.1594	1.1671	1.12064	1.13196	1.11496	1.15514	1.23819	1.14205	1.25079	1.17244	1.23934	1.21094	1.19728
220	1.28661	1.4311	1.38286	1.28275	1.15384	1.234	1.17703	1.30241	1.35541	1.28799	1.40121	1.34108	1.1965	1.04629	1.32756	1.35246	1.2932	1.2813	1.36174	1.35056	1.36121	1.34873	1.3604	1.30934	1.40182	1.38833	1.43399	1.41587	1.3882	1.44415	1.54062	1.56587	1.47849	1.43911	1.31262	1.22243	0.54979	0.510693	0.569674	0.690953	0.645882	0.584823	0.575219	0.485555	0.392482	0.432415	0.486807	0.475629	0.480144
221	0.523849	0.593401	0.649878	0.709926	0.782772	0.829171	0.899767	0.979691	1.0252	1.12485	1.11557	1.11817	1.06532	1.03366	1.07238	1.12461	1.09526	1.13293	1.10477	1.15319	1.19299	1.20933	1.18675	1.12193	1.16147	1.17694	1.21895	1.18185	1.21769	1.14351	1.16958	1.17958	1.13897	1.19864	1.20871	1.21509	1.24768	1.23155	1.30518	1.3173	1.20319	1.20749	1.25311	1.22783	1.27589	1.28437	1.29114	1.29954	1.31828
222	0.804805	0.808946	0.840652	0.854402	0.934927	0.941028	0.883864	0.947817	0.993584	1.04992	1.18923	1.21249	1.26336	1.34357	1.35413	1.37441	1.34233	1.40641	1.37461	1.39955	1.32002	1.26639	1.31955	1.30842	1.26128	1.31758	1.38831	1.41006	1.35269	1.43603	1.43041	1.47939	1.39847	1.28986	1.1674	1.19921	1.26502	1.24797	1.3674	1.36413	1.37528	1.33819	1.2934	1.26898	1.25288	1.22359	1.06732	1.11704	1.16411
223	0.752958	0.834549	0.850981	0.864022	0.908174	0.909926	0.954345	0.999787	1.09339	1.11359	1.13412	1.24234	1.19624	1.17854	1.20684	1.19046	1.18644	1.18947	1.11562	1.12626	1.1497	1.14585	1.14892	1.13413	1.21368	1.18322	1.15803	1.17484	1.08935	1.18252	1.19739	1.19585	1.24448	1.17378	1.31419	1.23851	1.20132	1.29326	1.32704	1.28381	1.13599	0.995181	1.03194	1.32463	1.2434	1.2991	1.30542	1.22117	1.17949
224	1.10601	1.0791	1.23314	1.1264	1.21377	1.22808	1.26895	1.18154	1.21538	1.20526	1.25358	1.19008	1.16424	1.22643	1.19809	1.20966	1.21435	1.2446	1.22919	1.19518	1.10319	1.08555	1.28015	1.14461	1.27967	1.2197	1.24538	1.14824	1.27916	1.2696	1.3268	1.37764	1.43696	1.3992	1.40027	1.28326	1.32595	1.17321	1.21939	1.36577	1.27692	1.2064	1.07053	1.31601	1.39784	1.29254	1.3326	1.26751	1.24592
225	1.16255	1.2125	1.24011	1.23562	1.28151	1.1996	1.19159	1.19221	1.26419	1.31499	1.34315	1.28339	1.20318	1.20209	1.21222	1.21641	1.15081	1.20166	1.14891	1.19487	1.10704	1.09056	1.09535	1.10832	1.13253	1.06131	0.96823	1.09513	1.14971	1.11879	1.22204	1.28683	1.14673	1.34121	1.33186	1.4589	1.23201	1.36784	1.40436	1.39049	1.23394	1.28002	1.43663	1.36686	1.27779	1.28421	1.33993	1.32871	1.46437
226	0.820846	0.870664	0.865897	0.887365	0.893566	0.934501	1.0256	1.13896	1.21201	1.27147	1.29538	1.29232	1.10301	1.1499	1.08737	1.08435	1.14645	1.1116	1.07134	1.06311	0.994239	1.212	1.26435	1.20578	1.16678	1.10803	1.04383	1.16726	1.17124	1.07502	1.23633	1.34516	1.28006	1.32525	1.31715	1.40959	1.27999	1.55718	1.40471	1.29771	1.23834	1.35017	1.44647	1.53341	1.516	1.64539	1.65348	1.51095	1.6275
227	0.538376	0.529685	0.561818	0.575786	0.542887	0.529312	0.521756	0.519559	0.483933	0.490747	0.469989	0.445604	0.485102	0.480533	0.537726	0.624804	0.675957	0.698727	0.727338	0.742997	0.755846	0.784813	0.809806	0.866547	0.989213	1.02623	1.03999	1.02685	1.0897	1.09385	1.07784	1.055	1.05908	1.061	1.05569	1.10761	1.11085	1.18091	1.22109	1.27765	1.23195	1.22196	1.24773	1.20973	1.25079	1.24899	1.238	1.30279	1.30818
228	0.514987	0.501039	0.484978	0.467135	0.479619	0.469952	0.461497	0.461979	0.459177	0.453153	0.470149	0.450278	0.428145	0.456548	0.486679	0.521679	0.559527	0.623026	0.685128	0.751367	0.780716	0.805838	0.828503	0.904802	0.953619	0.940887	0.979609	1.016	1.10137	1.20064	1.18881	1.2439	1.25285	1.21684	1.17707	1.17792	1.27443	1.27764	1.31019	1.3687	1.25105	1.26781	1.24913	1.26546	1.29242	1.30576	1.30574	1.32615	1.35021
229	0.874606	0.954355	1.01501	1.03145	1.07184	1.08818	1.08411	1.03953	1.0644	1.0783	1.08769	1.08619	1.01366	0.913566	1.03596	1.12269	1.04264	0.985848	1.07027	1.05153	1.09979	1.10899	1.1208	1.11115	1.04673	0.992878	0.997382	0.967544	1.06258	1.06527	0.955003	1.03446	1.18766	1.33649	1.10282	1.12628	1.35176	1.41327	1.27158	1.38379	1.25485	1.3522	1.29938	1.25234	1.19181	1.36078	1.42585	1.39002	1.48907
230	1.23499	1.24231	1.23339	1.21473	1.23143	1.28778	1.32515	1.3295	1.3701	1.35422	1.43418	1.38069	1.34456	1.3963	1.36902	1.40404	1.41632	1.36111	1.34997	1.35028	1.35999	1.27677	1.26174	1.26828	1.28369	1.26064	1.26333	1.2395	1.29551	1.35168	1.27245	0.762672	1.29296	1.38766	1.35771	1.36366	1.37672	1.37657	1.48293	1.42588	1.37751	1.51643	1.46977	1.38335	1.14063	1.27544	1.23017	1.26514	1.25815
231	1.14867	1.16774	1.13204	1.14485	1.11742	1.15662	1.21863	1.18688	1.19568	1.2151	1.20201	1.25775	1.2999	1.41447	1.4217	1.33124	1.32023	1.37835	1.48003	1.43902	1.29933	1.37262	1.35313	1.35826	1.33468	1.27126	1.27133	1.2648	1.20563	1.21813	1.28839	1.34183	1.33035	1.24737	1.30419	1.30897	1.33048	1.24547	1.16333	1.23516	1.15862	1.25412	1.25182	1.27283	1.23997	1.20085	1.33613	1.20724	1.24755
232	0.874606	0.954355	1.01501	1.03145	1.07184	1.08818	1.08411	1.03953	1.0644	1.0783	1.08769	1.08619	1.01366	0.913566	1.03596	1.12269	1.04264	0.985848	1.07027	1.05153	1.09979	1.10899	1.1208	1.11115	1.04673	0.992878	0.997382	0.967544	1.06258	1.06527	0.955003	1.03446	1.18766	1.33649	1.10282	1.12628	1.35176	1.41327	1.27158	1.38379	1.25485	1.3522	1.29938	1.25234	1.19181	1.36078	1.42585	1.39002	1.48907
233	1.31943	1.37565	1.35603	1.31811	1.34154	1.37713	1.38121	1.41376	1.44193	1.45572	1.27861	1.20228	1.29495	1.27133	1.30158	1.33788	1.33384	1.36127	1.3295	1.37349	1.35213	1.17298	1.15652	1.24257	1.34427	1.39612	1.47331	1.49815	1.34407	1.09601	1.14995	1.23248	1.35081	1.36126	1.42401	1.49301	1.52853	1.56528	1.56561	1.44633	1.39059	1.40328	1.4605	1.46326	1.53767	0.821273	0.884415	0.864374	0.898968
234	1.03698	1.08254	1.13686	1.23668	1.29306	1.33186	1.33761	1.20715	1.22446	1.23553	1.13416	1.1859	1.27994	1.32455	1.23073	1.24963	1.22982	1.15864	1.11833	1.20363	1.19945	1.29382	1.31124	1.3051	1.29327	1.29989	1.30826	1.3325	1.30225	1.31487	1.44651	1.57363	1.46106	1.53887	1.54903	1.32915	1.6669	1.68959	1.42774	1.33007	1.61392	1.28207	1.25567	1.2405	1.19908	1.3618	1.48642	1.50749	1.51355
235	0.927556	0.997639	1.04815	1.1068	1.19358	1.25338	1.29219	1.38908	1.3438	1.34321	1.43329	1.44026	1.29105	1.24833	1.28855	1.28939	1.32453	1.25958	1.1825	1.15156	1.13377	1.13583	1.12983	1.24169	1.29024	1.32096	1.33317	1.32656	1.26255	1.27932	1.31374	1.33466	1.39624	1.42894	1.38838	1.37632	1.28498	1.30069	1.29633	1.33742	1.21998	1.26893	1.26216	1.31431	1.316	1.31543	1.29884	1.36084	1.42559
236	1.02598	1.07999	1.10886	1.14538	1.18116	1.20457	1.21719	1.24975	1.33139	1.32328	1.35256	1.34038	1.33677	1.36072	1.31199	1.31821	1.30897	1.31919	1.36776	1.3825	1.40368	1.37747	1.43379	1.42679	1.39485	1.40953	1.40774	1.37665	1.38602	1.43609	1.45282	1.48118	1.47267	1.46844	1.49802	1.50908	1.52632	1.56018	1.4621	1.52411	1.08521	1.07434	1.15139	1.18226	1.18333	1.23597	1.27001	1.27636	1.24233
237	0.762825	0.797385	0.851824	0.894568	0.952507	0.987154	1.02255	1.06157	1.14096	1.169	1.20525	1.24752	1.32536	1.27091	1.25618	1.23835	1.19207	1.22163	1.22001	1.16647	1.16292	1.19812	1.19222	1.13577	1.18677	1.12335	1.14829	1.17514	1.14263	1.20148	1.16959	1.2335	1.26675	1.22627	1.28811	1.24615	1.2142	1.28784	1.29773	1.34122	1.32342	1.36681	1.34732	1.34539	1.3548	1.34264	1.29193	1.30838	1.3048
238	0.616562	0.66629	0.721801	0.719531	0.722376	0.739496	0.749801	0.770779	0.787163	0.875697	0.970008	1.03684	1.03268	1.06746	1.10741	1.13035	1.13772	1.13689	1.18562	1.18799	1.18867	1.18681	1.17393	1.09969	0.975846	0.99798	1.04564	1.04126	1.04347	1.03331	1.05691	1.07478	1.03763	1.03701	1.02672	1.04529	1.06413	1.10907	1.18614	1.09395	1.08797	1.05603	1.02442	1.0144	1.08655	1.14908	1.1711	1.21268	1.22791
239	0.842773	0.869818	0.903782	0.973534	1.00704	1.10993	1.08113	1.0243	1.02321	1.06439	1.06203	1.12473	1.1512	1.13414	1.15631	1.22689	1.18537	1.2104	1.14476	1.15796	1.23218	1.26329	1.38513	1.35537	1.34114	1.40328	1.45274	1.37564	1.37454	1.39753	1.35351	1.4757	1.50093	1.44558	1.24295	1.32648	1.36481	1.41464	1.38866	1.24647	1.21038	1.29079	1.24889	1.17039	1.14015	1.14537	1.17657	1.15891	1.18629
240	0.701086	0.731894	0.774682	0.815904	0.856163	0.949186	1.02689	1.01488	0.978767	0.942619	1.00533	0.961834	0.903417	0.951223	0.979198	1.11518	1.14379	1.18932	1.23223	1.28135	1.19218	1.1449	1.2327	1.27974	1.36081	1.32494	1.34154	1.29752	1.08555	1.12869	1.10682	1.1602	1.20482	1.0945	1.16726	1.2248	1.17414	1.07051	1.14303	1.08149	1.22795	1.2116	1.05648	1.1092	1.10416	1.2097	1.26097	1.22521	1.14375
241	1.27685	1.26589	1.28903	1.25309	1.30106	1.30946	1.23455	1.20536	1.28916	1.33171	1.34154	1.43299	1.35253	1.37824	1.29776	1.35978	1.38193	1.32714	1.34238	1.30514	1.42748	1.36913	1.23749	1.22012	1.11758	1.1529	1.19383	1.23631	1.15041	0.849968		0.569243	0.494564	0.70387	0.689381	0.589408	0.563905	0.489261	0.420516	0.429796	0.442186	0.447185	0.418992	0.444156	0.458275	0.456092	0.457528	0.454074	0.458958
242	1.14929	1.2171	1.21938	1.21422	1.25103	1.26128	1.26995	1.14198	1.31041	1.35597	1.32704	1.33869	1.43498	1.31285	1.34288	1.34211	1.36221	1.25625	1.32209	1.3212	1.48647	1.50926	1.41401	1.39974	1.46693	1.48943	1.48912	1.5773	1.52178	1.42772	1.36561	1.30299	1.39882	1.49162	1.28089	1.61978	1.4306	1.40957	1.37718	1.33219	1.40603	1.51045	1.56733	1.38678	1.40992	1.37453	0.822877	0.65218	0.670889
243	0.554882	0.621257	0.695498	0.729824	0.622906	0.552743	0.565131	0.511475	0.565126	0.621478	0.645673	0.678144	0.707713	0.732798	0.727357	0.764424	0.797393	0.786648	0.819951	0.85132	0.839554	0.944956	0.919222	0.91946	0.801357	0.898478	0.883178	1.04891	1.08753	0.981331	0.879495	0.770307	0.978428	0.881236	0.938213	1.04077	1.1693	0.9864	1.23021	1.1659	1.2116	1.09118	1.09461	1.27271	1.21517	1.14079	1.14501	1.13467	1.1108
244	0.834985	0.841125	0.815163	0.834973	0.848806	0.907299	0.966185	1.08247	1.14185	1.0786	1.10372	1.13197	1.1276	1.08684	1.06259	1.10745	1.11538	1.15507	1.00326	1.20679	1.22414	1.25599	1.24357	1.23487	1.23899	1.29235	1.20522	1.31538	1.09276	1.31593	1.15682	0.929189	1.12698	1.25374	1.05827	1.26089	1.22811	1.28769	1.39451	1.2398	1.1052	0.884363	1.17712	1.15604	1.16329	1.05433	1.2339	1.31787	1.40948
245	1.07755	1.05709	1.11745	1.06169	1.04086	1.01856	0.987238	1.05146	1.01392	1.0645	1.06789	1.04266	1.03101	1.0947	1.05083	1.06127	1.0468	1.13845	1.1655	1.20168	1.20081	1.24105	1.22169	1.15693	1.12708	1.10917	1.13017	1.12223	1.16673	1.13462	1.12056	1.16224	1.16601	1.15118	1.21457	1.2072	1.19777	1.14603	1.14879	1.17109	1.18361	1.14749	1.19858	1.18433	1.22375	1.23491	1.19385	1.27955	1.26831
246	0.955272	1.14586	1.31263	1.29981	1.35331	1.2878	1.22812	1.17657	1.30331	1.26621	1.36048	1.4945	1.43399	1.29221	1.25898	1.35036	1.3272	1.28891	1.31781	1.50295	1.06974	1.13157	1.14417	1.21275	1.34977	1.42598	0.766314	0.702188	0.955831	0.894872	0.864072	0.78354	0.702186	0.707118	0.733034	0.747423	0.804552	0.719253	0.759292	0.810896	0.790059	0.86198	0.884844	0.941874	0.923834	0.925296	0.972671	0.976028	0.987621
247	1.03698	1.08254	1.13686	1.23668	1.29306	1.33186	1.33761	1.20715	1.22446	1.23553	1.13416	1.1859	1.27994	1.32455	1.23073	1.24963	1.22982	1.15864	1.11833	1.20363	1.19945	1.29382	1.31124	1.3051	1.29327	1.29989	1.30826	1.3325	1.30225	1.31487	1.44651	1.57363	1.46106	1.53887	1.54903	1.32915	1.6669	1.68959	1.42774	1.33007	1.61392	1.28207	1.25567	1.2405	1.19908	1.3618	1.48642	1.50749	1.51355
248	0.677005	0.787533	0.820043	0.842896	0.878776	0.893598	0.960668	0.966904	0.884952	0.847762	0.894028	0.93372	1.02118	0.984419	0.993572	0.935628	1.01734	1.05471	1.06675	1.0097	1.07079	1.04281	1.0605	1.06235	1.16213	1.17262	1.21874	1.21312	1.28801	1.25997	1.25911	1.31343	1.3253	1.37605	1.27627	1.40125	1.41557	1.38337	1.4345	1.45196	1.3098	1.38731	1.39192	1.43779	1.44002	1.42407	1.39368	1.44616	1.40191
249	1.12871	1.18256	1.14948	1.1963	1.18506	1.17553	1.20408	1.25844	1.247	1.29117	1.26932	1.34347	1.34219	1.32238	1.32335	1.1913	1.14824	1.1283	1.15889	1.23221	1.16885	1.1715	1.03262	1.12166	1.09051	1.17293	1.11178	1.17933	1.15505	1.22801	1.34799	1.24701	1.2364	1.28778	1.30499	1.25592	1.22399	1.18675	1.23875	1.37984	1.39481	1.34892	1.37303	1.3333	1.25437	1.2878	1.31061	1.34224	1.36074
250	0.97186	0.960698	0.918908	0.905039	0.90254	0.963377	0.919423	0.934506	0.81277	0.743992	0.724954	0.669057	0.638824	0.651004	0.60003	0.654153	0.683447	0.735053	0.874917	0.941745	1.04543	1.07861	1.21927	1.21026	1.27308	1.29585	1.31615	1.27913	1.29928	1.31728	1.2531	1.23893	1.30092	1.24559	1.23615	1.25482	1.23056	1.27731	1.28495	1.37241	1.25598	1.32932	1.36131	1.41468	1.41766	1.40292	1.43897	1.35909	1.33634
251	1.02068	1.01005	1.04833	1.01629	1.01191	1.0284	1.04377	1.05549	1.05681	1.1169	1.06055	1.10874	1.06831	1.07541	1.15029	1.20966	1.16368	1.16629	1.18854	1.19201	1.20175	1.19719	1.20274	1.17532	1.27717	1.21992	1.2591	1.34277	1.24463	1.32085	1.24758	1.40244	1.35733	1.4103	1.3082	1.42587	1.33961	1.36105	1.39838	1.36207	1.29128	1.2889	1.31172	1.32135	1.29021	1.33837	1.40908	1.37946	1.39347
252	0.667815	0.738882	0.740521	0.724606	0.716502	0.712261	0.692951	0.710756	0.727953	0.730055	0.788858	0.789322	0.776503	0.778691	0.803334	0.826239	0.852992	0.822204	0.827783	0.928736	0.919659	0.988015	0.953555	1.17257	1.19286	1.25122	1.20521	1.24618	1.26736	1.30473	1.29565	1.21569	1.25433	1.26876	1.31418	1.37352	1.38417	1.3768	1.36596	1.18521	1.0821	1.0854	1.2704	1.24211	1.27568	1.24273	1.2941	1.23061	1.41724
253	0.48857	0.518011	0.471876	0.440737	0.472534	0.46513	0.495964	0.565741	0.604595	0.630713	0.650169	0.708106	0.750782	0.769872	0.789093	0.750215	0.846261	0.87043	0.95318	0.97936	0.950282	1.08916	1.04203	0.988539	1.06625	1.04829	1.07928	1.05034	1.07057	1.08055	1.14137	0.999143	0.909227	0.886582	0.986386	1.02089	0.991054	1.05677	0.900006	1.00709	0.933006	0.978885	1.19307	1.19996	1.17615	1.09196	1.06125	0.965519	1.07482
254	0.884822	0.905714	0.904997	0.898692	0.906324	0.889179	0.90758	0.967319	1.00494	0.993493	1.03371	1.03041	1.01717	0.981493	1.03958	1.07639	1.06686	1.08457	1.07705	1.07648	1.15006	1.11562	1.13554	1.14855	1.19701	1.18701	1.21128	1.24928	1.23735	1.28648	1.29628	1.29787	1.20465	1.20664	1.18937	1.19303	1.17419	1.16271	1.16901	1.05482	1.12513	1.20428	1.18935	1.17672	1.2503	1.21469	1.28362	1.27997	1.27129
255	0.448164	0.44519	0.424942	0.43828	0.411877	0.397462	0.387878	0.378949	0.426477	0.393579	0.391637	0.385171	0.360535	0.371255	0.394543	0.395326	0.370186	0.394681	0.398791	0.40628	0.412451	0.434978	0.440709	0.399906	0.408823	0.393669	0.39845	0.406783	0.424106	0.419893	0.433981	0.41402	0.414016	0.42276	0.38781	0.397251	0.404607	0.414502	0.418491	0.424057	1.26964	1.25117	1.25841	1.39583	1.33194	1.35046	1.29863	1.2292	1.18973
256	1.36119	1.37723	1.32465	1.27601	1.20373	1.21458	1.17702	1.11272	1.15555	1.26455	1.21433	1.2462	1.16902	1.31427	1.2988	1.24367	1.22352	1.26207	1.36488	1.42054	1.4942	1.50367	1.52744	1.53619	1.55509	1.60294	1.57583	1.54713	1.46386	1.35916	1.30827	1.31235	1.33336	1.26891	1.26235	1.33438	1.35296	1.3147	1.25689	1.27467	1.11883	1.19464	1.27148	1.30958	1.28169	1.23883	1.27661	1.40166	1.48418
257	1.09128	1.21558	1.12577	1.17888	1.13323	1.26221	1.25373	1.19343	1.23063	1.21699	1.17556	1.19058	1.20661	1.21742	1.22402	1.2505	1.27854	1.29754	1.33546	1.27643	1.25498	1.31155	1.32398	1.36525	1.28551	1.33217	1.36716	1.39091	1.42252	1.38719	1.36731	1.31059	1.27552	1.24503	1.22796	1.16879	1.20115	1.18571	1.32012	1.07127	1.05809	1.18738	1.25586	1.27656	1.25316	1.3343	1.31708	1.292	1.26316
258	0.995138	1.06321	1.07379	1.08473	1.10061	1.12125	1.09041	1.04208	1.12251	1.05283	1.16194	1.15166	1.13873	1.16352	1.17037	1.20336	1.21763	1.20895	1.20303	1.22777	1.26957	1.28568	1.32171	1.28608	1.26853	1.33994	1.29268	1.31215	1.3574	1.43761	1.42215	1.39473	1.51442	1.4747	1.4646	1.45474	1.53415	1.4814	1.52204	1.50511	1.45343	1.41176	1.4113	1.44517	1.48747	1.47761	1.4024	1.33621	1.30884
259	0.793383	0.809861	0.762875	0.839017	0.91443	0.957076	1.25533	1.16428	1.21466	1.38101	1.35981	1.38405	1.33516	1.37766	1.40994	1.45662	1.43477	1.32386	1.40691	1.39569	1.27926	1.2913	1.27325	1.3168	1.45653	1.43729	1.53292	1.58953	1.5094	1.58106	1.56651	1.56681	1.4971	1.4623	1.43101	1.25456	1.12879	1.28642	1.477	1.50072	1.4517	1.38305	1.31982	1.29597	1.33048	1.3569	1.32855	1.34941	1.34688
260	1.33269	1.34771	1.33564	1.38347	1.37358	1.33799	1.35383	1.36776	1.37966	1.31999	1.33785	1.33377	1.25723	1.321	1.23962	1.32433	1.27076	1.1863	1.28586	1.28608	1.35778	1.33739	1.35004	1.36593	1.36131	1.27438	1.4217	1.43764	1.34823	1.43295	1.39943	1.30104	1.4683	1.46779	1.2219	1.30061	1.39002	1.39981	1.23782	1.39009	1.19037	1.2943	1.17189	0.904519	1.08837	1.62264	1.6209	1.74391	1.65629
261	1.00056	0.944166	0.99461	0.999099	1.0158	0.954192	0.911099	0.936667	0.978032	1.0609	1.05405	1.1167	1.09496	1.27447	1.23078	1.26731	1.20631	1.32724	1.32897	1.33434	1.34121	1.37248	1.35554	1.24738	1.28358	1.27068	1.33583	1.5774	1.55912	1.61468	1.29876	1.73074	1.80315	1.6514	1.63476	1.67363	1.60014	1.62938	1.61755	1.62495	1.56363	1.32658	1.35518	1.37353	1.47267	1.48122	1.5152	1.50268	1.48242
262	0.766482	0.817668	0.749603	0.742226	0.885812	0.93829	1.06218	1.06985	1.16111	1.19706	0.836834	0.934585	0.848062	0.919797	0.934802	0.910268	0.986697	0.886708	0.831468	1.03302	1.11704	1.11863	1.22988	1.11403	1.22255	1.2585	1.24302	1.32579	1.6762	1.6755	1.71928	1.42838	1.26507	1.11226	1.20741	1.28925	1.39369	1.38676	1.38942	1.47214	1.38611	1.32804	1.28706	1.26599	1.42072	1.41295	1.37477	1.55051	1.45305
263	0.986717	1.07063	1.06822	1.15019	1.20988	1.269	1.29397	1.3144	1.40066	1.42486	1.48431	1.35981	1.29079	1.33575	1.31803	1.21645	1.30042	1.4173	1.43088	1.1493	1.24078	1.24103	1.2151	1.30851	1.33576	1.40493	1.43643	1.54903	1.5449	1.39955	1.377	0.682902	0.637483	0.590917	0.705527	0.750854	0.775799	0.680143	0.571675	0.570175	0.560263	0.575712	0.610026	0.608421	0.620612	0.559051	0.645267	0.68544	0.751416
264	1.21834	1.23266	1.22798	1.33	1.38554	1.39241	1.3694	1.47674	1.27942	1.29214	1.41852	1.37444	1.27626	1.29913	1.33753	1.39473	1.48974	1.47392	1.50023	1.5041	1.43043	1.42701	1.47958	1.41015	1.29972	1.24828	1.32048	1.42907	1.48237	1.49527	1.49816	1.50777	1.53014	1.45404	1.50958	1.5328	1.59837	1.57468	1.57601	1.46084	1.4133	1.4366	1.38908	1.46911	1.60446	1.71209	1.6537	1.65871	1.60028
265	0.960789	0.952048	1.0409	1.09531	1.11781	1.13133	0.985686	0.94231	1.10275	1.00645	1.09494	1.10376	1.08585	1.03181	1.26752	1.26255	1.14059	0.775956	1.08332	0.933096	0.969118	0.909226	0.971897	1.01412	0.915818	0.864076	1.05968	1.05097	1.04797	1.12536	1.04556	1.06685	1.04081	1.02814	1.08592	0.946262	1.01963	1.03292	1.18619	0.791581	1.0057	1.03611	0.956435	1.10572	1.16772	1.3694	1.35939	1.30961	1.42447
266	0.516005	0.561133	0.61294	0.619004	0.597678	0.585616	0.630935	0.650836	0.665736	0.715055	0.751285	0.784604	0.772419	0.86781	0.927507	0.994241	1.03227	0.970778	1.05276	1.06747	1.11192	1.13585	1.18724	1.24389	1.25543	1.25129	1.24243	1.3187	1.18058	1.08768	1.13746	1.19637	1.24407	1.24147	1.32404	1.3723	1.35601	1.41437	1.3669	1.25534	1.18793	1.22815	1.35168	1.38314	1.41674	1.42343	1.41886	1.32726	1.17309
267	1.06469	1.15373	1.12866	1.09343	1.10467	1.11611	1.16254	1.14339	1.23887	1.22943	1.25241	1.31936	1.29143	1.3194	1.29794	1.28775	1.32292	1.30838	1.36435	1.35382	1.42395	1.46981	1.43426	1.39764	1.40634	1.36696	1.46488	1.46366	1.44619	1.43084	1.43501	1.45684	1.43677	1.41813	1.42469	1.43981	1.3941	1.4603	1.47345	1.46541	1.42626	1.43735	1.36998	1.37337	1.30995	1.32909	1.46782	0.638312	0.571499
268	0.807831	0.836614	0.856848	0.895914	0.88827	0.920386	0.94525	0.98497	1.0349	1.04443	1.10573	1.17863	1.21607	1.27859	1.30944	1.37251	1.42327	1.44312	1.42141	1.40162	1.36675	1.41044	1.44665	1.41225	1.36972	1.35708	1.35373	1.33907	1.29466	1.30706	1.2725	1.20421	1.21079	1.24006	1.20368	1.22218	1.3265	1.28749	1.34344	1.2953	1.20942	1.22653	1.20175	1.22544	1.28139	1.25889	1.28145	1.31574	1.34498
269	1.61798	1.63134	1.60889	1.52152	1.55586	1.59214	1.59097	1.57407	1.63425	1.60068	1.62779	1.66865	1.68046	1.69732	1.71061	1.77124	1.80691	1.76922	1.74347	1.70727	1.69689	1.73592	1.78662	1.73247	1.73668	1.77641	1.7321	1.70388	1.27023	0.854932	0.767961	0.863638	0.747132	0.752301	0.758189	0.650245	0.643647	0.60248	0.585889	0.630188	0.625589	0.602987	0.615749	0.601077	0.583287	0.61972	0.625904	0.633264	0.623737
270	1.3337	1.40704	1.38805	1.29384	1.39	1.39715	1.42189	1.42318	1.42734	1.39821	1.44415	1.44901	1.47264	1.41127	1.44835	1.48952	1.53861	1.50173	1.54824	1.5624	1.58206	1.56481	1.5284	1.5154	1.53369	1.53146	1.48625	1.45232	1.47982	1.49529	1.44575	1.53267	1.48776	1.52892	1.54973	1.60531	1.61998	1.51407	1.5263	1.54426	1.43426	1.44488	1.42061	1.46075	1.41483	1.41087	1.46949	1.56442	1.52601
271	1.00824	1.01406	1.0585	1.05438	1.14864	1.15962	1.1588	1.20942	1.16824	1.21603	1.215	1.29103	1.3226	1.32366	1.3627	1.37019	1.39158	1.38824	1.39859	1.37836	1.44337	1.46092	1.43239	1.40138	1.42805	1.39375	1.41082	1.44718	1.3937	1.42247	1.43975	1.35559	1.39726	1.40415	1.40444	1.42696	1.41726	1.44226	1.47757	1.58653	0.712214	0.735046	0.857089	0.875907	0.874303	0.776947	0.68486	0.625331	0.608473
272	0.600014	0.577789	0.556798	0.541124	0.528257	0.538104	0.546811	0.524902	0.531755	0.517041	0.510378	0.488258	0.534956	0.532428	0.500795	0.506824	0.491423	0.523762	0.537772	0.540608	0.591591	0.649669	0.658447	0.825173	0.819012	0.826715	0.879086	0.926426	1.00103	1.07701	1.11167	1.12968	1.09005	1.07647	1.08738	1.07795	1.14752	1.21544	1.22555	1.20148	1.14738	1.21171	1.31595	1.33014	1.3682	1.3301	1.35233	1.32903	1.25896
273	1.1447	1.11098	1.14108	1.1514	1.16228	1.24089	1.32856	1.40156	1.45806	1.42975	1.44065	1.49354	1.41813	1.46625	1.46323	1.30653	1.24898	1.25009	1.29946	1.41039	1.39361	1.35441	1.28771	1.33227	1.35011	1.45651	1.49529	1.50957	1.56031	1.52858	1.50611	1.55557	1.56043	1.61841	1.68042	1.52101	1.41271	1.4056	1.3692	1.34451	1.18287	1.27575	1.41491	1.39971	1.3985	1.41952	1.47885	1.51927	1.56218
274	0.524061	0.521146	0.495535	0.506052	0.510718	0.500362	0.498763	0.518604	0.500831	0.516872	0.56565	0.639853	0.704611	0.747483	0.755744	0.794017	0.823466	0.881151	0.930086	0.996109	0.993712	1.01904	1.02876	1.0557	1.0505	1.04049	1.09204	1.15704	1.1666	1.19335	1.27177	1.37897	1.38052	1.34701	1.28021	1.1198	1.18966	1.2982	1.28156	1.34186	1.24943	1.33286	1.14571	1.25064	1.34611	1.30508	1.35425	1.40644	1.38375
275	0.682585	0.726215	0.705377	0.670598	0.765975	0.756117	0.766051	0.810385	0.86257	0.83978	0.855132	0.861575	0.809821	0.855136	0.888949	0.95871	1.00108	0.930447	0.963558	1.04961	1.13389	1.15784	1.14479	1.03376	1.06683	1.16376	1.24739	1.01067	1.18456	1.28284	1.20519	1.31309	1.15311	1.1519	1.20028	1.27839	1.2833	1.27723	1.31608	1.25858	1.14781	1.19747	1.28493	1.17488	1.24209	1.32662	1.32828	1.23023	1.31007
276	1.18381	1.23238	1.11973	1.00346	1.09694	1.13566	1.07566	1.16549	1.19302	1.16283	1.19569	1.16849	1.12249	1.15515	1.17834	1.20133	1.19365	1.18597	1.26836	1.09579	1.17012	1.33427	1.41465	1.26399	1.28367	1.26672	1.30336	1.37656	1.32023	1.36413	1.35301	1.35849	1.31387	1.21697	1.4049	1.52066	1.4804	1.36049	1.29739	1.29129	1.28864	1.37488	1.47456	1.36128	1.36369	1.38599	1.36766	1.41413	1.44055
277	1.05479	1.05965	1.08084	1.15722	1.17772	1.13168	1.09921	1.19946	1.18324	1.23329	1.21377	1.21339	1.13397	1.12996	1.19143	1.26032	1.28447	1.22996	1.2025	1.16571	1.08219	1.14535	1.14063	1.27315	1.22431	1.1869	1.14275	1.28962	1.32344	1.34213	1.28247	1.24109	1.24851	1.19939	1.35095	1.48372	1.45914	1.5328	1.53254	1.52123	1.47471	1.49244	1.50662	1.44815	1.4868	1.48815	1.45432	1.39236	1.46661
278	1.13151	1.16554	1.19665	1.19249	1.26781	1.27881	1.25322	1.20955	1.16188	1.19804	1.14434	1.24618	1.33529	1.35628	1.43577	1.39114	1.37321	1.38021	1.30718	1.34658	1.37383	1.3552	1.35185	1.33237	1.37648	1.39478	1.35473	1.20188	1.16582	1.1735	1.1651	1.18318	1.08666	1.24451	1.30643	1.37062	1.29985	1.31352	1.10693	1.1549	1.2547	1.32472	1.30377	1.27942	1.27763	1.3232	1.42096	1.43632	1.398
279	0.890659	0.937799	0.927768	0.925277	0.890597	0.8744	0.903243	0.90269	1.02276	1.04762	1.01768	1.08568	1.05872	1.02397	1.11315	1.03863	1.15116	1.19393	1.16278	1.12804	1.15548	1.07523	1.1239	1.14618	1.11214	1.12082	1.08095	1.04648	1.01037	1.06193	1.06668	1.01244	1.01669	1.06002	1.13146	1.15332	1.17357	1.18332	1.15804	1.21915	1.22342	1.23813	1.2554	1.33156	1.29841	1.34883	1.34215	1.28938	1.33013
280	1.03044	1.08821	1.20699	1.26122	1.30763	1.2899	1.35385	1.41062	1.49264	1.52638	1.47111	1.39839	1.37024	1.3649	1.32473	1.36003	1.30852	1.2828	1.26862	1.26311	1.26941	1.32492	1.42991	1.50276	1.55304	1.54394	1.54355	1.59155	1.6227	1.65151	1.6191	1.62106	1.58234	1.57261	1.52061	1.59517	1.54985	1.66147	1.63273	1.5115	0.764569	0.754602	0.83684	0.647845	0.661363	0.640806	0.659566	0.616999	0.560709
281	1.24464	1.26855	1.31122	1.29388	1.29106	1.24688	1.28585	1.21476	1.227	1.34698	1.31035	1.31173	1.3315	1.38151	1.3415	1.34432	1.31764	1.29694	1.24112	1.25886	1.20288	1.21292	1.21375	1.29976	1.35538	1.33578	1.30261	1.26468	1.1288	1.30026	1.4001	1.32638	1.41198	1.22912	1.28588	1.40581	1.2983	1.3284	1.25547	1.36548	1.29111	1.25357	1.30021	1.3544	1.42224	1.39041	1.37246	1.45453	1.51375
282	0.89122	1.01	1.08476	1.14537	1.23851	1.19736	1.16928	1.25834	1.25328	1.222	1.13296	1.19211	1.25869	1.34265	1.30697	1.29525	1.19665	1.2115	1.28112	1.33791	1.35779	1.38619	1.39838	1.34414	1.36638	1.35536	1.40115	1.43858	1.29935	1.3168	1.30102	1.26638	1.20687	1.2899	1.27927	1.32268	1.34339	1.41762	1.44383	1.37869	1.32501	1.42695	0.921741	0.648819	0.687163	0.564829	0.735751	0.676905	0.622022
283	0.71832	0.783631	1.06065	1.06182	1.15185	1.23404	1.17185	1.21679	1.1738	1.16579	1.15265	1.14217	1.18091	1.2911	1.1427	1.08003	1.11912	1.07464	1.23009	1.19134	1.14505	1.31639	1.33493	1.11234	1.24494	1.23058	0.965832	0.9156	1.33588	1.30072	1.41956	1.4262	1.38909	1.38748	1.25147	1.35941	1.47681	1.51669	1.50617	0.942313		1.30795	1.44137	0.78869	0.73415	0.781188	0.633266	0.547132	0.620921
284	0.997596	1.10029	1.13466	1.11775	1.12509	1.11695	1.12251	1.04725	1.11749	1.19563	1.20337	1.11561	1.08996	1.10713	1.1234	1.10197	1.1656	1.16955	1.26982	1.19499	1.27869	1.27318	1.16582	1.26361	1.273	1.1836	1.27502	1.22077	1.09661	1.18944	1.15132	1.13137	1.17428	1.2894	1.25508	1.27435	1.31292	1.38408	1.4184	1.352	1.35564	1.20814	1.21084	1.26481	1.25864	1.39735	1.47258	1.4387	1.39093
285	1.34864	1.42576	1.3863	1.44437	1.38018	1.33457	1.35031	1.08123	1.07899	1.10738	1.13585	1.05777	1.01461	1.20557	1.25776	1.31805	1.31988	1.28599	1.19671	1.23673	1.29784	1.24888	1.24374	1.13013	1.12936	1.18243	1.23802	1.18402	1.13313	1.20318	1.18417	1.19154	1.30314	1.2082	1.2158	1.18607	1.14989	1.25674	1.23851	1.2929	1.21102	1.28159	1.19822	1.24947	1.32563	1.39815	1.25746	0.6998	0.614977
286	0.777966	0.825139	0.847625	0.856465	0.947115	0.969803	0.994284	1.02651	1.10932	1.08486	1.11074	1.10534	1.08536	1.08227	1.14265	1.16132	1.15759	1.15799	1.12116	1.183	1.1906	1.20259	1.19614	1.22187	1.22589	1.25558	1.2653	1.30358	1.34667	1.3659	1.34332	1.43805	1.4175	1.46576	1.42227	1.48666	1.50251	1.45599	1.41859	1.35319	1.29105	1.34721	1.37705	1.40625	1.46036	1.55496	1.5423	1.5459	1.31767
287	0.836741	0.869089	0.880697	0.91324	0.960088	0.910653	0.963877	1.01234	0.973577	0.997175	1.02352	1.00791	0.971787	0.997912	1.04633	1.08485	1.1916	1.18411	1.23411	1.20849	1.29508	1.25097	1.25828	1.11575	1.18509	1.23343	1.25764	1.37429	1.30318	1.17076	1.25861	1.26863	1.20243	1.29374	1.19018	1.24891	1.365	1.2393	1.23162	1.22677	1.05217	0.872157	0.853665	0.940951	0.501782	0.565108	0.391162	0.731368	0.590585
288	1.21789	1.23528	1.28622	1.28012	1.2975	1.31755	1.31999	1.34618	1.35445	1.37107	1.36605	1.40152	1.36344	1.38316	1.3866	1.38914	1.42524	1.43251	1.45595	1.3478	1.30139	1.26754	1.30112	1.31362	1.30138	1.3	1.28105	1.24284	1.2254	1.26416	1.26967	1.32055	1.3529	1.3262	1.41641	1.37302	1.47377	1.49357	1.40876	1.36017	1.36423	1.37261	1.37892	1.41146	1.49989	1.47184	1.56104	1.62901	1.54036
289	1.20337	1.27705	1.27939	1.28973	1.33116	1.29721	1.35904	1.31153	1.3371	1.32018	1.32391	1.37348	1.34504	1.33424	1.32104	1.28422	1.26456	1.24143	1.26966	1.30416	1.2181	1.27619	1.26777	1.25745	1.34335	1.39908	1.36255	1.39963	1.33237	1.33721	1.32364	1.31301	1.33218	1.32211	1.37225	1.3896	1.34901	1.27923	1.34702	1.41241	1.34435	1.39815	1.37329	1.388	1.44489	1.41744	1.4337	1.44758	1.44002
290	1.27367	1.27256	1.30352	1.2499	1.28774	1.27129	1.19946	1.21364	1.18296	1.14937	1.12625	1.13348	1.14077	1.15227	1.10888	1.16893	1.15126	1.23373	1.23817	1.29076	1.31149	1.28066	1.2595	1.23378	1.24594	1.26791	1.30122	1.37975	1.33709	1.38885	1.36702	1.40863	1.38974	1.34373	1.36434	1.33005	1.24584	1.31681	1.31054	1.30779	1.2562	1.3254	1.33168	1.41564	1.49124	1.49657	1.54503	1.60421	1.57364
291	0.524061	0.521146	0.495535	0.506052	0.510718	0.500362	0.498763	0.518604	0.500831	0.516872	0.56565	0.639853	0.704611	0.747483	0.755744	0.794017	0.823466	0.881151	0.930086	0.996109	0.993712	1.01904	1.02876	1.0557	1.0505	1.04049	1.09204	1.15704	1.1666	1.19335	1.27177	1.37897	1.38052	1.34701	1.28021	1.1198	1.18966	1.2982	1.28156	1.34186	1.24943	1.33286	1.14571	1.25064	1.34611	1.30508	1.35425	1.40644	1.38375
292	0.895431	0.996062	1.08197	1.04589	1.14947	1.14207	0.979839	1.11013	1.10702	1.23007	1.33506	1.29491	1.26916	1.22761	1.15792	1.30574	1.2159	1.19609	1.25657	1.11216	1.08949	1.07084	1.02605	1.26139	1.25696	1.11547	1.21972	1.25876	1.37536	1.31181	1.34921	1.27792	1.30527	1.31182	1.29952	1.32541	1.29529	1.40036	1.35497	1.3189	1.08444	1.22467	1.53855	1.30114	1.30422	1.46021	1.13524	1.15377	0.777485
293	1.34578	1.48558	1.49426	1.50944	1.43618	1.39551	1.32642	1.1591	1.23929	1.33291	1.20851	1.30082	1.40503	1.44545	1.55635	1.62303	1.52246	1.56666	1.76405	1.74918	0.864357	0.690732	0.739723	0.770709	0.774658	0.593303	0.645476	0.50524	0.512315	0.56802	0.713648	0.70025	0.721203	0.726739	0.822431	0.850561	0.881015	0.676086	0.754024	0.768146	0.719979	0.703817	0.673335	0.736379	0.778082	0.753217	0.729593	0.741911	0.820308
294	1.20495	1.36909	1.22349	1.23384	1.22927	1.27842	1.29009	1.22043	1.25937	1.15791	1.24891	1.32995	1.22117	1.34501	1.26245	1.25042	1.33953	1.30073	1.24236	1.21063	1.25756	1.20822	1.20869	1.16243	1.22501	1.15531	1.26908	1.24426	1.25201	1.09998	1.24727	1.18978	1.22945	1.24982	1.33899	1.27916	1.21845	1.26285	1.29243	1.38109	1.40169	1.40694	1.4084	0.862106	0.789018	0.824078	0.895161	0.819248	0.709821
295	1.4089	1.35455	1.27996	1.21143	1.25783	1.28765	1.33468	1.24803	1.27535	1.30772	1.26985	1.26248	1.35635	1.39783	1.35731	1.36841	1.31547	1.33695	1.40343	1.38696	1.4043	1.47067	1.49338	1.43248	1.38241	1.53442	1.41569	1.47747	1.40727	1.3358	1.22351	1.35748	1.27889	1.21629	1.3255	1.3766	1.26713	1.29253	1.33538	1.39143	1.16499	1.23069	1.40548	1.3278	1.33926	1.30968	0.819108	0.7478	0.841779
296	1.05301	1.20382	1.13014	1.1445	1.05673	1.04054	0.984595	0.9341	1.00702	0.954118	1.07976	1.13601	1.13832	1.15978	1.21582	1.13068	0.976595	1.05934	1.17206	1.06403	1.07602	1.10458	1.23699	1.26825	1.15904	1.1102	1.02693	1.2073	1.22216	1.18884	1.2454	1.27943	1.24347	1.34194	1.2636	1.39558	1.2674	1.34842	1.23855	1.23298	1.25013	1.20568	1.21863	1.21498	1.19653	1.38729	1.27428	1.36309	1.32573
297	1.20722	1.24091	1.14867	1.05587	1.10808	1.16624	1.19202	1.14817	1.1019	1.04023	1.15663	1.17446	1.1488	1.18892	1.17209	1.16702	1.22012	1.24481	1.12912	1.07143	1.13545	1.03897	1.00089	1.12049	0.943634	1.307	1.33423	1.31952	1.38045	1.20884	1.11455	1.27307	1.25021	1.29503	1.32917	1.38142	1.09938	1.20012	1.29988	1.44146	1.34631	0.437327	0.474187	0.497689	0.641369	0.657426	0.560861	0.587546	0.516766
298	0.972373	0.975048	0.997023	1.05323	1.06608	1.09843	1.09429	1.18127	1.17531	1.17327	1.09825	1.18775	1.1411	1.18036	1.29863	1.26036	1.20765	1.25436	1.30156	1.27023	1.33431	1.23104	1.24509	1.22907	1.29137	1.21249	1.1703	1.20761	1.2411	1.31232	1.20895	1.10271	1.09878	1.12139	1.13051	1.14436	1.31882	1.35812	1.3084	1.32408	1.2073	1.37908	1.4483	1.445	1.32305	1.35425	1.29273	1.25817	1.17992
299	0.769507	0.799926	0.812996	1.01484	1.23497	1.26706	1.24645	1.2764	1.32644	1.27538	1.25577	1.20021	1.27565	1.3415	1.37147	1.32743	1.31403	1.30437	1.29931	1.37277	1.39165	1.31006	1.36519	1.32086	1.23023	1.19035	1.18428	1.22358	1.23532	1.22601	1.35128	1.3471	1.40603	1.40192	1.36519	1.39918	1.35611	1.44024	1.3825	1.317	1.32901	1.23928	1.16359	1.07431	1.09118	1.15258	1.08196	1.09628	1.12039
300	0.97678	0.971075	1.00415	1.034	1.04491	1.10555	1.15333	1.20419	1.1887	1.19102	1.1854	1.20094	1.16723	1.17272	1.19637	1.20704	1.19366	1.16983	1.25233	1.17732	1.20609	1.28013	1.28823	1.26733	1.34374	1.26436	1.20951	1.1885	1.24714	1.23194	1.28656	1.33791	1.25149	1.32611	1.29097	1.3811	1.38235	1.31634	1.24106	1.28916	1.24777	1.27255	1.27873	1.23019	1.2999	1.34199	1.42284	1.21665	1.33711
301	1.07913	1.1977	1.25423	1.31864	1.29095	1.26275	1.29679	1.32022	1.31188	1.29373	1.31247	1.53929	1.49627	1.54571	1.5589	1.57363	1.60108	1.57478	1.63015	1.59569	1.5882	1.52434	1.49479	1.43469	1.49283	1.01766	1.3776	1.49671	1.50696	1.50191	1.49334	1.64175	1.54951	1.50884	1.29186	1.3106	1.38876	1.34173	1.38327	1.375	1.27419	1.26398	1.32277	1.30204	1.3626	1.3498	1.38277	1.34822	1.42633
302	1.23091	1.13047	1.16904	1.20996	1.20546	1.28056	1.33647	1.34086	1.35666	1.38242	1.40406	1.35061	1.38707	1.41413	1.36301	1.41638	1.41628	1.49422	1.57284	1.55606	1.47747	1.40647	1.38305	1.37819	1.39131	1.37099	1.42817	1.52681	1.54816	1.64005	1.67999	1.68839	1.71128	1.69619	1.70644	1.73856	1.64685	1.65626	1.65334	1.69723	1.57056	1.59356	1.55792	1.64777	1.62176	1.68316	1.63583	1.60051	1.65735
303	0.86365	0.905008	0.911552	0.942713	0.929154	1.1108	0.941373	0.991099	0.952869	0.869957	1.02658	1.0019	1.18402	1.27406	1.10665	1.06658	1.09129	1.14494	1.16195	1.22082	1.0897	1.02859	1.00508	1.08033	1.14046	1.087	1.12529	1.05178	1.07634	0.972137	1.03411	1.20328	1.17471	1.17294	1.12156	1.08711	1.23455	1.24109	1.28283	1.31375	1.37668	1.35039	1.21849	1.13276	1.22313	1.23365	1.36626	1.15934	1.35168
304	1.13151	1.16554	1.19665	1.19249	1.26781	1.27881	1.25322	1.20955	1.16188	1.19804	1.14434	1.24618	1.33529	1.35628	1.43577	1.39114	1.37321	1.38021	1.30718	1.34658	1.37383	1.3552	1.35185	1.33237	1.37648	1.39478	1.35473	1.20188	1.16582	1.1735	1.1651	1.18318	1.08666	1.24451	1.30643	1.37062	1.29985	1.31352	1.10693	1.1549	1.2547	1.32472	1.30377	1.27942	1.27763	1.3232	1.42096	1.43632	1.398
305	1.19399	1.30939	1.23931	1.21034	1.23071	1.24998	1.2763	1.27391	1.26873	1.28624	1.25734	1.27837	1.21024	1.30343	1.27289	1.19808	1.16923	1.24588	1.25869	1.37958	1.24651	1.34925	1.35088	1.3852	1.37897	1.30312	1.33057	1.22106	1.20107	1.24156	0.47884	0.399808	0.485722	0.736896	0.688048	0.572112	0.57936	0.544452	0.542048	0.536393	0.535496	0.525447	0.562862	0.604826	0.668027	0.694752	0.721053	0.766219	0.78199
306	1.38799	1.48175	1.55625	1.5408	1.5063	1.42009	1.32565	1.28448	1.27321	1.28715	1.31926	1.33679	1.3074	1.28796	1.28094	1.29122	1.25449	1.33619	1.29829	1.33345	1.42334	1.42254	1.42722	1.39451	1.43663	1.3219	1.25112	1.25881	1.32277	1.24389	1.23011	1.35286	1.25978	1.4385	1.40478	1.31796	1.43206	1.50085	1.2949	0.478738	0.529596	0.488797		0.461561	0.639736	0.50617	0.576979	0.546818	0.553674
307	1.11957	1.17515	1.20329	1.26283	1.34216	1.33375	1.32638	1.33295	1.37281	1.37455	1.32163	1.21824	1.18164	1.19869	1.24673	1.31356	1.2608	1.34369	1.34921	1.28006	1.22032	1.36446	1.43038	1.44183	1.50606	1.44199	1.49158	1.45308	1.42205	1.49534	1.40494	1.43975	1.49288	1.5011	1.5415	1.52014	1.56623	1.53681	1.48543	1.49564	1.4145	1.23113	1.2658	1.31883	1.45521	1.50541	1.41095	1.32942	1.24051
308	0.919811	1.04108	1.08054	0.964161	1.02068	1.06585	1.07773	1.14328	1.16569	1.10023	1.12511	1.16873	1.12968	1.20517	1.28766	1.3093	1.16064	1.20242	1.18876	1.10857	1.02576	1.04863	1.04996	1.00204	1.02489	1.23371	1.27369	1.18694	1.31906	1.33587	1.19959	1.15554	1.25264	1.18121	1.2507	1.34708	1.21629	1.32632	1.15913	1.17039	1.3083	1.36311	1.03828	0.972792	1.00724	1.12175	1.13367	0.896716	0.654745
309	0.799799	0.95222	0.820218	0.837243	0.751255	0.787447	0.850669	0.890748	0.923332	0.881395	1.00622	1.04327	1.1381	1.16795	1.15877	1.16636	1.194	1.22546	1.23597	1.20322	1.32376	1.28341	1.30196	1.37137	1.37607	1.35957	1.39835	1.4271	1.40375	1.3489	1.27466	1.25953	1.35608	1.37614	1.34418	1.40238	1.48244	1.47227	1.40406	1.38602	1.38162	1.4485	1.4949	1.49441	1.54775	0.498035	0.382841	0.468278	0.737209
310	1.36117	1.41523	1.42275	1.38899	1.40227	1.39079	1.43714	1.50858	1.50942	1.47497	1.48895	1.45469	1.45195	1.38374	1.39369	1.41187	1.41423	1.40341	1.3353	1.37278	1.28527	1.28007	1.18868	1.19741	1.1897	1.38398	1.4779	1.55522	1.38136	1.26634	1.33319	1.47439	1.47057	1.37095	1.41371	1.43314	1.44754	1.37385	1.38595	1.38067	1.42874	1.37086	1.52472	0.690426	0.590755	0.540939	0.635072	0.778088	0.711249
311	1.14278	1.22393	1.24017	1.19914	1.11106	1.15789	1.08776	1.14479	1.17026	1.16485	1.14756	1.1318	1.07631	1.11724	1.12972	1.09552	1.18657	1.15577	1.18296	1.18505	1.19321	1.2095	1.19201	1.22083	1.12818	1.18182	1.18675	1.22492	1.22448	1.3035	1.40996	1.34648	1.38435	1.40564	1.34029	1.2997	1.39958	1.30233	1.3288	1.41656	1.39488	1.38297	1.39686	1.30072	1.29208	1.24209	1.34281	1.41301	1.39135
312	0.978741	1.05111	1.05507	1.01381	1.05024	1.08168	1.12382	1.1131	1.12167	1.16511	1.16789	1.13238	1.1182	1.08873	1.13525	1.05617	1.20548	1.16122	1.23705	1.34305	1.32577	1.30773	1.33877	1.36246	1.33546	1.26362	1.24832	1.26102	1.16949	1.40723	1.40011	1.30937	1.32258	1.1726	1.25202	1.18387	1.27512	1.2762	1.21609	1.27455	1.19513	1.2298	1.22974	1.39994	1.26009	1.30896	1.34781	1.12122	1.42871
313	1.16146	1.19252	1.24086	1.24432	1.29093	1.25355	1.26577	1.31956	1.28889	1.26129	1.21137	1.26164	1.24983	1.28747	1.23704	1.27953	1.2147	1.20337	1.27708	1.28824	1.31224	1.22779	1.27847	1.23202	1.29715	1.29166	1.30306	1.37518	1.54134	1.53746	1.54735	1.47706	1.35222	1.43477	1.42844	1.26487	1.35048	1.4263	1.67403	1.729	1.49028	1.45908	1.41495	1.42707	1.61175	1.70249	1.73034	1.74777	1.75474
314	0.97173	1.02161	1.05647	1.05979	1.06989	1.1083	1.12242	1.15291	1.13039	1.16685	1.13323	1.16572	1.22026	1.22197	1.15512	1.19576	1.2089	1.26272	1.21194	1.23789	1.30654	1.27255	1.1883	1.28449	1.22944	1.16521	1.28521	1.15791	1.28112	1.40382	1.36226	1.3306	1.32557	1.4144	1.30399	1.4029	1.325	1.1938	1.44053	1.58544	1.54604	1.30573	1.5006	1.55714	1.56747	1.5447	1.59857	1.59788	1.52292
315	1.39691	1.36308	1.42467	1.49206	1.50318	1.47225	1.44256	1.48624	1.54044	1.58557	1.57606	1.63874	1.67739	1.69206	1.77653	1.67829	1.69674	1.66125	1.63489	1.71371	1.60524	1.66427	1.60302	1.63824	1.70438	1.73317	1.89884	1.99482	1.9875	1.99488	1.81786	1.38443	1.45133	0.787219	0.817927	0.924288	0.83018	0.757773	0.635535	0.561905	0.516189	0.531161	0.510794	0.524602	0.471412	0.491681	0.526004	0.526788	0.482107
316	1.22168	1.23099	1.22898	1.2975	1.32143	1.29906	1.31994	1.33453	1.39508	1.42945	1.55722	1.56693	1.56732	1.62106	1.67594	1.68475	1.71735	1.59905	1.52289	1.47406	1.53506	1.51795	1.31425	1.33001	1.39397	1.32007	1.35308	1.31631	1.20041	1.28807	1.30206	1.3638	1.44855	1.46027	1.55559	1.37732	1.36265	1.41668	1.45253	1.3519	1.25863	1.25423	1.24997	1.42691	1.44581	1.30216	1.26361	1.43331	1.43319
317	1.18161	1.28687	1.29	1.2507	1.2523	1.29521	1.31926	1.34752	1.25827	1.38678	1.46258	1.46985	1.44424	1.36111	1.37213	1.40065	1.39913	1.38226	1.39054	1.3738	1.36962	1.43035	1.45134	1.48063	1.50193	1.48583	1.44571	1.43144	1.45717	1.4445	1.45594	1.38346	1.37359	1.4814	1.50108	1.60942	1.64459	1.53146	1.5282	1.49991	1.42221	1.48001	1.44861	1.37199	1.32024	1.31044	1.42491	1.44216	1.40154
318	0.473225	0.483107	0.457101	0.458831	0.448602	0.441641	0.448363	0.450638	0.423749	0.411622	0.409072	0.419886	0.413	0.415608	0.433156	0.430184	0.427647	0.41756	0.44054	0.436087	0.467756	0.482814	0.507039	0.512915	0.488192	0.501956	0.494768	0.462931	0.447612	0.431305	0.420748	0.393685	0.414146	0.403236	0.415688	0.443402	0.438886	0.438034	0.431287	0.442442	1.6647	1.6146	1.56659	1.56324	1.6195	1.58388	1.65882	1.72725	1.65183
319	0.473225	0.483107	0.457101	0.458831	0.448602	0.441641	0.448363	0.450638	0.423749	0.411622	0.409072	0.419886	0.413	0.415608	0.433156	0.430184	0.427647	0.41756	0.44054	0.436087	0.467756	0.482814	0.507039	0.512915	0.488192	0.501956	0.494768	0.462931	0.447612	0.431305	0.420748	0.393685	0.414146	0.403236	0.415688	0.443402	0.438886	0.438034	0.431287	0.442442	1.6647	1.6146	1.56659	1.56324	1.6195	1.58388	1.65882	1.72725	1.65183
320	1.14278	1.22393	1.24017	1.19914	1.11106	1.15789	1.08776	1.14479	1.17026	1.16485	1.14756	1.1318	1.07631	1.11724	1.12972	1.09552	1.18657	1.15577	1.18296	1.18505	1.19321	1.2095	1.19201	1.22083	1.12818	1.18182	1.18675	1.22492	1.22448	1.3035	1.40996	1.34648	1.38435	1.40564	1.34029	1.2997	1.39958	1.30233	1.3288	1.41656	1.39488	1.38297	1.39686	1.30072	1.29208	1.24209	1.34281	1.41301	1.39135
321	1.06021	1.07806	1.11569	1.13155	1.23438	1.28601	1.35798	1.46189	1.45636	1.42949	1.42053	1.41383	1.4695	1.44315	1.46297	1.36575	1.34036	1.35877	1.37464	1.39551	1.42631	1.4287	1.43394	1.39974	1.36942	1.40305	1.40486	1.44495	1.41905	1.328	1.32237	1.43691	1.46927	1.42444	1.43671	1.48611	1.45733	1.35805	1.32464	1.35323	1.43522	1.56483	1.6569	1.57616	1.55562	1.53819	1.51429	1.50196	1.4593
[truncated: 111 more columns]
