# Supplementary material for: Single cell analysis reveals multiple requirements for zinc in the mammalian cell cycle
Source: eLife. 2020 Feb 4;9:e51107. doi: 10.7554/eLife.51107 (PMC7000218; doi:10.7554/eLife.51107)
Supplement: Figure 5—source data 1. [file elife-51107-fig5-data1.xlsx]

## Sheet: README
Source data for Figure 5 - ZD induces DNA damage
Each tab is a table that was exported from a MATLAB structure used to house the data.
Note that the ID assigned to a cell ('CellIndx') are 1) assigned on a per well basis; and 2) not necessarily sequential. This is due to area & morphology filtering that was applied to exclude cells at the edge of the field of view.
Additionally, for Rep 1, we did not originally include the Well ID (i.e. 'E03', 'B02') in the filename. These were therefore assigned placeholder 'ParentWell' names ('WellA', 'WellB'). We verified that these were grouped appropriately

## Sheet: 53BP1_MM_Rep1.csv
ParentWell	CellIndx	NuclearArea	MeanNuclearIntensity	Centroid_1	Centroid_2	IntNuclearIntensity	pRBIntensity	NumPuncta
								0
WellR	1	12670	246.428	38.6984	1190.92	1661610	131.145	1
WellR	3	6859	203.834	36.3034	1765.47	2255971	328.907	2
WellR	4	8784	249.442	49.7058	747.501	3248545	369.825	0
WellR	5	8618	268.14	79.3627	2005.02	2698065	313.073	1
WellR	6	23213	297.285	192.639	1871.17	7511323	323.583	1
WellR	7	10011	288.265	310.086	418.799	3449222	344.543	0
WellR	8	11023	291.107	326.886	1994.77	3626832	329.024	1
WellR	9	10489	306.134	324.576	1831.61	3325052	317.004	2
WellR	10	10567	289.639	493.613	1616.93	3533558	334.396	0
WellR	11	9572	274.538	605.264	51.5291	3880134	405.363	0
WellR	12	10544	228.975	646.458	1728.89	3375355	320.121	1
WellR	13	9092	260.287	685.691	1381.27	3666617	403.279	2
WellR	14	10622	214.512	737.413	101.918	5056399	476.031	0
WellR	15	8222	240.413	824.595	1552.48	3206093	389.941	2
WellR	16	9461	277.905	902.999	249.995	5365826	567.152	3
WellR	17	10663	217.982	933.668	109.897	5264172	493.686	3
WellR	18	11128	311.388	1017.44	1146.73	5365509	482.163	0
WellR	19	10674	400.1	1133.98	649.717	5690444	533.113	1
WellR	20	12447	231.588	1215.71	864.798	4682122	376.165	2
WellR	21	11511	381.033	1290.17	518.811	6677140	580.066	0
WellR	22	6580	306.605	1294.82	288.734	3257778	495.103	1
WellR	23	8881	268.612	1307.77	970.494	3232422	363.97	0
WellR	24	11162	339.198	1379.78	1155	5470141	490.068	1
WellR	25	6714	274.901	1385.27	159.269	2582912	384.705	2
WellR	26	19513	285.644	1445.38	763.804	12318800	631.312	2
WellR	27	10253	234.773	1445.92	49.0229	5549688	541.275	2
WellR	28	8687	283.913	1431.34	927.026	3564238	410.296	1
WellR	29	8750	273.904	1457.45	514.588	3841775	439.06	0
WellR	30	8435	284.284	1538.74	604.961	3537051	419.33	1
WellR	31	12829	217.99	1602.22	988.128	1928507	150.324	2
WellR	33	11404	321.91	1639.38	1544.61	4483141	393.12	3
WellR	34	10916	361.968	1682.69	547.597	5400762	494.757	0
WellR	36	13084	340.018	1726.27	776.417	6656049	508.717	2
WellR	37	12001	231.2	1734.33	944.553	2070952	172.565	3
WellR	38	10272	298.771	1776.59	1318.36	5659770	550.99	4
WellR	39	9838	406.643	1844.03	715.721	7867130	799.668	0
WellR	40	11656	301.752	1853.53	444.553	5037158	432.152	1
WellR	41	13547	268.957	1903.09	562.741	5398680	398.515	2
WellR	42	11313	296.261	1902.34	1119.04	6649377	587.764	0
WellR	43	7415	243.4	1901.61	218.157	3119328	420.678	0
WellR	44	12771	311.44	1981.81	966.78	5957873	466.516	3
WellR	45	10818	210.388	1984.95	415.242	4357021	402.757	0
WellR	46	7929	307.497	2009.67	1380.91	3552548	448.045	0
WellR	2	9057	300.318	47.8255	777.818	3957029	436.903	1
WellR	3	7104	256.918	45.0709	996.274	2709920	381.464	1
WellR	4	5116	267.412	20.9558	1188.59	1595392	311.844	1
WellR	5	5788	215.176	24.9252	1417.6	1827025	315.657	0
WellR	6	23057	329.881	138.635	872.96	8318987	360.801	0
WellR	8	13092	238.777	97.7799	1510.04	4152568	317.184	5
WellR	9	10789	227.621	106.356	1128.27	3722481	345.026	2
WellR	10	10195	307.468	99.6502	1989.95	3606469	353.749	0
WellR	11	8971	244.397	103.199	252.93	2999119	334.313	1
WellR	12	11315	247.506	111.272	1316.38	3302404	291.861	2
WellR	13	10153	209.805	147.624	1842.11	3502238	344.946	0
WellR	14	12087	282.794	193.859	610.281	5396122	446.44	0
WellR	15	8807	271.449	204.436	1073	3480066	395.148	2
WellR	16	10837	198.155	208.362	1698.36	3084761	284.651	0
WellR	17	12222	238.454	214.923	1227.83	3971713	324.964	3
WellR	18	7968	281.609	251.057	741.145	3186263	399.882	0
WellR	19	6836	298.129	246.551	969.762	2019561	295.43	2
WellR	20	10187	209.42	274.849	1808.21	3143931	308.622	0
WellR	21	19729	247.91	291.029	1441.44	7528001	381.57	2
WellR	22	17746	350.778	327.582	877.436	7253980	408.767	1
WellR	23	15208	333.883	339.718	1054.57	5953379	391.464	4
WellR	24	10375	277.602	329.867	1226.55	3206485	309.059	1
WellR	25	8180	342.058	334.955	1447.21	1355238	165.677	1
WellR	26	19457	295.137	367.359	1972.73	4824761	247.97	0
WellR	27	17819	331.491	482.31	964.058	7852411	440.676	4
WellR	28	13463	211.036	465.825	1663.95	4330461	321.656	0
WellR	29	14143	237.32	488.502	1242.5	4469478	316.021	1
WellR	30	13198	270.535	485.516	1825.6	3556493	269.472	1
WellR	31	10451	296.002	509.571	1096.02	4075986	390.009	1
WellR	32	9180	358.026	523.513	403.184	4027074	438.679	2
WellR	33	5737	326.164	511.122	1959.85	1065604	185.742	0
WellR	34	12469	268.52	535.487	1524.06	3802470	304.954	1
WellR	35	9702	268.076	532.153	52.5582	3256057	335.607	1
WellR	36	12139	240.533	564.846	1383.6	4124735	339.792	1
WellR	37	8904	289.455	577.756	807	3608938	405.316	1
WellR	38	9926	271.625	620.377	1007.15	4881952	491.835	0
WellR	39	11288	221.411	619.746	1798.64	3077153	272.604	0
WellR	40	10828	253.64	662.261	1116.59	5404352	499.109	0
WellR	41	14568	217.422	681.058	1603.69	3952559	271.318	0
WellR	42	12592	290.382	722.254	1424.18	4474654	355.357	0
WellR	43	12511	307.178	727.15	1287.83	5473481	437.493	2
WellR	44	9682	258.029	739.139	620.812	4948301	511.083	1
WellR	45	13209	269.342	745.455	1875.81	4150246	314.198	3
WellR	47	11558	203.009	901.858	1597.95	3425000	296.332	2
WellR	48	23369	224.512	923.911	1764.72	6228087	266.511	0
WellR	49	10999	219.333	936.842	1100.87	4399685	400.008	3
WellR	50	14463	219.282	956.404	1403.32	4479628	309.73	2
WellR	52	12663	215.854	1063.83	1957.23	3875415	306.042	3
WellR	53	13423	209.54	1118.94	1557.02	4381722	326.434	0
WellR	54	12000	414.162	1118.6	403.2	6610501	550.875	2
WellR	55	11733	224.311	1148.8	1410.27	4536978	386.685	2
WellR	56	10280	218.838	1143.92	1194.52	4581974	445.717	5
WellR	57	22208	218.377	1162.5	1732.56	6779170	305.258	3
WellR	58	8218	306.378	1164.41	692.742	5006346	609.193	2
WellR	60	11010	315.394	1259.84	912.291	5609804	509.519	4
WellR	61	8423	298.509	1266.18	426.66	4799325	569.788	0
WellR	62	10798	224.04	1271.18	1697.76	4509292	417.604	3
WellR	63	12560	199.052	1307.97	1499.77	1739373	138.485	0
WellR	64	12359	341.129	1338.69	226.476	6808750	550.914	1
WellR	65	12248	213.947	1355.93	1322.02	4125585	336.837	3
WellR	66	11061	211.515	1386.02	1702.97	3886450	351.365	3
WellR	67	9959	242.595	1392.67	1074.88	5058819	507.965	5
WellR	68	10802	327.061	1463.67	805.185	5558027	514.537	1
WellR	69	9202	230.464	1454.96	1462.3	1269769	137.988	2
WellR	70	8006	286.07	1480.18	305.122	4487318	560.494	2
WellR	71	10845	225.458	1493.22	1279.93	2096299	193.296	1
WellR	72	13811	289.248	1521.51	1924.38	5568945	403.225	1
WellR	74	8823	260.065	1603.18	980.162	4085628	463.066	3
WellR	75	11005	221.663	1609.63	1334.42	4083114	371.024	1
WellR	76	12133	214.834	1640.24	1515.83	3430664	282.755	2
WellR	77	9586	319.428	1671.35	2005.17	3953538	412.428	1
WellR	78	13497	227.945	1717.69	1727.85	4484517	332.26	1
WellR	79	9911	235.35	1811.93	1558.72	3711893	374.523	2
WellR	80	9625	241.907	1819.55	1361.17	4184613	434.765	1
WellR	81	12257	239.615	1890.4	1010.45	6954354	567.378	0
WellR	82	9387	250.238	1891.49	1176.91	4443750	473.394	1
WellR	83	9009	245.446	1888.51	683.326	4761206	528.494	1
WellR	84	10359	239.744	1965.98	1358.99	4062706	392.191	1
WellR	85	7458	284.484	1964.94	1845.09	3825623	512.956	0
WellR	86	7943	263.606	1983.77	1613.28	4918874	619.272	1
WellR	1	5075	284.893	49.6396	2018.81	2244166	442.2	0
WellR	3	12049	279.294	238.129	203.327	4399378	365.124	0
WellR	4	14176	324.844	307.326	1981.77	5435388	383.422	0
WellR	5	9344	221.087	304.301	523.983	3122615	334.184	1
WellR	6	7530	251.529	338.946	40.9193	2164343	287.429	0
WellR	7	10073	221.595	379.811	387.962	3597748	357.167	0
WellR	8	11279	240.392	384.654	1689.05	3578703	317.289	0
WellR	9	11528	283.945	399.138	130.255	3464580	300.536	1
WellR	10	10936	316.776	459.828	301.341	3836810	350.842	1
WellR	11	8927	240.764	553.988	580.539	3178891	356.098	0
WellR	13	11192	275.922	587.951	1395.1	4724299	422.114	1
WellR	14	11726	227.58	611.569	842.895	4299109	366.63	2
WellR	15	11689	265.592	677.391	1892.02	3366277	287.987	1
WellR	16	9761	243.858	784.831	683.039	4378711	448.592	1
WellR	17	7890	243.442	774.702	71.5638	1392223	176.454	0
WellR	18	16072	291.804	835.74	459.686	7698776	479.018	3
WellR	20	10914	225.754	921.798	174.677	4608874	422.29	0
WellR	21	10700	289.188	919.198	1045.27	4557018	425.89	0
WellR	22	9843	257.954	945.055	353.174	4292814	436.129	1
WellR	23	18311	235.956	1018.64	86.4259	6365568	347.636	0
WellR	24	9421	268.711	1036.54	621.888	4731379	502.216	0
WellR	25	10455	260.457	1040.57	399.423	4263821	407.826	0
WellR	26	10154	246.807	1071.04	232.273	3453400	340.102	0
WellR	27	8834	282.231	1138.34	465.573	3977880	450.292	0
WellR	28	12268	224.395	1172.97	278.022	4203918	342.673	1
WellR	29	12691	210.211	1180.48	70.4151	4503656	354.87	2
WellR	30	12480	358.973	1261	832.902	7343451	588.418	2
WellR	31	11209	212.792	1290.41	117.692	3939677	351.474	0
WellR	1	5119	260.225	53.85	28.3903	2050603	400.587	0
WellR	2	6943	279.247	26.2558	423.773	3257120	469.123	2
WellR	4	7203	281.777	29.0773	1421.08	1030997	143.134	0
WellR	5	9032	211.182	48.5543	1899.77	3021858	334.572	0
WellR	6	12796	247.697	74.3512	1623.54	4310642	336.874	1
WellR	7	9528	200.205	114.446	161.502	1995883	209.476	0
WellR	8	17734	242.615	136.467	685.827	6623457	373.489	2
WellR	9	8962	220.006	129.902	1858.26	2357560	263.062	0
WellR	10	23065	269.727	218.429	1682.07	7431905	322.216	3
WellR	11	20673	236.293	275.806	622.492	8091461	391.402	6
WellR	12	12422	258.312	265.043	1898.61	4515529	363.511	4
WellR	13	13192	274.05	300.103	178.596	4960761	376.043	2
WellR	14	12484	299.692	313.893	862.706	6154522	492.993	1
WellR	15	10835	212.922	316.336	1117.47	3855884	355.873	4
WellR	16	14037	262.082	365.154	1537.95	4535713	323.126	1
WellR	18	12234	309.857	359.598	279.8	4443322	363.195	0
WellR	19	16097	266.487	392.045	531.293	2439588	151.555	2
WellR	20	11875	323.275	395.622	988.851	5231289	440.53	1
WellR	21	11452	335.492	412.477	758.333	4472884	390.577	2
WellR	22	21566	264.892	427.533	1258.99	5198004	241.028	4
WellR	23	36386	294.269	549.45	324.882	11516298	316.504	2
WellR	24	10742	327.735	467.198	868.488	3607264	335.809	1
WellR	25	13854	310.434	490.869	649.462	6711795	484.466	0
WellR	26	14228	262.891	506.985	120.622	5377860	377.977	0
WellR	27	9314	253.906	509.795	1030.5	4330960	464.995	0
WellR	28	8486	259.241	549.339	504.667	3104454	365.832	1
WellR	30	10709	219.664	646.129	76.6546	3846353	359.17	1
WellR	31	10812	232.091	654.572	1122.57	4210060	389.388	2
WellR	32	9798	236.101	739.362	188.322	4074240	415.824	0
WellR	33	22547	272.186	808.101	1155.37	3504806	155.444	0
WellR	34	9639	259.139	829.601	969.628	4045151	419.665	0
WellR	35	9560	256.819	889.528	1277.95	1293324	135.285	2
WellR	36	9972	267.718	885.634	855.031	4290657	430.27	0
WellR	37	19820	340.37	945.778	673.089	11504280	580.438	2
WellR	38	20266	260.625	982.719	980.063	8929178	440.599	0
WellR	2	5530	205.646	29.0656	687.625	1528899	276.474	0
WellR	3	5438	268.262	26.7527	1372.58	1837960	337.985	1
WellR	4	14505	242.508	59.3867	866.093	4403765	303.603	2
WellR	5	8436	213.556	78.5187	341.506	2568283	304.443	0
WellR	6	11304	193.614	93.9735	558.971	3023984	267.515	0
WellR	7	11659	274.936	108.86	1055.48	3399600	291.586	4
WellR	8	15498	293.999	176.836	110.257	7187000	463.737	0
WellR	9	11722	198.938	157.203	740.345	3320254	283.25	0
WellR	10	16483	241.383	227.276	348.233	5527065	335.319	0
WellR	12	13731	271.578	236.672	1004.84	5307266	386.517	3
WellR	14	14135	277.573	309.054	581.824	5651109	399.795	0
WellR	15	10731	213.927	254.605	862.666	3555810	331.359	0
WellR	16	12647	263.42	310.463	153.056	3577098	282.842	3
WellR	17	10198	211.725	322.688	1152.67	3832780	375.836	0
WellR	18	19953	234.733	377.059	447.23	7332827	367.505	1
WellR	19	12003	301.526	381.016	283.097	5082609	423.445	2
WellR	20	10630	220.08	376.436	836.851	3937251	370.39	0
WellR	21	11219	215.848	396.614	690.524	4041695	360.254	0
WellR	22	9754	337.059	399.32	1986.67	4105705	420.925	0
WellR	24	7585	256.973	680.775	1726.3	4162755	548.814	0
WellR	25	9980	338.434	783.939	1378.99	4914650	492.45	0
WellR	26	9685	391.085	834.092	1985.23	5885776	607.721	0
WellR	27	11264	335.732	827.374	1166.5	5970504	530.052	1
WellR	28	16321	275.178	834.832	1630.57	6092774	373.309	8
WellR	29	10579	227.399	937.774	1320	1535238	145.121	0
WellR	30	11645	318.214	963.726	1472.71	5207554	447.192	0
WellR	31	7611	290.377	981.792	1045.64	3752078	492.981	0
WellR	32	11078	230.373	1014.8	1216.62	1596952	144.155	0
WellR	33	7500	299.803	1099.06	1029.8	4207900	561.053	1
WellR	35	9485	385.867	1121.71	1350.38	4783558	504.329	0
WellR	36	9868	390.015	1191.19	1155.36	5088988	515.706	0
WellR	37	7671	261.102	1453.39	1289.77	2994884	390.416	1
WellR	38	7728	265.724	1599.64	1960.22	3193028	413.177	2
WellR	39	8573	260.861	1778.18	1257.2	3744892	436.824	1
WellR	41	6222	213.993	2017.46	288.14	2267862	364.491	1
WellR	1	5707	247.509	42.8717	285.038	2159512	378.397	0
WellR	2	9421	274.625	54.3565	1092.63	3128022	332.027	0
WellR	3	6159	245.11	34.1747	1294.19	1857341	301.565	1
WellR	4	8842	221.711	50.9412	1414.52	1355179	153.266	1
WellR	5	8073	240.738	101.964	1234.99	1408973	174.529	3
WellR	6	10661	218.247	168.806	1422.53	3450274	323.635	1
WellR	7	8520	225.062	171.76	785.985	3667116	430.413	0
WellR	8	9338	229.365	168.393	1163.86	2945753	315.459	3
WellR	9	9673	232.575	225.908	1309.7	3333950	344.666	1
WellR	10	9180	314.602	311.57	1173.07	4156987	452.831	0
WellR	11	9560	224.54	535.272	399.752	3356548	351.103	2
WellR	12	10073	322.237	569.749	132.424	4747962	471.355	0
WellR	14	5990	432.38	1317.59	519.043	6471980	1080.46	0
WellR	15	5277	429.014	1335.58	441.384	5564806	1054.54	0
WellR	16	9023	255.119	1454.44	323.276	1316316	145.885	4
WellR	17	8921	275.763	1494.58	597.375	1525056	170.951	1
WellR	19	11425	360.762	1666.43	782.434	5742771	502.65	1
WellR	20	10282	329.401	1677.34	175.801	5465841	531.593	0
WellR	21	13062	303.551	1706.99	1491.27	5576453	426.922	1
WellR	22	7358	283.561	1737.34	1950.89	3119844	424.007	0
WellR	24	14418	308.605	1819.22	813.094	8487486	588.673	0
WellR	25	6605	229.58	1848.05	48.974	2333758	353.332	2
WellR	26	18066	319.783	1912.38	1967.42	6523809	361.11	0
WellR	27	12527	314.078	1883.52	1704.54	5772807	460.829	0
WellR	28	9511	378.217	2003.49	955.056	5096299	535.832	1
WellR	29	6751	279.439	2003.1	1831.23	2292085	339.518	0
WellR	1	5412	267.882	763.233	2013.47	2010178	371.43	0
WellR	2	14660	260.122	1050.89	1643.77	6477100	441.821	0
WellR	3	11139	322.078	1069.58	1452.07	4639326	416.494	0
WellR	4	13109	285.569	1107.82	1869.18	5610475	427.986	0
WellR	5	14781	251.46	1200	1597.03	4448331	300.949	2
WellR	6	6758	338.732	1219.2	2012.85	2722060	402.791	0
WellR	7	15163	267.728	1333.31	1808.25	4336486	285.991	1
WellR	8	11711	216.425	1340.55	172.849	1611964	137.645	2
WellR	9	9747	255.543	1353.84	1988.08	2778857	285.099	4
WellR	10	18855	262.441	1436.49	322.13	2641725	140.107	4
WellR	11	11679	307.54	1427.72	1477.93	6150098	526.595	0
WellR	12	10234	277.582	1436.27	1932.48	4076048	398.285	7
WellR	13	10842	209.78	1453.68	63.259	3385947	312.299	0
WellR	14	26473	312.895	1545.6	1908.99	11761325	444.276	0
WellR	15	16975	458.793	1546.86	1714.28	10708689	630.851	0
WellR	16	10931	222.417	1564.25	168.44	3635347	332.572	0
WellR	17	14096	225.033	1606.08	55.1761	4580265	324.934	0
WellR	18	8770	256.216	1633.32	1169.66	3843293	438.232	2
WellR	19	12128	325.913	1719.26	496.808	4695348	387.149	1
WellR	20	8007	256.205	1708.12	1656.39	1134287	141.662	5
WellR	21	15870	259.149	1763.15	223.458	5120953	322.681	0
WellR	23	8371	266.753	1760.4	1098.02	3831593	457.722	0
WellR	24	10117	243.495	1771.75	357.321	1536158	151.839	1
WellR	26	9518	237.893	1839.45	1303.58	3386185	355.766	2
WellR	27	12208	279.348	1855.48	99.3653	4935623	404.294	1
WellR	28	9170	229.465	1985.22	189.906	3602491	392.856	0
WellR	29	5116	357.233	1974.5	447.839	4012147	784.235	0
WellR	30	8836	255.43	2002.93	98.1503	3189919	361.014	1
WellR	31	7711	245.18	2004.57	1304.49	1120400	145.299	2
WellR	3	9482	226.865	253.163	1942.09	3132310	330.343	0
WellR	4	18419	249.291	336.485	1203.96	6355291	345.04	0
WellR	5	9709	312.939	375.437	998.103	4672442	481.249	1
WellR	6	11235	227.903	445.059	1443.62	4161382	370.394	1
WellR	7	8525	258.925	476.438	661.786	1248085	146.403	0
WellR	8	9581	242.826	485.884	1173.33	4812314	502.277	0
WellR	9	18031	290.399	734.613	145.258	6825540	378.545	0
WellR	10	12845	320.625	754.926	337.798	4854129	377.9	1
WellR	12	10811	281.97	797.335	1900.2	4519329	418.031	1
WellR	13	14140	302.388	844.089	247.829	5313203	375.757	3
WellR	14	10920	354.553	941.894	436.76	4479316	410.194	1
WellR	15	9580	207.822	965.57	1600.38	2274696	237.442	0
WellR	16	13126	325.391	977.418	306.595	4932572	375.786	2
WellR	18	16282	465.019	1212.19	195.923	10394451	638.401	0
WellR	21	20256	410.992	1455.69	265.454	13980528	690.192	0
WellR	22	8498	267.251	1518.41	945.84	2655908	312.533	1
WellR	23	26231	291.429	1566.06	142.169	11013567	419.868	0
WellR	24	8440	305.258	1559.73	468.699	5039161	597.057	0
WellR	25	7489	316.373	1630.21	401.651	2077489	277.405	0
WellR	26	8710	304.009	1642.14	570.158	4301828	493.895	0
WellR	27	36610	318.54	1778.17	447.82	18197348	497.059	0
WellR	28	11728	430.652	1713.13	759.047	7898460	673.47	2
WellR	29	5040	199.324	1747.14	31.6806	1475406	292.739	0
WellR	30	20896	353.849	1854.55	1987.96	2792531	133.64	3
WellR	31	12047	285.31	1866.48	1744.37	4543111	377.116	1
WellR	32	13163	300.176	1926.69	1362.31	5989671	455.038	0
WellR	33	10402	203.085	1982.06	142.376	4148741	398.841	0
WellR	2	19775	311.143	124.003	789.081	9523557	481.596	2
WellR	3	11299	228.914	107.946	502.416	3480617	308.046	0
WellR	4	11516	193.022	162.73	323.417	3591608	311.88	0
WellR	5	9694	215.731	249.089	1913.78	3503633	361.423	0
WellR	6	19510	231.987	264.147	537.28	6666035	341.673	1
WellR	7	12209	312.492	288.28	723.608	4423610	362.324	2
WellR	8	9899	204.742	333.439	213.949	3062991	309.424	0
WellR	9	10334	215.986	353.551	343.275	3446361	333.497	1
WellR	10	9157	224.006	398.111	1060.08	3553981	388.116	0
WellR	11	10075	242.268	397.293	572.553	3588786	356.207	0
WellR	12	9586	240.384	412.962	440.348	3329949	347.376	2
WellR	13	10318	240.781	452.751	676.597	3738039	362.283	0
WellR	14	8419	236.669	464.043	1981.35	3146073	373.687	0
WellR	15	11096	194.125	481.732	84.5366	3716828	334.97	0
WellR	16	24948	361.275	540.122	821.966	11861446	475.447	1
WellR	17	13548	310.697	519.414	485.031	6232109	460.002	0
WellR	18	11463	365.765	559.021	957.133	6138218	535.481	0
WellR	19	10898	224.447	573.994	329.691	1534938	140.846	2
WellR	20	10698	305.502	585.279	1443.87	4803861	449.043	0
WellR	21	14538	307.361	603.655	624.539	6415652	441.302	0
WellR	22	7981	238.583	627.929	135.039	1141345	143.008	1
WellR	23	8824	359.343	646.423	1933.82	4141660	469.363	0
WellR	24	10987	222.665	729.653	281.314	1479107	134.623	4
WellR	25	9815	254.809	723.711	409.005	3597223	366.503	2
WellR	26	7950	240.156	717.961	91.8299	1142705	143.736	1
WellR	27	12679	345.047	745.099	898.412	6886895	543.173	1
WellR	28	13343	342.282	769.305	670.424	6301944	472.303	1
WellR	29	14629	248.335	797.382	1734.31	4704162	321.564	0
WellR	30	9707	208.714	821.589	1531.95	2736604	281.921	0
WellR	31	10469	370.11	917.834	369.204	5834402	557.303	2
WellR	32	8439	235.972	909.747	1961.44	2957832	350.496	1
WellR	33	9184	220.602	1004	1815.16	2504723	272.727	0
WellR	35	10258	221.096	1298.81	1815.66	3260865	317.885	3
WellR	36	5120	213.019	1419.88	27.0766	2048740	400.145	1
WellR	37	8312	245.039	1421.04	1733.78	3204068	385.475	0
WellR	38	8518	237.232	1448.19	1535.54	3240634	380.445	0
WellR	39	12500	344.436	1509.81	1038.06	7788583	623.087	1
WellR	40	11146	387.806	1583.66	896.287	6684251	599.7	0
WellR	41	11711	323.264	1971.05	1482.8	5874549	501.627	0
WellR	42	10392	351.657	1972.38	1207.37	4995417	480.698	0
WellR	43	8070	361.638	2003.88	1961.64	3525358	436.847	1
WellR	2	8146	406.626	51.8332	1691.05	6711409	823.89	0
WellR	4	9835	198.134	100.269	579.34	3105753	315.786	0
WellR	5	8377	221.467	111.159	1574.73	2500012	298.438	0
WellR	6	10630	192.562	127.598	901.755	3308031	311.198	0
WellR	7	5077	275.542	141.421	72.7491	1400334	275.819	0
WellR	8	10356	191.367	156.294	1195.21	3042200	293.762	0
WellR	10	9043	208.211	225.234	388.362	3053111	337.621	0
WellR	11	8820	214.156	225.337	1518.01	2662342	301.853	0
WellR	12	5419	244.24	239.896	36.0627	1243981	229.559	0
WellR	14	9534	218.027	311.368	653.019	4166594	437.025	1
WellR	15	10423	197.758	322.989	1139.09	3340948	320.536	1
WellR	16	10103	206.75	331.496	1332.99	2939936	290.996	1
WellR	17	9321	216.778	332.52	1939.03	2347630	251.865	0
WellR	18	11017	195.856	344.789	1793.57	3188566	289.422	0
WellR	19	9640	201.331	346.78	162.449	3420343	354.807	1
WellR	20	21299	261.794	418.767	1441.44	7342940	344.755	1
WellR	21	9305	214.495	451.399	1989.37	3258187	350.154	0
WellR	22	9759	213.547	449.596	334.961	3374739	345.808	2
WellR	23	13442	261.225	486.973	1640.11	4582293	340.894	0
WellR	24	11579	193.043	504.41	1831.02	3470717	299.742	0
WellR	25	10561	208.87	511.35	1299.72	3680345	348.485	0
WellR	26	13119	279.237	565.272	1538.46	5335732	406.718	0
WellR	27	8487	222.137	676.4	1810.83	2827117	333.111	0
WellR	28	14093	269.967	718.511	1340.15	6884366	488.495	0
WellR	29	11097	312.581	782.696	91.1224	1578410	142.238	3
WellR	30	9030	223.634	962.63	62.7426	3695503	409.247	0
WellR	31	10386	223.301	1086.9	218.723	3805390	366.396	1
WellR	32	8639	218.009	1201.53	51.7912	3475527	402.307	1
WellR	33	8385	264.96	1233.95	303.846	3999505	476.983	0
WellR	34	9290	262.853	1313.69	489.911	5362736	577.259	1
WellR	35	8474	247.163	1708.41	358.275	3788102	447.026	0
WellR	4	10175	204.803	67.0566	1802.67	3495313	343.52	0
WellR	6	9680	207.738	162.068	1590.95	3761506	388.585	0
WellR	7	9210	213.909	168.392	242.746	1186570	128.835	3
WellR	9	9048	213.372	240.86	1270.64	1230704	136.019	3
WellR	10	9216	199.763	238.696	51.9013	2900029	314.673	0
WellR	11	11595	196.826	260.61	164.29	1844766	159.1	4
WellR	12	9880	221.606	347.203	382.431	1297535	131.329	1
WellR	13	11229	196.896	364.981	58.6469	3585684	319.324	0
WellR	14	9778	234.74	432.814	190.781	3614244	369.63	1
WellR	15	7907	240.512	475.902	98.6865	2449923	309.842	2
WellR	16	11887	251.739	593.729	1296.53	4894895	411.786	0
WellR	17	11825	212.797	637.938	336.816	5213496	440.888	0
WellR	18	12331	285.219	651.784	1925.98	4062394	329.446	2
WellR	1	11298	201.857	61.053	321.41	3699321	327.431	2
WellR	2	8965	340.987	44.1001	729.27	4047731	451.504	0
WellR	3	13239	184.663	78.2633	1636.44	1734097	130.984	2
WellR	4	12452	269.258	107.657	1464.52	4413398	354.433	0
WellR	5	12027	195.843	163.474	208.666	3511407	291.96	2
WellR	6	10081	187.153	196.355	75.0382	3604051	357.509	0
WellR	7	11463	248.413	220.004	1695.99	3276797	285.859	0
WellR	8	10415	313.754	316.467	1559.94	3121569	299.719	0
WellR	9	12103	201.942	441.862	223.596	4351873	359.57	0
WellR	10	10370	270.498	437.763	1735.31	3589921	346.183	0
WellR	11	11554	228.802	477.655	349.198	4540654	392.994	1
WellR	12	10100	204.14	495.893	84.7444	3902608	386.397	0
WellR	13	10895	326.447	545.561	1127.69	4474777	410.718	1
WellR	14	9480	258.951	584.471	1517.79	3587668	378.446	2
WellR	15	11118	365.521	627.18	635.563	6271721	564.105	0
WellR	16	9488	250.905	616.371	1364.52	4049049	426.755	2
WellR	17	11289	375.614	675.26	181.158	6209469	550.046	2
WellR	18	9673	240.33	685.308	1230.84	4367442	451.509	0
WellR	19	26688	324.339	737.827	225.475	14774229	553.591	2
WellR	20	10079	259.854	718.87	1389.4	4285913	425.232	1
WellR	21	9874	258.242	733.303	1519.25	3741035	378.877	1
WellR	22	10524	264.669	838.94	1592.1	4561874	433.473	0
WellR	23	9187	246.329	835.177	1279.34	3856530	419.781	0
WellR	24	12214	321.15	859.994	1148.17	5244640	429.396	3
WellR	25	15484	267.54	873.296	1461.47	5199643	335.807	0
WellR	26	13513	335.594	934.775	486.373	6171892	456.737	1
WellR	27	13428	309.656	961.791	739.599	5624232	418.844	4
WellR	28	11047	227.007	1012.53	111.816	6318141	571.933	3
WellR	29	12894	352.425	1034.93	378.785	5883982	456.335	0
WellR	30	15120	271.677	1042.92	1504.72	6382686	422.135	2
WellR	31	21650	319.461	1070.68	919.335	10104877	466.738	1
WellR	32	9232	299.879	1065.99	550.572	3725915	403.587	0
WellR	33	15240	279.936	1079.14	1368.99	6639368	435.654	1
WellR	34	10474	277.351	1122.74	639.294	1778878	169.838	1
WellR	35	13398	364.046	1159.47	452.647	6055157	451.945	0
WellR	36	15639	277.536	1194.98	1145.61	7354881	470.291	3
WellR	37	10242	244.79	1206.52	138.041	2500133	244.106	4
WellR	38	10709	311.009	1202.81	775.58	4219789	394.041	1
WellR	39	10020	324.982	1200.44	1010.47	4130729	412.248	1
WellR	40	12754	275.999	1220.46	1560.03	5067400	397.318	4
WellR	41	9448	309.55	1236.17	880.72	3863086	408.879	0
WellR	42	11534	292.478	1249.99	574.602	4955255	429.622	3
WellR	43	15014	309.573	1297.35	297.014	6502120	433.07	0
WellR	44	14155	246.063	1337.55	694.543	2416169	170.694	2
WellR	45	12343	325.738	1322.04	1362.11	2473546	200.401	1
WellR	46	7785	297.174	1350.54	120.555	1569121	201.557	0
WellR	47	11787	245.92	1362.6	428.893	1761105	149.411	4
WellR	48	13236	292.814	1373.95	1132.6	5475544	413.686	11
WellR	49	31509	306.573	1447.27	913.241	13497718	428.377	5
WellR	50	8871	311.016	1401.78	791.404	4490514	506.202	1
WellR	51	11053	254.817	1475.68	516.492	2134277	193.095	3
WellR	52	9495	251.592	1505.44	185.644	1588654	167.315	1
WellR	53	19213	294.04	1602.16	737.84	5872304	305.642	5
WellR	54	10706	300	1584.14	583.763	3710112	346.545	5
WellR	55	15330	292.567	1624.54	385.162	6889855	449.436	4
WellR	56	7705	291.938	1590.57	1127.63	1159029	150.426	4
WellR	57	9416	241.063	1705.84	1656.34	3279233	348.262	0
WellR	58	12994	260.345	1739.73	608.076	4643450	357.353	2
WellR	59	10574	263.425	1751.94	797.234	4998906	472.754	4
WellR	60	11371	257.329	1774.12	315.165	3806962	334.796	0
WellR	61	8306	251.456	1806.99	1997.08	3060865	368.513	0
WellR	62	9742	218.092	1840.26	221.937	1360462	139.649	2
WellR	63	22372	252.612	1885.78	409.175	8301624	371.072	0
WellR	64	8325	509.966	1860.47	843.925	10102858	1213.56	0
WellR	65	12491	226.899	1917.35	594.593	4658581	372.955	4
WellR	66	7730	249.428	1914.03	2004.43	3452730	446.666	1
WellR	1	10476	272.039	39.9328	1756.68	3741694	357.168	2
WellR	2	8584	235.385	79.7102	46.9427	2739858	319.182	0
WellR	3	13076	285.172	104.448	1675.71	4380015	334.966	3
WellR	4	10790	248.345	111.125	1994.99	3839396	355.829	0
WellR	5	12168	252.685	145.192	1565.86	3579774	294.196	5
WellR	6	7797	222.178	207.27	66.7312	2485884	318.826	1
WellR	8	8589	280.044	243.691	391.015	2936106	341.845	2
WellR	9	6055	289.332	237.007	289.036	2282415	376.947	0
WellR	10	11444	284.506	263.676	1451.08	3813488	333.23	2
WellR	11	14296	262.92	268.466	1958.28	4382985	306.588	1
WellR	12	13132	279.569	288.768	1605.66	4140281	315.282	3
WellR	13	12621	274.227	324.103	153.952	1706986	135.25	6
WellR	14	9021	303.972	350.413	384.756	3665589	406.34	2
WellR	15	13023	274.354	368.525	1745.75	3821165	293.417	6
WellR	16	15195	261.051	415.82	1613.11	4765290	313.609	0
WellR	17	10427	286.488	460.922	1990.43	3309402	317.388	1
WellR	18	13462	270.144	526.646	1734.91	4024373	298.943	1
WellR	19	16589	309.763	601.938	1466.35	2613255	157.529	0
WellR	20	12834	274.528	629.265	1862.23	4009393	312.404	0
WellR	21	29941	264.973	768.175	1660.23	10729581	358.357	0
WellR	22	10891	220.448	840.798	1747.27	3537491	324.809	0
WellR	23	9614	236.935	898.041	1845.75	2742915	285.304	0
WellR	24	10113	208.029	919.803	1989.96	1459080	144.278	0
WellR	25	10684	243.512	1042.23	1885.27	3264622	305.562	0
WellR	26	5081	328.035	1042.71	2020.33	1969799	387.679	0
WellR	27	12771	277.309	1057.39	1620.65	4375003	342.573	0
WellR	28	13743	288.942	1149.98	1864.65	4861551	353.747	2
WellR	29	14612	269.745	1163.89	1399.83	6389960	437.309	0
WellR	30	6945	511.155	1161.92	2002.14	4078359	587.237	0
WellR	31	10499	413.472	1210.37	439.783	5446456	518.76	0
WellR	32	12443	299.665	1217.89	1698.38	4820141	387.378	0
WellR	33	24225	303.904	1274.81	1538.4	9382940	387.325	1
WellR	34	14281	451.919	1252.17	952.453	8546118	598.426	1
WellR	35	9500	364.498	1334.42	378.955	6235019	656.318	2
WellR	37	11081	416.899	1382.98	681.433	5142082	464.045	0
WellR	38	9898	289.054	1402.19	918.235	4354538	439.941	0
WellR	39	9552	305.494	1413.66	797.872	3484224	364.764	3
WellR	40	20546	230.488	1427.01	1284.44	7417924	361.04	0
WellR	41	10990	335.511	1438.79	1859.68	4589726	417.627	1
WellR	42	10384	341.583	1442.49	1577.39	4644964	447.319	0
WellR	43	12466	346.353	1511.6	494.894	5881521	471.805	0
WellR	44	15039	335.159	1515.35	933.451	7234053	481.02	0
WellR	45	18393	283.408	1561.12	259.535	10624452	577.636	7
WellR	46	13472	357.173	1531.48	742.052	5928547	440.064	0
WellR	47	17616	287.848	1573.5	1136.61	9112208	517.269	0
WellR	48	8856	254.063	1606.35	1381.14	3663602	413.686	0
WellR	49	12299	383.463	1634.56	898.342	5861579	476.59	0
WellR	50	11163	408.255	1652.84	715.724	5734562	513.712	0
WellR	51	35810	262.339	1790.86	464.989	14507217	405.116	0
WellR	52	11221	248.544	1695.53	587.389	4458212	397.31	0
WellR	53	11313	242.973	1694.64	1246.56	5844811	516.646	2
WellR	54	10296	265.742	1741.39	875.793	3919956	380.726	0
WellR	55	10954	251.106	1763.47	703.42	4270105	389.822	0
WellR	56	5866	238.247	1760.76	1665.99	1082985	184.621	1
WellR	57	8979	271.485	1786.62	985.647	3746833	417.288	0
WellR	58	9743	255.576	1787.42	1090.38	3971277	407.603	1
WellR	59	9865	220.149	1792.78	278.811	3311673	335.699	0
WellR	60	10002	256.764	1853.67	97.7426	5715925	571.478	1
WellR	61	8565	259.967	1884.07	1166.11	3490753	407.56	0
WellR	62	8540	253.09	1915.66	1296.24	3549801	415.668	0
WellR	63	12347	195.747	1935.68	336.117	5510276	446.285	0
WellR	64	8939	243.733	1925.34	779	3726179	416.845	0
WellR	65	7363	487.139	1951.25	1858.92	6525104	886.202	0
WellR	2	10284	211.318	153.775	1623.78	3466568	337.084	0
WellR	3	12451	258.116	310.068	70.1536	4421845	355.14	0
WellR	5	10185	267.264	513.876	1331.96	3679238	361.241	2
WellR	6	23331	299.51	605.209	119.927	9367580	401.508	1
WellR	7	9717	278.886	654.6	1610.05	3108953	319.95	0
WellR	8	13017	210.628	686.788	1496.75	4512600	346.67	2
WellR	9	9770	237.125	720.839	1228.73	5613095	574.524	0
WellR	10	12897	206.579	860.471	1521.81	4085181	316.754	0
WellR	11	9583	258.172	885.52	1833.18	3060561	319.374	1
WellR	12	9587	249.064	919.913	1938.44	3921970	409.093	1
WellR	13	9279	246.333	922.261	1264.42	4236337	456.551	3
WellR	16	11445	241.164	949.444	1423.18	3852198	336.583	1
WellR	17	21363	255.2	1001.17	1615.11	7137671	334.114	0
WellR	18	6818	323.855	1047.47	32.8671	2876978	421.968	0
WellR	19	8970	281.077	1047.56	147.21	3680387	410.3	2
WellR	20	9173	250.411	1056.44	1137.34	1847400	201.395	3
WellR	21	22262	286.838	1117.59	1893.75	8794056	395.025	0
WellR	22	10469	234.885	1090.51	1510.77	4730762	451.883	0
WellR	23	7472	245.043	1120.6	2014.08	3102280	415.187	0
WellR	24	10664	261.895	1138.05	1379.51	4395548	412.186	2
WellR	25	15263	331.048	1155.66	420.099	2653391	173.845	1
WellR	26	15644	327.308	1172.12	137.172	7338972	469.124	2
WellR	27	10299	260.372	1173.17	1667.49	3764146	365.487	1
WellR	28	15714	327.1	1232.05	249.941	7533314	479.401	0
WellR	29	8627	301.916	1359.93	247.176	4555992	528.108	2
WellR	30	5295	296.493	1369.49	27.9798	1971624	372.356	0
WellR	31	9384	232.112	1433.37	1772.74	3703270	394.637	2
WellR	32	10396	238.899	1703.46	1723.49	3927521	377.792	1
WellR	33	9040	245.112	1769.67	1839.87	3073601	340	1
WellR	34	11697	337.498	1903.22	1714.82	4632520	396.043	0
WellR	35	11663	331.076	1950.74	1510.52	5004281	429.073	0
WellR	36	11809	321.287	1986.89	1830.06	4241945	359.213	0
WellR	37	5811	239.964	1979.11	2007.43	2029331	349.222	3
WellR	1	12707	448.916	63.7807	401.695	6640104	522.555	0
WellR	2	10826	243.472	71.9296	1710.63	4253649	392.91	2
WellR	3	9416	211.163	187.804	1118.8	2932912	311.482	0
WellR	4	9892	211.875	307.682	1182.89	3011820	304.47	0
WellR	5	7851	257.226	377.274	524.446	1849570	235.584	2
WellR	6	15058	405.367	447.481	1375.63	4518186	300.052	1
WellR	7	9546	231.799	459.241	981.448	3709068	388.547	1
WellR	8	8414	266.079	472.635	549.944	1821046	216.43	3
WellR	9	8656	253.261	506.215	1245.55	1220573	141.009	0
WellR	10	10281	226.935	544.136	1085.57	1560982	151.832	0
WellR	11	13914	284.665	594.313	1484.83	4924863	353.95	1
WellR	12	13555	309.859	645.42	1275.76	5218871	385.014	0
WellR	13	10406	247.113	685.51	1144.15	1511644	145.267	1
WellR	14	9967	263.014	701.582	1872.2	3218532	322.919	1
WellR	15	11720	286.126	747.26	1588.18	3713447	316.847	2
WellR	16	17642	314.857	788.924	1462.87	6857225	388.688	1
WellR	17	6913	292.303	785.211	1351.41	2951135	426.896	2
WellR	18	10304	246.652	863.973	1254.83	1534638	148.936	1
WellR	19	13268	257.561	873.213	1694.74	4488750	338.314	1
WellR	20	5945	253.953	935.142	30.8207	2863958	481.742	0
WellR	21	12231	316.795	967.09	1383.89	6335136	517.957	0
WellR	22	10067	298.86	972.43	1618.96	4495961	446.604	3
WellR	23	9825	345.293	1059.63	1142.21	6038814	614.638	0
WellR	24	11306	344.801	1065.8	1564.76	8371828	740.477	0
WellR	26	8251	234.406	1149.87	1993.02	2264992	274.511	0
WellR	27	5260	420.13	1190.76	1286.41	4189168	796.42	0
WellR	29	5536	387.37	1270.41	249.953	745805	134.719	0
WellR	30	10861	223.236	1323.62	1452.59	4171329	384.065	1
WellR	31	10376	349.097	1324.55	1095.23	6082684	586.226	2
WellR	33	7789	272.607	1362.03	1570.94	1095892	140.697	1
WellR	34	18758	351.859	1572	1380.76	10589779	564.547	0
WellR	35	8607	301.152	1569.35	1059.26	5391910	626.456	0
WellR	36	23314	253.934	1635.21	1722.36	3326398	142.678	5
WellR	38	5750	431.726	1648.21	1204.14	3780622	657.499	0
WellR	39	12356	361.99	1689.34	957.596	7558427	611.721	1
WellR	40	9890	277.761	1732.72	1082.05	5025563	508.146	1
WellR	41	13066	334.113	1739.42	1371.5	5899992	451.553	0
WellR	42	9750	465.238	1794.97	1210.38	1900141	194.886	0
WellR	43	24877	439.185	1921.53	1210.93	17806006	715.762	0
WellR	44	8531	248.721	1929.87	1792.2	3142523	368.365	1
WellR	45	8603	260.92	1998.14	1078.91	5299950	616.058	0
WellR	1	7351	223.176	36.3118	768.269	2616572	355.948	2
WellR	2	10584	191.806	85.4339	338.016	2971619	280.765	3
WellR	3	9118	213.171	88.1325	1288.39	3330911	365.312	1
WellR	4	10877	237.213	106.507	523.177	4067134	373.921	0
WellR	5	7132	249.417	107.07	1614.32	2900205	406.647	0
WellR	6	10037	204.369	143.111	1962.21	3169252	315.757	0
WellR	7	9742	246.53	413.641	961.939	5511749	565.772	2
WellR	8	10160	327.071	752.826	368.789	5547707	546.034	1
WellR	9	8222	263.486	787.497	1019.56	3636956	442.344	0
WellR	10	29043	404.814	897.738	164.311	18666221	642.71	0
WellR	11	8780	265.884	870.546	739.704	3456810	393.714	0
WellR	12	9201	263.682	928.325	496.702	3385421	367.941	0
WellR	13	7755	282.549	964.622	991.141	3221747	415.441	1
WellR	14	10427	342.349	1020.76	1961.02	4947465	474.486	0
WellR	15	23983	412.992	1161.8	536.744	4160114	173.461	9
WellR	17	6500	253.18	1158.73	2008.61	2413482	371.305	0
WellR	18	12063	228.958	1217.93	320.705	4165137	345.282	0
WellR	19	7834	415.586	1288.69	42.489	5629693	718.623	0
WellR	20	13407	344.412	1308.52	886.443	6109943	455.728	2
WellR	21	9108	457.013	1358.54	1102.09	1516619	166.515	0
WellR	22	12677	313.579	1392.78	306.142	6538121	515.747	1
WellR	23	12122	347.653	1445.45	1164.29	6308015	520.377	0
WellR	24	8126	287.858	1557.48	716.485	1165739	143.458	0
WellR	25	13241	288.75	1600.65	149.35	6465381	488.285	2
WellR	26	10481	366.248	1699.38	1441.16	5685584	542.466	1
WellR	27	10635	231.205	1707.65	501.511	2893688	272.091	1
WellR	28	10317	335.677	1751.95	1046.57	6381241	618.517	1
WellR	29	10691	335.331	1875.97	1033.74	5314421	497.093	2
WellR	30	11139	352.355	1890.79	1296.97	6344924	569.613	0
WellR	31	9329	241.163	1935.65	1623.76	4693840	503.145	4
WellS	1	9110	235.34	40.2763	1841.18	3101937	340.498	0
WellS	2	7956	241.585	174.453	2013.91	2746787	345.247	2
WellS	3	10359	276.598	169.678	1576.35	4671098	450.922	0
WellS	4	9740	261.752	266.129	1750.59	5343958	548.661	1
WellS	5	11042	227.745	370.859	1929.57	4882455	442.171	1
WellS	6	17748	302.877	436.039	824.694	9194269	518.045	3
WellS	7	46673	364.727	566.939	673.266	27225798	583.331	0
WellS	8	8715	287.48	539.276	885.048	3978425	456.503	1
WellS	9	16063	249.639	561.246	1943.25	3927122	244.482	0
WellS	10	10156	350.763	679.456	917.054	3965526	390.461	0
WellS	11	27518	383.665	734.868	733.629	13488988	490.188	2
WellS	12	12658	334.543	880.637	940.532	6896508	544.834	2
WellS	13	12005	287.259	933.39	645.741	5617482	467.929	2
WellS	14	12606	301.106	939.539	789.431	5936171	470.9	5
WellS	16	8788	234.291	1074.69	1793.06	3079095	350.375	1
WellS	17	9592	297.443	1113.08	894.832	7368558	768.198	6
WellS	19	7911	252	1159.49	1876.05	2857830	361.248	2
WellS	20	10898	239	1172.67	1680.64	3387627	310.849	5
WellS	21	9220	231.333	1184.65	1544.14	3668623	397.898	0
WellS	22	10690	257.106	1266.81	1733.83	3496390	327.071	2
WellS	23	9105	236.482	1276.49	1341.19	4210519	462.44	0
WellS	24	10720	241.599	1293.29	1507.86	4616636	430.656	1
WellS	25	16771	258.352	1372.29	1618.98	2388040	142.391	6
WellS	26	10065	251.092	1388.87	1181.04	4783925	475.303	7
WellS	27	11229	259.23	1450.7	1385.5	4184250	372.629	6
WellS	28	24407	296.564	1540.12	1629.73	9999697	409.706	3
WellS	29	31787	269.833	1567.58	1363.7	12341667	388.261	2
WellS	30	10179	282.423	1699.21	1307.66	4914039	482.762	3
WellS	31	8910	250.838	1772.85	1687.42	3584447	402.295	0
WellS	32	13617	324.942	1795.17	1478.19	10475828	769.32	4
WellS	33	14458	357.756	1856.75	1300.44	11659398	806.432	1
WellS	1	6733	185.862	31.1516	96.0192	1756534	260.884	0
WellS	3	8896	228.275	31.66	1393.25	3664670	411.946	0
WellS	4	10512	295.628	102.942	448.269	4458908	424.173	1
WellS	5	12044	274.017	136.652	1581.44	5037893	418.291	1
WellS	6	5861	198.075	177.629	23.9473	1647567	281.107	0
WellS	7	12210	268.744	190.906	1012.16	5055052	414.009	1
WellS	8	22373	302.309	240.799	1145.8	10979981	490.769	1
WellS	9	18298	301.45	211.005	1398.84	8295890	453.377	0
WellS	11	12105	218.687	252.866	209.47	6680867	551.91	2
WellS	13	8514	222.462	278.947	1813.19	2218756	260.601	0
WellS	15	10387	280.679	340.999	899.296	5163837	497.144	3
WellS	16	9028	222.842	365.609	1731.66	3124688	346.111	0
WellS	17	11370	202.49	395.597	73.4832	5155259	453.409	6
WellS	18	9177	264.721	393.406	405.104	3841806	418.634	2
WellS	19	9709	263.564	425.747	217.429	4231449	435.827	3
WellS	20	9081	229.277	441.501	1382.49	3396370	374.008	1
WellS	21	11541	286.15	457.815	1569.08	5212304	451.634	0
WellS	22	7617	249.437	453.404	1823.55	3012087	395.443	0
WellS	23	10799	257.828	499.745	119.449	4896891	453.458	0
WellS	24	11278	325.166	497.291	1262.82	6038188	535.395	0
WellS	25	14035	292.701	538.374	1987.81	6230493	443.925	0
WellS	26	12741	303.775	521.805	1015.46	6098724	478.669	2
WellS	27	10132	340.727	552.453	1792.42	5744976	567.013	0
WellS	28	10533	241.3	556.095	1146.65	4547867	431.773	0
WellS	29	8991	226.392	579.574	1435.57	3080123	342.578	0
WellS	30	8875	261.145	642.266	1075.55	3646458	410.869	0
WellS	31	7148	274.743	639.884	1271.22	2960024	414.105	0
WellS	32	8555	221.377	656.166	1631.64	2488521	290.885	3
WellS	33	9807	222.13	670.588	1827.08	3416932	348.418	0
WellS	34	9648	265.664	681.775	115.248	4871379	504.911	1
WellS	35	6644	308.884	685.726	1197.23	3071675	462.323	0
WellS	36	10101	212.038	741.617	1696.97	3214299	318.216	2
WellS	37	6936	263.351	738.889	1429.44	1735505	250.217	1
WellS	38	5337	364.196	740.285	1096.23	2629110	492.619	0
WellS	39	10380	348.375	795.245	214.25	5703766	549.496	0
WellS	40	17516	246.572	842.359	1483.8	5602800	319.868	3
WellS	42	6817	325.829	810.533	1129.87	3782835	554.912	0
WellS	43	10137	210.636	841.094	1927.5	3249553	320.564	1
WellS	44	7863	226.988	954.183	38.3949	2182183	277.525	1
WellS	45	11578	223.138	1076.14	1610.13	4016903	346.943	2
WellS	47	10153	215.636	1168.25	1402.62	4116476	405.444	4
WellS	49	7033	265.676	1340.53	1801.71	2875705	408.887	0
WellS	50	8077	286.986	1616.66	543.328	3669703	454.34	2
WellS	51	10203	252.635	1628.34	240.15	5975480	585.659	4
WellS	52	7050	278.821	1695.52	1541.02	3532059	501.001	0
WellS	53	9129	253.834	1814.69	723.344	4462634	488.841	1
WellS	54	18100	247.145	1839.73	1234.32	5511802	304.519	2
WellS	55	5924	296.597	1893.82	26.1366	5004546	844.792	0
WellS	2	12778	205.57	63.4571	1821.51	3707683	290.161	1
WellS	3	9113	192.748	98.2051	228.613	2523964	276.963	0
WellS	4	10175	216.309	125.974	1981.11	3435558	337.647	1
WellS	5	12717	206.936	152.627	1656.19	4453050	350.165	0
WellS	6	21621	216.646	304.306	1891.9	8617037	398.549	3
WellS	7	8633	266.529	241.88	47.7476	3133963	363.021	0
WellS	8	11302	319.464	293.147	516.652	5103953	451.597	0
WellS	9	19952	343.205	338.842	747.71	8904300	446.286	2
WellS	10	13428	275.534	307.457	293.25	5539271	412.516	6
WellS	11	13482	233.702	443.759	379.507	1935918	143.593	1
WellS	12	8645	250.375	442.013	2001.62	4500337	520.571	0
WellS	13	17913	315.601	511.59	262.889	7903608	441.222	0
WellS	14	8178	296.181	508.784	28.9625	3393347	414.936	0
WellS	15	10188	228.68	545.374	493.92	1456827	142.994	1
WellS	16	10772	242.258	717.288	508.296	2415546	224.243	0
WellS	17	28692	300.375	771.481	338.311	14852608	517.657	0
WellS	18	12078	442.338	799.29	66.62	5024380	415.994	0
WellS	20	13980	219.147	1078.09	465.941	2103848	150.49	1
WellS	21	10470	249.629	1172.05	319.017	6013606	574.365	0
WellS	22	8220	219.519	1242.66	49.3637	3914490	476.215	0
WellS	23	10943	380.775	1283.82	673.071	7548678	689.818	3
WellS	24	12462	376.672	1319.52	573.7	8732738	700.749	1
WellS	25	10875	356.792	1363.43	981.986	8700278	800.026	2
WellS	26	14072	341.577	1488.62	520.922	9610500	682.952	2
WellS	27	12845	386.648	1509.69	744.646	8884649	691.682	1
WellS	28	11730	217.78	1530.49	354.731	1782598	151.969	4
WellS	29	11157	332.374	1525.9	863.575	6800359	609.515	1
WellS	30	10382	433.446	1543.23	1027.61	8269952	796.566	0
WellS	31	18004	442.618	1723.44	902.377	12544709	696.773	0
WellS	32	12233	375.98	1726.5	544.547	8558406	699.616	2
WellS	33	10862	360.653	1894	814.726	8065544	742.547	0
WellS	1	9123	188.762	50.9178	79.4492	3424661	375.388	0
WellS	2	7617	225.878	31.5742	860.248	2159847	283.556	0
WellS	3	7726	207.717	40.2644	1227.59	2640339	341.747	1
WellS	4	18320	214.133	110.517	316.097	5777765	315.38	3
WellS	5	16765	227.559	105.621	669.327	6191097	369.287	0
WellS	7	8550	223.909	103.189	456.293	3166974	370.406	4
WellS	8	9428	203.86	159.446	204.709	2673126	283.531	1
WellS	9	9635	203.805	168.737	1066.04	3148851	326.814	1
WellS	10	9539	202.049	169.729	58.0001	4199274	440.222	0
WellS	11	9351	200.892	218.374	1376.3	3455852	369.57	2
WellS	12	10302	204.939	247.684	753.065	1668860	161.994	1
WellS	13	5394	346.12	251.754	397.693	3130591	580.384	0
WellS	14	25654	229.674	329.281	104.512	9511964	370.779	4
WellS	16	9404	220.229	395.721	618.508	2362540	251.227	2
WellS	17	11571	267.628	393.852	1737.46	4312778	372.723	2
WellS	21	9757	227.779	466.359	366.578	4251859	435.775	4
WellS	22	13748	296.295	550.819	966.186	6902467	502.071	1
WellS	23	22816	367.411	711.342	508.19	3876440	169.9	5
WellS	24	11835	270.544	732.151	988.382	4225019	356.994	2
WellS	25	23886	390.777	794.155	838.825	12931351	541.378	2
WellS	26	10778	254.678	853.525	1122.48	4514348	418.848	3
WellS	27	9546	269.37	901.936	1019.52	1499004	157.03	0
WellS	28	10423	297.616	910.472	705.223	5955141	571.346	3
WellS	29	5023	394.291	1024.83	1012.55	4223053	840.743	0
WellS	30	5629	389.365	1091.29	998.401	5684679	1009.89	0
WellS	31	18268	260.37	1368.49	1150.6	2800151	153.282	0
WellS	32	9646	357.998	1710.36	310.382	7542344	781.914	0
WellS	33	13011	312.648	1913.54	1879.68	7206857	553.905	0
WellS	1	9740	250.295	172.797	1104.35	3670974	376.897	2
WellS	2	5365	228.396	234.476	2015.55	2037096	379.701	0
WellS	3	9706	226.829	238.879	928.362	3557722	366.549	0
WellS	4	10615	270.599	259.607	1300.45	5049643	475.708	1
WellS	5	6706	285.399	260.687	677.505	2203413	328.573	3
WellS	6	10981	250.779	358.456	1146.83	4081354	371.674	1
WellS	7	10912	228.038	528.869	407.323	4079830	373.885	1
WellS	8	8517	255.473	541.142	592.644	4263579	500.596	4
WellS	9	11803	291.384	646.596	1113.31	6253632	529.834	2
WellS	10	8994	228.333	700.977	245.597	4061926	451.626	4
WellS	11	10049	242.647	801.553	675.076	4300684	427.971	2
WellS	12	9206	246.854	805.957	485.66	3844501	417.608	1
WellS	13	10115	266.487	872.835	1157.93	4462277	441.154	2
WellS	14	11592	239.124	926.852	1021.1	5749640	496.001	0
WellS	15	12304	248.291	938.104	358.626	1725780	140.262	0
WellS	16	10835	267.407	944.6	818.587	6338108	584.966	6
WellS	17	11399	297.044	965.145	695.882	1865762	163.678	4
WellS	18	10746	241.129	966.807	1383.18	3917169	364.523	0
WellS	19	10938	244.729	1022.53	1076.25	4790889	438.004	2
WellS	20	20516	244.568	1076.08	1223.45	8083542	394.012	2
WellS	21	12034	257.765	1055.19	888.014	7110143	590.838	5
WellS	22	7283	194.165	1132.97	41.0018	1509007	207.196	2
WellS	23	12594	265.378	1176.52	731.975	5878974	466.808	2
WellS	24	12897	231.082	1190.32	573.386	4570365	354.374	3
WellS	25	11489	212.857	1196.15	1608.12	4567472	397.552	3
WellS	26	8464	249.428	1211.25	1382.18	4070956	480.973	1
WellS	27	18709	288.649	1247.09	965.929	12606547	673.823	3
WellS	28	14648	203.412	1220.9	350.553	1950797	133.178	3
WellS	29	13147	240.613	1302.7	698.614	8551960	650.488	2
WellS	30	10476	240.471	1331.98	1470.18	3822489	364.881	1
WellS	31	7555	281.396	1343.68	1379.68	3832564	507.288	1
WellS	32	11133	260.774	1353.94	141.697	5637158	506.347	1
WellS	34	13260	313.088	1368.45	1963.65	4326446	326.278	5
WellS	35	9379	248.363	1373.83	1180.75	4675117	498.466	1
WellS	36	10627	218.855	1378.62	1680.12	4078565	383.793	0
WellS	37	11279	244.804	1388.05	966.329	5774907	512.005	1
WellS	38	8841	256.206	1408.87	1294.19	3650813	412.941	1
WellS	39	12849	230.806	1418.16	557.584	6968568	542.343	3
WellS	40	11228	252.776	1422.39	244.955	5076028	452.087	1
WellS	41	15504	239.282	1457.22	392.246	6637111	428.09	10
WellS	42	6138	238.611	1447.23	30.1093	2982943	485.98	1
WellS	43	9892	253.39	1477.66	784.254	1422083	143.761	0
WellS	44	5790	318.677	1485.88	1646.58	3198135	552.355	0
WellS	45	12838	222.687	1507.85	1095.67	5613038	437.221	1
WellS	46	10734	336.21	1515.01	1834.25	4083131	380.392	3
WellS	47	12064	335.758	1529.34	1430.31	4836819	400.93	0
WellS	48	9555	338.908	1527.17	1993.73	3798617	397.553	0
WellS	49	8449	268.956	1518.55	1320.63	1346012	159.31	0
WellS	50	11814	231.571	1538.69	103.792	4895243	414.359	1
WellS	51	6699	296.171	1531.54	1556.52	3015280	450.109	1
WellS	52	11265	233.901	1574.99	952.442	5144067	456.642	3
WellS	53	14085	252.504	1604.48	556.156	6134202	435.513	5
WellS	54	10965	339.524	1633.9	1906.25	4646867	423.791	1
WellS	55	10124	256.598	1666.66	1218.03	1976386	195.218	1
WellS	56	9848	238.306	1656.79	93.8883	4480447	454.96	1
WellS	57	23311	321.162	1691.88	1373.61	11311573	485.246	4
WellS	58	10569	255.451	1681.97	287.133	6281327	594.316	0
WellS	59	7238	269.964	1681.87	1665.43	2521257	348.336	0
WellS	61	9471	264.412	1713.51	628.272	1507332	159.152	0
WellS	62	16198	288.389	1728.83	458.23	2625600	162.094	2
WellS	63	9617	251.28	1733.19	752.623	4472803	465.093	1
WellS	64	7118	297.746	1726.51	1499.31	2686159	377.376	2
WellS	65	11436	232.742	1770.4	1061.01	4714166	412.222	3
WellS	66	23147	306.088	1826.78	1215.42	10355829	447.394	0
WellS	67	13864	266.805	1872.83	1620.67	5086738	366.903	1
WellS	68	23532	267.29	1929.91	1932.67	9186703	390.392	4
WellS	69	32739	333.595	1953.61	1410.91	17868710	545.793	0
WellS	70	13693	289.122	1930.15	624.624	8348439	609.687	1
WellS	71	11751	294.547	1939.56	1080.07	5369526	456.942	1
WellS	72	11618	248.528	1963.2	1807.47	4859210	418.248	1
WellS	73	11775	278.028	1972.91	1709.42	4243466	360.379	3
WellS	74	8409	298.604	2018.62	1218.51	3564636	423.907	1
WellS	1	8308	227.903	113.119	1960.79	3100968	373.251	1
WellS	2	10671	237.16	166.531	1650.51	4202583	393.832	3
WellS	4	8822	223.761	269.561	1508.71	3210519	363.922	0
WellS	5	5533	233.065	303.137	2017.68	1941632	350.918	0
WellS	6	10983	194.857	333.281	120.781	1810656	164.86	1
WellS	7	7275	245.462	330.388	1235.25	2855571	392.518	1
WellS	8	6953	252.083	337.53	1588.23	2575599	370.43	0
WellS	9	8147	221.288	421.553	49.8143	3003417	368.653	0
WellS	10	11086	206.915	466.228	1983.83	3855199	347.754	0
WellS	11	13877	271.378	579.008	1351.47	5871585	423.116	0
WellS	12	13173	233.081	576.96	1681.17	5146908	390.716	1
WellS	13	23747	298.273	680.879	1862.2	8875809	373.765	2
WellS	14	9687	237.79	678.637	229.111	4037402	416.786	3
WellS	15	8837	282.232	698.953	492.267	4326498	489.589	1
WellS	16	24370	231.499	716.139	1561.03	8394984	344.48	2
WellS	18	12467	201.726	758.612	1344.29	3099842	248.644	2
WellS	19	10393	234.88	802.995	243.286	3875898	372.934	1
WellS	20	10286	294.918	837.847	1807.36	3844889	373.798	0
WellS	21	10812	242.38	838.387	656.203	1941114	179.533	2
WellS	22	10035	332.286	871.56	1926.72	4385166	436.987	0
WellS	23	12985	205.019	886.75	1635.83	1819820	140.148	1
WellS	24	10633	282.966	919.047	803.099	4992123	469.493	1
WellS	25	10368	346.197	965.84	2008.47	5326606	513.754	0
WellS	26	11881	231.825	922.239	1339.6	5793177	487.6	1
WellS	27	12441	218.596	927.204	1466.73	5913723	475.341	1
WellS	28	10790	253.793	923.611	502.553	5320476	493.093	1
WellS	29	10127	243.635	951.321	298.71	3666397	362.042	4
WellS	30	7318	284.707	968.913	1857.32	3140233	429.111	0
WellS	31	6398	293.604	970.105	1715.73	2751739	430.094	1
WellS	32	19006	282.924	1078.09	421.473	10089801	530.875	2
WellS	33	7821	304.307	1033.94	1773.21	3222285	412.004	0
WellS	34	18070	313.868	1052.56	1604.22	7046543	389.958	0
WellS	35	12906	338.046	1062.32	955.313	10559790	818.208	0
WellS	36	12597	225.803	1124.62	246.604	4877028	387.158	1
WellS	37	12104	330.586	1114.36	1914.76	2131785	176.122	0
WellS	38	9443	340.02	1167.55	1609.41	3745504	396.643	1
WellS	39	8835	260.738	1172.69	1721.47	4149853	469.706	0
WellS	40	17656	265.204	1234.05	106.654	2363289	133.852	1
WellS	41	10574	260.098	1212.38	340.401	5943244	562.062	1
WellS	43	15250	355.028	1263.7	1500.71	6925271	454.116	1
WellS	44	6213	330.783	1245.86	1937.59	2476528	398.604	0
WellS	45	19302	312.681	1338.41	1706.89	8392316	434.79	1
WellS	46	12711	218.348	1349.8	236.243	5036231	396.21	1
WellS	47	6976	299.247	1321.41	1839.99	2849952	408.537	0
WellS	48	13189	297.512	1349.23	1380.59	6206357	470.571	2
WellS	49	10077	383.655	1344.38	1987.32	5729840	568.606	0
WellS	50	12230	232.726	1394.45	374.473	5294685	432.926	1
WellS	51	6322	322.384	1433.76	1835.39	2810524	444.562	0
WellS	52	19483	312.931	1494.32	1624.6	6324416	324.612	1
WellS	53	9756	361.586	1475.92	2006.98	5970979	612.031	0
WellS	54	15098	345.446	1515.65	1468.91	8016159	530.942	2
WellS	55	7227	307.693	1496.5	1915.45	3631962	502.555	0
WellS	56	12003	222.245	1519.18	264.233	4818752	401.462	0
WellS	57	10879	245.236	1552.12	445.827	4973091	457.128	0
WellS	59	6408	318.343	1566.23	1809.74	3407944	531.826	0
WellS	60	11524	256.818	1653.63	334.894	4969206	431.205	0
WellS	61	12424	235.083	1662	109.652	3916207	315.213	0
WellS	62	6682	264.898	1705.9	29.5657	2395071	358.436	0
WellS	63	22415	384.963	1780.99	424.065	12396449	553.043	0
WellS	64	8088	271.777	1765.79	1500.66	4719855	583.563	0
WellS	65	11080	322.645	1784.98	227.218	3789174	341.983	1
WellS	66	10288	206.527	1873.98	131.248	4242521	412.376	0
WellS	67	10529	228.177	1984.62	271.05	4464017	423.974	1
WellS	1	10184	225.593	179.289	273.283	4428343	434.833	3
WellS	3	11436	306.746	318.782	438.741	5159965	451.204	0
WellS	4	8835	220.25	519.454	139.019	3177006	359.593	0
WellS	5	6568	278.347	591.511	206.741	2528441	384.964	0
WellS	6	9902	395.81	610.839	594.281	5843377	590.121	1
WellS	7	9384	186.303	722.294	48.5568	3087831	329.053	1
WellS	8	5694	308.542	690.98	223.247	2198213	386.058	1
WellS	9	11373	256.578	756.75	1253.05	5056099	444.57	3
WellS	10	10363	370.015	797.293	566.951	6271771	605.208	0
WellS	11	15727	320.948	925.453	47.5834	8192237	520.903	0
WellS	12	10046	271.083	912.188	1290.74	5174261	515.057	6
WellS	13	9794	256.475	912.111	1446.83	4018093	410.261	0
WellS	14	14455	320.891	943.045	255.262	10018495	693.082	2
WellS	15	16857	312.033	955.239	414.466	13962621	828.298	0
WellS	16	12439	285.211	944.593	1867.03	6046516	486.093	3
WellS	17	9186	294.974	967.077	1186.83	4875315	530.733	2
WellS	18	13402	277.981	1014.8	1504.16	6988498	521.452	0
WellS	19	10515	287.967	1063.79	105.964	5203107	494.827	1
WellS	20	14556	280.562	1097.89	1307.52	7490688	514.612	1
WellS	21	8295	230.947	1075.31	1611.73	3323458	400.658	1
WellS	22	19748	295.542	1149.65	222.911	9828680	497.705	3
WellS	23	7827	437.128	1132.61	1419.6	8813863	1126.08	0
WellS	25	8345	227.558	1215.73	1574.78	2590976	310.482	3
WellS	26	9486	443.772	1261.71	1039.16	14485484	1527.04	0
WellS	27	8909	321.009	1262.66	61.1687	4350301	488.304	1
WellS	28	10542	325.821	1292.26	1702.22	6267456	594.522	0
WellS	30	8546	403.616	1364.98	134.616	5946924	695.872	0
WellS	31	9324	289.164	1383.17	364.357	6201261	665.086	4
WellS	32	8701	249.767	1465.6	1958.5	3853350	442.863	2
WellS	34	17167	378.172	1850.39	1441.89	11108932	647.11	0
WellS	1	12565	277.552	295.412	1086.66	6518378	518.773	1
WellS	2	13158	274.382	341.864	901.029	5282225	401.446	2
WellS	3	10824	216.266	512.843	728.761	1454106	134.341	5
WellS	4	10103	250.674	548.696	1232.69	4901205	485.124	2
WellS	5	12076	211.826	595.949	962.973	5541693	458.901	7
WellS	6	11368	354.086	700.746	571.139	6587691	579.494	2
WellS	7	13638	312.547	698.322	759.3	6841921	501.681	1
WellS	8	14608	286.879	760.215	1039.53	6305571	431.652	1
WellS	9	19942	258.947	825.562	876.402	9689372	485.878	1
WellS	10	21461	302.705	844.907	563.871	9374556	436.818	3
WellS	11	10686	264.57	902.413	709.021	4736469	443.241	0
WellS	12	14446	205.242	942.447	1283.81	5313221	367.799	2
WellS	13	9775	307.857	962.234	441.85	4513620	461.751	2
WellS	14	12425	293.407	982.496	1788.5	4659824	375.036	1
WellS	15	16741	284.849	1028	319.373	7302522	436.206	2
WellS	16	13108	211.603	1016.39	1007.34	2022079	154.263	1
WellS	17	10500	314.09	1014.58	1546.5	4795682	456.732	0
WellS	18	21799	340.186	1036.99	617.44	10523909	482.77	7
WellS	19	9743	269.625	1038.05	810.955	4358389	447.335	1
WellS	20	10447	237.257	1102.41	1347.81	5230299	500.651	0
WellS	21	11305	228.29	1134.73	220.755	1545610	136.719	2
WellS	22	15469	264.914	1128.84	1838.91	5987899	387.09	1
WellS	23	13699	342.831	1127	435.809	6463206	471.801	1
WellS	24	10921	204.619	1137.4	76.6891	1356944	124.251	5
WellS	25	10277	236.382	1172.35	1416.34	4573787	445.051	1
WellS	26	8488	296.113	1167.4	847.375	3941215	464.328	0
WellS	27	14607	196.994	1188.37	1164.83	2110032	144.453	2
WellS	28	9559	283.995	1204.33	732.98	6013335	629.076	0
WellS	29	13847	280.625	1220.36	1576.85	6747508	487.29	1
WellS	30	11111	263.055	1213.51	572.737	5967346	537.067	3
WellS	31	10747	264.82	1260.66	459.081	5740315	534.132	2
WellS	32	10479	275.764	1277.71	297.585	5445930	519.699	7
WellS	33	13642	207.285	1294.74	1985.77	1997756	146.442	1
WellS	34	12124	231.378	1303.69	974.348	1833362	151.218	2
WellS	35	8624	285.147	1302.79	1203.33	5874965	681.234	0
WellS	36	10791	232.982	1340.05	1849.35	4104008	380.318	0
WellS	37	8612	279.264	1360.19	1269.76	4711866	547.128	0
WellS	38	20349	305.743	1368.57	1677.95	7975840	391.952	0
WellS	39	11014	265.781	1385.91	1105.6	7126751	647.063	3
WellS	40	9297	269.669	1384.96	613.929	5369137	577.513	2
WellS	41	11986	332.167	1384.74	1508.09	5469522	456.326	1
WellS	42	15065	240.497	1424.95	1368.23	6438347	427.371	3
WellS	43	17722	257.008	1463.46	1950.44	5708343	322.105	0
WellS	44	10059	242.579	1458.66	1797.97	3316919	329.746	1
WellS	45	8654	294.763	1472.39	1019.13	6669925	770.733	1
WellS	46	12802	351.922	1505.4	1177.2	6248273	488.07	1
WellS	47	9291	253.262	1503.25	1679.1	3311979	356.472	1
WellS	48	13714	293.556	1578.32	1476.8	5876519	428.505	1
WellS	49	39802	312.131	1710.01	1702.53	16671595	418.863	4
WellS	50	13679	329.455	1632.64	1211.16	7051689	515.512	1
WellS	51	9178	257.171	1632.3	536.475	4817708	524.919	1
WellS	52	14999	285.336	1643.87	1935.75	6610956	440.76	2
WellS	53	16029	273.852	1769.65	1450.74	7857539	490.208	1
WellS	54	11838	346.634	1848.22	1930.18	5742216	485.066	1
WellS	55	11807	294.117	1876.45	1122.23	5243463	444.098	2
WellS	56	9807	286.875	1911.76	424.775	3513934	358.309	0
WellS	57	8520	218.039	1994.5	304.04	1223943	143.655	5
WellS	1	7715	191.224	41.5682	772.938	2375765	307.941	3
WellS	2	6445	237.531	23.622	1230.33	1928673	299.251	1
WellS	4	8774	223.108	106.319	885.276	3056007	348.303	2
WellS	5	13709	254.017	128.389	1304.32	3936209	287.126	4
WellS	6	12803	207.938	167.621	1667.37	3929487	306.919	1
WellS	7	9433	217.322	155.811	1075.39	3250240	344.561	1
WellS	8	13438	262.402	169.246	1452.94	4082935	303.835	4
WellS	9	5878	193.69	189.359	2001.1	1967628	334.744	2
WellS	10	13103	274.635	253.484	1028.44	5206737	397.37	0
WellS	11	12941	278.387	298.557	1758.47	5279690	407.982	3
WellS	12	8567	224.432	373.912	1259.12	2901233	338.652	0
WellS	13	9730	261.362	388.414	600.003	4018786	413.03	3
WellS	14	12909	268.546	426.791	1492.28	3663083	283.762	3
WellS	15	12526	292.69	415.908	402.565	5534776	441.863	2
WellS	16	11030	290.917	422.915	1998.32	4122221	373.728	1
WellS	17	10167	220.895	459.249	1901.83	1363524	134.113	2
WellS	18	13999	265.872	473.942	1708.25	3902171	278.746	1
WellS	19	11785	231.181	525.726	1586.14	4055989	344.165	1
WellS	20	9181	231.272	540.358	1366.31	3300830	359.528	4
WellS	21	10169	268.52	562.102	540.125	4458859	438.476	5
WellS	22	12086	229.417	573.958	1815.1	3535808	292.554	2
WellS	23	10847	301.554	651.605	1702.31	4495186	414.417	1
WellS	24	7378	293.383	661.128	980.566	3985652	540.208	1
WellS	25	10921	241.16	677.093	1884.78	3752315	343.587	0
WellS	26	8804	233.927	732.915	1326.11	3312908	376.296	0
WellS	27	12329	285.254	832.54	1433.36	4536519	367.955	0
WellS	28	6108	257.712	928.12	2014.47	920729	150.741	0
WellS	29	5410	313.543	1048.17	2017.23	1950450	360.527	0
WellS	30	7996	238.762	1062.25	1475.51	3217234	402.355	0
WellS	31	10389	213.529	1162.71	75.0936	3947909	380.009	0
WellS	32	9954	225.853	1473.42	52.4315	4233539	425.31	0
WellS	33	10010	212.113	1895.27	331.375	1271507	127.024	0
WellS	34	12074	198.772	1950.55	135.59	3803302	314.999	4
WellS	1	15847	206.3	75.2695	82.4625	5917857	373.437	5
WellS	4	10927	285.309	144.291	418.551	4463363	408.471	2
WellS	5	9816	341.324	146.511	1456.88	4629355	471.613	0
WellS	6	11441	303.156	164.202	1244.72	5792268	506.273	0
WellS	7	5552	183.381	187.182	37.1354	1893212	340.996	4
WellS	8	10636	278.945	249.588	1592.53	4521391	425.103	1
WellS	9	11647	315.435	263.625	1802.51	4790115	411.275	0
WellS	10	24853	290.195	313.569	1431.42	10677103	429.61	1
WellS	11	12329	200.868	305.003	1218.38	3982630	323.029	5
WellS	12	10993	221.389	297.384	647.978	4556110	414.456	0
WellS	13	10883	318.451	337.026	1038.53	4792853	440.398	0
WellS	14	11295	322.716	412.067	1588.89	5167625	457.514	0
WellS	15	10684	226.031	418.781	1143.48	5681710	531.796	5
WellS	17	12089	319.448	459.868	795.137	6218423	514.387	1
WellS	18	12230	311.708	484.45	1416.3	5965204	487.752	0
WellS	19	19822	284.184	533.907	214.81	2956845	149.17	7
WellS	20	10467	235	617.434	1066.24	4271157	408.059	0
WellS	21	13021	276.484	691.803	80.3309	5126742	393.729	1
WellS	22	26078	272.985	840.227	333.749	11666689	447.377	4
WellS	23	8223	261.446	851.685	158.209	3723852	452.858	3
WellS	24	5371	273.656	893.486	1923.63	827006	153.976	1
WellS	26	8825	253.882	950.437	114.25	3969084	449.755	2
WellS	27	8906	264.18	966.761	239.485	4342342	487.575	5
WellS	28	11186	259.557	1049.67	478.485	7148186	639.03	5
WellS	29	5728	332.536	1055.11	28.6859	2367518	413.324	0
WellS	30	11432	461.941	1239.46	925.756	8654020	757	0
WellS	31	9562	256.812	1746.26	1991.58	3723347	389.39	1
WellS	32	6120	361.738	1753.95	1016.98	4384106	716.357	0
WellS	33	12158	245.661	1795.38	1675.42	4924246	405.021	4
WellS	34	6931	346.098	1791.36	938.326	4768525	688	0
WellS	35	10033	263.16	1836.47	1935.47	3642719	363.074	0
WellS	36	15276	390.282	1883.21	1194.56	10899675	713.516	2
WellS	37	10474	223.582	1960.88	1520.92	4270429	407.717	1
WellS	38	10180	335.817	1982.09	810.217	6252991	614.243	2
WellS	40	6123	292.769	2005.18	1679.36	3128042	510.868	0
WellS	1	6400	260.746	44.367	1411.28	3450441	539.131	0
WellS	2	6087	296.829	209.851	604.264	2955602	485.56	3
WellS	3	8131	263.061	774.42	1492.64	4265655	524.616	1
WellS	4	15431	398.81	862.653	954.124	12221574	792.014	0
WellS	5	8030	302.917	957.192	608.615	5498215	684.709	1
WellS	6	6703	274.859	1106.58	1689.06	3076364	458.953	1
WellS	7	8731	372.026	1147.12	1772.61	3963408	453.947	0
WellS	8	10092	363.052	1176.78	665.486	7044743	698.052	3
WellS	9	11628	278.585	1193.9	1625	6044045	519.784	2
WellS	10	11829	303.051	1206.17	1326.55	7618580	644.06	0
WellS	11	10160	351.807	1265.39	1853.99	4274712	420.739	0
WellS	12	13405	297.292	1305.26	1662.42	5515622	411.46	0
WellS	13	9757	222.587	1379.96	1473.61	5110997	523.829	1
WellS	14	8911	362.275	1467.35	1959.93	5106629	573.07	2
WellS	15	9242	249.42	1487.09	1635.2	4110017	444.711	0
WellS	16	9024	264.563	1511.66	1722.58	4306312	477.207	0
WellS	17	12732	328.914	1552.92	1825.52	7288679	572.469	0
WellS	18	12184	309.085	1674.1	1411.15	5774550	473.945	3
WellS	19	11398	358.015	1667.88	1106.98	7183589	630.25	0
WellS	20	7856	302.94	1685.68	909.886	6707846	853.85	0
WellS	21	11846	271.273	1824.88	108.584	5342417	450.989	1
WellS	22	8310	243.879	1888.72	348.478	4765359	573.449	2
WellS	23	9953	185.62	1986.85	53.5742	2923982	293.779	1
WellS	24	8094	282.394	2008.28	195.247	3943917	487.264	3
WellS	1	7424	217.793	36.8832	1317.73	1810133	243.822	2
WellS	4	9280	211.151	92.3261	114.027	3686315	397.232	2
WellS	5	11875	259.236	100.816	1013.52	4137956	348.459	3
WellS	6	9644	208.133	101.434	275.66	3975172	412.191	1
WellS	7	6348	270.241	114.167	1544.84	2261381	356.235	1
WellS	8	13538	198.144	188.433	540.572	3835167	283.289	0
WellS	9	10173	212.577	214.764	1480.52	3267482	321.192	1
WellS	10	11851	222.518	267.953	844.383	3849510	324.826	3
WellS	11	13436	259.095	319.947	1098	4657202	346.621	6
WellS	12	9618	209.021	332.159	200.971	4841268	503.355	0
WellS	13	13402	223.153	363.209	468.832	4265104	318.244	0
WellS	14	14944	219.839	373.04	664.97	5272718	352.832	2
WellS	15	8569	235.054	435.615	1453.63	1811262	211.374	2
WellS	16	12768	321.454	534.789	926.399	8102943	634.629	0
WellS	17	13142	277.352	557.64	1235.22	4684834	356.478	4
WellS	18	10268	220.217	557.839	1498.9	4174611	406.565	4
WellS	19	14388	305.8	575.602	637.731	7718756	536.472	2
WellS	20	9708	219.125	556.392	225.387	4906142	505.371	0
WellS	21	13219	212.318	623.212	1105.52	4368203	330.449	3
WellS	22	8641	236.928	657.839	1582.12	4342768	502.577	2
WellS	23	13816	272.676	673.336	445.026	6462331	467.743	6
WellS	24	10125	241.904	737.043	701.616	4717015	465.878	3
WellS	25	13335	258.904	745.241	1280.17	4471693	335.335	1
WellS	26	8879	275.459	737.97	258.756	4494983	506.249	2
WellS	27	11624	257.439	778.074	1116.26	4199641	361.291	4
WellS	28	11504	231.565	809.338	1010.64	1654025	143.778	4
WellS	29	16679	430.707	820.865	420.542	2575672	154.426	0
WellS	30	9959	220.971	841.436	1445.09	4574439	459.327	1
WellS	31	11836	236.417	875.37	812.085	6814372	575.733	1
WellS	32	14083	206.363	907.355	1162.84	1951962	138.604	1
WellS	33	9899	273.772	926.829	657.453	3560114	359.644	2
WellS	34	11887	232.682	982.822	950.506	2067438	173.924	4
WellS	35	16025	300.804	998.329	358.315	8155843	508.945	0
WellS	36	11417	305.266	994.287	581.598	6298154	551.647	6
WellS	37	7022	323.912	998.246	2010.36	2980621	424.469	2
WellS	38	9697	241.235	1057	1537.78	4472631	461.239	2
WellS	39	9994	288.934	1079.81	727.991	5941322	594.489	4
WellS	40	8516	292.674	1067.63	857.695	3719892	436.812	5
WellS	41	14110	207.955	1153.79	1049	3591142	254.51	2
WellS	42	13032	243.265	1157.3	600.523	6855760	526.071	0
WellS	43	8946	301.881	1146.94	834.268	4424449	494.573	3
WellS	44	13724	339.255	1220.41	452.842	3077730	224.259	1
WellS	45	8590	238.015	1232.27	1331.18	3348506	389.814	1
WellS	46	9045	286.78	1268.34	914.741	1580650	174.754	2
WellS	47	9798	293.402	1270.49	797.693	2122469	216.623	3
WellS	48	10172	256.833	1337.8	992.318	4220641	414.927	1
WellS	49	12701	317.859	1355.89	719.68	6580059	518.074	1
WellS	50	9109	236.474	1375.38	1266.71	3503747	384.647	0
WellS	51	10986	266.224	1386	587.063	3982349	362.493	0
WellS	52	14194	310.198	1457.71	905.43	8085929	569.672	3
WellS	53	9639	237.191	1561.11	1306.92	4203856	436.13	2
WellS	54	12055	375.51	1566.84	785.059	8333674	691.304	1
WellS	55	15891	292.551	1580.43	1056.54	8040942	506.006	3
WellS	56	8495	246.064	1605.13	1471.22	3865555	455.039	0
WellS	57	15933	280.752	1738.39	1195.29	7511821	471.463	1
WellS	58	9799	327.391	1746.47	154.027	5440194	555.178	0
WellS	59	13131	321.623	1788.44	1045.92	8562449	652.079	1
WellS	60	9895	202.424	1971.36	312.821	4124820	416.859	1
WellS	61	12359	307.667	1983.57	1325.99	7408008	599.402	0
WellS	1	8527	245.444	150.624	34.9511	2560225	300.249	2
WellS	2	10169	203.831	234.757	1270.32	3699177	363.77	0
WellS	3	9116	213.823	248.435	1537.09	3361285	368.724	0
WellS	4	11436	296.968	473.479	1664.73	4805533	420.211	3
WellS	5	12802	258.479	503.144	1501.66	4778014	373.224	1
WellS	6	10721	321.99	527.483	1850.45	4306476	401.686	0
WellS	7	13064	272.057	681.403	1525.99	5019603	384.232	3
WellS	8	11368	251.294	713.367	1309.24	4365365	384.005	3
WellS	9	8249	227.85	750.687	1650.17	2734554	331.501	0
WellS	10	8969	225.168	1006.1	1458.51	3724585	415.273	2
WellS	11	8761	245.711	1092.32	1275.88	4727362	539.592	0
WellS	12	9845	216.978	1260.53	1516.52	1277808	129.793	1
WellS	13	7817	273.667	1347.64	117.924	4745027	607.014	0
WellS	15	12338	280.241	1457.63	1380.18	4858704	393.8	1
WellS	16	12453	211.315	1838.81	1501.22	1663721	133.6	3
WellS	17	11843	339.378	1975.81	1256.53	6670090	563.209	0
WellS	18	8289	344.9	2008.88	1629.76	6053032	730.249	0
WellS	19	7449	318.914	2010.92	1043.14	1149806	154.357	2
WellS	2	5404	250.571	34.3412	1853.39	1852443	342.791	0
WellS	3	6752	216.089	67.2253	2006.64	878172	130.061	1
WellS	4	11444	309.361	97.6642	962.476	5138102	448.978	5
WellS	5	8287	225.28	118.189	1701.72	2887696	348.461	0
WellS	6	12697	303.908	196.631	874.41	6129644	482.763	1
WellS	7	7219	237.371	243.811	1190.24	2470080	342.164	1
WellS	8	10411	297.377	259.455	670.955	5013571	481.565	1
WellS	9	12158	314.814	317.571	938.579	5006459	411.783	3
WellS	10	9729	223.328	315.839	1608.79	3910310	401.923	2
WellS	11	9857	333.656	429.412	824.869	4377966	444.148	2
WellS	12	12302	204.107	455.462	1152.37	4523113	367.673	1
WellS	13	10369	264.524	487.354	1005.5	5295779	510.732	1
WellS	14	11166	231.488	520.308	1363.91	4227336	378.59	1
WellS	15	6684	252.932	526.477	1585.09	3197690	478.41	1
WellS	17	8321	250.407	622.824	1132.6	3172667	381.284	0
WellS	18	13077	321.47	648.573	680.564	5378456	411.291	1
WellS	19	7158	259.058	654.4	1291.35	2749353	384.095	1
WellS	20	6496	234.871	711.41	2012.54	952677	146.656	0
WellS	21	8268	273.658	697.112	488.198	5264333	636.712	2
WellS	22	8372	277.998	788.632	547.676	3732473	445.828	0
WellS	23	5987	409.199	888.225	2018.44	5901874	985.782	0
WellS	24	7392	305.776	1001.48	730.826	3597215	486.636	1
WellS	25	25339	433.871	1198.49	1636.49	3550313	140.113	0
WellS	26	11025	211.104	1308.18	1794.4	4178468	378.999	2
WellS	27	10016	223.864	1482.94	1733.35	4311466	430.458	5
WellS	28	7980	254.711	1509.4	1511.11	4182274	524.094	0
WellS	29	8664	281.713	1592.21	1138.56	5310143	612.897	0
WellS	30	7651	271.591	1637.89	293.777	4364195	570.408	1
WellS	31	6124	289.268	1780.17	2007.86	3600462	587.927	0
WellS	32	7027	305.857	1885.23	1593.83	4203811	598.237	0
WellS	33	6196	293.68	1947.35	2009.1	1236108	199.501	2
WellS	34	7779	263.34	2005.84	1923.7	1182237	151.978	1
WellS	35	6830	296.908	2016.36	1536.19	4316250	631.955	0
WellS	3	11094	304.618	210.665	721.236	5652081	509.472	0
WellS	4	10268	190.902	220.287	127.969	3513916	342.22	2
WellS	5	9958	204.735	221.46	278.184	1266514	127.186	2
WellS	6	12024	296.078	281.476	871.367	5172116	430.149	1
WellS	7	10753	282.813	279.537	1295.7	3923846	364.907	0
WellS	8	8820	349.322	368.424	99.4066	4363523	494.73	0
WellS	9	12048	317.024	483.219	630.324	5706539	473.65	1
WellS	10	9143	242.444	545.753	845.853	5091950	556.923	2
WellS	11	9285	237.423	538.088	467.113	3655725	393.724	1
WellS	12	9163	201.541	612.925	54.7591	1184800	129.303	1
WellS	14	8100	237.428	748.79	94.9185	1200708	148.236	0
WellS	15	10686	261.954	789.763	817.718	5116165	478.773	3
WellS	16	6951	281.495	852.129	1173.12	3919732	563.909	1
WellS	18	9838	288.618	936.748	297.928	4909463	499.031	0
WellS	19	12042	287.659	1206.39	365.206	6267740	520.49	2
WellS	21	16618	380.461	1318.74	199.227	5490622	330.402	1
WellS	23	6228	377.055	1336.44	475.996	4423610	710.278	0
WellS	24	11097	349.078	1385.58	583.179	6345777	571.846	2
WellS	25	6870	331.596	1365.84	324.858	4450441	647.808	0
WellS	26	9552	369.971	1381.94	1732.18	6139225	642.716	0
WellS	27	6360	342.743	1437.78	424.138	4406195	692.798	0
WellS	28	7475	277.184	1464.73	1651.73	2967217	396.952	0
WellS	29	13758	535.132	1529.57	1894.86	6908864	502.171	0
WellS	30	8720	267.893	1558.63	1696.02	3301124	378.569	2
WellS	31	23117	368.307	1670.99	1636.65	15544674	672.435	1
WellS	32	6204	399.209	1699.15	1350.89	1434816	231.273	0
WellS	33	14203	328.849	1774.51	1767.23	6817398	479.997	5
WellS	35	6033	391.894	1783.64	1383.06	1275023	211.341	0
WellS	36	6354	324.582	1822.63	442.485	1070855	168.532	0
WellS	37	6368	294.057	1941.08	457.23	986327	154.888	0
WellS	1	9017	258.78	140.696	1802.03	4175539	463.074	1
WellS	2	9989	202.269	303.229	1416.93	1251811	125.319	3
WellS	3	8183	229.392	304.472	1088.18	3874346	473.463	1
WellS	4	10065	346.166	425.436	1991.53	5333020	529.858	3
WellS	5	21114	252.853	473.496	1695.82	6239395	295.51	2
WellS	6	10761	206.565	488.13	1407.7	3962722	368.248	0
WellS	7	11907	297.357	551.746	1918.19	4972424	417.605	4
WellS	8	10645	229.129	610.92	1390.95	4715654	442.992	1
WellS	9	7479	266.287	627.989	399.034	3472956	464.361	0
WellS	11	7008	294.181	707.738	588.237	3771614	538.187	0
WellS	12	15033	259.783	747.553	1920.82	5091182	338.667	1
WellS	13	11567	292.466	755.069	1508.53	5059010	437.366	0
WellS	14	17135	243.558	914.305	1778.79	5874570	342.84	4
WellS	15	9668	420.909	879.297	674.974	6431104	665.195	2
WellS	16	14352	276.283	927.904	1919.34	5550601	386.748	1
WellS	17	11785	459.544	1048.77	708.39	8961605	760.425	0
WellS	18	10511	309.896	1106.23	1749.58	4455636	423.902	1
WellS	19	11139	438.466	1119.57	802.481	7780013	698.448	0
WellS	20	10421	247.592	1105.97	1958.05	5068996	486.421	2
WellS	22	12229	301.077	1237.25	1905.76	5077503	415.202	0
WellS	23	17393	508.546	1281.08	974.96	13635167	783.946	0
WellS	24	12260	295.694	1443.84	1811.73	4583753	373.879	1
WellS	25	8712	253.618	1518.14	1519.66	4370080	501.616	2
WellS	26	10073	226.903	1583.68	1688.25	3651969	362.55	2
WellS	27	8551	258.968	1674.55	1168.59	5145225	601.71	4
WellS	28	9932	234.026	1727.93	1331.88	4319335	434.891	1
WellS	29	8648	248.282	1738.01	375.825	5131378	593.36	2
WellS	30	12732	303.193	1787.17	1634.45	5748890	451.531	2
WellS	31	9272	252.594	1878.37	1164.36	4283315	461.962	0
WellS	32	5363	234.749	1913.53	2014.54	2117344	394.806	0
WellS	33	15989	274.521	1958.53	1041.52	7879516	492.809	2
WellT	1	12132	239.319	55.0092	843.476	5936774	489.348	0
WellT	4	13254	251.802	201.699	814.078	7058820	532.58	2
WellT	5	14286	235.817	239.577	1051.27	6536818	457.568	0
WellT	6	13819	252.581	312.902	608.256	8195839	593.085	2
WellT	7	10512	294.64	330.81	855.885	5897425	561.018	0
WellT	8	10443	321.321	532.647	1084.59	9245732	885.352	0
WellT	9	11769	312.384	668.156	461.4	8727369	741.556	0
WellT	10	7437	252.389	670.799	984.191	4667717	627.634	0
WellT	11	7666	254.551	794.228	1072.17	5020963	654.965	0
WellT	12	11605	326.857	829.892	620.912	7385627	636.418	1
WellT	13	10935	382.381	845.585	761.681	10955513	1001.88	0
WellT	14	9971	387.314	911.557	926.913	12803174	1284.04	0
WellT	15	12752	291.985	948.03	1152.72	10018620	785.651	1
WellT	16	9295	480.629	1164.38	1074.54	19876758	2138.44	0
WellT	17	9788	325.84	1237.13	959.172	7759670	792.774	5
WellT	18	14703	318.65	1320.2	855.057	11784870	801.528	0
WellT	19	9663	352.226	1316.49	1455.64	13180492	1364.02	0
WellT	20	6602	428.02	1341.73	2005.08	8767142	1327.95	0
WellT	21	12186	360.324	1411.62	1012.06	8477085	695.641	0
WellT	22	9844	253.949	1409.89	1126.63	2091237	212.438	3
WellT	23	12575	370.191	1467.8	866.283	9602273	763.6	1
WellT	24	12340	366.628	1523.7	695.854	13449699	1089.93	1
WellT	25	10997	327.214	1561.3	215.889	9647180	877.256	2
WellT	26	18948	329.883	1590.54	1123.87	16578797	874.963	0
WellT	27	9870	268.025	1601.17	968.601	5281325	535.089	0
WellT	28	8825	271.445	1677.33	880.185	6077025	688.615	0
WellT	29	25124	293.6	1738.77	1816.88	14767542	587.786	1
WellT	30	8608	264.867	1716.24	1086.87	6598416	766.545	0
WellT	31	12138	282.631	1839.81	1967.38	6599443	543.701	0
WellT	32	13081	284.43	1846.39	1567.77	9161845	700.393	1
WellT	33	12384	303.978	1892.38	1091.12	9513437	768.204	0
WellT	34	9605	223.108	1934.08	1326.19	6238256	649.48	0
WellT	35	14163	264.83	1989.8	1718.08	7192055	507.806	0
WellT	36	9406	220.903	2002.78	1860.32	5218818	554.839	0
WellT	1	10561	263.963	267.276	884.629	7271413	688.516	0
WellT	2	10848	275.174	296.657	695.641	7159242	659.96	1
WellT	3	12460	280.796	457.101	950.898	8544507	685.755	0
WellT	4	11576	326.575	508.162	538.941	10878206	939.721	0
WellT	5	5004	228.453	538.235	2016.28	1505155	300.79	1
WellT	6	10626	202.778	588.315	1909.62	4867452	458.07	4
WellT	7	9622	197.841	663.696	1788.15	4418837	459.243	2
WellT	8	9653	200.01	730.966	1948.57	4007474	415.153	2
WellT	10	12245	304.504	1551.52	424.192	10915481	891.424	1
WellT	11	11407	335.333	1772.24	634.988	10489469	919.564	1
WellT	1	12470	251.68	62.9909	1597.89	7388857	592.531	0
WellT	2	11653	230.909	47.3092	1940.39	7785610	668.121	0
WellT	3	13671	239.514	93.0629	1445.49	8059314	589.519	3
WellT	4	9568	194.156	192.98	1698.27	3853160	402.713	0
WellT	5	7191	219.056	245.443	1318.35	3262069	453.632	0
WellT	6	8443	206.507	283.933	1869.81	3498280	414.341	0
WellT	7	13127	237.799	363.879	1527.68	7471689	569.185	1
WellT	8	8790	206.677	375.448	1321.95	4746135	539.947	1
WellT	10	8779	221.605	674.461	205.707	3089433	351.912	3
WellT	11	9555	213.093	791.856	80.2065	5335882	558.439	0
WellT	12	12278	343.237	879.85	701.034	12121219	987.231	2
WellT	13	8095	237.928	990.151	1736.7	4475121	552.825	1
WellT	14	23393	267.973	1146.73	1785.98	14215792	607.694	1
WellT	15	12207	266.055	1328.3	1607.01	8128971	665.927	2
WellT	16	11971	210.595	1419.46	868.339	8869286	740.898	0
WellT	17	11749	206.602	1479.32	541.801	6928020	589.669	0
WellT	18	11149	199.436	1574.91	353.579	6536523	586.288	0
WellT	19	14203	185.118	1720.23	578.883	8088924	569.522	1
WellT	20	9085	224.834	1756.81	1754.44	5810173	639.535	1
WellT	21	8961	221.091	1992.3	1633.61	6287553	701.658	1
WellT	1	8146	178.085	43.5475	302.405	3499015	429.538	0
WellT	2	9032	182.038	81.0644	203.445	1542458	170.777	0
WellT	3	12178	273.008	83.2466	1716.8	10722080	880.447	0
WellT	4	8939	188.142	96.8718	1263.08	3882316	434.312	0
WellT	5	13704	165.924	240.267	503.492	6084360	443.984	0
WellT	6	7956	203.358	397.414	1426.78	3386107	425.604	0
WellT	7	13404	179.65	412.279	516.454	6330927	472.316	1
WellT	8	10197	187.046	652.688	1774.9	4454949	436.888	0
WellT	9	10432	276.693	672.346	1564.8	2942372	282.053	0
WellT	10	8095	223.41	721.941	1083.84	4680016	578.137	1
WellT	11	10335	273.636	764.588	1902.97	4554202	440.658	0
WellT	12	7972	236.12	826.337	954.553	4887161	613.041	0
WellT	13	10169	192.174	886.697	1737.43	4705099	462.69	0
WellT	14	5591	270.091	874.421	1539.4	3233488	578.338	0
WellT	15	7154	270.856	884.052	728.861	5513510	770.689	1
WellT	16	7071	291.522	896.117	589.409	7152030	1011.46	0
WellT	17	12034	266.021	926.09	1422.21	8029300	667.218	1
WellT	18	5371	277.045	931.536	1607.05	2955458	550.262	0
WellT	19	20235	200.437	1042.69	1897.84	9393680	464.229	1
WellT	20	11892	375.39	1016.62	822.826	17624462	1482.04	0
WellT	21	9735	213.666	1021.21	1501.26	4505178	462.782	1
WellT	22	8737	215.304	1027.51	1634.32	4275471	489.352	2
WellT	23	10708	201.032	1038.69	1270.95	5616528	524.517	2
WellT	24	15779	222.991	1169.02	1593.38	7508929	475.881	1
WellT	25	9998	197.957	1140.74	1702.82	4394218	439.51	1
WellT	26	11560	205.551	1125.57	1461.3	5741535	496.673	0
WellT	27	10741	337.891	1193.15	931.611	7805295	726.682	0
WellT	28	13652	180.968	1322.6	1796.11	6094401	446.411	3
WellT	29	12222	259.482	1316.74	1461.95	8156746	667.382	1
WellT	30	10408	201.46	1386.82	1675.38	5780385	555.379	0
WellT	31	12042	215.749	1497.25	1559.53	6306118	523.677	0
WellT	32	22339	204.258	1648.79	1893.03	10799415	483.433	8
WellT	33	11951	228.98	1713.6	1703.14	6023079	503.981	1
WellT	34	5779	214.229	1713.49	2019.65	3152765	545.555	0
WellT	35	9264	238.845	1751.39	823.061	6340139	684.385	0
WellT	36	11119	270.634	1837.77	932.596	6879772	618.74	1
WellT	37	9065	220.246	1855.16	485.574	5549877	612.231	0
WellT	38	8419	227.254	1859.18	1777.74	5480762	650.999	1
WellT	39	21027	220.459	1897.48	712.448	12332472	586.506	3
WellT	40	11299	196.215	1969.25	1938.2	5422581	479.917	4
WellT	41	9132	223.313	1994.54	493.478	6646556	727.831	0
WellT	42	11570	215.586	1998.06	911.382	6582370	568.917	1
WellT	43	10552	260.061	1998.84	1054.14	6598985	625.378	1
WellT	45	5369	220.967	2013.5	1855.94	3371885	628.028	0
WellT	46	7152	280.59	2017.24	602.301	4844264	677.33	0
WellT	1	6052	203.841	32.6355	1545.41	2668786	440.976	0
WellT	3	18583	212.273	86.5135	1791.9	7766698	417.946	2
WellT	4	16620	349.316	143.416	603.234	14539986	874.849	0
WellT	5	9628	197.877	152.482	1956.18	4403527	457.367	0
WellT	6	8834	208.35	229.324	1726.81	4037634	457.056	0
WellT	7	8963	209.489	319.534	1574.3	4909125	547.71	1
WellT	8	29392	246.196	524.391	1701.84	13429501	456.91	0
WellT	9	11133	272.931	402.954	1138.81	6499066	583.766	1
WellT	10	7813	233.093	497.49	1605.85	4171186	533.878	0
WellT	11	11269	300.771	552.76	390.47	7631579	677.219	2
WellT	12	11145	304.669	567.751	1511.83	8405705	754.213	0
WellT	13	7804	241.797	632.89	1426.14	4601974	589.694	0
WellT	14	12425	266.69	684.344	1827.52	7178376	577.736	1
WellT	15	7984	234.691	674.396	1333.57	4744975	594.31	0
WellT	16	12662	275.598	697.501	1580.39	7340218	579.704	1
WellT	17	11065	214.496	774.474	65.544	6691387	604.734	1
WellT	18	5899	266.478	849.139	1538.97	2819510	477.964	0
WellT	19	12227	271.067	945.811	1640.22	7872286	643.844	1
WellT	20	5863	271.016	936.204	1499.02	3082655	525.781	0
WellT	21	12119	251.197	1747.05	1212.16	9043939	746.261	3
WellT	22	10536	251.839	1814.86	1045.28	6899815	654.88	1
WellT	23	11600	321.573	1937.75	1719.62	11759630	1013.76	0
WellT	24	11036	233.093	1990.82	1213.03	6116703	554.25	3
WellT	1	9220	274.203	49.3754	1334.31	5356717	580.989	0
WellT	2	11375	308.22	251.257	333.78	7515478	660.701	0
WellT	3	13842	333.208	776.246	959.773	13827732	998.969	0
WellT	4	9312	218.296	759.765	1978.14	5210759	559.575	0
WellT	5	9709	251.827	898.516	902.763	7980857	822.006	1
WellT	6	10301	211.638	965.479	1917.33	6050613	587.381	0
WellT	8	6699	279.419	1104.5	2012.04	3943180	588.622	0
WellT	9	12525	216.889	1557.24	626.536	2103520	167.946	1
WellT	10	9856	227.78	1558.9	1699.03	7000683	710.297	0
WellT	11	12657	322.692	1774.04	391.794	10563716	834.615	0
WellT	12	14234	313.923	1787.1	720.533	11905617	836.421	0
WellT	1	8628	178.671	42.7964	785.101	3934109	455.97	1
WellT	2	11696	183.167	121.245	678.779	2632792	225.102	0
WellT	3	11231	180.615	103.259	1727.06	4028736	358.716	3
WellT	4	7912	367.949	197.117	431.837	9960172	1258.87	0
WellT	5	39272	241.833	293.767	807.114	17864091	454.881	2
WellT	6	35787	261.489	346.043	1496.03	19591777	547.455	1
WellT	7	9488	204.042	227.458	1000.44	4697500	495.099	0
WellT	8	9711	198.15	240.933	1867.07	4766836	490.87	3
WellT	9	11380	229.606	256.224	1665.73	5259021	462.128	2
WellT	10	15875	230.949	321.156	1196.79	2763943	174.107	0
WellT	11	8503	227.327	336.534	1047.39	4659070	547.932	0
WellT	12	9992	198.581	352.557	1747.47	4081265	408.453	0
WellT	13	12836	336.391	363.342	1984.64	8132047	633.534	0
WellT	14	10355	324.337	375.6	544.297	7074349	683.182	2
WellT	15	9220	208.669	392.671	1626.7	3820932	414.418	0
WellT	16	12462	244.372	424.115	973.321	7199777	577.738	1
WellT	17	14011	247.781	435.755	1310.24	7780124	555.287	0
WellT	18	8757	255.244	458.121	625.676	6047210	690.557	0
WellT	19	23080	342.853	496.986	459.742	20913908	906.149	0
WellT	20	11051	230.055	494.932	1088.91	5468994	494.887	1
WellT	21	17504	245.787	511.211	788.04	11050323	631.303	1
WellT	22	20685	197.141	526.722	1888.68	9924445	479.789	1
WellT	23	10870	193.133	560.482	1592.51	1939752	178.45	1
WellT	24	8772	341.274	574.959	122.66	9330591	1063.68	0
WellT	25	9527	225.385	593.421	914.052	1894680	198.875	0
WellT	26	15039	266.017	611.286	1260.26	7048173	468.66	3
WellT	27	9151	201.973	600.945	1731.41	3613464	394.871	1
WellT	28	50246	285.965	796.458	655.156	30961854	616.205	1
WellT	29	10703	214.531	630.477	287.017	6202399	579.501	0
WellT	30	11242	203.731	638.834	1486.39	4213035	374.758	1
WellT	31	15481	250.601	671.669	1056.63	7436868	480.387	2
WellT	32	9144	244.921	642.904	471.717	2075357	226.964	0
WellT	33	10447	216.323	670.521	147.021	6636594	635.263	0
WellT	34	8948	256.815	706.461	383.734	4879167	545.28	0
WellT	35	11779	183.37	722.142	1632.63	3978430	337.756	0
WellT	36	11307	244.613	729.092	853.987	6327432	559.603	1
WellT	37	7530	231.407	726.638	1420.63	1411960	187.511	1
WellT	38	9586	200.69	749.794	1805.7	3888312	405.624	0
WellT	39	14088	260.55	793.229	1244.7	7809447	554.333	0
WellT	40	10342	195.37	787.018	1914.54	4545251	439.494	1
WellT	41	11073	215.118	796.345	289.068	5280105	476.845	1
WellT	42	25211	301.931	866.804	466.335	15110852	599.375	3
WellT	43	9928	279.067	813.726	792.151	6349222	639.527	0
WellT	44	12978	290.036	835.938	1038.68	7846119	604.571	0
WellT	45	8911	224.469	846.544	1347.15	4876674	547.265	0
WellT	46	15016	241.692	861.708	89.9146	8358131	556.615	0
WellT	47	13349	279.736	949.323	1170.74	8822407	660.904	0
WellT	48	10052	230.419	953.968	235.61	2123429	211.244	4
WellT	49	10081	207.295	948.602	1457.96	4713038	467.517	0
WellT	50	11752	311.293	982.198	966.391	12292043	1045.95	1
WellT	51	11525	284.893	990.65	57.8704	8074995	700.65	0
WellT	52	9779	206.441	1011.47	1951.55	4775765	488.369	0
WellT	53	17983	265.009	1032.21	350.065	3276059	182.175	1
WellT	55	12643	270.556	1042.12	1390.15	6605918	522.496	1
WellT	56	17030	320.93	1100.87	189.63	11725603	688.526	0
WellT	57	11702	228.993	1073.2	579.745	6158786	526.302	1
WellT	58	13080	304.247	1104.79	864.535	15396486	1177.1	1
WellT	60	6099	278.553	1111.02	29.1848	3971544	651.18	0
WellT	61	9116	259.248	1117.98	417.328	1575076	172.781	3
WellT	62	13271	245.172	1149.48	1095.18	7563166	569.902	0
WellT	63	15079	254.79	1142.66	1319.17	7476229	495.804	0
WellT	64	12468	273.664	1160.23	977.744	8303856	666.013	0
WellT	65	13742	258.901	1171.84	1866.08	6798514	494.725	2
WellT	66	14123	182.898	1174.79	1521.52	6210707	439.758	13
WellT	67	5327	298.555	1197	93.2517	4146995	778.486	0
WellT	68	12916	227.179	1219.97	523.327	6593103	510.46	2
WellT	69	9355	221.658	1266.43	1280.34	4773745	510.288	0
WellT	70	7912	268.549	1272	365.502	4757053	601.245	1
WellT	71	12746	261.133	1299.52	1797.72	6943738	544.778	5
WellT	72	11940	209.468	1288.91	1924.03	2125448	178.011	3
WellT	73	13610	254.538	1316.83	920.165	8458533	621.494	3
WellT	74	9767	223.34	1352.98	1171.66	5151542	527.444	2
WellT	75	7759	294.094	1337.99	506.027	3996674	515.102	1
WellT	76	10060	256.423	1352.17	638.182	5756615	572.228	2
WellT	77	8222	273.437	1371.01	415.124	1880281	228.689	2
WellT	78	11671	309.393	1454.72	1873.49	8273452	708.89	0
WellT	79	18069	270.224	1483.1	550.907	6828048	377.887	1
WellT	80	8678	247.742	1468.28	355.691	6683244	770.136	0
WellT	81	13305	297.16	1491	1086.23	8642420	649.562	1
WellT	82	21760	248.689	1537.62	709.013	13022421	598.457	2
WellT	83	14947	237.143	1510.82	934.542	8719191	583.341	3
WellT	85	11358	210.052	1610.45	1705.89	3678155	323.838	1
WellT	86	7938	259.614	1611.93	464.37	5289358	666.334	0
WellT	87	10335	254.421	1652.03	582.671	8038418	777.786	3
WellT	88	9415	260.138	1666.5	1104.22	7524700	799.225	2
WellT	89	10627	237.487	1707.56	689.769	7753427	729.597	3
WellT	90	9399	226.986	1877.07	756.37	3990411	424.557	0
WellT	1	6465	242.161	27.5357	610.987	3261763	504.526	0
WellT	4	22041	234.626	83.0181	833.007	10618442	481.759	0
WellT	5	6416	190.75	61.2067	2015.99	2822439	439.906	0
WellT	6	8977	206.516	97.7064	516.159	4568890	508.955	0
WellT	7	9825	197.146	112.378	1239.36	4169842	424.411	1
WellT	8	6940	234.984	106.227	1032.87	1154045	166.289	1
WellT	9	14365	244.567	169.125	703.085	8264351	575.312	0
WellT	10	10739	274.586	218.8	1970.66	5199913	484.208	0
WellT	11	5914	261.311	197.736	1061.35	954914	161.467	0
WellT	12	6823	221.911	243.594	248.228	3913602	573.59	0
WellT	13	15077	243.106	282.291	854.997	7819156	518.615	1
WellT	14	8169	222.931	258.959	597.539	4300345	526.422	0
WellT	15	8220	227.989	311.61	991.969	4231661	514.801	1
WellT	16	8624	213.751	313.39	1114.05	4057537	470.494	0
WellT	17	9653	201.021	327.54	1273.11	4032284	417.723	1
WellT	18	10542	208.797	335.937	754.743	5047093	478.76	3
WellT	19	7835	210.469	349.944	131.659	3942249	503.159	0
WellT	21	6880	244.511	383.16	585.879	3931907	571.498	1
WellT	22	11528	203.457	414.453	916.51	5724821	496.601	3
WellT	23	10146	203.589	459.911	1132.11	4468130	440.383	0
WellT	24	8212	234.7	471.019	771.11	3954818	481.59	0
WellT	25	9293	219.111	511.24	1017	4711171	506.959	0
WellT	26	9858	217.86	565.414	869.642	4894437	496.494	0
WellT	27	8760	237.447	580.95	1947.75	5467096	624.098	0
WellT	28	8463	460.233	613.982	622.226	15381294	1817.48	0
WellT	29	8758	241.478	893.707	272.979	1506911	172.061	0
WellT	30	7980	251.415	1151.78	1057.82	6292176	788.493	0
WellT	31	10708	200.033	1211.21	66.438	1730894	161.645	0
WellT	32	7062	258.095	1277.69	1654.98	4270311	604.689	2
WellT	33	7555	235.341	1310.41	1498.21	3749822	496.336	3
WellT	34	7186	263.538	1464.29	1597.86	4369114	608.004	1
WellT	35	13318	295.362	1482.93	1043.36	10472740	786.36	2
WellT	36	8103	305.475	1486.71	42.7021	6366146	785.653	1
WellT	37	13409	279.074	1606.6	1308.36	8433728	628.96	0
WellT	38	9190	267.604	1653.03	899.453	1542718	167.869	3
WellT	39	14756	276.995	1675.31	1208.93	10183468	690.124	4
WellT	40	24087	220.824	1757.14	1042.29	4581753	190.217	2
WellT	41	12156	265.2	1842.99	821.052	8693485	715.16	4
WellT	42	23739	305.086	1898.02	1203.34	14952628	629.876	2
WellT	43	13464	302.828	1871.07	1092.78	9213354	684.295	2
WellT	44	8250	334.63	1940.4	163.621	12326076	1494.07	0
WellT	45	10398	267.719	1980.3	1012.79	1714913	164.927	2
WellT	1	11221	188.22	82.7756	1009.29	4739554	422.382	1
WellT	2	11217	212.448	148.606	797.146	5773380	514.699	1
WellT	3	11119	197.114	181.288	1130.97	4517724	406.307	1
WellT	4	14898	272.57	188.183	1335.69	8127009	545.51	2
WellT	5	14482	488.669	239.066	325.392	22351220	1543.38	0
WellT	6	11971	206.696	261.721	973.216	5377599	449.219	2
WellT	7	11889	196.522	322.471	827.017	6159697	518.101	0
WellT	8	10069	205.468	321.134	651.383	5411902	537.482	0
WellT	9	17629	300.713	358.715	1163.55	11306835	641.377	1
WellT	10	8950	323.487	531.716	1611.62	7332075	819.226	0
WellT	11	29551	323.038	613.029	995.898	19693061	666.409	4
WellT	12	12524	309.704	596.205	703.18	9769092	780.03	3
WellT	13	13088	301.063	721.87	822.007	8278784	632.548	1
WellT	14	25190	288.649	796.065	617.192	18528284	735.541	1
WellT	15	12302	276.825	767.439	1055.65	7736313	628.866	0
WellT	16	10926	334.208	798.167	367.502	8072688	738.851	1
WellT	17	9867	249.581	843.958	1266.25	6442795	652.964	2
WellT	18	23994	304.805	935.337	995.604	15617740	650.902	3
WellT	19	10405	337.462	904.373	827.151	7635652	733.844	2
WellT	20	10420	288.528	908.308	726.348	8324907	798.935	2
WellT	21	13661	291.494	961.353	1174.06	8615205	630.642	2
WellT	22	10521	347.186	963.135	356.854	9043622	859.578	0
WellT	23	14423	320.67	993.46	550.662	12183692	844.74	2
WellT	24	9371	210.048	1001.76	1514.19	4668956	498.235	2
WellT	25	10899	265.846	1002.26	881.031	7054577	647.268	1
WellT	26	9436	224.02	1057.17	1397.18	4885128	517.712	0
WellT	27	8964	318.101	1111.01	382.801	7558199	843.173	0
WellT	28	12111	323.905	1157.58	931.109	9339525	771.161	1
WellT	29	24255	311.557	1165.9	1218.02	17673680	728.661	2
WellT	30	13669	314.35	1173.74	1051.21	8272028	605.167	1
WellT	31	14005	302.548	1169.95	593.209	12577956	898.105	2
WellT	32	21376	283.776	1237.84	1418.95	13513089	632.162	0
WellT	33	10025	351.735	1277.62	1244.42	9165561	914.27	1
WellT	34	10109	354.135	1273.78	513.844	9505398	940.291	3
WellT	35	9891	294.548	1350.47	1014.14	9557222	966.254	3
WellT	36	16011	538.049	1413.23	900.375	17581829	1098.11	0
WellT	37	9602	256.692	1408.32	1152.78	2169935	225.988	1
WellT	38	10707	352.651	1482.71	1285.89	8714150	813.874	0
WellT	39	9345	224.776	1577.19	1443.23	5525520	591.281	0
WellT	41	9283	261.717	1992.8	52.7447	7181931	773.665	0
WellT	42	6298	322.032	2018.92	237.865	5757851	914.235	0
WellT	1	7617	328.811	44.1805	482.358	6238458	819.018	0
WellT	2	5971	253.964	217.7	366.743	3761797	630.011	1
WellT	3	6282	238.91	229.104	213.815	3506612	558.2	1
WellT	4	12599	243.885	291.947	1253.04	8076870	641.072	4
WellT	6	9078	212.596	854.369	1465.18	4375494	481.989	0
WellT	7	11887	270.119	919.557	1715.3	6024704	506.831	0
WellT	8	8959	222.657	925.91	1949.8	4232572	472.438	2
WellT	9	9072	217.878	945.793	1406.67	4512325	497.39	1
WellT	10	12094	303.66	1035.35	1190.3	8838111	730.785	0
WellT	11	8995	222.352	1133.42	1465.34	5479823	609.208	2
WellT	12	10806	357.914	1273.05	1106.5	12498534	1156.63	0
WellT	13	13702	325.683	1293.34	775.562	15799111	1153.05	2
WellT	14	9273	283.809	1279.64	561.859	7916775	853.745	2
WellT	15	9637	342.59	1366.07	1419.84	7790546	808.4	0
WellT	16	9470	244.006	1400.59	1111.16	6852371	723.587	2
WellT	17	7709	309.096	1682.34	720.369	7544656	978.682	1
WellT	18	7923	247.978	1926.93	1721.28	4537153	572.656	0
WellT	19	9555	218.018	1989.08	1936.78	4853621	507.967	0
WellT	1	11156	274.543	201.352	204.241	1903849	170.657	0
WellT	2	15438	177.765	262.197	1452.08	2909535	188.466	0
WellT	3	9376	201.612	331.506	1633.76	4552800	485.58	0
WellT	4	7579	233.349	372.972	1314.58	4036895	532.642	0
WellT	5	11811	297.365	426.457	1203.24	8095467	685.418	0
WellT	6	9391	206.94	442.875	1563.94	4409478	469.543	1
WellT	7	9411	207.245	496.146	1689.49	4258747	452.529	2
WellT	8	17592	238.934	505.265	1352.84	9499661	539.999	2
WellT	9	9113	389.205	534.758	984.93	13182756	1446.59	0
WellT	10	9383	204.76	545.492	1844.98	4079236	434.748	0
WellT	11	14001	237.009	579.625	1594.95	6839580	488.507	7
WellT	12	21252	246.221	610.332	1208.87	12855288	604.898	3
WellT	14	9490	208.636	732.458	1849.89	4300745	453.187	2
WellT	15	16262	233.423	774.866	1603.9	8051539	495.114	1
WellT	16	8379	403.845	727.165	1131.39	9454841	1128.4	1
WellT	17	14465	258.358	763.655	1384.45	8159776	564.105	2
WellT	18	8178	238.871	782.868	1740.9	3987714	487.615	0
WellT	19	5561	235.659	791.927	28.0669	3529543	634.696	1
WellT	20	6660	270.127	839.449	1838.16	3718973	558.404	0
WellT	21	13305	216.327	859.982	1236.32	6347195	477.053	4
WellT	22	6539	276.041	921.391	1905.47	3589869	548.994	0
WellT	23	24303	237.393	1030.92	1489.92	12629444	519.666	3
WellT	24	9094	234.412	998.075	1344.36	5157458	567.128	0
WellT	26	9315	217.292	1042.09	1888.89	4330036	464.846	1
WellT	27	11089	197.601	1089.68	1702.69	6140091	553.71	0
WellT	28	12825	290.711	1089.61	1186.27	8558033	667.293	0
WellT	29	9162	239.037	1139.86	1344.77	5478372	597.945	0
WellT	30	10168	204.746	1206.19	1625.8	5505256	541.43	0
WellT	31	11403	204.012	1256.71	1360.3	6963910	610.709	0
WellT	32	11649	196.21	1367.9	1615.85	6279751	539.081	0
WellT	33	10585	331.312	1405.31	1129.49	9860957	931.597	0
WellT	34	10927	211	1502.74	1865.2	7163899	655.614	1
WellT	35	8654	234.107	1545.99	1350.12	4728961	546.448	0
WellT	36	8769	226.39	1550.6	1665.95	3458543	394.406	0
WellT	37	8178	240.363	1641.39	1466.53	3654133	446.825	0
WellT	38	9451	433.043	1702.55	995.035	16603433	1756.79	0
WellT	39	8329	257.284	1805.65	2008.98	5358467	643.351	3
WellT	40	14181	277.781	1820.37	1792.27	11312132	797.696	0
WellT	41	6992	274.413	1919.61	956.911	4130174	590.7	0
WellT	42	10534	228.82	1972.65	1996.47	5134477	487.419	3
WellT	43	6691	206.301	2018.11	145.473	3340016	499.18	0
WellT	1	5694	238.181	23.1921	1751.74	3037664	533.485	0
WellT	2	9954	239.29	97.5931	1945.98	6850818	688.248	2
WellT	3	21133	259.49	203.534	1775.18	9960356	471.318	3
WellT	5	9448	256.853	220.086	1938.99	5790215	612.851	4
WellT	6	9389	309.732	248.104	1203.66	7324017	780.064	0
WellT	7	9887	270.931	288.45	1669.37	4963963	502.07	3
WellT	9	8726	221.211	331.324	1852.56	3647379	417.99	1
WellT	10	9695	211.172	366.821	1953.59	4358924	449.605	1
WellT	11	17252	218.714	435.474	1661.76	7641777	442.95	1
WellT	12	9336	208.702	458.353	1799.52	3658886	391.912	0
WellT	13	8030	224.986	504.498	1957.42	3811087	474.606	0
WellT	15	8488	258.092	554.402	1407.72	4617672	544.024	3
WellT	16	8400	212.768	590.139	1743.94	4377267	521.103	0
WellT	17	11086	284.953	639.778	212.169	1962749	177.048	0
WellT	19	8843	206.352	684.105	1904.97	3731796	422.006	0
WellT	20	13507	277.085	845.266	92.3865	2366326	175.193	0
WellT	23	12490	268.168	1357.08	1979.53	7854965	628.9	0
WellT	24	10042	240.62	1709.94	141.658	6999664	697.039	0
WellT	25	11593	316.798	1789.14	352.553	9127717	787.347	0
WellT	27	11773	316.597	1849.42	1125.61	8199675	696.481	0
WellT	28	10639	339.526	1872.84	464.499	9280032	872.265	0
WellT	29	13245	210.766	1880.86	130.618	7279337	549.591	0
WellT	30	11999	316.647	1914.17	1317.38	8455183	704.657	1
WellT	31	11430	328.301	1938.33	654.928	12782946	1118.37	0
WellT	33	11935	290.047	1982.57	1102.88	8282495	693.967	2
WellT	34	10796	298.283	2001.43	1555.01	5536272	512.808	1
WellT	35	7177	232.433	2017.44	228.882	4232944	589.793	0
WellT	36	5533	280.953	2023.8	1222.8	3416055	617.397	0
WellT	37	5989	251.755	2025.37	923.41	3780768	631.285	0
WellT	3	21442	244.745	117.68	212.366	9577610	446.675	0
WellT	4	9626	329.443	130.171	421.785	5774955	599.933	1
WellT	5	5530	184.536	208.448	28.4476	2526900	456.944	0
WellT	6	8807	237.283	228.718	1131.08	5135820	583.152	2
WellT	8	5859	299.344	275.684	280.597	3397395	579.859	0
WellT	9	7326	231.268	300.688	104.225	1215114	165.863	3
WellT	10	8658	240.684	314.61	384.894	4156812	480.112	0
WellT	11	5738	311.483	326.394	208.405	4205518	732.924	1
WellT	12	7227	268.903	386.553	173.962	2538986	351.319	3
WellT	13	9192	241.186	447.816	288.346	4793875	521.527	2
WellT	14	9505	226.872	452.915	68.2147	4479927	471.323	1
WellT	15	15346	221.324	541.572	455.862	7935319	517.094	0
WellT	16	9460	238.484	521.166	177.355	4883728	516.25	2
WellT	17	9293	218.855	526.685	1504.7	5042293	542.59	2
WellT	18	9532	270.892	579.829	81.1875	4938604	518.108	2
WellT	19	8018	240.419	584.865	1392.86	4375648	545.728	1
WellT	20	9328	249.038	609.102	297.395	6090078	652.881	4
WellT	21	8514	247.393	660.595	1103.27	4901334	575.679	0
WellT	22	9830	235.83	691.063	1647.48	4546978	462.561	4
WellT	23	5370	282.572	683.157	29.8924	2719321	506.391	0
WellT	24	9256	242.244	684.94	135.472	5398194	583.21	0
WellT	25	8993	260.233	714.709	243.011	6653346	739.836	0
WellT	26	43825	244.877	840.304	1427.66	22755902	519.245	2
WellT	27	12336	273.282	835.904	1189.5	7298531	591.645	1
WellT	28	9811	251.977	844.266	1697.98	4389565	447.413	1
WellT	29	9760	192.019	922.088	62.8462	4294857	440.047	1
WellT	30	8057	278.084	939.265	1018.1	5977013	741.841	1
WellT	31	13016	268.86	978.192	1244.42	7207961	553.777	1
WellT	32	11088	260.348	995.247	1414.33	5964172	537.894	3
WellT	33	8170	280.408	1058.23	959.582	6036615	738.876	1
WellT	34	12118	276.636	1102.07	1116.33	7583244	625.783	2
WellT	35	10765	236.504	1123.32	1247.34	5850285	543.454	1
WellT	36	12793	279.895	1166.82	1503.1	8266304	646.158	0
WellT	37	8217	309.033	1170.4	762.754	7465533	908.547	0
WellT	38	14776	257.32	1194.96	1372.4	8010425	542.124	5
WellT	39	19655	250.69	1245.82	1148.46	12459618	633.916	3
WellT	40	10167	249.32	1228.27	993.97	6560307	645.255	3
WellT	41	8989	291.003	1286.45	805.056	6814857	758.133	2
WellT	42	8120	234.669	1321.13	1581.48	1630709	200.826	2
WellT	43	13342	322.892	1371.75	397.754	13699534	1026.8	1
WellT	44	13512	322.808	1386.19	965.583	11717293	867.177	3
WellT	45	6086	341.831	1428.46	1818.49	6720371	1104.23	0
WellT	46	5391	358.551	1447.68	1904.93	5703916	1058.04	0
WellT	47	12082	299.463	1476.53	1459.91	9224148	763.462	0
WellT	48	9328	273.863	1553.42	848.719	7819919	838.328	1
WellT	49	12182	319.792	1613.98	324.79	13087902	1074.36	0
WellT	50	12075	338.17	1810.27	821.943	12362072	1023.77	0
WellT	52	7438	269.877	2001.89	1014.36	6842091	919.883	0
WellT	1	7844	232.676	173.394	615.907	1161028	148.015	2
WellT	2	9102	203.898	193.726	358.109	1408217	154.715	3
WellT	3	6100	182.268	252.071	27.6805	908939	149.006	1
WellT	4	8567	224.367	256.018	552.567	1242622	145.048	3
WellT	5	8417	218.536	269.101	1961.76	3844698	456.778	1
WellT	6	9608	269.425	333.202	1651.77	5041813	524.752	2
WellT	7	11785	312.812	773.627	1070.56	9397053	797.374	0
WellT	8	10268	208.299	920.291	1962.68	6509905	633.999	0
WellT	9	18800	231.888	962.583	1473.37	3444775	183.233	10
WellT	10	11390	356.616	994.32	962.806	9266081	813.528	2
WellT	11	15235	261.873	1116.4	1481.73	9123986	598.883	3
WellT	12	17193	259.277	1165.3	1167.04	5893234	342.769	4
WellT	13	9643	224.179	1337.45	1617.12	6037425	626.094	0
WellT	14	13911	301.668	1368.57	1497.79	11685685	840.032	0
WellT	15	11061	294.419	1370.57	1367.49	7851157	709.805	1
WellT	16	8357	264.903	1508.21	1471.33	3451726	413.034	1
WellT	17	10748	218.094	1523.06	1145.26	5824987	541.96	6
WellT	18	10085	230.156	1583.5	1387.87	5859077	580.969	1
WellT	19	9573	232.421	1611	1517.99	4972073	519.385	0
WellT	20	10577	218.942	1761.12	1350.55	6258436	591.702	4
WellT	21	8990	260.737	1799.85	1568.73	7846935	872.852	2
WellT	22	10577	266.028	1816.33	337.614	6441173	608.979	0
WellT	23	9904	207.396	1871.85	191.501	5214120	526.466	2
WellT	24	15697	204.524	1970.95	72.8035	8927586	568.745	4
WellT	25	12398	215.543	1975.3	291.805	5597852	451.513	1
WellT	26	9413	243.535	1986.09	542.284	7430393	789.376	0
WellT	2	7550	265.084	38.1695	1660.09	3735365	494.75	0
WellT	3	15221	233.132	117.217	1885.26	6817457	447.898	3
WellT	4	10851	186.976	150.669	1016.73	1541534	142.064	1
WellT	5	11269	246.869	179.182	1639.96	5207730	462.129	2
WellT	6	10090	339.52	194.247	833.021	1520122	150.656	0
WellT	7	15759	234.883	251.022	1961.05	6748604	428.238	2
WellT	8	10875	302.767	271.888	1771.39	6072477	558.389	1
WellT	9	10623	194.552	365.684	1111.7	1645506	154.9	0
WellT	10	9607	309.765	414.999	2002.73	6503016	676.904	5
WellT	12	9857	278.346	1046.57	948.942	5532524	561.279	2
WellT	13	15422	306.917	1098.22	675.477	14222020	922.19	2
WellT	14	6291	307.817	1097.89	2014.78	4597246	730.766	0
WellT	15	6099	363.123	1190.47	380.636	5440335	892.004	0
WellT	16	5847	371.675	1270.49	361.484	5837146	998.315	0
WellT	17	11902	306.369	1333.29	854.569	7429711	624.241	4
WellT	18	15096	308.209	1465.61	781.413	10578673	700.76	0
WellT	19	10971	347.461	1576.24	507.093	9047019	824.63	1
WellT	20	11147	360.806	1565.02	1025.57	7507495	673.499	0
WellT	21	13473	318.422	1709.87	1031.3	9884378	733.643	0
WellT	22	14689	300.466	1751.75	875.045	14989138	1020.43	2
WellT	1	6531	221.353	29.6797	229.782	3897032	596.698	0
WellT	2	8771	243.988	35.0577	929.748	4554073	519.219	1
WellT	3	8350	261.033	36.1944	1228.93	4229051	506.473	0
WellT	4	8227	283.008	36.0083	1398.32	4137994	502.977	0
WellT	6	8364	188.014	66.7498	49.7652	3641031	435.322	1
WellT	7	10136	293.69	137.222	1970.12	7677101	757.409	0
WellT	8	8863	330.94	164.792	134.292	9046747	1020.73	0
WellT	9	15710	193.566	193.3	1083.96	6123293	389.77	5
WellT	10	15705	223.588	200.935	1282.32	6316306	402.184	3
WellT	11	11820	218.559	233.019	914.964	4668021	394.926	2
WellT	12	15037	228.385	290.859	1522.12	7033195	467.726	3
WellT	13	12605	189.179	344.115	1218.32	2217629	175.932	2
WellT	14	11024	188.171	375.099	1763.98	1731407	157.058	1
WellT	15	12338	259.931	393.683	204.315	6241465	505.873	0
WellT	17	13464	298.814	391.141	850.139	9158007	680.185	2
WellT	19	10707	238.057	413.545	446.669	4876398	455.44	2
WellT	21	13615	246.749	419.061	1620.66	6700676	492.154	0
WellT	22	5742	285.301	443.995	1279.39	3457048	602.063	0
WellT	23	5888	281.695	441.004	1181.31	3743068	635.711	0
WellT	24	14002	185.325	462.706	1027.56	2547937	181.97	4
WellT	25	12822	184.227	518.216	1359.28	2339263	182.441	1
WellT	26	13304	270.437	546.746	244.316	7191799	540.574	3
WellT	27	8923	211.026	544.339	1671.38	2141099	239.953	0
WellT	28	13844	211.441	552.8	528.798	5973351	431.476	2
WellT	29	12624	256.991	595.925	90.7474	7204023	570.661	0
WellT	30	12153	242.534	602.262	742.589	6388855	525.702	0
WellT	31	12413	197.359	612.987	1062.5	2271347	182.981	1
WellT	32	11166	225.436	683.38	220.622	5916013	529.824	0
WellT	33	13419	252.367	686.013	404.156	6945994	517.624	2
WellT	34	11699	263.348	817.446	50.6442	6300885	538.583	1
WellT	35	10186	245.931	817.475	1832.63	5868858	576.169	0
WellT	36	11670	234.426	851.528	1435.05	6014830	515.41	0
WellT	37	5870	296.439	1087.05	28.7722	4692471	799.399	0
WellT	38	11418	257.285	1270.72	702.633	7584444	664.253	4
WellT	39	9665	234.481	1299.55	1064.55	5749141	594.841	1
WellT	40	8692	239.159	1336.72	1293.48	4960905	570.744	1
WellT	41	10625	229.353	1349.35	1183.74	6877058	647.253	0
WellT	42	10180	216.227	1375.86	1394.83	6230067	611.991	0
WellT	43	10656	235.085	1390.83	254.391	6232360	584.869	0
WellT	44	10328	212.357	1442.47	1496.99	6394044	619.098	1
WellT	45	10015	243.087	1463.44	905.861	5837245	582.85	0
WellT	46	10145	232.404	1465.12	1244.63	6086516	599.952	0
WellT	47	9731	246.972	1499	1121.65	6413686	659.098	0
WellT	48	11321	234.569	1517.61	991.739	6463612	570.94	0
WellT	49	12120	219.823	1606.88	1202.66	6913668	570.435	1
WellT	50	11317	230.496	1639.02	1058.85	8240715	728.171	1
WellT	51	21603	226.058	1664.32	1334.88	7924591	366.828	1
WellT	52	9852	242.371	1706.2	820.114	6137296	622.949	2
WellT	53	13201	272.97	1731.06	1448.21	8279316	627.173	0
WellT	54	19736	285.688	1837.28	942.356	11496738	582.526	1
WellT	55	9781	237.88	1817.56	1298.43	6087989	622.43	0
WellT	56	14877	309.878	1832.75	1101.26	10835848	728.362	0
WellT	57	9136	241.127	1853.29	783.874	5486270	600.511	0
WellT	58	10491	300.938	1906.07	1817.07	6155435	586.735	0
WellT	59	12831	293.569	1918.95	1374.85	7598580	592.205	1
WellT	60	13166	298.728	1967.3	1139.68	8753042	664.822	1
WellT	61	7759	243.541	2004.82	914.694	4458240	574.59	0

## Sheet: 53BP1_MM_Rep2
ParentWell	CellIndx	NuclearArea	MeanNuclearIntensity	Centroid_1	Centroid_2	IntNuclearIntensity	pRBIntensity	NumPuncta
								0
E05	3	10536	7539.8	99.9494	738.953	12092095	1147.69	0
E05	4	16851	7876.86	109.691	86.8553	19863757	1178.79	0
E05	7	10567	4787.19	105.528	1873.89	8039787	760.839	0
E05	8	10314	3953.72	158.649	1254.46	6832333	662.433	1
E05	9	9835	7983.09	233.019	720.757	11778830	1197.64	0
E05	11	9543	8120.16	250.548	816.031	12279114	1286.71	0
E05	12	8468	3523.01	324.684	193.78	5766996	681.034	0
E05	13	10108	7156.7	357.406	1265.5	9526735	942.495	1
E05	14	8475	4178.46	425.009	630.064	6609434	779.874	0
E05	15	13282	6012.02	444.778	808.396	16005950	1205.09	1
E05	16	8658	7874.86	552.574	207.995	12324559	1423.49	0
E05	18	6229	3901.54	692.167	34.5025	5185722	832.513	2
E05	19	7536	5868.54	834.95	905.019	8255994	1095.54	0
E05	20	7224	4635.89	860.466	151.977	6337671	877.308	0
E05	21	8828	4796.64	899.038	574.318	8071587	914.317	1
E05	24	9543	9253.55	1124.17	1340.08	9690523	1015.46	0
E05	25	11357	6475.84	1288.56	1932.88	10750942	946.636	0
E05	27	7123	6510.34	1333.13	427.56	8775152	1231.95	0
E05	28	12379	8294.97	1349.62	605.887	18262648	1475.29	0
E05	30	8997	5555.56	1366.25	1047.58	9280487	1031.51	1
E05	31	9917	7489.14	1388.91	1655.83	12082136	1218.33	0
E05	32	6946	6116.92	1492.82	380.686	7759638	1117.14	0
E05	33	9261	5632.65	1508.82	601.268	9491456	1024.88	2
E05	34	12404	4327.29	1598.28	1867.44	8655131	697.769	0
E05	35	9898	6887.64	1602.48	1987.04	8118168	820.183	0
E05	36	7134	7611.3	1636.26	1057.72	1877036	263.111	0
E05	37	6873	5723.95	1695.94	249.724	6671863	970.735	0
E05	38	7781	7480.65	1704.67	931.522	2771109	356.138	0
E05	39	11854	8172.6	1760.96	748.161	14296159	1206.02	3
E05	40	7388	4597.22	1767.62	144.901	5857652	792.86	0
E05	41	7508	3543.69	1797.12	32.4963	5306955	706.84	0
E05	42	11936	3938.82	1804.89	282.212	2260415	189.378	1
E05	43	9608	4761.5	1845.84	498.253	8439784	878.412	1
E05	44	10512	3675.74	1948.3	230.561	1701577	161.87	0
E05	45	10033	7916.98	1984.99	1679.16	9455512	942.441	0
E05	46	10322	3904.05	1989.91	363.447	8119958	786.665	1
E05	4	10089	4280.33	119.053	65.1697	7734740	766.651	2
E05	6	8753	3521.23	156.778	304.346	6215147	710.059	0
E05	7	11476	5419.34	180.444	527.154	10665609	929.384	2
E05	8	8989	3755.55	258.334	1321.71	1317131	146.527	1
E05	9	10537	5257.03	291.35	1490.17	7419708	704.158	1
E05	10	10611	5598.25	305.009	1984.55	7696475	725.33	0
E05	11	8757	4273.06	359.263	604.735	1527584	174.441	3
E05	12	8974	4231.31	369.057	1166.37	6568888	731.991	2
E05	14	10882	3743.89	434.808	1678.71	6992504	642.575	0
E05	15	9716	3818.34	449.407	421.954	7911704	814.296	2
E05	16	6510	5588.62	453.096	1534.81	5644785	867.094	1
E05	17	8721	4243.79	476.394	1368.94	1877209	215.252	1
E05	18	11556	4114.33	485.902	1845.52	8149357	705.206	2
E05	20	10041	3970.48	577.854	63.8107	7150835	712.164	2
E05	21	7370	5204.66	599.844	1518.02	6464475	877.134	1
E05	22	9236	7709.9	625.471	968.374	10102239	1093.79	3
E05	24	13421	2844.55	658.027	1764.89	4996065	372.257	0
E05	25	8312	11758.5	657.697	572.767	18094086	2176.86	0
E05	26	10322	3783.23	691.311	419.831	8088029	783.572	0
E05	27	11553	4713.02	752.706	1571.6	9671033	837.101	1
E05	28	14079	4690.03	774.495	1844.21	8513194	604.673	1
E05	30	11207	3614.77	822.468	1671.33	5550726	495.291	0
E05	31	9926	4903.24	844.516	650.373	9619534	969.125	1
E05	32	8770	5026.29	874.968	506.742	7983666	910.338	2
E05	33	7129	4310.45	867.074	2001.24	5812685	815.358	0
E05	34	7419	5348.17	872.107	1339.59	6952234	937.085	0
E05	35	9016	4625.87	926.801	381.96	8373916	928.784	0
E05	36	11461	4927.33	967.826	1764.12	7086927	618.352	0
E05	37	9402	3619.15	984.175	93.8173	6391155	679.765	0
E05	38	10435	9573.49	993.679	1173.57	12766261	1223.41	0
E05	39	9778	5430.54	1012.38	603.526	11546360	1180.85	1
E05	40	10264	4926.87	1032.08	784.435	9039488	880.698	4
E05	41	8230	5438.36	1039.61	1312.07	7795437	947.198	0
E05	42	11261	4114.03	1162.72	1409.72	7399319	657.075	0
E05	43	11732	4314.13	1170.58	1231.54	9027751	769.498	0
E05	45	10080	7799.18	1209.45	1506.44	10894905	1080.84	0
E05	46	10792	4961.66	1193.8	309.445	11289099	1046.06	0
E05	47	11909	5558.29	1213.83	635.133	11220695	942.203	2
E05	49	13673	8263	1240.34	909.053	23428223	1713.47	0
E05	50	9234	5311.79	1297.38	1110.89	8081535	875.193	0
E05	51	10543	4069.32	1311.95	182.282	7809055	740.686	3
E05	52	9664	8096.26	1327.69	1283.61	10752281	1112.61	1
E05	53	8715	3667.06	1384.49	2010.89	6009523	689.561	1
E05	54	10668	7238.59	1416.16	1003.55	9808430	919.425	0
E05	55	10475	5090.97	1446.21	646.69	9352430	892.833	0
E05	56	8685	6025.07	1470.42	799.014	8134820	936.652	1
E05	57	10126	3904.82	1478.03	86.0413	6253146	617.534	0
E05	58	5183	7331.6	1475.06	1681.23	3822656	737.537	0
E05	59	5009	7810.96	1477.55	1801.16	4205189	839.527	0
E05	60	12059	6684.58	1501.89	1444.52	12284348	1018.69	0
E05	61	14902	4675.67	1546.84	1994.25	10272226	689.319	0
E05	62	9523	4206.8	1559.81	1871.08	5830591	612.264	0
E05	63	10815	6892.8	1558.47	482.208	11336292	1048.2	2
E05	65	11795	5292.3	1643.29	1089.51	9429483	799.447	0
E05	66	10082	3621.77	1634.9	171.43	6796900	674.162	1
E05	67	9872	5232.3	1650.35	869.216	7020037	711.106	0
E05	68	10247	5322.62	1759.43	1007.31	8363611	816.201	0
E05	69	11355	4998.5	1762.34	763.548	2135307	188.05	0
E05	70	9390	4672.19	1788.79	1771.28	6312450	672.252	1
E05	71	9148	4689.87	1795.08	1881.9	6450164	705.09	3
E05	72	11814	5298.31	1835.45	1571.69	9295356	786.809	0
E05	73	10479	7064.34	1839.49	1281.55	10317152	984.555	3
E05	74	10408	3901.72	1860.3	321.856	7874697	756.6	0
E05	75	9829	5246.4	1856.66	1101.89	8014828	815.427	0
E05	76	9972	3523.45	1884.65	113.411	7884731	790.687	0
E05	77	7418	6398.71	1914.26	817.801	5489815	740.067	0
E05	78	15502	5007.53	1934.08	650.356	11674244	753.08	0
E05	79	10912	4708.27	1938.44	1044.45	7777552	712.752	1
E05	80	7099	6607.16	1968.05	927.499	5548417	781.577	0
E05	81	10743	5569.92	1987.76	1524.07	8259115	768.79	1
E05	83	8560	4701.5	1999.91	1813.51	6522942	762.026	0
E05	84	8205	7712.32	2007.44	1294.06	8172643	996.056	0
E05	1	7752	3146.41	39.9138	321.342	1147074	147.971	1
E05	4	9192	6996	58.3235	1075.62	8411093	915.045	0
E05	5	10861	5062.36	102.719	1558.63	6758198	622.245	2
E05	6	10812	6030.97	99.2826	648.321	9249647	855.498	0
E05	7	8322	4689.74	115.85	43.0458	6273047	753.791	0
E05	8	12044	5828.42	151.395	744.924	9535747	791.743	0
E05	9	10953	5478.41	206.834	555.532	8714852	795.659	2
E05	10	10586	5830.93	213.007	866.167	8165978	771.394	2
E05	11	10072	4345.92	249.821	162.164	8104438	804.65	6
E05	12	11259	4978.69	261.447	1685.95	6220413	552.484	1
E05	13	10773	6066.73	299.21	720.396	9388018	871.44	0
E05	14	13795	5171.91	360.274	375.136	16121571	1168.65	0
E05	15	6001	5823.39	411.22	1411.69	6493357	1082.05	0
E05	16	14030	5332.17	433.45	1867.95	12521347	892.469	0
E05	17	5347	4494.26	442.253	939.033	755144	141.228	1
E05	19	13532	4818.7	466.36	1724.84	8699559	642.888	1
E05	20	6564	5678.75	457.502	1306.43	6689031	1019.05	0
E05	21	8328	5651.46	497.479	45.4888	6808190	817.506	3
E05	22	8999	4867.36	516.822	1939.92	5606696	623.035	1
E05	23	16638	5090.66	553.488	453.478	19556628	1175.42	0
E05	24	12795	5843.49	556.63	1467.67	11132491	870.066	2
E05	25	27953	5317.02	584.576	266.843	28904356	1034.03	2
E05	26	9600	4890.34	605.531	53.632	7486170	779.809	2
E05	27	12806	4928.94	615.524	1859.06	8608336	672.211	1
E05	28	11130	5957.14	612.512	1172.14	10185241	915.116	2
E05	29	5354	6360.32	615.962	1661.66	4483970	837.499	0
E05	30	5321	6745.83	632.609	1560.11	4967570	933.578	0
E05	31	12949	6204.33	672.06	755.21	11693234	903.022	0
E05	32	9643	6653.93	706.714	511.61	9881389	1024.72	1
E05	33	9169	4502.79	721.442	1431.94	6070795	662.1	1
E05	34	11346	6378	720.076	1974.73	9906197	873.1	0
E05	35	13866	6233.02	751.271	1674.4	15032924	1084.16	0
E05	36	10894	7733.38	803.013	1230.13	12042754	1105.45	1
E05	38	13741	4800.77	860.87	1857.57	8550749	622.28	0
E05	39	11496	7122.48	882.025	392.537	14119670	1228.22	1
E05	40	8316	4783.72	877.987	1667.92	6210227	746.781	0
E05	42	11822	7099.47	899.146	515.299	15041884	1272.36	0
E05	43	10254	3770.05	956.31	215.505	7781187	758.844	0
E05	44	9282	5039.31	969.959	1198.68	8193602	882.741	1
E05	45	9179	3671.18	989.092	60.5191	7117391	775.399	0
E05	46	9125	4211.57	989.652	1562.92	6204856	679.984	0
E05	47	11539	8409.08	996.468	916.633	15807883	1369.95	0
E05	48	10432	4798.11	1050.38	670.984	9267556	888.378	0
E05	49	11194	4724.85	1078.66	1236.59	9225571	824.153	2
E05	50	9761	4079.84	1102.21	270.32	7704630	789.328	0
E05	52	10800	6093.98	1103.83	433.751	14035700	1299.6	1
E05	53	9968	3198.97	1168.6	42.6943	6746532	676.819	0
E05	54	10043	4266.36	1147.14	1438.22	8603648	856.681	3
E05	55	10855	3496.76	1161.74	1840.52	1776483	163.656	1
E05	56	10575	4409.05	1260.46	1173.21	7766531	734.424	0
E05	57	10215	4571.41	1262.09	383.109	9700343	949.618	1
E05	58	10140	5078.33	1260.31	729.786	8368957	825.341	0
E05	59	10666	3617.97	1278.36	1945.78	7267894	681.408	0
E05	60	5278	3134.84	1368.54	22.4939	3703450	701.677	0
E05	61	10536	4132.04	1371.56	1359.08	8595512	815.823	0
E05	62	10307	4800.17	1370.21	1075.19	7962055	772.49	1
E05	63	13893	5873.61	1439.79	1647.26	11356662	817.438	0
E05	64	10031	4243.67	1436.64	93.9737	7191961	716.973	0
E05	65	12711	4758.33	1448.69	1880.45	8982572	706.677	0
E05	66	10633	7610.84	1481.59	233.537	13093228	1231.38	0
E05	67	6243	3792.12	1563.12	29.547	4490157	719.231	1
E05	68	10738	4552.79	1593.67	1189.79	8742508	814.165	0
E05	69	8491	6432.4	1595.11	561.663	12865018	1515.14	0
E05	70	12511	6537.07	1619.73	1496.91	11094443	886.775	0
E05	71	9911	5882.79	1637.31	1904.12	8430562	850.627	2
E05	72	7557	6564.25	1682.29	1003.37	7167929	948.515	2
E05	73	7797	4446.83	1749.19	132.161	6690126	858.038	0
E05	74	9546	5017.43	1785.14	832.221	7104741	744.264	0
E05	75	12296	6484.44	1799.13	1033.23	10818839	879.867	1
E05	76	11926	7542.27	1815.35	1334.67	11120090	932.424	0
E05	77	9483	4884.37	1813.09	538.086	8119637	856.231	0
E05	78	10129	8048.33	1821.27	1754.65	8758608	864.706	0
E05	79	11309	7960.85	1904.98	1575.46	13119050	1160.05	1
E05	80	7713	5554.9	1905.27	1999.45	6379726	827.139	3
E05	82	9793	5379.14	2001.15	1425.37	7273288	742.703	0
E05	83	8961	5094.85	2005.84	1683.63	7527114	839.986	1
E05	84	7969	5243.34	2004.54	1993.59	6518130	817.936	0
E05	85	8417	8034.65	2007.77	942.509	9199494	1092.97	2
E05	86	6937	8494.3	2017.88	1131.57	8227722	1186.06	1
E05	3	8872	3689.31	53.9771	1094.67	6363741	717.284	0
E05	5	7054	4859.94	42.6684	1453.89	4741247	672.136	1
E05	6	6466	5990.46	27.6596	1777.94	5604599	866.78	0
E05	7	10850	5244.42	78.9262	492.981	8557657	788.724	0
E05	8	10119	3778.29	93.9088	1547.92	7350299	726.386	0
E05	9	8650	8806.8	179.419	1913.08	9947449	1149.99	0
E05	10	11875	3475.67	194.505	395.707	6486861	546.262	1
E05	11	13717	4465.91	215.09	106.519	11773979	858.349	0
E05	12	13313	5049.43	250.644	1505.39	11029713	828.492	1
E05	13	12743	5292.02	287.288	1267.8	10026416	786.818	0
E05	14	11485	5242.46	305.312	1762.48	6955854	605.647	1
E05	15	10963	3280.13	317.504	926.867	5428267	495.144	2
E05	16	11055	3065.22	320.919	198.927	4861096	439.719	2
E05	17	12617	3740.47	336.279	607.329	9707744	769.418	4
E05	18	11744	4365.12	386.059	297.677	7772735	661.847	0
E05	19	13179	5759.88	410.018	1284.79	11642916	883.445	1
E05	20	11048	5832.99	422.856	836.625	9644369	872.952	2
E05	21	11298	3354.74	449.018	55.9555	9883391	874.791	1
E05	22	17118	5034.35	516.149	355.967	14926462	871.975	4
E05	23	14123	5653.61	485.905	463.891	12103245	856.988	1
E05	24	9804	4968.06	502.55	1650.57	5317153	542.345	1
E05	25	9304	8327.1	512.931	1823.64	10541489	1133.01	0
E05	26	11279	3936.79	511.429	700.003	7734577	685.75	0
E05	27	8376	4818.11	560.243	1393.2	7056376	842.452	2
E05	28	13914	5031.57	575.064	82.8869	12344314	887.187	0
E05	29	13395	6699.77	597.709	1003.35	15273098	1140.21	1
E05	30	9703	4983.22	628.767	694.357	9070461	934.81	1
E05	31	10102	4531.92	648.91	497.78	7535131	745.905	2
E05	32	10675	4984.25	683.739	1641.3	6174233	578.382	0
E05	34	10373	6666.64	726.356	818.003	8783040	846.721	0
E05	35	10410	4885.34	753.924	660.282	7833135	752.463	1
E05	36	13365	4958.89	763.997	66.1446	11046295	826.509	0
E05	37	8686	5617.39	752.484	515.397	8809885	1014.26	1
E05	38	15376	5016.95	774.185	255.991	11839171	769.977	1
E05	39	11153	6509.73	785.859	1696.8	10651414	955.027	1
E05	40	12388	6819.91	825.217	428.887	13247000	1069.34	0
E05	42	12267	8261.43	855.59	999.142	16890841	1376.93	2
E05	43	10082	4682.11	855.41	1469.82	1987606	197.144	1
E05	44	7972	4700.17	852.112	1876.02	6783476	850.913	0
E05	45	18195	5522.62	885.386	656.929	17928122	985.332	1
E05	46	8836	4028.17	878.928	94.3641	1879943	212.76	1
E05	47	7049	6050.04	881.565	1253.36	5764645	817.796	0
E05	48	9578	4281.54	936.53	218.555	2078910	217.051	3
E05	49	7418	6759.61	939.355	1106.33	8378046	1129.42	3
E05	50	7787	14317	974.279	456.059	15955091	2048.94	0
E05	51	6335	5509.67	951.824	1829.92	6551769	1034.22	0
E05	52	14628	6159.2	991.843	1201.16	12292549	840.344	1
E05	53	8413	5882.04	1045.02	536.141	9139690	1086.38	0
E05	54	13774	7207.66	1058.4	788.115	16417330	1191.91	0
E05	55	8704	3835.96	1066.29	47.7264	8520297	978.894	2
E05	56	9796	4319.56	1069.75	276.382	7799530	796.195	0
E05	57	12433	4482.36	1153.01	1635.61	7885043	634.203	3
E05	58	12029	3389.64	1150.81	1793.19	4177962	347.324	0
E05	59	11019	6863.81	1140.8	905.434	11388076	1033.49	2
E05	60	11326	5234.38	1168.83	1417	8644397	763.235	0
E05	61	11054	7659.98	1188.17	1925.21	10347252	936.064	0
E05	62	13402	4179.49	1185.92	293.472	10761932	803.009	4
E05	63	11121	5494.86	1207.5	1193.28	8575875	771.142	0
E05	64	10973	6570.87	1226.11	589.502	11159580	1017	4
E05	65	11415	5906.75	1311.85	943.539	10569950	925.97	0
E05	66	11521	5763.55	1337.49	1597	10416013	904.089	0
E05	67	12909	2872	1339.85	64.0239	2013090	155.945	2
E05	68	10007	5648.29	1380.15	1916.02	8067649	806.201	1
E05	69	11257	6942.05	1472.95	1850.41	10464161	929.569	0
E05	70	11679	9069.4	1469.76	796.221	17274302	1479.09	1
E05	71	10309	6611.08	1463.68	1001.13	9771596	947.87	2
E05	72	9310	7726.64	1585.54	1063.8	10235315	1099.39	2
E05	73	10203	8216.8	1650.07	1857.95	11198460	1097.57	0
E05	74	11312	7476.49	1661.84	1328.86	12394165	1095.67	3
E05	75	15010	6243.81	1754.94	1609.58	18987906	1265.02	2
E05	77	7535	6087.92	1853.16	495.475	8218393	1090.7	1
E05	78	10932	5542.82	1935.27	1515.7	8049331	736.309	2
E05	80	9531	3371.25	1992.63	156.839	3556683	373.17	0
E05	82	5783	4453.82	2024.43	601.317	5247163	907.343	0
E05	1	7752	3208.44	45.0464	71.8563	4463947	575.845	1
E05	3	9584	3369.08	112.906	297.739	5590943	583.362	1
E05	4	11556	3590.05	176.049	83.803	6951551	601.553	0
E05	6	7825	4148.91	163.914	708.044	4870384	622.413	0
E05	7	7151	4064.75	196.268	180.447	5013528	701.095	3
E05	8	9278	3517.09	270.706	400.065	5063799	545.786	0
E05	9	10350	4232.69	331.034	1678.13	5732110	553.827	0
E05	10	10693	5038.2	399.029	1345.24	8122354	759.595	0
E05	11	7459	12546.8	425.511	1098.27	15740915	2110.33	0
E05	12	11951	3998.56	437.319	1813.95	7364417	616.218	1
E05	13	12810	4034.22	455.261	100.628	9507470	742.191	2
E05	14	9831	4268.32	443.558	411.696	7628055	775.919	0
E05	17	9978	4691.4	474.518	270.876	8692029	871.119	1
E05	18	10763	5823.46	477.538	818.038	10850735	1008.15	1
E05	19	8538	4387.05	491.483	606.142	6323702	740.654	4
E05	20	10618	5257.88	608.598	1122.36	8230541	775.15	0
E05	21	8867	5247.56	614.15	1903.18	5558042	626.823	0
E05	22	8567	4325.82	668.434	1629.02	5545778	647.342	1
E05	23	9019	4342.03	677.27	1469.68	6232943	691.09	1
E05	24	10322	7072.23	756.494	262.501	11945856	1157.32	2
E05	25	9378	4854.25	740.537	815.925	7627866	813.379	0
E05	26	10345	4559.32	774.024	1066.83	8003684	773.677	2
E05	27	10274	7879.57	775.642	1294.75	9276285	902.889	0
E05	28	9236	5156.67	937.516	750.017	6159923	666.947	0
E05	29	10623	6740.29	1020.48	1761.27	10485534	987.06	1
E05	31	10076	7265.34	1055.13	1156.67	9773309	969.959	0
E05	32	7877	6134.34	1058.8	678.552	6532882	829.362	0
E05	33	10736	8521.75	1210.67	1337.22	12533736	1167.45	1
E05	34	6630	5682.05	1208.56	2004.95	5095123	768.495	0
E05	35	8446	12821.3	1230.63	289.596	18434152	2182.59	0
E05	36	10555	3815.73	1294.95	1768.67	7316130	693.144	0
E05	37	10289	5250.84	1308.4	853.188	8760289	851.423	0
E05	38	7848	3782.62	1310.87	44.0191	6045537	770.328	0
E05	39	9106	4671.16	1340.04	236.013	7787100	855.161	0
E05	40	11828	8489.6	1348.83	1080.41	11406735	964.384	1
E05	41	9839	8874.91	1359.22	1414.99	11539026	1172.78	0
E05	42	10368	9699.19	1364.72	1259.88	14313527	1380.55	1
E05	43	12052	6853.13	1395.74	1623.21	11095777	920.659	0
E05	44	8701	4423.68	1407.99	1881.58	6690784	768.967	0
E05	45	11261	4579.74	1409.28	453.943	9775869	868.117	2
E05	46	9772	4112.63	1407.54	115.251	8854072	906.065	0
E05	47	9933	5873.16	1473.05	816.202	10376606	1044.66	0
E05	49	10121	7170.68	1469.06	1176.89	9994058	987.458	0
E05	50	21634	7540.66	1544.55	1700.87	18856647	871.621	1
E05	51	11226	4088.89	1532.39	373.086	9660653	860.561	0
E05	52	11308	3220.39	1550.23	52.1148	7065494	624.823	0
E05	53	25466	9764.43	1597.03	726.356	20851106	818.782	0
E05	54	13581	7008.98	1590.97	1505.79	12708162	935.731	1
E05	55	10381	6993.57	1600.98	1185.43	10098901	972.825	2
E05	56	9364	6526.27	1612.32	1070.57	10078147	1076.27	3
E05	57	11321	8745.59	1618.11	1303.54	12655591	1117.89	1
E05	58	9579	4765.26	1652.64	1790.16	7185147	750.094	1
E05	59	12833	6977.83	1686.99	1601.32	11130621	867.344	0
E05	60	8916	4763.79	1677.17	364.444	7950664	891.73	0
E05	61	10558	8242.4	1703.32	672.642	15664284	1483.64	1
E05	62	11861	5593.84	1727.11	958.939	11031550	930.069	0
E05	63	10212	6127.56	1708.34	1891.27	8607541	842.885	0
E05	64	8581	3684.57	1713.67	49.7538	3887564	453.043	1
E05	65	12129	7927.09	1725.49	1412.9	12516033	1031.91	2
E05	66	7485	6102.81	1727.62	493.474	7353471	982.428	0
E05	67	10221	6115.81	1746.63	1183.11	9091958	889.537	1
E05	68	10452	4226.23	1766.99	1973.58	6897255	659.898	0
E05	69	9791	6626.62	1780.96	1077.89	10551283	1077.65	3
E05	70	9813	8704.41	1786.65	791.277	14219628	1449.06	1
E05	71	6707	7655	1780.88	617.184	7836739	1168.44	0
E05	72	9288	13012.5	1831.29	1647.34	18147163	1953.83	0
E05	73	8811	3820.63	1847.91	138.007	6649372	754.667	0
E05	74	9621	6630.1	1864.11	1278.39	8583707	892.184	1
E05	75	5883	9069.91	1852.53	692.355	7573947	1287.43	0
E05	76	8415	5534.92	1884.7	1494.05	9663163	1148.33	0
E05	77	10547	5519.48	1915.98	1038.55	9653803	915.313	1
E05	78	12465	6002.07	1922.34	835.661	12013808	963.803	2
E05	80	7842	13763.8	1963.32	1944.12	9966422	1270.9	0
E05	81	5570	7969.73	1956.36	667.363	6297259	1130.57	0
E05	82	10081	4917.73	1993.38	1503.62	10780903	1069.43	0
E05	83	8788	4859.67	1999.44	1206.46	7169603	815.84	1
E05	84	7799	6231.11	2008.24	886.676	8097365	1038.26	2
E05	1	7183	3070.12	35.9244	181.72	3943025	548.938	0
E05	2	5636	3219.62	23.8125	359.363	901698	159.989	0
E05	3	5640	4875.37	27.5406	1299.7	3784089	670.938	0
E05	6	8488	4055.35	50.0518	1692.12	6067706	714.857	1
E05	7	11324	4213.07	84.1551	1172.74	6165676	544.479	1
E05	8	12186	5142.77	98.0374	1500.45	7702214	632.054	0
E05	10	8108	4756.06	222.693	869.885	1439737	177.57	1
E05	11	10178	5306.84	253.33	1442.99	7181413	705.582	0
E05	12	8766	4706.26	259.529	1098.82	1723599	196.623	1
E05	13	10444	6085.91	302.721	417.201	8686505	831.722	2
E05	15	11098	5233.99	418.38	1341.68	7361995	663.362	0
E05	16	10377	8555.15	428.658	1032.22	11591728	1117.06	0
E05	17	12884	3997.15	445.598	64.8767	8380650	650.47	0
E05	18	9851	3571.62	498.13	1706.63	6501993	660.034	0
E05	20	12475	5590.88	559.961	428.395	12605885	1010.49	0
E05	21	11501	5663.93	587.374	951.152	10324787	897.73	3
E05	23	8803	3526.94	687.889	70.1858	3580920	406.784	1
E05	24	12678	5764.94	741.054	1333.77	8538601	673.497	1
E05	26	11610	5924.68	762.822	350.408	10626941	915.327	0
E05	27	6353	6858.84	741.154	662.258	8654181	1362.22	0
E05	28	11649	7617.82	773.906	1177.29	11835297	1015.99	1
E05	29	7123	6082.47	767.112	527.139	8988921	1261.96	0
E05	30	7249	4961.1	777.593	1495.41	5208591	718.525	2
E05	33	10634	5611.29	820.147	135.059	8071244	759.004	0
E05	34	8552	5437.46	869.099	760.34	7308731	854.622	1
E05	35	9763	5327.11	924.33	924.512	11350094	1162.56	1
E05	36	9963	4962.21	937.869	1171.75	7648718	767.712	1
E05	37	12531	7176.11	980.425	344.593	13188127	1052.44	1
E05	38	11847	8060.3	999.647	691.261	14116349	1191.55	0
E05	39	7037	5396.67	982.429	1737.43	4501136	639.638	1
E05	40	8944	6298.47	1004.77	987.27	9052546	1012.14	0
E05	41	7944	4869.62	1025.2	1462.42	6050315	761.621	0
E05	42	9817	6334.2	1023.47	75.2251	8806229	897.039	1
E05	43	9789	6292.86	1072.3	471.677	2653003	271.019	1
E05	44	12300	6400.64	1084.35	613.317	13885589	1128.91	1
E05	45	9666	5213.98	1086.06	1251.84	8691914	899.226	0
E05	46	8389	5896	1094.07	1033.92	8149618	971.465	3
E05	47	11534	6840.61	1109.1	304.006	10094333	875.181	1
E05	48	12048	6867.46	1184.7	1453.05	11330271	940.428	1
E05	49	7570	8129.98	1187.99	588.031	10758545	1421.21	0
E05	51	5446	5067.35	1204.7	32.6853	4438865	815.069	0
E05	52	10636	8516.53	1234.38	1207.9	11999480	1128.19	0
E05	53	9132	5121.39	1234.79	979.395	7371510	807.217	2
E05	54	10505	4491.9	1255.04	1598.93	7993092	760.885	7
E05	55	12520	9119.86	1288.36	666.472	11526359	920.636	0
E05	56	10834	6543.2	1281.87	1840.03	9020055	832.569	0
E05	57	22484	6701.33	1360.7	518.426	5456291	242.674	0
E05	58	11219	7288.01	1352.67	198.556	13499080	1203.23	1
E05	59	13038	6164.52	1372.46	1658.75	11618715	891.142	1
E05	60	11080	5510.41	1372.72	1213.16	10466382	944.619	1
E05	61	9353	4568.65	1414.14	1562.39	7226970	772.69	1
E05	62	11700	6219.52	1415.49	1835.74	8729310	746.095	1
E05	63	8917	3762.78	1439.49	53.5939	9143067	1025.35	1
E05	64	11228	7070.85	1472.9	1125.75	10321177	919.236	1
E05	65	10689	4374.05	1548.77	1392.58	9238841	864.332	1
E05	66	9467	5287.01	1550.8	801.558	2001647	211.434	1
E05	67	9515	6279.86	1547.57	303.439	9129505	959.486	0
E05	68	11805	3161.92	1598.06	102.579	9334306	790.708	0
E05	69	9140	4723.04	1617.14	1610.95	5342065	584.471	1
E05	70	10113	7845.16	1651.49	1194.81	10425976	1030.95	3
E05	71	8792	4875.52	1663.8	1777.75	7224917	821.76	1
E05	72	10746	5586.82	1708.92	402.175	8729186	812.32	1
E05	73	10172	6991.84	1709.67	1990.83	8948572	879.726	0
E05	74	13044	6254.2	1716	264.826	9486725	727.286	0
E05	75	9401	8239.77	1713.47	594.195	10681593	1136.22	0
E05	76	10453	4638.85	1725.76	1473.73	8546665	817.628	0
E05	77	11058	8302.27	1737.57	1271.83	12987396	1174.48	0
E05	78	9816	5494.21	1752.36	978.789	10469272	1066.55	3
E05	79	12121	4813.47	1823.3	127.462	7778316	641.722	0
E05	80	11221	6686.22	1841.49	1230.53	11429108	1018.55	1
E05	81	11249	7713.57	1908.27	460.268	13442160	1194.96	0
E05	82	10712	8828.55	1906.52	1466.04	12952224	1209.13	0
E05	83	12988	7621.33	1925.24	712.302	14314964	1102.17	0
E05	84	10863	4911.34	1926.21	1086.91	9385878	864.023	1
E05	85	9468	5730.27	1939.7	889.146	11105008	1172.9	0
E05	86	12351	3645.88	1953.76	197.168	4773054	386.451	0
E05	87	8799	5304.41	1959.67	1655.33	9281930	1054.88	0
E05	88	9855	6146.22	2013.5	1183.98	8646944	877.417	0
E05	89	6110	7495.78	2020.94	883.99	6783600	1110.25	0
E05	90	5349	6477.86	2022.77	1980.99	4654420	870.148	0
E05	3	7119	3857	34.0893	1413.64	3822342	536.921	0
E05	5	10777	5421.14	56.6657	1804.63	6858424	636.395	0
E05	7	13218	5212.04	106.932	1944.31	9114419	689.546	0
E05	9	8340	4157.35	141.117	859.537	5250797	629.592	0
E05	10	9685	3385.54	176.265	379.797	6667305	688.416	0
E05	11	7327	11174	142.55	1511.01	10353086	1413	0
E05	12	11443	6160.91	161.778	1032.11	10271186	897.596	2
E05	14	13369	5281.11	221.022	1690.26	9997102	747.782	0
E05	15	11973	5810.94	232.493	1825.62	9418725	786.664	1
E05	16	6839	6244.66	251.03	2015.35	6101646	892.184	0
E05	17	10584	5480.79	260.388	1073.14	10138229	957.883	2
E05	18	8950	4304.37	307.646	38.4194	7328605	818.839	0
E05	19	7084	12588.1	401.537	565.619	14882014	2100.79	0
E05	20	9444	3725.24	414.101	1802.59	1671157	176.954	2
E05	21	8379	6356.66	425.122	1137.08	8531436	1018.19	2
E05	22	10022	6048.61	522.664	265.301	7908768	789.141	1
E05	23	6722	5560.49	578.904	1411.56	5238094	779.246	1
E05	24	10827	6900.69	615.528	978.355	9766786	902.077	1
E05	25	11111	6925.11	619.642	683.682	10291878	926.278	0
E05	26	9521	4857.75	732.449	2010.36	7500893	787.826	0
E05	28	14665	4373	852.463	1763.37	8577850	584.92	0
E05	29	8338	5663.23	867.637	849.156	6658977	798.63	0
E05	30	12276	7845.53	899.279	1054.7	14005783	1140.91	0
E05	31	5276	8787.75	895.744	747.353	5361290	1016.17	0
E05	32	5222	9199.23	962.032	724.542	5985112	1146.13	0
E05	33	10944	6450.35	990.262	188.224	11481645	1049.13	1
E05	34	10820	8909.66	1029.09	1237.4	14776400	1365.66	0
E05	35	11306	5810.42	1086.13	301.243	11528192	1019.65	7
E05	36	11413	8878.98	1081.52	731.471	14745630	1292	0
E05	37	10582	8770.63	1116.47	867.148	13045592	1232.81	1
E05	38	11566	8906.41	1163.74	1051.11	14332438	1239.19	0
E05	39	12642	7544.87	1175.67	427.632	13670345	1081.34	0
E05	40	10970	6130.53	1189.09	68.501	9305260	848.246	1
E05	41	13833	6166.56	1217.85	285.43	11809051	853.687	0
E05	42	11093	9869.4	1219.68	951.155	18503315	1668.02	0
E05	43	11540	7849.49	1218.5	1207.56	12716525	1101.95	0
E05	44	9762	5356.07	1267.19	487.899	11863309	1215.25	0
E05	45	11387	9262.97	1272.2	723.863	16079138	1412.06	0
E05	46	10880	7201.58	1275.08	118.744	11553967	1061.95	0
E05	47	10127	5737.98	1277.97	1895.42	8029191	792.85	1
E05	48	8687	6642.84	1313.18	1041.03	9802255	1128.38	1
E05	49	10262	7144.35	1313.19	1713.31	10834781	1055.82	0
E05	50	7946	7549.57	1386.63	944.754	10518032	1323.69	1
E05	51	7780	5519	1387.54	307.782	7279053	935.611	1
E05	52	10895	11633.2	1495.57	975.173	17180444	1576.91	1
E05	53	8539	13942.3	1547.93	527.659	22584664	2644.88	0
E05	54	5086	12398.5	1562.42	845.09	9083770	1786.03	0
E05	55	12849	6086.14	1621.25	235.165	13387981	1041.95	1
E05	56	8702	5404.7	1649.73	358.708	7992053	918.416	0
E05	57	5368	12672.9	1632.06	820.496	10574547	1969.92	0
E05	59	10154	10755.4	1725.89	860.377	16265050	1601.84	0
E05	60	9451	4494.3	1733.3	1929.04	6629306	701.44	1
E05	61	12198	7591.15	1783.62	457.607	18077395	1482	0
E05	62	7526	6039.16	1771.99	656.94	7160033	951.373	0
E05	63	7363	5133.57	1806.68	287.855	5605652	761.327	0
E05	64	12495	4599.32	1860.83	97.794	8653926	692.591	1
E05	65	9963	4657.84	1915.01	464.849	6957373	698.321	0
E05	66	8908	8343.81	2000.28	540.018	13104183	1471.06	1
E05	67	8073	8456.88	1999.65	751.935	8699983	1077.66	0
E05	68	9021	8038.69	2007.52	1859.12	8831627	979.008	0
E05	2	8260	5680.85	38.5961	353.361	6908273	836.353	0
E05	3	5500	3323.92	24.1567	594.975	3875123	704.568	0
E05	4	8569	3244.41	62.0042	52.7596	1693497	197.631	0
E05	6	7796	4390.55	144.104	701.042	5807699	744.959	0
E05	7	7142	4666.37	155.781	957.104	5630198	788.322	0
E05	8	5012	4766.27	239.539	22.5052	3998992	797.883	0
E05	9	10758	5781.27	314.081	772.284	9221686	857.193	1
E05	10	16581	3628.8	342.068	258.533	10928063	659.071	1
E05	11	9990	7416.12	412.422	1323.23	9925976	993.591	0
E05	12	6527	5458.35	508.157	1101.22	4888701	748.997	1
E05	13	13675	5052.52	541.899	1578.9	9143681	668.642	0
E05	14	8765	3850.16	662.766	182.16	5597757	638.649	0
E05	15	5922	3916.41	737.366	22.0746	4888326	825.452	0
E05	16	7759	5045.04	736.884	1206.64	5175372	667.015	0
E05	17	10344	5945.83	758.731	886.434	9204488	889.838	0
E05	18	8410	4158.37	827.867	1996.71	7023984	835.194	1
E05	19	8583	4588.37	877.325	354.558	6738239	785.068	0
E05	20	5213	11170.4	909.655	995.794	10715747	2055.58	0
E05	21	9713	7402.87	939.162	1525.46	9858068	1014.94	1
E05	22	10006	6322.33	939.433	1150.19	9133028	912.755	1
E05	24	10869	11698.8	1057.86	445.733	25422734	2339.01	0
E05	25	8639	6062.71	1066.28	896.666	8819772	1020.93	2
E05	26	11556	5590.56	1129.89	1469.89	9540057	825.55	2
E05	27	8105	6386.27	1240.89	766.714	8057525	994.143	0
E05	28	11484	10621.4	1272.48	933.236	23400595	2037.67	0
E05	29	10517	5193.83	1286.18	254.762	11588432	1101.88	0
E05	30	10208	6023.3	1311.29	1325.71	9770039	957.096	0
E05	31	10500	6735.25	1349.1	596.648	12508760	1191.31	2
E05	32	9254	3702.57	1367.14	1999.68	1669251	180.382	2
E05	33	8310	8503.99	1396.54	106.451	10218108	1229.62	0
E05	34	9704	4006.15	1465.38	1623.54	6755158	696.121	0
E05	35	8076	6750.45	1479.5	614.279	7873482	974.923	1
E05	36	9395	4077.08	1510.71	1825.53	6396917	680.885	1
E05	37	7156	8426.99	1527.43	792.763	9630961	1345.86	1
E05	38	14882	7360.82	1582.79	670.259	16852351	1132.4	0
E05	39	12982	6534.07	1616.09	1327.51	14659968	1129.25	0
E05	40	7878	7823.78	1608.35	921.892	9359185	1188.02	2
E05	41	7512	8506.21	1605.11	834.232	9881368	1315.41	0
E05	42	10670	4031.17	1632.93	1939.23	6324732	592.758	0
E05	44	12386	7970.46	1646.01	487.762	19120210	1543.7	1
E05	45	11920	9002.51	1671.68	1045.3	14840935	1245.04	1
E05	46	8264	4850.31	1717.59	1773.85	5459297	660.612	1
E05	47	15663	7213.65	1764.79	853.612	16588109	1059.06	2
E05	48	8878	9049.41	1751.55	296.417	10534198	1186.55	0
E05	49	10855	3849.27	1793.77	1960.3	1823182	167.958	0
E05	50	11055	8962.21	1812.76	656.346	11761108	1063.87	0
E05	51	11577	9297.5	1899.09	894.441	14015407	1210.63	0
E05	52	12125	6415.43	1914.57	372.78	11707516	965.568	1
E05	53	16636	5987.44	1946.77	712.964	15210746	914.327	1
E05	54	8530	6531.92	1992.98	1223.99	8892547	1042.5	0
E05	55	11542	7984.75	1993.4	1523.36	14488881	1255.32	0
E05	56	5526	6316.24	2021.08	1320.1	3011840	545.031	0
E05	57	5121	5348.75	2027.05	159.521	4041426	789.187	0
E05	4	8726	8035.71	118.167	557.405	11862273	1359.42	0
E05	5	8508	3513.42	143.609	135.105	6085237	715.237	1
E05	6	8795	6595.57	221.674	313.051	9375267	1065.98	0
E05	7	9396	3804.81	321.314	1487.87	6737791	717.091	0
E05	8	9687	3342.13	394.968	1809.2	1505738	155.439	3
E05	9	9853	7010.09	485.628	567.832	9036653	917.147	0
E05	10	6908	6049.95	597.153	1326.04	6340797	917.892	0
E05	11	9269	8627.74	628.093	1523.41	6409706	691.521	0
E05	12	10939	9360.65	684.781	925.327	24519341	2241.46	0
E05	13	8184	4077.26	704.299	210.449	5182459	633.243	0
E05	14	10168	8244.84	853.942	1035.79	10453288	1028.06	0
E05	15	9887	4788.62	886.248	198.008	8027597	811.935	0
E05	16	6780	5685.47	869.471	450.099	5350601	789.174	2
E05	17	10095	3659.98	935.416	1970.74	6613497	655.126	0
E05	18	5693	6961.92	1040	29.0492	6333984	1112.59	0
E05	19	11171	6847.92	1046.79	1595.46	12303785	1101.4	0
E05	20	11948	4558.02	1055.32	354.204	10533698	881.629	2
E05	21	10690	3644.44	1096.69	1934	7819551	731.483	2
E05	22	7303	5326.22	1245.9	275.916	7854688	1075.54	0
E05	23	8452	5162.26	1269.28	1015.22	7034261	832.26	1
E05	24	7493	4972.18	1291.98	1572.65	4949393	660.536	0
E05	25	7964	3354.63	1336.66	27.3866	4488748	563.63	2
E05	26	8276	5564.83	1402.9	707.242	7066845	853.896	0
E05	27	8584	4121.95	1441.01	1719.84	5941825	692.198	3
E05	28	9518	13012.9	1460.33	1179.8	21788645	2289.2	0
E05	29	9740	7302.65	1485.89	1948.71	10236917	1051.02	0
E05	30	10329	4326.41	1589.98	1846.2	7775626	752.796	2
E05	33	9513	8616.41	1639.32	1222.73	8613722	905.469	2
E05	34	7788	5111.78	1674.27	1702.25	6554916	841.669	0
E05	35	9147	4670.84	1703.17	1932.39	6484799	708.954	1
E05	36	8336	7083.21	1770.06	2006.42	8317195	997.744	2
E05	37	9215	5010.99	1786.84	1663.07	7303688	792.587	0
E05	38	10811	4226.45	1795.68	1818.55	6916050	639.723	1
E05	39	6051	6998.48	1781.34	324.171	7284243	1203.81	0
E05	40	9838	8896.61	1800.78	1051.83	9553028	971.034	1
E05	41	7065	6443.43	1893.54	1235.92	6998231	990.549	0
E05	42	9306	4444.9	1918.46	1942.16	6879841	739.291	0
E05	43	11299	7581.65	1930.47	1645.23	12111560	1071.91	0
E05	44	6689	5153.83	1917.72	250.922	5956920	890.555	0
E05	45	9784	5327.52	2002.55	1820.46	7545410	771.199	1
E05	47	5443	5258.37	2020.07	95.2201	4589416	843.178	0
E05	48	5080	5653.78	2020.44	316.856	4982650	980.837	0
E05	2	8294	6157.07	45.7196	928.903	9929208	1197.16	0
E05	3	8468	4794.32	50.744	1835.27	6839713	807.713	1
E05	4	7839	4011.74	69.1958	1560.55	4735594	604.107	1
E05	5	8774	4766.69	121.547	996.546	9009425	1026.83	0
E05	6	9585	5785.27	141.222	761.82	9446661	985.567	0
E05	7	8827	3294.14	176.032	192.937	6363858	720.954	0
E05	8	8539	5134.89	238.237	880.873	9945231	1164.68	0
E05	9	10558	4548.9	399.635	81.8298	7672708	726.72	0
E05	10	8966	8041.76	435.687	447.996	12732960	1420.14	0
E05	11	5950	5611.81	478.712	1744.89	4384369	736.869	0
E05	12	8171	9380.25	542.295	405.688	12589635	1540.77	0
E05	13	7775	4314.26	600.112	1881.52	5392554	693.576	0
E05	14	12091	6896.21	661.142	955.575	15004586	1240.97	1
E05	15	8172	4687.15	724.239	389.195	7140237	873.744	1
E05	16	8696	4088.24	719.238	1873.81	5308245	610.424	0
E05	17	10288	4605.49	746.95	1085.03	10597303	1030.06	2
E05	18	10270	3900.45	754.791	1523.55	6923105	674.11	2
E05	19	8058	4146.24	844.83	96.9481	5785029	717.924	0
E05	20	6486	6291.69	872.939	473.856	7936363	1223.61	1
E05	21	8894	4073.11	890.538	1801.86	5483599	616.55	1
E05	22	6786	4899.87	949.733	2005.7	4973108	732.848	0
E05	23	11083	4565.98	974.487	94.2911	8468115	764.063	0
E05	25	8762	4364.18	976.881	1584.54	6911537	788.808	1
E05	26	14370	8255.04	1046.26	907.017	31824839	2214.67	0
E05	27	11017	4668.9	1072.68	131.526	7332434	665.556	2
E05	28	7212	4928.6	1086.45	1743.3	5651808	783.667	0
E05	29	9744	4487.31	1106.85	605.403	7541798	773.994	0
E05	30	5927	6479.01	1175.22	238.221	8934709	1507.46	0
E05	31	9572	10513.5	1214.7	1299.08	15738318	1644.2	0
E05	32	6112	6345.14	1321.01	237.972	8965455	1466.86	1
E05	33	6662	6966.18	1337.15	1206.57	7326723	1099.78	1
E05	34	10182	5598.04	1380.08	774.458	10337078	1015.23	1
E05	35	9641	8193.56	1404.87	1472.4	11944810	1238.96	0
E05	36	11654	4194	1520.58	982.937	8215163	704.922	0
E05	37	7285	6330.52	1528.35	1238.09	7806765	1071.62	0
E05	38	12849	5490.32	1589.43	72.4017	14160332	1102.06	1
E05	39	10221	4980.8	1591.31	605.5	9561390	935.465	1
E05	40	8174	12122.9	1619.66	264.269	18509943	2264.49	0
E05	41	9630	4537.34	1667.52	1603.07	6651527	690.709	2
E05	42	12132	8252	1701.42	1115.41	15425112	1271.44	0
E05	43	11468	9853.5	1711	877.599	14675568	1279.7	0
E05	44	11913	7886.16	1726.4	1254.67	13719157	1151.61	1
E05	45	10122	6475.13	1737.95	1423.19	8367031	826.618	2
E05	47	9753	8810.79	1810.37	391.431	11652924	1194.8	0
E05	48	10357	8381.94	1840.28	1074.15	10784851	1041.31	0
E05	49	9586	9173.87	1846.37	175.775	17985582	1876.23	0
E05	50	7997	6409.7	1875.24	975.105	7470114	934.115	0
E05	51	9696	5034.3	1913.06	830.304	8354719	861.667	1
E05	52	11105	8195.79	1974.88	1373.36	12965403	1167.53	1
E05	53	8421	5564.35	1988.74	228.135	7236251	859.31	2
E05	55	7314	9021.03	2012.62	352.716	8233663	1125.74	0
E05	56	5754	5850.22	2010.22	1070.13	4586772	797.145	0
E05	1	5360	9448.44	36.056	915.832	5908002	1102.24	0
E05	3	8377	7178.19	45.9415	1210.1	10244970	1222.99	0
E05	4	5610	4060.98	31.8988	1709.99	3469191	618.394	0
E05	5	9279	9072.94	77.2364	1937.47	11296187	1217.39	0
E05	6	13666	5675.43	93.1877	1472.86	15775439	1154.36	0
E05	7	11418	5659.01	106.503	1058.94	8752541	766.556	0
E05	8	9735	3128.14	149.806	385.582	5454097	560.256	1
E05	9	11197	3449.93	147.069	650.449	2201256	196.593	0
E05	10	11780	5188.04	215.015	118.824	10373280	880.584	0
E05	11	12451	5387.28	237.372	911.26	9685256	777.87	0
E05	12	10258	4049.23	265.179	1120.06	7570852	738.044	1
E05	13	7205	4888.08	268.033	768.785	4889827	678.671	1
E05	14	9969	3794.6	280.975	521.248	1801273	180.687	0
E05	15	11383	5881.76	316.563	1958.4	9667560	849.298	0
E05	16	10044	3297.54	335.928	273.204	6226079	619.88	4
E05	17	8056	5001.85	343.676	669.44	7252649	900.279	0
E05	18	11095	4923.37	368.963	1007.86	8543560	770.037	0
E05	19	9398	4205.83	379.877	1186.49	6846690	728.526	1
E05	20	11609	7286.59	441.721	865.903	11864436	1022	0
E05	21	7762	5241.05	438.589	749.219	6715051	865.119	1
E05	22	12847	6292.63	452.247	1423.39	10373088	807.433	0
E05	23	12743	4845.95	504.486	1095.95	9546179	749.131	2
E05	24	10801	4647.41	569.923	1306.56	9494335	879.024	1
E05	25	10022	3753.68	572.451	1721.78	7452475	743.612	0
E05	26	13931	6188.02	601.072	927.726	12278698	881.394	0
E05	27	7591	7644.74	598.819	2009.38	7427065	978.404	0
E05	28	7928	4532.36	630.796	273.417	7281752	918.485	0
E05	29	12260	4179.26	678.32	1819.47	6686777	545.414	0
E05	30	12412	6715.02	684.447	1240.17	13514857	1088.85	0
E05	31	8092	5048.37	684.904	652.984	6768522	836.446	0
E05	32	9635	5644.11	708.322	822.818	11698405	1214.16	3
E05	33	12383	4442.33	737.846	1630.02	7489153	604.793	1
E05	34	9065	3830.3	788.292	171.952	7175172	791.525	0
E05	35	9099	5042.13	808.621	1099.83	9060438	995.762	0
E05	36	9749	6256.78	844.892	1986.97	7868300	807.088	0
E05	37	8533	5412.69	881.507	948.817	8143059	954.302	0
E05	38	11974	5810.25	880.263	1854.58	8863277	740.21	0
E05	39	9987	7523.63	959.457	238.006	12600491	1261.69	0
E05	40	11316	8140.43	986.889	779.702	15120569	1336.21	1
E05	42	9265	3937.8	1015.08	1904.78	5782489	624.122	0
E05	43	7722	5635.55	1044.1	437.715	8185049	1059.96	0
E05	44	6653	5686.46	1095.01	207.207	6598035	991.738	2
E05	45	5406	4224.29	1118.5	2018.87	4254065	786.915	0
E05	46	13122	7527.55	1181.72	1048.46	15855919	1208.35	0
E05	47	12838	3455.07	1206.61	1446.27	1909296	148.722	1
E05	48	9758	5402.47	1236.5	725.806	9723987	996.514	0
E05	49	9228	4799.15	1258.32	298.081	8749051	948.098	2
E05	50	11444	6830.04	1278.21	920.659	10929799	955.068	0
E05	51	10171	4524.75	1283.67	1328.86	1752659	172.319	0
E05	52	8369	4219.57	1281.01	1836.98	6242477	745.905	1
E05	53	5643	7268.41	1312.2	1258.56	916246	162.369	0
E05	54	10852	7260.78	1327.04	1058.62	11645530	1073.12	1
E05	56	8597	6219.74	1393.5	816.097	9276881	1079.08	0
E05	57	7697	4772.8	1428.68	1732.98	6026519	782.97	1
E05	58	8087	5890.27	1458.43	565.351	8392106	1037.73	0
E05	59	11430	6720.5	1513.39	1985.59	11150653	975.56	0
E05	60	8117	6361.54	1589.28	963.912	10472042	1290.14	0
E05	61	5295	6927.29	1641.96	257.393	5126888	968.251	0
E05	62	13621	6266.88	1678.69	1972.03	13797908	1012.99	0
E05	63	11808	8321.86	1768.43	1054.47	16068515	1360.82	1
E05	64	6084	6169.15	1756.85	304.263	5143583	845.428	0
E05	65	5158	7687.51	1840.52	1927.88	4572659	886.518	0
E05	66	10163	8911.24	1871.58	524.113	13273308	1306.04	0
E05	67	7277	7402.18	1885.4	1741.19	8319602	1143.27	0
E05	68	5535	8172.15	1961.19	1893.71	5476309	989.396	0
E05	69	7275	8870.34	2004.57	667.555	10765281	1479.76	0
E05	70	6164	4112.54	2010.32	45.9648	5184352	841.069	0
E05	71	7375	5315.31	2017.56	1401.04	3733399	506.224	0
E05	4	5993	5028.28	120.688	554.208	5568406	929.152	0
E05	5	10672	4090.8	195.387	125.083	4895840	458.756	1
E05	6	7760	10640.4	274.669	1093.66	13089475	1686.79	0
E05	7	10179	4979.1	324.557	466.474	7150034	702.43	2
E05	8	8917	10647.7	385.31	885.228	17358245	1946.65	0
E05	9	9730	2967.51	388.236	66.8656	1378850	141.711	0
E05	10	9416	3387.98	419.325	278.463	1435555	152.459	0
E05	11	9682	6716.69	448.686	1055.56	8121761	838.852	0
E05	12	8557	4646.72	460.253	760.701	7500809	876.57	1
E05	13	16912	2576.38	493.745	1715.47	9238589	546.274	1
E05	14	11459	3864.99	591.005	488.664	2395882	209.083	0
E05	15	11537	4119.84	587.413	253.317	8450030	732.429	3
E05	16	8065	5205.67	581.156	750.268	7623546	945.263	0
E05	17	10342	5891.27	644.998	939.672	8111888	784.364	1
E05	18	7574	4881.45	643.031	1301.51	5333901	704.238	2
E05	19	10892	3279.92	648.469	135.754	7658791	703.157	3
E05	20	9865	4083.41	688.272	1455.35	6758370	685.086	0
E05	21	9040	4366.29	674.485	339.233	7944684	878.837	2
E05	22	10204	5738.64	713.006	1965.84	7605083	745.304	1
E05	23	11992	6109.47	792.761	209.997	12677022	1057.12	1
E05	24	9947	4139.95	800.108	1548.85	6717210	675.3	1
E05	25	10803	6597.91	817.461	957.322	10930702	1011.82	2
E05	26	7363	5374.83	830.941	1340.03	5759223	782.184	0
E05	27	9637	7017.75	836.782	1762.93	10906754	1131.76	0
E05	28	9946	6001.91	849.206	650.381	12657836	1272.66	2
E05	29	13014	5255.9	889.116	435.646	10115114	777.249	1
E05	32	9602	6969.88	958.216	724.787	13489350	1404.85	3
E05	33	10960	3495.26	976.1	194.197	7845783	715.856	0
E05	34	10738	6177.93	997.118	1903.23	10037511	934.765	0
E05	35	6571	7102.8	1002.71	1079.42	5061095	770.217	0
E05	36	11033	4977.36	1039.86	1512.09	9162103	830.427	1
E05	37	11815	4447.79	1055.89	326.349	14661245	1240.9	1
E05	38	12148	6097.25	1113.99	926.758	12512653	1030.02	2
E05	39	6683	7771.82	1119.62	1096.01	6982277	1044.78	0
E05	40	9742	13008.4	1131.87	484.43	23752294	2438.13	0
E05	41	9680	4848.66	1161.64	1360.06	6907690	713.604	1
E05	42	11456	5175.19	1227.11	1735.97	8641170	754.292	2
E05	43	14870	3616.69	1250.14	327.559	7433123	499.874	0
E05	44	5661	5326.31	1231.83	2008.73	4613267	814.921	0
E05	45	10924	4468.64	1257.13	1151.54	2007954	183.811	0
E05	46	9148	4578.29	1262.72	1541.52	7801681	852.829	0
E05	47	7255	5172.01	1334.02	33.2744	6706596	924.41	0
E05	48	15197	5488.21	1365.83	139.337	17570190	1156.16	0
E05	49	14094	6297.97	1384.71	1398.02	11874682	842.535	0
E05	50	12445	7431.69	1411.8	1247.59	13597862	1092.64	0
E05	51	9213	5795.66	1425.83	587.875	9398361	1020.12	0
E05	52	13257	6396.81	1465.21	954.055	13387284	1009.83	1
E05	53	8998	4865.69	1454.39	1547.08	8008958	890.082	1
E05	54	10542	5652.51	1468.45	1986.57	8651021	820.624	2
E05	55	8576	4000.24	1477.84	54.1955	7351243	857.188	1
E05	56	7788	6079.13	1493.86	487.654	6654758	854.489	0
E05	57	15347	4493.38	1551.34	374.244	11379684	741.492	0
E05	58	11822	7061.06	1558.57	1441.72	11399677	964.277	0
E05	59	8845	6190.43	1581.14	791.196	11924561	1348.17	1
E05	60	9488	5394.24	1614.08	667.924	9860210	1039.23	1
E05	61	11120	4280.04	1625.3	1258.3	8551267	768.999	0
E05	62	10016	4295.09	1632.32	1681.56	8449317	843.582	2
E05	63	12175	7320.77	1708.17	316.129	12921702	1061.33	0
E05	64	10827	5354.13	1714.92	977.428	10513524	971.047	1
E05	65	13282	3842.24	1749.54	140.936	9118787	686.552	3
E05	67	10906	4727.28	1754.96	587.354	9068969	831.558	0
E05	68	10692	5041.73	1771.62	820.747	9033148	844.851	2
E05	69	12010	3904.94	1779.54	1941.58	8146232	678.287	1
E05	70	8938	5269.68	1781.94	424.203	8084562	904.516	0
E05	71	10503	5009.24	1792.37	1510.94	11824016	1125.78	1
E05	72	9779	5007.07	1794.13	1268.67	7718454	789.289	0
E05	74	11378	5325.88	1841.34	1761.63	9842532	865.049	1
E05	75	9876	5161.03	1851.76	1359.23	8318425	842.287	0
E05	76	10372	5687.99	1876.02	1071.12	9354613	901.91	0
E05	77	11590	4163.36	1891	482.318	7719100	666.014	1
E05	78	9075	5586.84	1886.19	1506.61	7780743	857.382	2
E05	79	9120	4108.11	1898.66	241.923	7110396	779.649	0
E05	80	13397	6094.98	1912.58	1938.85	9295480	693.848	1
E05	81	11624	4371.8	1948.17	694.224	8670722	745.933	0
E05	82	10768	4640.53	1957.11	1420.86	7597243	705.539	1
E05	83	11651	4165.82	1978.82	538.246	9284582	796.891	0
E05	84	11372	4792.68	1961.58	899.965	9326215	820.103	0
E05	85	9301	3116.49	1971.5	60.8213	5811074	624.779	2
E05	86	8389	4260.39	1996.85	313.334	6249438	744.956	3
E05	87	8585	5546.94	2002.1	1289.32	7312165	851.737	0
E05	88	9183	4677.6	2009.15	1635.53	8664107	943.494	0
E05	1	5487	4883.72	29.6025	93.0408	4018483	732.364	0
E05	5	9585	3439.2	139.711	1582.74	1276550	133.182	1
E05	6	7600	3935.9	133.543	368.226	5908855	777.481	0
E05	7	14078	1989.17	250.726	79.3736	6409843	455.309	1
E05	8	9879	6209.39	283.578	655.381	8797923	890.568	0
E05	9	7378	4826.87	326.365	1964.69	6913607	937.057	1
E05	10	5785	5569.83	348.302	419.184	5669724	980.073	1
E05	11	6526	5062.49	367.736	1667.83	6668544	1021.84	1
E05	12	20301	7898	532.653	1139.91	25603468	1261.19	0
E05	13	8975	7769.07	516.433	80.934	10727783	1195.3	0
E05	14	10110	7287.46	638.013	316.46	12441308	1230.59	0
E05	15	22367	7722.45	667.482	1083.59	23694144	1059.33	0
E05	16	8926	3712.41	690.722	126.305	5192443	581.721	1
E05	17	10303	7829.84	707.659	1271.25	11269647	1093.82	0
E05	18	10750	8132.31	739.438	884.148	13317716	1238.86	0
E05	19	10819	6860.61	787.532	1690.93	9866081	911.922	1
E05	20	9077	4515.73	810.641	499.443	7378174	812.843	1
E05	21	9453	4518.33	834.004	356.932	7893850	835.063	0
E05	22	10722	7784.14	892.102	699.236	11705933	1091.77	3
E05	23	12749	6771.65	893.631	1203.46	12860775	1008.77	0
E05	24	7445	4266.12	885.473	54.2795	5451446	732.229	0
E05	25	9955	4813.6	925.89	1075.92	7637518	767.204	2
E05	26	11052	7332.32	925.454	1365.94	12522276	1133.03	0
E05	27	7700	5129.09	972.216	302.188	8057081	1046.37	0
E05	28	9436	5144.01	1014.5	1006.69	9152087	969.912	3
E05	29	7426	6643.13	1054.66	694.03	9678441	1303.32	1
E05	30	8546	4971.19	1126.04	1185.85	7389661	864.692	1
E05	31	9438	5153.91	1199.44	482.23	9156183	970.14	0
E05	32	10570	4294.17	1203.12	1440.71	8474989	801.796	1
E05	34	9077	5669.03	1272.97	946.888	9433033	1039.22	1
E05	35	8025	4945.48	1294.25	1842.21	6051219	754.046	1
E05	36	8037	5563.45	1308.94	1137.32	7852385	977.029	2
E05	37	7506	6617.39	1375.08	610.299	9488415	1264.11	1
E05	38	10076	9245.18	1385.21	384.318	13717174	1361.37	0
E05	39	7198	6942.14	1404.41	837.508	7796119	1083.1	2
E05	41	9356	5313.55	1554.17	1043.25	7734270	826.664	0
E05	42	8613	6108.34	1583.73	723.571	9031045	1048.54	0
E05	43	9454	4544.26	1588.7	337.014	7224906	764.217	2
E05	44	9409	7754.66	1646.29	1226.38	10070881	1070.35	0
E05	45	8147	5057.4	1677.12	1659.36	1299210	159.471	1
E05	46	11206	4031.7	1719.37	1462.85	7542602	673.086	1
E05	47	10308	5548.35	1758.72	971.744	12489191	1211.6	2
E05	48	6963	3039.14	1818.67	29.3457	4454395	639.724	1
E05	49	9077	6463.04	1890.52	1203	12046244	1327.12	3
E05	50	7142	5494.02	2003.01	1016.19	6743389	944.188	2
E05	51	8120	6170.57	2008.17	203.567	9736129	1199.03	1
E05	52	6933	4936.7	2020.56	1931.82	5700099	822.169	0
E05	5	8387	3919.2	75.2485	1589.78	5123512	610.887	0
E05	6	9261	3751.99	180.959	966.504	6546373	706.875	3
E05	8	8141	4331.53	258.309	846.814	5562041	683.213	0
E05	9	9780	3657.94	292.08	1719.33	6306145	644.8	1
E05	10	10297	5248.85	315.496	1493.02	7339518	712.782	0
E05	11	11138	5190.69	385.379	1378.17	7680197	689.549	1
E05	12	10139	4970.23	389.707	1031.02	8454344	833.844	2
E05	13	5559	7549.87	379.885	903.711	5765400	1037.13	0
E05	14	11916	5310.23	393.485	1240	9336019	783.486	0
E05	15	10121	7022.28	489.093	1369.23	8063359	796.696	0
E05	16	9270	4760.22	489.017	1065.78	8244724	889.398	0
E05	17	8092	8265.67	546.149	2006.28	8995575	1111.66	0
E05	18	9223	4240.88	571.77	1564.38	6765211	733.515	2
E05	19	10117	5845.81	583.427	703.796	10051141	993.49	1
E05	20	12818	6375.63	610.157	1256.11	11925274	930.354	3
E05	21	11982	5050.56	663.412	1771.65	7924572	661.373	6
E05	22	12399	5695.33	662.691	1572.48	9138799	737.059	0
E05	24	7503	9550.78	776.372	966.451	10266907	1368.37	0
E05	25	9434	4834.7	786.324	1173.32	7283739	772.073	0
E05	26	9833	4278.23	799.972	1438.89	8174670	831.351	0
E05	27	5367	11793.8	800.255	1046.5	9069803	1689.92	0
E05	28	11723	5146.68	815.964	1768.61	7656805	653.144	1
E05	29	11169	6789.87	911.379	1237.08	11388463	1019.65	0
E05	30	8981	3860.08	978.433	1611.19	5547625	617.707	0
E05	31	10810	5573.51	1074.81	1272.81	9438199	873.099	0
E05	32	10260	5791.53	1078.21	1953.77	7180583	699.862	0
E05	33	11252	8625.06	1082.55	996.669	15108848	1342.77	2
E05	34	8512	4433.55	1210.34	1596.35	6636148	779.623	0
E05	35	10661	3678.51	1248.41	1953.32	7382110	692.441	1
E05	36	13006	6448.89	1269.77	1392.52	13554019	1042.14	0
E05	37	16355	8659.09	1343.84	1734.16	16699377	1021.06	0
E05	38	10773	5621.24	1403.33	1544.27	10245663	951.05	0
E05	39	10309	10542.8	1445.22	764.272	16241507	1575.47	0
E05	40	15503	3000.13	1506.21	1927.48	8087733	521.688	0
E05	41	14022	6203.07	1515.39	1411.95	13461258	960.01	0
E05	42	10458	4444.56	1520.39	1743.65	9426738	901.39	1
E05	43	8311	6217.17	1564.27	1099.49	7209032	867.408	0
E05	44	9309	5141.98	1656.56	1269.94	6808347	731.373	0
E05	45	13412	7663.93	1676.61	953.293	18192591	1356.44	0
E05	46	9734	5862.09	1675.94	1116.2	8460595	869.18	0
E05	47	8252	4795.12	1799.27	1855.3	6393411	774.771	0
E05	48	8933	5603.17	1773.39	1192.73	7105187	795.386	0
E05	49	9975	5019.86	1799.39	1018.81	7224933	724.304	0
E05	50	5283	9683.14	1823.88	748.836	5961422	1128.42	0
E05	51	8374	5352.51	1845.42	368.959	11301865	1349.64	4
E05	52	5646	9826.14	1867.44	660.617	6884044	1219.28	0
E05	53	14958	5467.6	1940.34	1764.87	12106716	809.381	1
E05	54	11257	8001.24	1970.69	592.532	12901669	1146.1	0
E05	55	8595	8839.97	1994.69	826.069	9674251	1125.57	0
E05	56	8254	5396.77	1996.9	947.843	6326390	766.464	0
E05	4	11668	4315.59	83.3021	1876.28	7776572	666.487	0
E05	5	10293	4648.44	92.0909	1676.35	6913535	671.673	1
E05	6	7671	4434.92	83.9819	1284.19	4761988	620.778	0
E05	7	6644	5098.72	151.406	1174.7	5184088	780.266	0
E05	8	5652	6559.66	166.325	1900.73	4660876	824.642	0
E05	9	11861	6043.91	194.632	1417.25	10293539	867.847	0
E05	10	18364	4684.5	247.093	1797.04	12167783	662.589	0
E05	11	8741	3970.11	212.865	1637.91	4817433	551.131	1
E05	12	9949	6041.38	236.868	1992.31	8651873	869.622	1
E05	13	9841	7478.87	296.527	986.978	15047571	1529.07	2
E05	14	8503	4514.34	381.761	757.734	5987259	704.135	0
E05	15	11333	4184.4	422.269	1979.96	8059502	711.153	3
E05	17	8075	4878.69	557.09	882.973	6506723	805.786	1
E05	18	9756	5496.7	565.658	204.998	7467247	765.4	0
E05	19	7605	5204.36	625.723	2015.6	6011546	790.473	2
E05	20	8096	4361.23	616.423	1709.07	6062964	748.884	0
E05	21	9878	10705.3	647.335	641.692	16914369	1712.33	0
E05	22	9155	4470.11	694.858	1144.15	8068782	881.352	2
E05	23	9520	4800.61	720.21	47.5577	7734961	812.496	0
E05	24	7913	5454.05	720.104	798.121	7073114	893.86	0
E05	25	10276	4453.07	733.35	918.41	8850348	861.264	2
E05	26	9331	3968.39	786.018	319.249	9446425	1012.37	1
E05	27	9281	5666.63	850.489	106.285	7858113	846.688	2
E05	28	8653	4830.36	884.051	638.711	8492801	981.486	0
E05	29	11240	3885.03	939.153	1650.72	7989267	710.789	2
E05	30	8478	5564.31	960.437	786.475	10122389	1193.96	0
E05	31	9992	3538.65	955.547	1883.84	5812330	581.698	0
E05	32	10765	3583.73	1065.83	1511.76	5832525	541.804	0
E05	33	12518	6112.31	1084.06	218.332	15015476	1199.51	0
E05	34	8756	4010.42	1120.67	1809.68	6962296	795.146	0
E05	35	9682	7163.57	1113.61	373.632	11352192	1172.5	1
E05	36	8060	7419.1	1197.02	457.971	10645212	1320.75	0
E05	37	8348	12188.7	1205.04	1207.85	14582825	1746.86	0
E05	38	13795	3239.3	1249.02	1557.08	8095057	586.811	1
E05	39	28507	6432.61	1253.95	300.981	31762819	1114.21	2
E05	40	11189	7877.77	1288.89	519.411	13823058	1235.41	0
E05	42	12715	6638.14	1301.74	1426.97	12136205	954.479	0
E05	43	9159	4932.47	1334.88	1328.51	6251448	682.547	0
E05	44	10104	10048.9	1351.52	967.444	13738643	1359.72	0
E05	45	11622	4477.39	1436.74	1889.32	7521456	647.174	2
E05	46	14160	3309.35	1455.98	1727.22	7089764	500.69	2
E05	47	9442	4837.33	1436.55	1239.82	9004358	953.649	0
E05	48	10521	6898.29	1468.46	352.451	10396257	988.143	0
E05	49	10224	6079.49	1502.64	94.1663	9163394	896.263	0
E05	50	9699	4217.87	1553.28	1390.07	6790627	700.137	1
E05	52	11209	3802.17	1585.29	1920.91	7550998	673.655	3
E05	53	12080	4674.05	1622.04	1562.95	9739332	806.236	1
E05	54	7744	7895.72	1655.5	832.605	11018171	1422.8	0
E05	55	9700	6286.65	1685.62	1666.42	8561812	882.661	1
E05	57	9849	5729.15	1790	1166.83	9943201	1009.56	0
E05	58	13747	4680.48	1796.25	1339.19	11160742	811.867	0
E05	59	5473	4911.03	1834.15	2019.54	4074401	744.455	0
E05	60	6608	5329.76	1865	99.969	6430194	973.092	0
E05	61	12500	7877.19	1882.6	906.948	15496040	1239.68	1
E05	62	15223	4811.75	1927.97	1467.01	13019441	855.248	3
E05	63	7739	5739.24	1918.05	1633.75	6754092	872.734	0
E05	64	11503	8278.94	1924.17	614.909	12960580	1126.71	1
E05	65	11847	7247.41	1986.07	1252.66	12537386	1058.28	0
E05	66	10068	7322.07	1998.93	409.059	11241839	1116.59	0
E05	67	6354	6915.29	2020.46	1775.74	6102114	960.358	0
E05	68	5724	6455.33	2021.69	594.421	7557075	1320.24	0
E05	5	11580	3332.37	51.8622	1051.22	3032189	261.847	0
E05	6	10627	3467.66	75.7104	861.817	6701032	630.567	0
E05	8	11959	5948.09	104.933	633.741	11446477	957.143	2
E05	9	8655	4196.7	137.329	749.594	5491568	634.497	1
E05	10	10292	3348.93	161.612	1914.86	5431194	527.71	1
E05	11	9117	3592.65	160.076	1758.02	4815999	528.244	0
E05	12	11027	3668.47	163.612	1031.24	6447882	584.736	0
E05	13	12650	5375.73	178.214	1545.71	8905812	704.017	1
E05	14	8347	4727.87	193.752	1127.43	6787397	813.154	0
E05	15	11066	3289.75	231.011	681.683	6133584	554.273	0
E05	16	14263	2840.48	256.761	310.451	8394359	588.541	0
E05	17	12025	5890.65	276.284	1182.63	10370432	862.406	1
E05	18	9722	3421.14	278.962	438.471	5614921	577.548	0
E05	19	13249	5318.4	298.698	1427.57	9019959	680.803	0
E05	20	10488	2813.61	316.467	106.938	5967730	569.006	0
E05	21	9476	3805.2	353.884	1989.61	1510374	159.389	2
E05	22	9817	3861.89	377.818	925.532	6682161	680.672	0
E05	23	8428	4024.61	403.827	552.307	5785801	686.498	2
E05	24	7710	5140.13	405.104	1472.66	5137127	666.294	0
E05	25	9538	3701.53	421.286	1682.21	5647090	592.062	0
E05	26	8226	4187.17	454.143	1261.32	4680078	568.937	0
E05	27	7088	5416.91	467.488	1394.06	4599658	648.936	0
E05	28	9141	3402.71	478.784	106.948	5664632	619.695	1
E05	29	13517	5255.06	494.29	397.323	10302042	762.154	0
E05	30	9903	3509.63	499.788	234.376	5601709	565.658	0
E05	31	9572	3997.13	510.749	1069.44	5556512	580.496	1
E05	32	8939	3785.08	564.502	1870.18	5308989	593.913	0
E05	34	10098	3531.37	625.62	276.077	5475703	542.256	1
E05	35	8806	4402.9	675.163	524.694	6283565	713.555	0
E05	36	8620	6132.68	686.729	1314.84	8743905	1014.37	1
E05	37	8427	5029.5	698.547	739.674	7153506	848.879	0
E05	38	7543	4032.72	692.678	115.551	4618229	612.254	0
E05	39	7806	5171.46	744.604	397.791	7129868	913.383	2
E05	40	8212	5265.83	787.591	1185.76	7875231	958.991	0
E05	41	8604	3355.63	825.055	2012.12	6014229	699.004	0
E05	42	10504	10037	822.885	1075.54	16322047	1553.89	0
E05	43	8448	4620.86	843.395	273.761	7119449	842.738	0
E05	45	6893	6893.91	964.204	700.423	7198872	1044.37	0
E05	46	8392	4459.67	982.999	1461.15	7006136	834.859	1
E05	47	10099	7320.77	988.58	880.925	9094446	900.529	2
E05	48	12248	3100.43	1115.97	1860.37	6737062	550.054	0
E05	49	6159	8534.1	1142.39	1122.02	9504213	1543.14	0
E05	50	12000	5652.59	1167.4	1708.63	9524771	793.731	1
E05	52	9332	8601.58	1187.64	243.5	13273507	1422.36	0
E05	53	6042	7769.84	1181.79	1210.39	7158138	1184.73	0
E05	54	7854	3874.63	1210.22	43.883	6176469	786.411	0
E05	55	10266	5597.69	1233.08	2002.08	8276801	806.234	0
E05	56	14434	5554.15	1245.57	1418.68	16214756	1123.37	0
E05	57	12815	7948.87	1412.84	859.571	14238302	1111.07	1
E05	58	7174	6006.89	1406.48	264.101	6690537	932.609	0
E05	59	9489	3984.49	1454.64	1620.71	6281192	661.945	0
E05	60	9958	6254.03	1447.79	650.336	10876807	1092.27	2
E05	61	8651	3987.48	1453.72	87.63	6247330	722.151	1
E05	62	9848	4648.05	1459.39	1235.4	7205635	731.685	2
E05	63	11801	3348.12	1473.77	1908.72	6945195	588.526	0
E05	64	11205	6669.36	1512.13	1056.72	9044177	807.155	2
E05	65	11739	7956.82	1574.03	1347.09	11743626	1000.39	0
E05	66	9281	5481.94	1573.01	432.046	8545704	920.774	2
E05	67	9970	4162.96	1591.02	1798.67	7097720	711.908	0
E05	68	7654	4062.96	1622.71	2002.9	4968142	649.091	0
E05	69	10731	5039.35	1661.76	582.484	9541247	889.129	2
E05	70	12202	6337.77	1719.04	242.385	11214645	919.083	0
E05	71	9494	5085.54	1716.09	959.542	8043991	847.271	1
E05	72	9066	5369.56	1758.06	1175.29	7530451	830.626	2
E05	74	9713	5589.55	1804.7	1445.42	6829326	703.112	0
E05	75	8836	4854.11	1815.33	1724.21	6342954	717.854	0
E05	76	10832	5185.72	1834.06	1882.8	7969150	735.704	0
E05	77	11612	8565.8	1829.49	711.843	11425331	983.924	2
E05	78	11212	6589.97	1937.66	891.088	10044881	895.904	1
E05	79	8561	5480.3	1931.49	603.019	7312196	854.129	1
E05	80	6546	5498.7	2011.37	730.665	6172669	942.968	2
F05	1	6332	3794.13	31.3786	493.357	4070586	642.859	0
F05	2	5041	7521.66	32.9149	942.768	5375636	1066.38	0
F05	4	7551	4422.6	54.2275	1792.52	4771544	631.909	0
F05	5	9088	3823.15	56.8836	1337.33	5448028	599.475	1
F05	6	12225	4207.27	66.6865	182.48	6459566	528.39	2
F05	7	10442	6162.13	113.238	688.55	9956600	953.515	1
F05	8	9232	3733.31	128.133	1211.47	5755846	623.467	1
F05	9	9883	3623.5	165.168	1025.82	7283312	736.954	1
F05	10	7329	2981.22	162.694	45.0666	3692816	503.864	2
F05	11	8671	3711.88	244.114	1660.71	1415101	163.199	1
F05	12	11103	4331.72	252.486	359.62	7521890	677.465	2
F05	13	10666	6154.95	316.42	915.358	8068371	756.457	0
F05	15	10463	5404.63	349.045	195.386	7240187	691.98	0
F05	16	9711	4793.2	393.906	495.797	7118390	733.023	3
F05	17	10844	5503.25	387.968	726.943	7460580	687.992	0
F05	18	11566	6090.72	412.93	1232.3	10284959	889.241	0
F05	19	6670	3240.6	441.589	32.6882	4635293	694.946	0
F05	20	9855	4558.67	528.459	619.707	9219430	935.508	3
F05	21	12841	5839.09	559.236	909.561	10902058	849.004	0
F05	22	9228	3477.87	567.859	281.52	5378464	582.842	1
F05	23	10453	4179.22	596.856	1105.03	8987025	859.756	1
F05	24	7894	3706.67	595.638	50.9961	6461886	818.582	0
F05	25	9596	3694.79	649.323	1889.74	5705817	594.604	2
F05	26	10172	3418.59	658.156	1716.77	1665566	163.74	2
F05	27	9464	4266.39	661.398	1353.29	7656285	808.99	2
F05	28	8264	4321.28	747.151	1570.34	5939864	718.764	0
F05	29	10424	7536.28	752.953	724.691	10334355	991.4	0
F05	30	9816	4432.27	775.234	1277.2	7910045	805.832	2
F05	31	12717	4257.44	776.512	1081.09	13602190	1069.61	1
F05	33	8150	3760.07	793.896	115.388	5017081	615.593	1
F05	34	8139	6184.09	876.689	854.102	8530266	1048.07	2
F05	35	9113	5489.86	913.569	1395.4	8681918	952.696	1
F05	36	8710	4114.35	927.274	1614.4	6195402	711.298	2
F05	37	8713	5099.09	960.239	410.905	10237285	1174.94	0
F05	38	9168	5035.82	1002.88	1904.41	6884518	750.929	4
F05	39	10552	6877.77	1105.55	1221.29	10655407	1009.8	2
F05	40	10324	9257.5	1128.51	962.6	12321963	1193.53	0
F05	42	11922	7609.72	1168.13	1419.47	14133275	1185.48	1
F05	43	10144	4980.74	1233.38	1123.25	8347743	822.924	2
F05	45	6806	6852.38	1259.94	410.265	9217924	1354.38	1
F05	46	7183	6496.59	1310.88	1025.33	6496263	904.394	0
F05	47	10613	6797.88	1408.08	1981.66	9009990	848.958	2
F05	48	6685	7181	1425.73	955.913	6226992	931.487	0
F05	49	11656	6560.13	1463.06	1766.88	10138970	869.85	0
F05	50	12159	6872.51	1508.36	1191.23	13148549	1081.38	2
F05	51	13562	3844.6	1522.33	1324.59	10040839	740.366	2
F05	52	10659	4796.37	1526.48	644.518	9820424	921.327	1
F05	53	9702	4350.06	1544.58	1940.2	6946245	715.96	0
F05	55	12021	9450.39	1611.14	887.142	22234581	1849.64	2
F05	56	13581	6067.39	1647.1	1752.29	9858293	725.889	0
F05	57	5546	3465.64	1655.59	27.7223	3524839	635.564	1
F05	58	11575	4189.88	1709.36	1874.8	2063918	178.308	4
F05	59	15311	4329.06	1744.02	1428.14	3597098	234.936	1
F05	60	11713	7744.43	1764.7	1582.28	9630900	822.24	0
F05	61	13251	7709.44	1776.94	1287.91	14923979	1126.25	0
F05	62	11825	8443.6	1801.59	1684.96	13700687	1158.62	1
F05	63	10074	4716.28	1823.85	1091.96	6641136	659.235	1
F05	64	9793	4148.64	1818.98	316.407	6058427	618.649	2
F05	66	9827	5404.82	1892.08	1351.81	8170442	831.428	0
F05	67	6799	3865.22	1985.95	29.4962	1143885	168.243	2
F05	68	10258	4336.78	1984.94	1817.19	1629253	158.828	1
F05	69	10965	9727.9	1983.25	1188.39	15566992	1419.7	2
F05	70	9426	4893.63	2004.27	1337.13	1915887	203.256	0
F05	71	8590	4087.65	2005.76	310.741	7127169	829.705	2
F05	2	5203	3573.84	22.3092	719.988	3206448	616.269	0
F05	3	5804	3477.61	27.6969	1053.9	1085027	186.945	1
F05	5	12172	2931.32	54.927	1566.2	6029893	495.39	1
F05	6	11257	3209.43	61.3254	1318.39	6302727	559.894	2
F05	7	12800	5516.85	92.8193	917.657	9671160	755.559	0
F05	8	9169	3202.39	97.5657	193.477	4657420	507.953	0
F05	9	11395	6259.71	131.587	1101.57	10390572	911.854	0
F05	10	10802	5047.6	138.634	1868.68	6272131	580.645	1
F05	11	10140	3339.46	172.022	320.189	4932872	486.477	1
F05	12	8901	3869.39	192.613	422.424	2815853	316.352	0
F05	13	10862	4412.72	208.063	558.14	6529888	601.168	1
F05	14	6747	4659.18	267.793	1469.14	4218427	625.23	0
F05	15	7771	3962.34	289.542	174.237	4980585	640.919	0
F05	16	13609	5272.71	320.106	706.538	11018710	809.663	0
F05	17	7732	4105.89	328.274	341.743	1835289	237.363	0
F05	18	10647	6168.07	384.502	1894.43	9935089	933.135	1
F05	19	7615	4328.89	391.896	1650.63	4402637	578.153	0
F05	20	5060	9138.02	387.929	826.046	8416311	1663.3	0
F05	21	8853	6486.27	423.149	73.9142	6930664	782.86	1
F05	22	9496	4027.66	428.985	995.662	7306497	769.429	0
F05	24	8190	4233.82	460.621	228.322	5536038	675.951	0
F05	25	8619	5206.22	506.562	307.036	7049334	817.883	1
F05	26	13954	5605	529.935	423.453	13523667	969.161	0
F05	27	14839	4707.28	532.652	626.815	12188322	821.371	0
F05	28	9763	4118.3	587.208	882.007	7113727	728.642	0
F05	29	11139	5380.05	652.66	1843	7284486	653.962	0
F05	30	11917	3666.81	668.03	1243.48	7131484	598.429	0
F05	31	11343	6318.26	659.79	568.89	11896853	1048.83	1
F05	32	9742	4684.34	722.437	1062.61	11017761	1130.95	0
F05	33	13027	6312.97	755.487	608.528	13071866	1003.44	3
F05	34	8780	4917.88	744.178	772.032	5468603	622.848	0
F05	35	7020	3572.75	780.792	34.3261	1029224	146.613	1
F05	36	8312	9674.12	783.551	195.944	10865580	1307.22	0
F05	37	6104	6516.19	781.84	293.825	6612941	1083.38	0
F05	38	8675	4859.58	830.09	1197.34	6319895	728.518	0
F05	39	6388	6666.58	857.522	338.31	7320868	1146.03	0
F05	40	12393	7424.12	912.507	944.354	13905618	1122.05	0
F05	41	9521	4986.12	919.499	1366.79	9212961	967.646	2
F05	42	8287	5575.89	949.513	613.785	6428465	775.729	1
F05	43	9997	4009.55	966.582	194.875	2488814	248.956	2
F05	44	11421	7711.71	985.942	456.805	13931156	1219.78	1
F05	45	5882	5598.06	980.566	1568.66	5574098	947.654	1
F05	46	8863	5058.75	994.051	1094.19	6548644	738.874	1
F05	47	10104	4242.08	1088.6	141.399	8817917	872.715	2
F05	48	11218	7886.88	1124.91	484.226	13062629	1164.43	2
F05	49	10199	4669.49	1145.05	324.523	10843266	1063.17	2
F05	50	10311	6572.48	1156.13	1595	8835295	856.881	0
F05	51	12737	6617.56	1270.17	1421.04	12769938	1002.59	0
F05	52	11575	5819.51	1261.89	85.694	12959304	1119.59	0
F05	53	15516	6464.59	1286.32	468.44	18694878	1204.88	5
F05	54	24370	7427.23	1332.77	752.714	26849700	1101.75	3
F05	55	7342	5897.62	1304.11	1125.19	6366782	867.173	0
F05	56	5322	3446.17	1321.21	643.009	3947441	741.721	1
F05	57	10364	6642.2	1388.53	928.08	11663853	1125.42	1
F05	59	10202	3957.8	1454.69	1483.84	5840517	572.487	3
F05	60	11000	3706.93	1468.97	1682.12	1711876	155.625	3
F05	61	12203	7072.33	1482.45	1314.96	14000882	1147.33	0
F05	62	11221	5604.33	1489.41	943.419	10482727	934.206	3
F05	63	10004	5386.81	1586.5	461.051	2145108	214.425	0
F05	64	9787	5031.99	1627.2	762.666	7578004	774.293	3
F05	65	10199	5965.91	1625.46	1110.87	9455991	927.149	3
F05	66	7293	5747.51	1636.72	1625.36	6415074	879.621	3
F05	67	10910	5276.34	1654.91	950.648	8369037	767.098	5
F05	68	9059	4866.32	1674.25	1425.48	6354000	701.402	1
F05	69	12005	8654.71	1685.98	554.209	19175556	1597.3	0
F05	70	8883	5251.89	1711.28	1878.97	8198529	922.946	3
F05	71	8351	5431.14	1734.92	1736.98	6891428	825.222	1
F05	72	10111	5380.96	1765.2	959.68	9811163	970.345	1
F05	73	5319	11061.8	1760.96	1220.75	8387773	1576.95	0
F05	74	5302	11510.3	1763.54	1131.73	9376272	1768.44	0
F05	75	8543	5132.29	1782.32	1534.46	6787576	794.519	2
F05	76	9143	7296.12	1809.18	263.808	11660185	1275.31	1
F05	77	12446	7733.69	1849.8	1328.13	12925970	1038.56	4
F05	78	9257	3161.47	1877.42	55.0663	5963729	644.24	0
F05	79	11107	3918.68	1918.59	1692.92	7256665	653.342	1
F05	80	9784	4406.55	1909.82	1923.27	5793207	592.11	5
F05	81	13814	6806.3	1931.4	1117.63	11712836	847.896	1
F05	82	6823	5872.28	1969.84	1505.26	5132235	752.196	0
F05	2	8381	5273.68	34.4453	479.842	6359064	758.748	0
F05	6	9358	3590.47	59.1695	1561.93	5528397	590.767	0
F05	7	8933	7062.72	49.1023	1888.52	6349460	710.787	0
F05	8	7207	4994.33	47.0065	1040.05	5204029	722.08	1
F05	9	13323	5478.05	92.6643	853.693	10279870	771.588	0
F05	10	8145	4547.34	78.3541	724.159	4357971	535.049	0
F05	11	8422	4130.27	112.828	1147.14	4813000	571.479	0
F05	12	13535	4042.09	164.1	150.99	8184110	604.663	0
F05	13	10909	6426.64	158.983	948.901	9391203	860.867	0
F05	14	9368	3845.23	192.471	1479.64	5813999	620.623	0
F05	15	9354	3995.4	198.343	1195.49	5699051	609.264	1
F05	16	8896	4236.62	197.594	716.385	5235222	588.492	1
F05	17	11584	5832.5	214.786	1674.06	8821945	761.563	1
F05	18	7479	9978.52	213.827	553.334	9483093	1267.96	0
F05	19	8141	10954.2	216.726	1368.46	12351731	1517.23	0
F05	20	12187	3165.62	298.54	1783.27	7019402	575.975	0
F05	21	8638	4005.43	300.483	1009.58	5130461	593.941	1
F05	22	6987	4306.37	353.057	203.802	4925673	704.977	1
F05	23	12652	5528.54	379.114	709.992	10755385	850.094	0
F05	24	12917	3547.81	388.004	1582.45	8415416	651.499	1
F05	25	11761	3284.47	512.678	1632.42	5640633	479.605	0
F05	26	9598	3778.53	498.951	1897.32	5885596	613.211	1
F05	27	10389	3831.85	507.048	1516.17	5997819	577.324	1
F05	28	10099	3894.47	504.463	509.873	1565559	155.021	3
F05	29	6848	4588.9	518.19	172.412	5512119	804.924	0
F05	30	6755	5691.83	512.185	818.943	4957708	733.932	0
F05	31	10362	8297.85	536.604	1276.92	12300188	1187.05	1
F05	32	10340	3812.13	557.519	971.307	6598576	638.16	1
F05	33	14737	5439.3	607.514	620.865	10376220	704.093	2
F05	34	6680	6131.67	621.433	761.473	4916141	735.949	0
F05	35	10630	4325.05	652.5	1494.56	5861635	551.424	0
F05	36	13406	4239.12	672.408	1664.72	8756115	653.149	1
F05	37	12413	5986.09	691.456	1777.72	9586399	772.287	1
F05	38	9545	4068.74	722.5	317.648	7374284	772.581	1
F05	39	11881	7239.01	720.067	1096.63	10798482	908.887	1
F05	40	10004	4371.51	724.513	1338.26	8005058	800.186	0
F05	41	12997	6072	742.542	454.331	11786739	906.882	2
F05	42	15428	5720.7	777.034	663.56	11592803	751.413	1
F05	43	7086	10927.8	776.199	1880.32	8335409	1176.32	0
F05	44	10458	3970.45	810.401	1485.7	7401263	707.713	1
F05	45	6413	6809.92	866.327	965.796	5393471	841.022	0
F05	46	11514	5645.1	883.356	803.712	11655074	1012.25	0
F05	47	9305	4123.57	880.856	259.824	8081206	868.48	3
F05	48	14257	4328.85	910.892	1832.42	9877396	692.81	0
F05	49	11888	5302.73	928.288	561.47	11921942	1002.86	2
F05	50	10522	5762.94	976.465	1395.75	7590899	721.431	1
F05	51	6465	6656.09	963.832	1019.11	5665477	876.331	0
F05	52	13173	3599.16	990.231	1697.55	6443787	489.166	1
F05	53	11276	8539.47	1049.34	712.61	11600720	1028.8	0
F05	54	11508	3257.26	1065.1	1919.25	5704997	495.742	1
F05	55	11622	4942.64	1107.83	1581.27	6475061	557.138	0
F05	56	11534	8518.91	1164.06	567.729	12496243	1083.43	1
F05	57	10866	3812.67	1175.11	1836.33	7606740	700.05	2
F05	58	10890	6291.63	1162.15	177.741	10726786	985.012	1
F05	59	10664	7847.91	1204.01	447.853	11630510	1090.63	4
F05	60	8633	4648.39	1231.97	1289.92	7352399	851.662	0
F05	61	9228	6761.42	1260.83	1487.06	7921489	858.419	1
F05	62	14493	3952.94	1321.96	1952.27	7671704	529.339	2
F05	63	9938	3837.07	1355.66	96.2753	8639813	869.371	3
F05	64	12177	8088.78	1393	583.529	12168372	999.291	1
F05	65	9658	4461.44	1410.89	367.433	3743798	387.637	1
F05	66	11355	8947.7	1413.34	782.108	14769578	1300.71	0
F05	67	8776	4735.65	1435.92	1525.06	5986001	682.088	1
F05	68	9046	5581.9	1445.71	1995.07	6629341	732.848	0
F05	69	8920	4621.91	1555.3	1400.1	7087057	794.513	3
F05	70	9727	5050.97	1578.16	592.747	8183845	841.353	0
F05	71	12196	6995.23	1597.33	388.214	10773922	883.398	4
F05	72	9223	4700.04	1622.89	1589.38	6477086	702.275	2
F05	73	6377	3938.84	1724.37	2015.37	3264748	511.957	0
F05	74	10494	8254.34	1753.7	454.516	11591431	1104.58	0
F05	75	9256	14383.9	1754.84	1030.09	18738897	2024.51	0
F05	76	11244	6731.48	1769.22	312.656	9028442	802.956	3
F05	77	14833	4386.83	1779.9	1838.35	2565882	172.985	3
F05	78	9362	5386.47	1798.36	164.292	7593941	811.145	2
F05	79	11188	4044.85	1854.96	1942.52	6390188	571.164	0
F05	80	12838	6894.31	1901.15	1619.45	11786289	918.078	0
F05	81	6694	7166.07	1891.55	1410.68	5578412	833.345	1
F05	82	11675	4557.07	1967.35	1773	8181342	700.757	0
F05	83	16848	4799.67	2002.21	1924.22	11598693	688.431	0
F05	84	5812	3141.99	2016.9	138.808	817085	140.586	0
F05	85	5736	7529.17	2014.36	1331.47	4606168	803.028	0
F05	1	7739	2618.76	30.701	150.746	3255771	420.697	0
F05	6	7289	4612.85	40.6447	1860.29	5770702	791.7	0
F05	7	7837	4165.45	46.6499	1991.87	5449909	695.408	1
F05	8	10702	3409.1	71.3869	617.913	5582019	521.587	0
F05	9	12596	4332	120.025	735.306	7932219	629.741	1
F05	10	11366	3398.36	134.564	1191.59	4218324	371.135	1
F05	11	11366	4564.23	156.487	1310.57	7542313	663.586	2
F05	12	11199	3556.26	164.666	496.21	6161862	550.215	0
F05	13	7969	4095.99	198.234	1912.59	5038935	632.317	0
F05	14	9195	3824.91	227.425	344.531	5901209	641.785	2
F05	15	9778	6236.87	238.943	1420.88	7086002	724.688	2
F05	16	7332	5019.5	270.674	496.072	5037502	687.057	0
F05	17	11436	6676.76	284.233	988.984	10780805	942.708	0
F05	18	13308	5619.88	310.811	1233.21	10525493	790.915	0
F05	21	8288	4631.86	342.396	425.547	6437705	776.75	0
F05	22	11730	6501.46	352.426	795.273	11072891	943.98	2
F05	23	9430	4390.32	382.878	527.103	6492999	688.547	0
F05	24	8911	3793.81	393.989	1587.59	4892879	549.083	1
F05	25	10740	7442.65	397.182	916.717	11032228	1027.21	0
F05	26	8749	5633.04	413.349	231.507	6827785	780.407	1
F05	27	12561	6290.77	423.937	1188.28	10519839	837.5	1
F05	28	15298	5044.06	474.928	1384.71	8846354	578.269	1
F05	29	10712	4986.9	477.419	326.818	7616765	711.05	0
F05	30	9031	4808	483.926	1833.97	7150751	791.801	2
F05	32	5201	7561.16	514.944	684.644	4613390	887.02	3
F05	33	10305	5099.35	533.602	425.15	7767084	753.72	0
F05	34	15032	5229.01	553.769	1139.8	12222390	813.091	5
F05	35	8913	3858.93	533.657	1671.72	4499393	504.812	0
F05	36	12437	6957.63	593.131	779.868	11804358	949.132	4
F05	37	15109	5331.39	618.491	1304.33	12432494	822.854	1
F05	38	9272	5252.52	650.847	486.285	7464846	805.096	1
F05	39	12807	6604.51	659.443	615.141	15309208	1195.38	0
F05	40	8402	3856.15	650.351	243.978	2141366	254.864	1
F05	41	12919	6549.92	689.345	922.406	10640028	823.595	3
F05	42	12553	7338.68	738.946	1121.45	14072551	1121.05	0
F05	43	10370	4421.24	768.78	517.354	8200210	790.763	1
F05	44	9941	3702.34	795.579	1852.98	5974640	601.01	1
F05	47	9737	5416.89	864.093	641.239	9726923	998.965	0
F05	48	12306	7445.27	862.99	745.686	14266785	1159.34	0
F05	49	13372	5161.92	879.2	1331.83	10059045	752.247	2
F05	50	13371	3481.42	867.975	1462.93	2468404	184.609	3
F05	51	9918	4379.47	951.042	454.682	7159908	721.91	0
F05	52	14678	5391.46	970.504	1115.24	13188899	898.549	3
F05	53	13696	2909.59	981.493	1930.77	2049205	149.621	0
F05	54	16104	5267.58	1036.91	980.43	15444669	959.058	1
F05	55	13410	7349.01	1035.94	691.977	18027652	1344.34	0
F05	56	12731	3244.28	1039.57	1719.5	1945477	152.814	1
F05	57	14145	5857.73	1064.9	1556.09	10304289	728.476	0
F05	58	12026	5763.55	1080.79	1290.27	10201404	848.279	2
F05	59	9128	3952.93	1121.78	1950.37	4780832	523.755	0
F05	60	12058	6432.97	1156.4	1429.77	8478539	703.146	5
F05	61	7665	6760.12	1173.17	700.644	6826141	890.56	0
F05	62	7008	6206.11	1184.9	551.691	5383978	768.262	0
F05	63	11607	6939.06	1201.92	1575.59	8940017	770.226	3
F05	64	15053	6598.84	1206.95	1101.47	13794357	916.386	0
F05	65	13085	7762.01	1237.86	932.822	13452905	1028.12	0
F05	66	10013	4005.54	1238.52	1887.73	6899852	689.089	1
F05	67	12954	5985.73	1294.34	1675.53	8922340	688.771	0
F05	68	11497	3522.34	1305.17	149.84	8457476	735.625	1
F05	69	14999	6838.6	1325.97	1214.86	15503311	1033.62	0
F05	70	13476	6680.87	1358.06	1360.74	11686923	867.24	0
F05	71	13443	6397.31	1351.02	890.359	11091608	825.084	2
F05	72	12035	6749	1365.02	1545.17	10089630	838.357	0
F05	73	16247	5406.6	1399.81	1966.6	14376089	884.846	0
F05	74	11919	5235.9	1388.64	1051.39	11864429	995.422	1
F05	75	11413	7886.05	1381.64	337.237	12890402	1129.45	0
F05	76	9999	4570.85	1397.83	231.327	8216308	821.713	0
F05	77	12195	4683.35	1395.79	539.717	8256705	677.057	2
F05	78	12782	6384.21	1411.16	686.16	11515120	900.886	0
F05	80	12584	4697.9	1477.78	925.442	10218338	812.01	1
F05	81	6859	6477.66	1473.26	1468.34	4655626	678.762	0
F05	82	10553	4409.45	1498.33	1237.98	5686111	538.815	0
F05	83	13067	5946.06	1521.72	132.742	11140149	852.541	0
F05	84	10695	4666.19	1528.69	1345.09	7109839	664.782	1
F05	85	7813	11702.2	1505.78	1718.25	11089270	1419.34	0
F05	86	16436	6099.48	1559.36	1965.82	28860144	1755.91	2
F05	87	12299	4488.58	1558.66	485.828	8801666	715.641	2
F05	88	13067	7029.58	1563.14	647.924	11713253	896.4	0
F05	89	12405	7064.52	1583.32	287.124	14477762	1167.09	0
F05	90	6911	6718.85	1583.55	1442.36	5937009	859.067	1
F05	91	11537	5260.02	1667.53	845.934	8717313	755.596	0
F05	93	13888	7955.42	1699.69	666.463	14964445	1077.51	0
F05	94	12320	4631.67	1723.35	1039.49	9952168	807.806	0
F05	95	14733	3947.18	1724.21	172.838	9827097	667.013	4
F05	96	7576	3516.86	1734.18	36.1753	4294168	566.812	0
F05	97	12020	7043.74	1754.42	333.188	11278258	938.291	0
F05	99	11068	5214.57	1765.3	548.839	9926568	896.871	2
F05	100	8845	5968.35	1792.28	1219.59	7290970	824.304	0
F05	101	11887	4611.06	1840.48	728.664	2485692	209.11	1
F05	102	17338	4977.13	1863.64	1689.05	12322847	710.742	0
F05	103	9896	4662.85	1885.51	423.147	7434125	751.225	1
F05	104	11469	7217.09	1955.38	576.008	14203488	1238.42	2
F05	105	12585	7226.78	1963.55	1203.83	11289405	897.052	1
F05	106	9599	5107.19	1963.82	1038.07	6884329	717.192	1
F05	107	9503	4414.55	1989.96	333.072	7283321	766.423	1
F05	108	7804	4036.27	2007.08	215.852	5942181	761.428	0
F05	109	6670	5502.97	2011.38	934.161	4569669	685.108	0
F05	110	5943	3639.91	2013.4	119.641	4319486	726.819	0
F05	111	5691	6660.06	2025.24	459.866	5395407	948.06	0
								0
F05	1	10165	3912.17	52.164	1766.29	6124686	602.527	3
F05	2	8884	3834.48	101.139	1525.65	5323576	599.232	0
F05	3	6924	3795.15	147.324	102.123	4420446	638.424	1
F05	4	9875	3620.38	198.489	1994.67	1465390	148.394	1
F05	5	12920	6004.3	318.969	957.075	15582645	1206.09	2
F05	6	8656	4242.68	329.983	1237.91	5595210	646.397	1
F05	7	11868	5962.14	431.986	1518.38	9068380	764.103	1
F05	9	9380	5262.11	542.821	873.727	7886273	840.754	0
F05	10	11673	5649.92	573.505	1310.27	9203312	788.427	0
F05	11	5918	5074.32	555.321	2002.15	5247330	886.673	2
F05	12	9154	4959.95	588.036	1718.54	5507298	601.627	1
F05	13	10105	3405.06	605.237	221.383	7818528	773.729	0
F05	14	11053	3885.57	658.812	1556.48	7003890	633.664	1
F05	15	11481	6010.18	708.253	643.092	9560088	832.688	0
F05	16	11332	5454.3	702.146	1833.32	6909049	609.694	0
F05	17	11124	7018.14	698.308	1052.29	9945823	894.087	2
F05	18	11699	3604.97	760.949	335.028	9216970	787.843	0
F05	19	11119	7823.44	770.302	543.129	10926391	982.677	1
F05	20	9384	4793.55	798.129	1728.76	6560786	699.146	1
F05	21	11245	8484.4	840.806	455.71	12791406	1137.52	0
F05	22	11419	3805.17	839.357	1299.2	7926569	694.156	2
F05	23	11720	7024.23	948.85	537.373	10322944	880.797	2
F05	24	13212	6422.69	973.147	908.785	8879311	672.064	2
F05	25	10902	7306.24	967.688	275.647	10823123	992.765	0
F05	26	9289	3491.68	943.138	1937.02	4139821	445.669	1
F05	27	11635	8207.39	977.582	389.378	13474816	1158.13	0
F05	28	8702	4750.76	989.25	1404.68	5716667	656.937	2
F05	29	8585	4213.53	1003.68	1578.11	4459283	519.427	1
F05	30	8951	3779.41	1036.15	1768.29	4167105	465.546	0
F05	31	8425	5173.99	1045.75	1153.77	5765130	684.288	0
F05	32	13065	6249.15	1082.2	665.731	11915802	912.04	1
F05	33	8232	5198.79	1075.77	1340.18	5785770	702.839	1
F05	34	21940	7862.94	1132.58	486.066	21925612	999.344	1
F05	35	13090	5557.78	1190.67	1609.1	8132727	621.293	0
F05	36	13604	6969.84	1216.86	935.296	9319151	685.03	0
F05	37	10761	4177.12	1223.67	1303.7	6044384	561.694	2
F05	38	9897	5145.97	1233.95	334.093	9302470	939.928	0
F05	39	11744	8278.1	1300.75	1159.19	13917625	1185.08	0
F05	40	11261	6289.17	1294.99	139.117	9183366	815.502	1
F05	42	14756	7237.01	1324.26	746.116	13338046	903.907	1
F05	43	18553	8471.67	1337.2	560.337	19580327	1055.37	0
F05	45	14724	6929.7	1386.5	951.609	10440524	709.082	0
F05	46	11644	6954.39	1375.12	284.626	11104370	953.656	4
F05	47	12264	7954.06	1387.91	428.361	13330823	1086.99	1
F05	48	10398	3944.43	1376.04	1536.31	5958366	573.03	2
F05	49	9324	4022.24	1438.98	76.076	7354291	788.748	0
F05	50	12410	5511.64	1469.07	1787.28	9721554	783.365	0
F05	51	12833	6523.64	1515.55	775.571	8857672	690.226	0
F05	52	10324	4338.81	1503.77	1444.17	6653065	644.427	1
F05	53	9798	5288.36	1510.7	1030.18	7597916	775.456	0
F05	54	11673	8027.6	1534.26	630.015	11479548	983.427	1
F05	56	10854	5414.43	1555.58	502.53	9478433	873.266	1
F05	57	9374	5639.63	1566.8	1119.25	7597157	810.45	0
F05	58	12950	6354.38	1568.59	363.496	11659645	900.359	1
F05	59	9234	5360.01	1585.57	1294.72	7044633	762.902	1
F05	60	7613	5332.32	1625.82	1991.24	4913693	645.435	0
F05	61	6948	5277.29	1651.96	208.637	5076546	730.649	0
F05	62	11944	6613.27	1698.37	1295.41	8159123	683.115	1
F05	63	10016	4950.97	1692.39	401.349	8193477	818.039	0
F05	64	7259	4817.57	1707.38	1873.72	1154502	159.044	0
F05	65	12225	2549.51	1758.58	42.2089	6659059	544.708	0
F05	66	21077	7186.4	1810.49	832.885	16476406	781.724	0
F05	67	15444	7327.35	1794.91	572.361	20768939	1344.79	0
F05	68	7758	5275.77	1791.85	300.132	6098149	786.047	0
F05	69	10364	4535.5	1828.58	1579.96	5949115	574.017	0
F05	70	9913	5717.46	1869.58	978.628	6707538	676.641	0
F05	71	13596	4486.45	1904.4	1079.74	8696519	639.638	0
F05	72	8497	4197.67	1907.45	220.355	6250881	735.657	1
F05	73	9255	4816.41	1905.78	1690.53	7244210	782.735	1
F05	74	10181	4297.02	1947.81	401.403	7432418	730.028	1
F05	75	8354	4725.31	1989.03	1975.25	4569330	546.963	0
F05	76	10767	7754.44	1999.49	1450.31	11494609	1067.58	0
F05	77	5172	4527.73	2025.78	720.461	3047358	589.203	0
								0
F05	3	7886	4980.98	31.5755	466.011	5706075	723.57	0
F05	5	10174	5750.42	140.925	336.932	7094733	697.34	1
F05	6	9788	3516.24	165.539	1636.36	5640632	576.28	0
F05	8	10637	4825.21	187.118	1184.49	7095827	667.089	2
F05	9	8448	2879.01	178.923	145.328	5385456	637.483	0
F05	10	14478	3954.09	273.703	117.454	9501408	656.265	3
F05	11	9095	3806.79	270.132	523.233	4820401	530.006	0
F05	12	9537	3741.5	312.426	1854.54	6098466	639.453	2
F05	14	11710	6158.02	344.863	1057.15	9386158	801.551	2
F05	15	11456	6384.05	347.727	837.965	10549602	920.88	0
F05	16	9826	4982.38	387.984	165.742	6182080	629.155	1
F05	17	8678	4150.53	391.428	623.832	4925026	567.53	0
F05	18	9504	5342.88	388.909	1393.49	6809344	716.471	3
F05	19	9524	3658.3	419.366	392.905	5952878	625.04	0
F05	20	10263	4487.58	427.322	1128.55	7605305	741.041	0
F05	21	12354	5484.67	445.214	1589.89	8757835	708.907	1
F05	23	14194	5448.47	513.546	1460.56	10546224	743.006	0
F05	24	23878	7683.8	558.14	994.554	29510274	1235.88	2
F05	25	11648	4759.19	548.278	1158.11	8191539	703.257	1
F05	26	9467	3704.24	543.846	1850.27	4840239	511.275	1
F05	27	9704	6528.04	563.914	261.565	7325790	754.925	1
F05	29	8238	4640.42	559.008	744.545	5752565	698.296	0
F05	30	6408	4504.11	581.826	30.0172	4340684	677.385	1
F05	31	7727	4897.81	577.464	592.082	6060366	784.31	0
F05	32	11960	5727.86	636.439	1617.63	7972065	666.561	0
F05	33	9016	4307.37	632.99	1429.5	4849745	537.904	0
F05	34	9251	4039.35	635.306	408.798	6182778	668.336	0
F05	35	13050	3089.92	669.193	1890.06	7496304	574.429	0
F05	36	11235	3838.35	694.524	1275.56	7203794	641.192	0
F05	37	11043	3753.93	688.955	147.373	7381027	668.39	2
F05	39	12005	3881.13	723.397	708.618	8987923	748.682	0
F05	40	11335	6003.71	770.18	243.81	11995940	1058.31	3
F05	42	8546	3240.73	805.851	43.6907	5775789	675.847	1
F05	43	13281	6779.81	841.201	961.085	13562687	1021.21	0
F05	45	9985	4542.8	842.104	760.506	7489612	750.086	1
F05	46	11557	3397.08	869.241	1499.78	1794291	155.256	4
F05	47	5783	7456.93	872.402	507.049	5441313	940.915	0
F05	48	9727	4160.33	890.134	241.77	7194165	739.608	1
F05	49	5006	9559.75	906.1	1099.4	6221812	1242.87	0
F05	50	5370	7831.72	935.055	421.408	5112268	952.005	1
F05	51	9968	4997.69	953.993	630.164	9402662	943.285	0
F05	52	14021	6040.8	985.85	1258.13	12645063	901.866	0
F05	54	7977	5383.95	988.966	1395.66	6956400	872.057	0
F05	55	9694	4075.79	1047.89	270.235	7655904	789.757	2
F05	56	9793	5213.48	1098.57	562.104	8128659	830.048	0
F05	57	9108	4109.62	1085.48	1730.68	1730357	189.982	1
F05	58	12001	3122.69	1092.34	90.5402	7462320	621.808	1
F05	59	7680	5416.75	1087.96	1414.48	5605305	729.857	0
F05	60	10833	5027.59	1118.99	655.948	9615838	887.643	0
F05	61	10444	4824.45	1134.83	814.577	8127575	778.205	0
F05	62	9289	4674.31	1147.18	418.263	7999541	861.184	1
F05	63	12908	6566.53	1207.86	1358.11	12425523	962.622	0
F05	65	9890	5041.24	1260.61	569.151	9257153	936.011	0
F05	66	12357	6421.3	1259.06	1679.77	11323642	916.375	0
F05	67	9329	4054.92	1269.07	1855.46	2271489	243.487	2
F05	68	13171	7117.37	1324.24	1097.94	13075025	992.713	0
F05	69	14911	7220.37	1314.66	919.162	16072675	1077.91	0
F05	70	7916	4681.2	1325.17	137.435	1604636	202.708	0
F05	71	19858	4667.58	1411.91	1516.28	17266504	869.499	1
F05	72	10728	4358.81	1404.52	1264.17	7631179	711.333	0
F05	73	8132	4915.2	1415.2	1982.92	7151789	879.462	0
F05	74	9261	5480.54	1439.07	659.425	8839808	954.52	1
F05	75	14360	7771.94	1479.04	972.561	16425288	1143.82	0
F05	76	7996	4945.54	1467.86	1755.28	6240937	780.507	0
F05	77	13945	8060.55	1508.81	792.178	16463955	1180.63	0
F05	78	8650	5728.01	1514.45	1193.16	8455407	977.504	0
F05	79	10080	4286.79	1604.26	184.157	8689023	862.006	1
F05	80	11065	9649.91	1628.67	1087.67	14320228	1294.19	0
F05	81	8236	6031.11	1613.4	439.532	8322514	1010.5	1
F05	82	8409	4652.26	1635.94	1822.76	6104575	725.957	2
F05	83	9100	4647.79	1636.61	1516.89	6121316	672.672	0
F05	84	10058	5204.05	1654.78	568.189	8392980	834.458	0
F05	85	12849	8475.26	1701.21	890.296	17054613	1327.31	1
F05	86	5818	9176.8	1679.51	757.601	2240810	385.151	0
F05	87	9438	4540.41	1698.41	1650.82	7125530	754.983	0
F05	88	9331	4890.42	1713.25	370.642	6736696	721.969	0
F05	90	10924	4019.38	1764.78	148.525	7314426	669.574	1
F05	91	9051	5413.27	1771.8	466.504	6659805	735.809	0
F05	92	19150	4599.2	1800.19	1837.24	12055750	629.543	1
F05	93	5866	9310	1777.67	729.041	2258346	384.989	1
F05	94	9681	4691.3	1847.46	1349.82	6681846	690.202	0
F05	95	11481	4779.3	1865.29	562.915	8100881	705.59	1
F05	96	9892	4504.13	1866.9	1980.23	6566186	663.788	0
F05	97	11199	4862.33	1883.41	353.997	10135896	905.072	2
F05	98	10947	6286.14	1894.42	1537.78	9185822	839.118	3
F05	99	8303	5490.59	1904.95	986.159	5343471	643.559	0
F05	101	9476	5800.62	1932.9	1162.82	9356987	987.441	2
F05	102	7619	3831.71	1934.13	53.2843	4959623	650.955	1
F05	103	9851	5084.54	1960.75	807.107	8122921	824.578	0
F05	104	10188	4489.33	1979.9	1837.15	6834456	670.834	3
F05	105	8042	5504.88	2003.19	711.247	7620633	947.604	0
F05	106	6445	5387.21	2015.74	1989.29	4545568	705.286	4
F05	4	9428	4705.32	59.5879	596.071	7877978	835.594	0
F05	5	7721	4817.34	37.5121	731.097	5793016	750.293	2
F05	7	5962	6496.37	30.7278	1155.44	5049897	847.014	0
F05	8	6371	3776.01	26.1529	1808.4	1089136	170.952	3
F05	9	6934	3725.64	48.0942	2000.3	3869266	558.014	3
F05	10	9465	5663.04	49.7955	1376.01	5604462	592.125	2
F05	11	13667	4272.32	104.867	118.411	9103456	666.09	0
F05	12	8954	3773.16	91.5077	1647.38	4987080	556.967	0
F05	13	9206	4761.35	128.823	743.899	5767845	626.531	0
F05	14	11983	4099.72	173.692	515.235	8862329	739.575	3
F05	15	9475	4365.41	166.794	956.963	7638201	806.143	0
F05	16	11220	3205.61	173.017	1948.99	5383260	479.791	0
F05	17	13196	4761.63	182.7	299.811	10426468	790.123	1
F05	18	10239	3781.44	185.082	1303.89	5691370	555.852	0
F05	19	8448	4218.44	179.603	1522.35	5664474	670.511	0
F05	20	20675	4622.49	278.259	1164.65	9981793	482.795	3
F05	21	9772	3713.9	249.481	1429.55	5703939	583.702	0
F05	22	7363	3662.99	244.194	52.7606	4314657	585.992	1
F05	23	9961	7330.38	327.096	827.45	9367607	940.428	0
F05	24	6463	3631.48	339.026	2014	3559011	550.675	0
F05	25	8943	6900.47	348.351	458.866	7556975	845.016	3
F05	26	11950	6419.44	387.224	1723.35	10592528	886.404	0
F05	27	10345	6427.79	385.041	1607.53	7011861	677.802	2
F05	29	10687	4784.36	447.502	954.273	7887047	738.004	0
F05	30	9910	3836.23	464.374	1496.24	5925291	597.91	0
F05	31	9424	4366.47	477.86	1959.41	5877309	623.653	1
F05	32	7087	4660.94	493.521	315.871	5106763	720.582	0
F05	33	5275	4580.72	501.342	36.3329	1032909	195.812	0
F05	34	11610	3345.28	559.009	1187.04	4862010	418.778	0
F05	35	8238	4298.2	567.024	217.138	5255891	638.006	0
F05	36	10710	4646.18	668.851	32.7782	7321293	683.594	0
F05	37	11072	7156.3	658.779	589.98	15227005	1375.27	0
F05	38	10056	6148.18	660.218	1841.85	6698117	666.082	1
F05	39	7419	4915.78	683.658	2010.45	4781633	644.512	1
F05	40	9966	3759.32	688.153	1635.22	1558810	156.413	0
F05	41	15252	4930	725.679	233.988	11961322	784.246	0
F05	42	10818	4702.45	735.601	1037.35	7931050	733.135	2
F05	43	8427	5780.55	781.874	800.202	8709152	1033.48	0
F05	44	5175	3303.33	844.296	2019.83	2468270	476.96	0
F05	45	12740	6867.28	867.905	1232.63	12293185	964.928	1
F05	46	15302	5331.5	878.975	271.719	13174638	860.975	0
F05	47	11146	3039.91	860.426	1792.06	4944428	443.606	0
F05	48	13674	6041.74	896.301	394.065	11789826	862.208	0
F05	49	12924	3001.27	942.082	59.1059	3294557	254.918	1
F05	50	10255	3794.38	922.641	1496.32	6487439	632.612	0
F05	51	11276	8135.08	975.088	640.604	12194041	1081.42	1
F05	52	11472	8126.08	1012.82	752.342	12747769	1111.21	4
F05	53	10900	4362.34	999.666	1719.12	6923090	635.146	0
F05	54	10050	8578.56	1019.52	876.576	11758383	1169.99	2
F05	55	10125	5498.59	1074.26	437.742	8539987	843.456	1
F05	56	7233	5764.11	1065.88	1341.96	5969435	825.306	0
F05	57	10879	4364.8	1113.52	1682.07	7510087	690.329	1
F05	58	7706	5315.48	1131.05	1459.03	5939558	770.771	0
F05	59	8935	4283.36	1131.91	1991.98	5841112	653.734	0
F05	60	13854	5297.94	1161.36	150.706	13918746	1004.67	0
F05	61	11023	6114.62	1189.36	516.095	11120026	1008.8	0
F05	62	6845	6935.47	1252.33	754.911	5411627	790.596	0
F05	63	9532	4480.11	1258.74	1398.07	7159755	751.128	0
F05	65	12720	7656.8	1310.91	891.617	12682608	997.06	1
F05	68	9263	5197.27	1336.61	1137.39	7797458	841.785	0
F05	69	8631	4751.58	1334.02	1734.83	6975450	808.186	0
F05	70	7106	5607.87	1365.36	1912.68	4729580	665.576	1
F05	71	11461	6501.58	1414.75	117.427	13450656	1173.6	0
F05	72	11680	7945.32	1419.72	410.028	13017830	1114.54	2
F05	73	10068	4716.54	1423.41	1814.42	7040934	699.338	0
F05	74	7245	7091.41	1438.48	738.846	7389821	1019.99	0
F05	75	7752	5486.96	1451.13	2002.89	6068239	782.797	0
F05	76	10714	5794.07	1461.21	1659.46	7058622	658.822	0
F05	77	10088	4240.6	1458.16	1363.07	6637231	657.933	0
F05	78	12332	7382.48	1518.36	883.694	11708135	949.411	0
F05	79	11822	6644.32	1516.51	1922.31	8459859	715.603	1
F05	80	10193	5006.45	1515.22	1134.4	7987087	783.585	0
F05	81	10367	5443.74	1580.65	1515.92	6459444	623.077	1
F05	82	9758	6061.62	1590.24	1033.33	9619690	985.826	0
F05	83	10870	7216.33	1598.5	1828.22	8527390	784.489	2
F05	84	8750	4329.55	1630.25	79.5135	6112514	698.573	2
F05	86	10492	7451.96	1640.52	596.838	12030907	1146.67	2
F05	87	16996	5016.68	1724.43	1707.63	12140096	714.291	0
F05	88	9035	5121.05	1747.3	1434.7	1567466	173.488	0
F05	89	16483	5758.82	1803.92	925.581	13712843	831.939	0
F05	90	7432	5891.89	1855.01	571.081	5643351	759.331	0
F05	91	7864	5519.2	1872.97	1565.29	2150710	273.488	1
F05	92	7309	6411.13	1867.69	1264.22	6793523	929.474	1
F05	93	11274	4944.29	1916.16	1993.06	8427291	747.498	0
F05	94	9995	4283.56	1924.25	302.428	8108310	811.237	2
F05	95	9613	4340.42	1964.89	50.5199	6191274	644.052	1
F05	96	8748	4947.91	1980.88	1684.44	2252086	257.44	0
F05	97	6038	5791.77	2011.02	721.77	5601470	927.703	0
								0
F05	2	5791	3456.55	28.3414	1021.48	855533	147.735	0
F05	3	5188	3650.8	20.6635	1696.19	3027486	583.556	0
F05	4	8041	3325.31	42.981	1944.13	4047783	503.393	1
F05	5	7501	4007.24	46.5458	732.526	4698980	626.447	0
F05	6	8746	3958.85	71.8707	1502.65	4121844	471.283	0
F05	7	8718	3241.27	90.7856	358.994	4220092	484.067	2
F05	8	11156	3671.3	186.399	144.435	5647628	506.241	2
F05	9	11865	5512.4	209.026	1887.21	7621023	642.311	2
F05	10	9791	3279.09	246.377	1624.92	3859686	394.208	0
F05	11	9755	6251.68	327.536	1378.13	6815869	698.705	0
F05	12	9219	3735.85	333.78	320.686	4975112	539.659	1
F05	13	10925	5952.73	349.898	1079.12	7381480	675.65	1
F05	14	8717	3833.04	361.931	1987.68	5436325	623.646	1
F05	15	7554	4788.25	358.813	985.663	1369678	181.318	0
F05	16	11070	3683.54	368.468	589.651	10123548	914.503	3
F05	17	9337	3608.92	381.239	236.382	4980321	533.396	1
F05	18	9800	3569.72	403.035	853.324	1418931	144.789	0
F05	20	10842	4117.36	488.808	418.896	5994511	552.897	0
F05	21	12881	5466.75	590.378	1186.63	8890689	690.217	0
F05	22	13558	5782.51	587.124	771.716	11704427	863.286	0
F05	23	9680	6997.96	584.787	270.981	7336563	757.909	0
F05	25	11055	7409.96	695.188	673.212	10456867	945.895	0
F05	26	9103	3747.37	689.393	1970.01	6344437	696.961	0
F05	27	8222	4581.36	683.494	449.642	5047685	613.924	1
F05	28	8265	4712.83	693.915	1452.33	1570050	189.964	0
F05	29	10067	4754.48	733.858	1014.14	10055892	998.897	1
F05	30	12155	4211.14	799.206	222.957	7023719	577.846	4
F05	31	9252	4946.44	821.087	525.673	6916827	747.603	1
F05	32	10864	7382.65	833.337	1179.35	8617946	793.257	0
F05	33	13558	3860.3	850.065	401.878	7483335	551.95	1
F05	34	5267	5860.02	848.393	92.6007	3780752	717.819	0
F05	35	9682	4019.03	911.546	1501.54	5618715	580.326	1
F05	36	9333	4811.33	954.233	1905.7	7544524	808.371	1
F05	37	5240	6554.08	945.015	132.888	4845919	924.794	0
F05	38	11435	5278.74	990.801	749.529	10330272	903.391	0
F05	39	11491	3803.12	1036.03	1344.79	6726485	585.37	1
F05	41	12047	7256.75	1089.02	498.665	9248526	767.704	0
F05	42	7391	5657.16	1091.96	1127.26	4800726	649.537	1
F05	43	10273	4145.24	1121.55	345.814	6272064	610.539	0
F05	45	8039	5705.72	1114.1	979.831	6088292	757.344	0
F05	46	10988	7128.76	1151.13	1849.31	10598085	964.514	0
F05	47	9217	4321.62	1200.3	217.203	5474224	593.927	0
F05	48	7751	6321.11	1209.82	860.927	6851263	883.92	0
F05	49	12904	3155.61	1279.3	106.931	6763655	524.152	1
F05	50	10745	4729.9	1264.87	514.016	8333753	775.594	0
F05	52	12502	9230.1	1317.15	758.371	17085351	1366.61	0
F05	53	8871	4319.73	1331.52	1883.02	5111158	576.165	0
F05	54	9496	10252.5	1334.18	1164.7	16782951	1767.37	0
F05	55	11328	4832	1366.82	1712.99	9945605	877.967	0
F05	56	9541	4454.34	1416.69	337.77	4897822	513.345	1
F05	57	8618	4607.92	1432.4	1976.6	5091991	590.855	0
F05	58	8834	5501.31	1443.71	970.24	6501535	735.967	0
F05	59	11820	6214.01	1466.89	53.0613	8788606	743.537	0
F05	60	14309	6466.19	1482.4	514.997	12473208	871.704	0
F05	61	5173	6892.22	1584.07	23.0706	4570093	883.451	0
F05	62	9632	5964.43	1595	574.339	8609487	893.842	0
F05	63	12183	3937.29	1613.08	302.858	8530350	700.185	0
F05	64	8390	5465.38	1627.28	1137.68	6048759	720.949	0
F05	65	8141	5125.79	1651.35	1586.57	6386334	784.466	3
F05	66	14336	5766.23	1669.53	167.058	10383973	724.328	0
F05	67	19123	5852.35	1687.48	642.357	10736668	561.453	2
F05	68	8750	5244.24	1680.78	1452.1	7333160	838.075	0
F05	69	9899	7542.79	1694.49	1997.58	10922069	1103.35	0
F05	70	10031	4904.85	1731.54	1308.53	6116840	609.794	1
F05	71	12604	6602.31	1799.92	253.992	10525789	835.115	3
F05	72	13848	6670.78	1811.34	444.322	10150818	733.017	0
F05	73	10218	5101.39	1805.4	630.97	2721301	266.324	0
F05	74	9739	5795.2	1841.98	1680.93	7358049	755.524	0
F05	75	8556	4133.62	1844.47	67.9507	6182554	722.599	0
F05	76	10851	8871.43	1865.64	1910.37	13212982	1217.67	0
F05	78	16520	2974.56	1943.18	363.365	2874694	174.013	1
F05	79	10463	9487.48	1924.86	1288.89	12175577	1163.68	0
F05	80	11105	4950.21	1942.99	600.767	8419880	758.206	0
F05	81	7750	7764.45	2014.97	492.332	7770441	1002.64	0
F05	82	6088	7524.84	2020.3	1651.75	5599013	919.68	0
								0
								0
								0
F05	2	5248	4454.15	32.5492	671.779	3635283	692.699	0
F05	3	9013	7661.68	46.1053	1202.11	9157332	1016.01	1
F05	4	6151	6355.96	30.4411	1630.03	4991921	811.563	0
F05	5	7134	4676.41	55.1384	578.753	5533853	775.701	0
F05	6	11178	5938.4	60.6287	1450	8439561	755.015	1
F05	7	11392	5923.88	69.2538	1893.92	9644033	846.562	0
F05	8	8550	3969.21	58.8311	970.815	5601879	655.191	0
F05	9	9297	3917.81	139.455	624.999	5716314	614.856	0
F05	10	9818	3511.67	198.909	509.096	5005740	509.853	0
F05	11	9036	4190.67	210.959	1246.76	5089951	563.297	0
F05	12	13218	5387.85	234.85	1363.96	9166932	693.519	1
F05	13	12068	5808.99	251.954	1503.7	9556279	791.869	1
F05	14	8203	4109.7	251.562	1851.84	4934634	601.565	0
F05	15	9471	3861.98	283.13	659.563	6738052	711.44	0
F05	16	8769	6652.05	313.21	1131.53	6308856	719.45	0
F05	17	8198	4238.57	342.975	1610.79	4997776	609.634	0
F05	18	9366	3672.1	371.276	402.74	6247278	667.017	1
F05	19	11521	3579.45	392.089	555.212	7133976	619.215	1
F05	20	9213	4329.09	415.864	676.293	7302704	792.652	0
F05	21	8374	10626.2	414.782	1337.14	15886316	1897.1	0
F05	22	9486	3764.88	438.639	326.626	7203852	759.419	2
F05	23	7499	5148.49	450.832	921.506	6554530	874.054	0
F05	24	9763	4143.84	495.096	1172.47	7070438	724.208	0
F05	26	12413	5693.96	535.97	1700.07	10539116	849.039	0
F05	27	9413	4573.96	522.287	638.572	8252647	876.729	0
F05	28	11665	5262.68	524.7	1930.3	7546896	646.969	0
F05	29	7975	4750.68	531.568	504.825	6468603	811.11	0
F05	30	8866	4321.88	532.138	1419.28	5797574	653.911	0
F05	31	8753	4400.72	609.903	274.422	9085449	1037.98	2
F05	32	9428	3581.6	623.453	124.786	5694273	603.975	0
F05	33	11485	7818.29	642.403	816.376	13705040	1193.3	0
F05	34	7899	5243.46	671.104	434.927	7440540	941.96	1
F05	35	8681	4695.64	716.327	1251.29	6864809	790.786	0
F05	36	10830	6139.64	755.85	126.33	10134782	935.806	1
F05	37	7771	5096.23	768.463	263.778	7104424	914.223	0
F05	38	13409	5234.99	892.81	1105.43	12608180	940.277	2
F05	39	10546	6207.23	910.543	1693.9	7639020	724.352	0
F05	40	9138	4797.32	949.706	405.444	8095321	885.896	0
F05	41	8720	4301.17	988.338	1500.76	5774092	662.167	0
F05	42	12509	5647.62	1031.97	1911.23	9245937	739.143	0
F05	43	21183	3934.04	1075.35	800.791	17437650	823.191	0
F05	44	10581	6568.11	1044.87	160.398	10272501	970.844	0
F05	45	11517	8482.17	1159.53	489.99	14254555	1237.7	2
F05	46	12403	6209.6	1182.96	1603.36	10421878	840.271	0
F05	47	7433	4332.8	1214.01	43.1222	5851665	787.255	0
F05	48	11267	6362.53	1266.48	1947.01	10542353	935.684	0
F05	49	14318	6601.8	1296.09	1138.67	13279255	927.452	0
F05	50	14469	5971.67	1316.51	1303.88	11214428	775.066	1
F05	51	12877	3886.97	1357.82	1472.18	6388250	496.098	0
F05	52	7668	4925.83	1403.45	180.586	6719681	876.328	0
F05	53	7986	3553.62	1510.66	2020.92	5149308	644.792	0
F05	54	10782	5087.29	1520.35	455.458	15314826	1420.41	1
F05	55	10946	4227.83	1535.67	1380.17	7173177	655.324	2
F05	56	9976	4040.65	1533.87	1923.91	7054877	707.185	0
F05	57	10421	4553.12	1588.91	51.6081	7268107	697.448	0
F05	58	6756	7647.18	1592.56	1046.32	7742017	1145.95	1
F05	59	12571	5304.68	1670.66	1212.58	6889369	548.037	0
F05	60	7392	6952.6	1667.55	842.503	8436436	1141.29	0
F05	62	12451	6722.05	1777.87	1749.93	9752271	783.252	2
F05	63	8646	6156.74	1801.12	2010.09	5989607	692.76	0
F05	64	10604	6740.56	1826.96	1282.72	9495232	895.439	3
F05	66	15170	6108.11	1877.94	1396.66	9919606	653.896	0
F05	67	10232	5521.06	1844.25	975.349	9329114	911.759	0
F05	68	12088	4765.83	1870	229.456	8951009	740.487	0
F05	69	10767	6598.09	1909.17	1732.32	9557758	887.69	2
F05	70	16504	6115.68	1941.85	1845.86	15471224	937.423	0
F05	71	12867	5425.51	1953.03	394.645	10323457	802.32	1
F05	72	12580	7369.23	1976.46	1147.86	11159618	887.092	0
F05	73	6012	8032.14	1978.69	2018.22	5195854	864.247	0
F05	74	9468	5811.33	1961.78	1265	7697714	813.024	0
F05	75	11712	7597.61	1980.34	629.709	13223095	1129.02	1
F05	76	10481	8160.02	2000.79	1490.16	11859521	1131.53	0
F05	77	7676	7111.52	2002.69	1941.06	5850361	762.163	0
F05	2	6624	3915.64	27.7109	738.434	1088597	164.341	1
F05	4	7165	3418.95	39.9064	1021.48	4547955	634.746	3
F05	6	7323	5508.59	36.2978	1756.45	5234931	714.862	1
F05	8	8875	6403.59	46.2224	293.755	8132571	916.346	0
F05	9	12082	5587.97	93.6906	1634.72	7206059	596.429	2
F05	10	7195	11290.6	101.933	1488.09	11843358	1646.05	0
F05	11	10352	3523.8	144.818	1204.28	7011477	677.307	2
F05	12	6281	4599.68	126.995	174.015	4551373	724.626	0
F05	13	5582	3178.89	183.933	2021.91	2851631	510.862	1
F05	14	15472	3357.06	212.548	1354.33	8888514	574.49	2
F05	15	8849	3944.46	197.509	974.687	1351438	152.722	0
F05	16	6673	4795.54	198.511	536.524	5280306	791.294	0
F05	17	8638	3960.41	244.13	1895.63	4975119	575.957	0
F05	18	12892	5552.01	279.599	1590.15	11755470	911.842	0
F05	19	8279	4036.52	331.312	1778.09	5020467	606.41	0
F05	20	15155	5352.88	356.231	1233.89	14940684	985.858	0
F05	21	12334	2993.84	394.396	1970.35	7111964	576.615	1
F05	22	11470	6199.75	441.216	525.126	9742702	849.407	0
F05	23	12083	5838.23	487.825	1463.77	8182762	677.213	0
F05	24	11882	3167.13	534.705	1880.37	6473687	544.831	0
F05	25	13820	2078.77	621.346	1107.62	2594361	187.725	0
F05	26	13216	5188.61	558.044	1680.06	8766538	663.328	0
F05	27	11581	4898	576.95	1212.47	8027918	693.197	1
F05	28	14487	5857.04	621.224	1381.02	11648514	804.067	0
F05	29	10620	5509.13	670.289	1782.46	7167065	674.865	1
F05	30	9319	7543.15	688.772	710.948	10136547	1087.73	0
F05	31	10055	7985.28	746.934	493.873	11694728	1163.08	1
F05	32	11511	5439.27	785.444	1561.64	7951446	690.769	1
F05	33	10443	5269.81	781.682	1830.77	6921667	662.804	1
F05	34	13861	6300.1	804.614	1239.92	12276533	885.689	2
F05	35	10810	4275.8	817.675	1044.5	7847794	725.975	2
F05	36	10036	4369.63	828.635	1720.39	6549918	652.642	0
F05	37	8071	4630.03	852.815	1390.82	5032413	623.518	0
F05	38	9850	3539.75	864.06	1985.58	5503237	558.704	0
F05	39	10303	5095.46	942.758	1787.21	6669341	647.32	1
F05	40	8545	3889	952.022	111.62	6461343	756.155	0
F05	41	10823	4857.99	968.498	1216.56	7470527	690.245	0
F05	42	11796	8305.99	965.895	704.606	14082816	1193.86	0
F05	43	13011	4960.43	983.983	1633.09	8930773	686.402	1
F05	44	8601	4272.08	991.414	1427.7	5613416	652.647	0
F05	45	10160	4596.69	1019.02	349.805	10242582	1008.13	0
F05	46	9564	4979.17	1023.58	1014.07	7857726	821.594	0
F05	47	8730	5756.61	1058.54	543.787	8317139	952.708	0
F05	48	9584	4199.74	1125.96	1817.71	6447885	672.776	0
F05	49	11818	5255.23	1149.41	1667.86	8578999	725.926	1
F05	50	12744	6200.34	1177.56	261.21	10175886	798.484	0
F05	51	7004	7117.54	1159.12	523.838	7857630	1121.88	1
F05	52	9431	7121.37	1171.13	137.387	7146348	757.751	0
F05	53	10724	5414.47	1220.29	1416.79	6841160	637.93	2
F05	55	13452	8191.17	1260.65	418.011	20426044	1518.44	0
F05	56	9341	4693.87	1272.49	1677.36	6891888	737.811	0
F05	57	9155	13890.6	1265.69	694.039	29671330	3241	0
F05	58	12985	7096.66	1294.29	1077.28	13028834	1003.38	1
F05	59	15634	5152.96	1314.95	180.463	10203638	652.657	0
F05	60	10064	4092.73	1370.33	1842.25	7604581	755.622	0
F05	61	15301	5611.32	1379.26	1537.74	12670194	828.063	0
F05	62	10422	5658.92	1389.29	1671.69	7888190	756.879	0
F05	63	10896	5625.52	1413.37	519.583	8766817	804.59	1
F05	64	11536	6928.28	1466.55	347.039	11298580	979.419	0
F05	65	5619	2636.53	1501.46	18.1458	3292458	585.951	0
F05	66	12916	6452.14	1498.77	1730.39	12028427	931.281	0
F05	68	14404	6120.06	1505.06	1441.04	11950410	829.659	0
F05	69	8047	4038.26	1585.84	2005.37	4751967	590.527	0
F05	70	9416	5319.33	1581.39	1281.33	7418244	787.834	1
F05	71	10360	4117.3	1583.13	1594.7	1923405	185.657	0
F05	72	10703	6079.68	1623.48	1015.8	9414229	879.588	3
F05	73	11316	4585.96	1655.24	1385.66	8081310	714.149	0
F05	74	15268	6995.98	1744.12	825.068	18462600	1209.24	0
F05	75	11225	3800.22	1748.71	1776.15	7164408	638.255	0
F05	77	5724	3390.18	1787.83	20.3857	2727135	476.439	0
F05	78	12609	8050.86	1797.76	1459.4	13453446	1066.97	0
F05	79	10151	5529.35	1802.69	1256.52	7831803	771.53	1
F05	80	13005	5257.48	1831.24	167.143	11398812	876.495	1
F05	81	10495	5894.4	1881.09	768.863	9910389	944.296	0
F05	82	10020	6281.08	1882.06	355.907	8291882	827.533	2
F05	83	10371	8735.4	1896.43	1615.24	9200575	887.144	0
F05	84	8371	6408.63	1896.5	1120.51	7670646	916.336	1
F05	85	7532	5881.76	1956.42	680.708	6060538	804.639	0
F05	87	10137	5248.29	1980.06	1271.14	9021679	889.975	2
G05	1	6026	4483.19	32.8722	356.268	5654059	938.277	0
G05	2	6734	3322.44	35.1634	520.802	3392385	503.77	0
G05	4	5220	6150.03	23.6966	987.774	4995336	956.961	0
G05	8	6973	5961.51	29.4694	1708.94	5220223	748.634	0
G05	9	8747	5182.35	43.7673	1933.89	5800498	663.141	1
G05	10	7559	4730.37	62.9381	879.918	5436427	719.199	0
G05	11	7628	4302.27	70.2863	249.292	6610382	866.594	0
G05	12	8486	4947.3	116.064	1789.13	5252483	618.959	0
G05	13	10407	5697.05	145.692	366.484	7454382	716.285	0
G05	14	9721	3668.69	156.874	1303.1	5789741	595.591	0
G05	15	12033	5819.06	165.918	1604.5	8943848	743.277	1
G05	17	10662	6495.29	165.069	1088.93	9977045	935.757	0
G05	18	8791	3920.26	186.025	760.478	5832848	663.502	0
G05	19	12504	5850.82	216.784	1742.29	8283185	662.443	0
G05	20	10166	6920.71	215.184	988.251	8774383	863.111	0
G05	22	11934	6465.9	255.532	1855.11	10506450	880.38	0
G05	23	10234	3560.14	268.353	1271.54	5594062	546.615	1
G05	24	11785	3080.23	314.649	394.001	8762135	743.499	0
G05	26	9499	10723.5	315.853	816.587	15344478	1615.38	0
G05	27	7419	5262.56	321.081	921.539	6059088	816.699	0
G05	28	9822	5538.07	335.601	1111.3	8702919	886.064	0
G05	29	10363	3547.7	342.625	1490.19	6587479	635.673	1
G05	30	10410	7056.89	347.557	1976.6	10498312	1008.48	1
G05	31	7751	4679.17	345.141	1753.28	4640063	598.641	0
G05	33	10748	4956.78	430.171	623.977	8141814	757.519	0
G05	34	9216	4735.91	420.467	937.684	7603996	825.086	0
G05	35	10561	3507.65	442.811	1450.59	6355062	601.748	0
G05	36	7766	4264.35	455.29	1824.69	4550909	586.004	0
G05	37	10051	7383.83	471.997	731.057	9673084	962.4	1
G05	38	13699	5173.49	501.442	1642.9	10226077	746.483	0
G05	39	9952	5086.83	517.074	501.931	8376731	841.713	1
G05	40	9461	7801.28	510.313	857.431	8583765	907.279	1
G05	41	9879	3923.98	526.518	244.471	6537524	661.76	1
G05	42	10199	5346.24	545.357	1134.82	8346794	818.393	1
G05	44	7621	10207.1	588.105	1994.69	8584214	1126.39	0
G05	45	12124	5834.15	616.885	1774.31	9220388	760.507	0
G05	46	12037	4543.66	647.09	748.279	9547012	793.139	1
G05	47	10553	3726.35	674.736	1592.7	1774224	168.125	0
G05	48	13730	3947.74	698.325	1044.09	8340199	607.443	1
G05	49	10043	7705.75	689.374	417.526	12923970	1286.86	1
G05	50	11598	10398.8	702.142	1312.51	20476794	1765.55	0
G05	51	12971	7121.18	764.104	831.991	13619876	1050.03	1
G05	52	10360	6607.32	770.427	1918.34	9323916	899.992	0
G05	53	9412	4289.39	803.082	1691.01	1851720	196.74	1
G05	54	10527	4093.48	824.392	1581.46	5595003	531.491	1
G05	55	11291	8234.02	824.911	981.462	10606819	939.405	0
G05	56	9429	3762.52	856.465	267.581	6889161	730.635	2
G05	57	11820	7404.76	877.793	681.964	13730129	1161.6	1
G05	58	11016	3998.69	899.07	1484.64	6635833	602.381	0
G05	59	13574	6846.17	942.488	1184.02	16138230	1188.91	0
G05	61	11866	7364.25	946.57	1294.76	13178084	1110.58	0
G05	62	9260	4080.29	1008.87	1698.39	2700589	291.64	1
G05	63	11388	6880.87	1015.75	1581.23	11075480	972.557	0
G05	64	10057	12435	1027.98	458.403	20252540	2013.78	0
G05	65	13429	8261.92	1123.96	878.403	17053796	1269.92	3
G05	66	9525	8751.46	1223.12	190.097	15357284	1612.31	0
G05	67	12795	6791.1	1268	1226.97	14306720	1118.15	2
G05	68	10727	8897	1249.51	1055.73	11214211	1045.42	0
G05	69	7819	5663.97	1246.37	454.563	6184724	790.987	1
G05	70	7100	6616.19	1288.87	630.092	6274486	883.73	2
G05	71	10461	7248.19	1337.85	1683.85	10282166	982.905	1
G05	72	10408	4060.73	1344.86	1468.75	7581248	728.406	1
G05	73	10932	6463.99	1375.91	831.419	11816776	1080.93	1
G05	74	9204	4329.23	1379.27	1872.85	6389670	694.228	0
G05	75	9699	3839.62	1412.66	1991.33	5665259	584.108	0
G05	76	10858	8624.64	1477.55	1009.82	11880232	1094.15	0
G05	77	9171	7519.19	1495.45	551.495	10281069	1121.04	0
G05	78	8020	12681.7	1565.05	1472.11	16708296	2083.33	0
G05	79	10664	6353.75	1593.22	875.966	9173185	860.201	4
G05	80	9659	4665.64	1582.35	1912.12	8355117	865.008	1
G05	81	10775	4376.16	1670.08	1983.44	7990406	741.569	0
G05	82	10046	5929.22	1758.7	1752.8	8741239	870.121	0
G05	83	9429	10815.4	1786.83	1100.15	11796214	1251.06	0
G05	84	10834	5464.44	1786.36	1873.66	7904901	729.638	0
G05	85	10946	8283	1820.78	483.569	13366465	1221.13	0
G05	87	10210	5092.44	1852.7	656.577	8513277	833.818	4
G05	88	10353	7761.27	1898.95	1736.34	10023802	968.203	1
G05	89	12928	6362.68	1924.71	1917.83	10599601	819.895	0
G05	90	8398	8202.95	1997.19	291.84	9168247	1091.72	0
G05	91	5016	6140.23	2017.39	1381.11	4724416	941.869	0
G05	92	5439	4759.17	2025.14	689.72	3934986	723.476	1
G05	2	8170	5351.63	35.7824	410.238	7621618	932.879	0
G05	5	8150	4754.4	38.5022	909.175	4782039	586.753	2
G05	8	8201	3537.96	44.4451	1673.25	4150525	506.1	0
G05	9	13694	4457.01	90.8143	297.004	9872901	720.965	2
G05	10	13219	4596.14	96.014	714.628	8435557	638.139	0
G05	11	9449	3570.2	118.102	1360.68	4873321	515.75	0
G05	12	6759	2794.81	159.098	37.7569	3708102	548.617	2
G05	13	12287	5654.71	177.887	1629.93	10370305	844.006	0
G05	14	10585	3449.82	182.849	1833.84	1720437	162.535	1
G05	15	8789	9213.11	194.588	1045.61	10390924	1182.26	0
G05	16	11240	3676.73	219.035	1192.35	8160800	726.05	1
G05	17	9601	3957.96	233.849	1357.51	5544327	577.474	0
G05	18	10943	5869.47	238.913	542.754	8845989	808.37	1
G05	19	7924	8686.27	251.546	198.52	9551529	1205.39	0
G05	20	12281	6097.72	297.049	1533.33	11479704	934.753	0
G05	21	9333	3213.09	307.648	48.6741	5734752	614.46	2
G05	22	6041	4159.59	295.372	2012.55	3669628	607.454	0
G05	23	12615	5885.06	304.68	891.581	10721962	849.938	0
G05	24	12977	5857.52	358.682	1069.62	11743871	904.976	0
G05	25	11334	7184.76	356.421	1338.96	11142182	983.076	1
G05	26	9636	3585.96	393.21	1712.69	5396058	559.989	1
G05	27	7192	5285.28	430.51	828.066	5126966	712.871	1
G05	28	7101	5744.56	434.089	964.903	5364778	755.496	0
G05	29	7891	4309.71	493.042	1640.68	5706029	723.106	1
G05	30	7916	3929.11	491.205	57.6592	5119454	646.722	0
G05	31	9087	3526.56	502.207	1836.5	5080871	559.136	0
G05	32	6593	4439.47	518.874	242.564	3964358	601.298	0
G05	33	8330	5357.13	552.305	853.366	7255283	870.982	0
G05	34	6679	5917.12	574.176	964.935	4860243	727.69	0
G05	35	6756	5330.24	581.894	1408.95	4955028	733.426	0
G05	37	12763	7094.58	613.947	1178.72	15210859	1191.79	0
G05	38	7172	5013.71	646.222	1517.16	4992987	696.178	0
G05	39	8189	4218.71	645.013	1800.7	5421071	661.994	0
G05	40	10172	4964.71	682.897	1043.63	8267590	812.779	0
G05	41	10518	6650.28	708.512	1676.14	9004920	856.144	0
G05	42	11935	7599.59	738.927	1305.65	12131110	1016.43	0
G05	43	12775	7281.9	760.467	1119.95	13064961	1022.7	0
G05	45	7867	6112.56	849.461	1021.83	7800246	991.515	0
G05	46	10434	6451.11	921.078	1077.43	9601877	920.249	2
G05	47	10921	7717.89	921.92	1223.69	10357151	948.37	0
G05	48	12246	4785.52	1054.55	964.98	9797073	800.022	1
G05	49	8603	5151.31	1072.14	742.195	6981879	811.563	0
G05	50	7559	4557.08	1080.87	1986.76	4581777	606.135	0
G05	51	10888	7223.62	1138.35	1486.75	11978608	1100.17	2
G05	52	9465	4732.8	1146.12	1258.21	7663982	809.718	0
G05	53	14214	6290.99	1187.35	1103.18	11314513	796.012	1
G05	54	8986	4751.27	1193.69	363.025	7330685	815.79	0
G05	55	10025	7239.03	1211.9	1913.99	9197560	917.462	0
G05	57	8496	6397.58	1313.65	901.97	8649386	1018.05	0
G05	58	9352	4898.81	1355.58	1173.97	5697900	609.271	0
G05	59	8598	4456.77	1355.05	1953.08	5818822	676.765	0
G05	60	29390	6968.19	1456.32	419.321	33373037	1135.52	0
G05	61	9173	5753.88	1416.67	538.436	9420044	1026.93	0
G05	62	9054	4650.56	1426.32	1273.96	6087983	672.408	0
G05	63	13444	5719.6	1442.18	174.578	14920191	1109.8	0
G05	65	8061	6950.09	1426.69	817.071	8758542	1086.53	0
G05	66	15065	4444.45	1473.81	1047.26	10526985	698.771	1
G05	67	11395	5400.79	1547.38	1168.94	8026146	704.357	1
G05	68	14368	6025.05	1542.26	244.318	14567739	1013.9	3
G05	69	7159	5258.61	1540.54	1807.58	5384018	752.063	0
G05	70	12723	5236.42	1582.57	718.623	10203536	801.976	1
G05	71	12175	5698.53	1600.99	527.217	10085034	828.34	0
G05	72	10743	4987.14	1656.03	927.09	8091926	753.228	1
G05	73	10249	9183.73	1673.15	1595.39	12677754	1236.97	1
G05	74	11399	5587.36	1700.87	251.224	10058352	882.389	0
G05	75	10635	5616.66	1722.64	1080.86	8988621	845.192	3
G05	76	10636	4956.13	1711.12	552.741	8673616	815.496	0
G05	77	10606	6972.92	1725.61	400.004	10610406	1000.42	2
G05	78	8369	4148.89	1746.03	65.0051	6967133	832.493	0
G05	79	7979	5721.91	1804.17	1410.11	5715525	716.321	1
G05	80	13121	6635.37	1831.85	1011.62	14204755	1082.6	1
G05	81	12088	6940.61	1826.42	1529.79	13416392	1109.89	0
G05	82	11216	5917.68	1842.99	1250.28	9955204	887.59	0
G05	83	9197	5156.53	1816.75	708.919	7037944	765.243	0
G05	84	9394	4568.63	1842.12	141.626	7996582	851.244	0
G05	85	5673	3754.28	1829.32	36.5108	4182186	737.209	0
G05	86	11424	4196.45	1855.5	435.758	8285035	725.231	2
G05	87	9567	5269.52	1874.78	901.365	7812167	816.574	0
G05	88	11041	4631.14	1904.53	305.461	9209887	834.153	0
G05	89	11534	8379.68	1923.1	1436.98	12536439	1086.91	0
G05	90	9438	5362.02	1955.09	605.595	7342141	777.934	0
G05	91	9310	4516.12	1979.55	1747	6056470	650.534	0
G05	93	9484	8325.9	2007.52	1491.77	10166178	1071.93	0
G05	94	7374	6034.83	2014.7	730.786	6110459	828.649	0
G05	95	6818	3974.46	2016.2	78.1113	4805686	704.853	1
								0
G05	1	6314	4574.86	36.3929	1016.81	4507043	713.817	1
G05	3	11305	2928.49	76.5114	562.596	7477989	661.476	1
G05	4	12398	4115.67	148.612	87.8121	7394465	596.424	1
G05	5	10490	3111.38	149.564	1998.35	5362336	511.186	0
G05	6	7325	4387.53	240.068	662.626	5654101	771.891	1
G05	7	9731	3427.04	352.288	252.859	7820336	803.652	0
G05	8	11190	3146.49	391.23	1972.54	6084595	543.753	0
G05	9	9706	4433.29	388.102	467.367	6457790	665.34	1
G05	10	8495	3352.31	455.711	70.435	5015245	590.376	0
G05	11	10863	3828.94	468.475	880.318	9112143	838.824	0
G05	12	9828	6171.37	477.136	1121.01	7706459	784.133	1
G05	13	10159	6744.7	517.451	705.957	9570153	942.037	0
G05	14	10396	3618.93	576.269	327.012	8961837	862.047	0
G05	15	9331	3876.32	635.732	1605.15	6583288	705.529	1
G05	16	10490	3546.82	703.599	202.092	7956138	758.45	0
G05	17	11037	6524.59	701.618	1965.57	9933267	899.997	0
G05	19	8385	4834.31	759.825	1079.11	5553844	662.355	0
G05	20	6167	8107.58	772.024	1235.94	8968010	1454.19	0
G05	21	8541	7628.65	819.319	1441.21	7647370	895.372	1
G05	23	10833	8470.35	854.611	900.085	10983666	1013.91	0
[truncated: 2,282 more rows]

## Sheet: 53BP1_ZD_Rep1
ParentWell	CellIndx	NuclearArea	MeanNuclearIntensity	Centroid_1	Centroid_2	IntNuclearIntensity	pRBIntensity	NumPuncta
								0
WellX	2	10412	196.221	44.699	212.785	4086939	392.522	1
WellX	4	5140	175.728	37.1597	1357.24	656096	127.645	0
WellX	6	8349	210.161	55.0976	395.231	4481540	536.776	1
WellX	7	13276	202.268	146.655	263.101	5149554	387.884	2
WellX	8	14298	242.031	163.797	1184.53	7371642	515.572	6
WellX	9	12207	212.658	190.285	59.7012	6484795	531.236	2
WellX	10	11867	183.433	185.122	1440.16	1787051	150.59	0
WellX	12	11123	195.306	219.798	1875.25	1512398	135.97	0
WellX	13	21777	235.418	328.752	362.698	10227344	469.64	1
WellX	14	14516	208.992	333.904	222.741	6476490	446.162	4
WellX	15	17154	205.903	363.841	1404.25	7512770	437.96	2
WellX	16	10272	207.703	473.665	1309.15	1461462	142.276	1
WellX	17	8241	244.631	471.602	1996.33	2783462	337.758	2
WellX	18	10697	199.184	484.849	1547.43	1489056	139.203	0
WellX	19	7294	205.517	506.042	32.5729	3202219	439.021	2
WellX	20	10141	266.763	545.569	357.357	5286528	521.302	4
WellX	21	13551	206.818	588.031	1466.31	6546486	483.1	1
WellX	22	20107	236.499	639.603	201.444	8270270	411.313	0
WellX	23	15412	257.803	692.847	1299.7	7913181	513.443	4
WellX	24	8098	225.523	692.21	40.5658	1258374	155.393	1
WellX	25	8685	261.564	754.282	299.679	1375469	158.373	1
WellX	26	22057	233.01	791.541	1662.2	14679161	665.51	3
WellX	27	14424	238.574	812.915	1869.49	5501832	381.436	5
WellX	28	10700	211.618	818.382	2004.13	6006712	561.375	0
WellX	29	20293	223.234	873.506	66.018	7285142	358.998	7
WellX	30	13158	241.103	876.033	219.661	5658453	430.039	1
WellX	31	13326	190.104	897.505	1389.88	1770244	132.841	0
WellX	32	29835	279.051	1006.02	354.477	8076703	270.712	5
WellX	33	25089	221.529	1050.13	151.559	9183751	366.047	4
WellX	34	22562	229.382	1081.46	1875.62	9326555	413.374	0
WellX	35	7445	331.192	1158.94	418.523	1183257	158.933	0
WellX	36	8741	288.051	1212.09	300.464	1362762	155.905	1
WellX	37	13201	243.601	1217.34	1773.34	4953186	375.213	3
WellX	38	19577	257.698	1273.39	1620.83	14459753	738.609	2
WellX	39	22537	286.935	1316.45	497.199	7265095	322.363	2
WellX	40	15521	216.028	1376.56	204.506	12727877	820.042	2
WellX	41	16439	249.382	1415.97	1985.13	8428448	512.711	3
WellX	42	26072	336.659	1475.13	438.879	16971735	650.956	8
WellX	43	5712	193.551	1410.78	30.381	1230441	215.413	1
WellX	44	9281	261.111	1504.13	1174.55	1274739	137.349	2
WellX	45	26001	275.815	1583.88	1685.73	3552191	136.617	1
WellX	46	11805	201.93	1596.14	61.0911	1602800	135.773	3
WellX	48	14907	195.347	1654.27	184.323	2726916	182.929	0
WellX	49	21936	286.447	1743	631.256	22961209	1046.74	5
WellX	50	13081	218.372	1768.63	466.792	2048724	156.618	4
WellX	51	8448	183.659	1779.61	34.9162	3931543	465.382	1
WellX	53	11155	251.142	1885.14	856.249	1643080	147.295	3
WellX	54	13685	198.114	1896.55	352.939	1955114	142.865	1
WellX	55	9406	272.138	1909.44	744.115	1539931	163.718	4
WellX	56	14061	299.27	1939.66	573.142	8201718	583.295	3
WellX	57	8618	393.027	2001.2	785.65	4770019	553.495	0
WellX	58	7292	216.638	2018.67	1713.54	961044	131.794	0
WellX	59	5744	259.98	2021.92	922.204	900261	156.731	0
WellX	1	10468	249.688	893.516	1483.94	4699910	448.979	1
WellX	2	7399	255.937	899.266	1624.35	2895075	391.279	2
WellX	3	8486	253.335	1016.39	1577.49	3684674	434.206	2
WellX	4	12370	245.322	1056.95	1440.84	7899282	638.584	3
WellX	5	14641	327.729	1196.21	1954.76	7356513	502.46	4
WellX	1	8820	254.864	714.579	1412.49	1211187	137.323	3
WellX	2	11614	285.432	805.628	937.544	6999869	602.71	0
WellX	3	14028	322.87	1004.42	754.975	10899053	776.95	1
WellX	4	8616	267.221	1261.36	1505.62	1132437	131.434	1
WellX	5	19829	286.858	1687.21	1020.55	9702230	489.295	3
								0
WellX	2	10595	220.877	198.219	1591.64	4659727	439.804	4
WellX	3	9765	235.388	539.968	1141.39	4433475	454.017	3
WellX	4	18308	268.735	663.302	988.504	2685727	146.697	4
WellX	5	8087	285.817	737.07	879.498	1209329	149.54	2
WellX	6	19734	268.972	767.729	1062.37	3115673	157.884	3
WellX	7	15630	329.613	883.201	882.053	10645289	681.081	2
WellX	8	21810	279.234	1574.15	1037.39	14486342	664.206	0
WellX	1	8820	300.309	41.6484	637.364	4524559	512.989	1
WellX	2	12960	354.193	768.945	569.016	8757411	675.726	4
WellX	3	13451	373.714	953.576	633.746	12323988	916.214	4
WellX	4	25254	335.368	1064.04	1306.93	7422655	293.92	1
WellX	5	28188	302.561	1221.76	1159.05	9097946	322.76	1
WellX	6	10661	322.2	1155.85	1482.14	5337039	500.613	2
WellX	7	13992	294.155	1268.33	1361.84	7732714	552.653	2
WellX	8	8775	245.748	1315.4	1544.74	2927078	333.57	3
WellX	9	18519	301.552	1385.07	1273.27	10090592	544.878	3
WellX	10	8552	262.605	1441.11	1423.03	1270763	148.592	1
WellX	2	24409	255.701	344.31	1154.86	10701278	438.415	6
WellX	3	6635	219.657	328.752	29.0553	2344013	353.28	2
WellX	4	11704	239.843	398.55	1005.37	5074946	433.608	5
WellX	5	11245	230.364	406.67	1306.72	4412532	392.399	1
WellX	6	8502	272.354	401.536	824.575	4216207	495.908	2
WellX	7	9902	226.152	512.175	1394.32	1456079	147.049	1
WellX	8	10405	229.816	526.285	1204.22	1539993	148.005	0
WellX	10	25741	256.269	835.522	1681.22	12948092	503.014	1
WellX	11	18474	246.958	900.317	1445.08	11345939	614.157	3
WellX	12	11812	326.847	1029.12	1597.53	4781621	404.81	5
WellX	13	12385	258.486	1050.26	1481.91	6178681	498.884	2
WellX	14	11625	218.551	1050.49	1816.14	1614298	138.864	2
WellX	15	13398	311.029	1118.16	1692.07	5236632	390.852	3
WellX	16	12218	252.835	1179.8	1413.39	6981854	571.44	2
WellX	17	9417	270.391	1169.07	1254.77	4296985	456.301	1
WellX	18	13740	279.266	1220.35	41.7124	4640969	337.771	1
WellX	19	23966	237.66	1254.74	1599.59	6621204	276.275	2
WellX	20	11346	233.107	1234.45	1840.17	4281550	377.362	3
WellX	21	13251	214.033	1301.98	1407.98	1990718	150.232	0
WellX	22	10437	303.619	1298.07	936.468	5887657	564.114	3
WellX	23	13773	278.715	1300.67	1134.39	7951829	577.349	5
WellX	24	11315	229.687	1316.34	1774.64	1668167	147.43	3
WellX	25	10549	232.989	1404.25	1969.15	1336675	126.711	0
WellX	26	13341	248.448	1430.77	829.397	1802160	135.084	2
WellX	27	5186	176.233	1476.1	22.4069	2451985	472.809	0
WellX	28	12828	211.882	1489.15	1613.4	1648431	128.503	1
WellX	29	11149	229.865	1498.19	1811.51	1456356	130.627	1
WellX	30	9141	310.263	1607.39	885.249	1290343	141.16	4
WellX	31	8012	335.517	1610.13	628.2	1154202	144.059	1
WellX	32	14154	282.848	1699.84	170.071	7695141	543.673	6
WellX	33	10615	255.448	1753.14	492.867	1453300	136.91	5
WellX	34	7172	336.492	1762.43	1751.63	1122958	156.575	1
WellX	35	8988	294.97	1786.64	732.007	1216257	135.32	4
WellX	36	7056	343.553	1793.96	1834.89	1095475	155.254	1
WellX	2	7969	246.269	37.9826	373.68	5214352	654.33	2
WellX	3	8208	213.975	34.847	746.193	3903130	475.528	0
WellX	4	14767	263.917	63.299	985.652	2268220	153.601	6
WellX	5	13792	194.418	115.939	1319.35	5114905	370.86	4
WellX	6	11212	275.807	177.637	49.7894	5598845	499.362	2
WellX	7	9768	230.15	166.308	661.586	4557804	466.606	1
WellX	8	11092	199.967	233.725	1200.1	1667331	150.318	1
WellX	9	9459	230.222	327.91	581.95	1210174	127.939	0
WellX	10	11950	227.987	415.283	1243.45	6758334	565.551	1
WellX	11	14938	263.896	735.619	1861.47	5552946	371.733	4
WellX	13	6459	213.64	855.345	2015.65	1225805	189.782	1
WellX	14	19052	258.07	945.927	1831.4	6711660	352.281	1
WellX	15	9171	233.114	949.761	1577.52	3368247	367.272	1
WellX	16	8488	247.559	1043.85	1438.79	1916674	225.81	0
WellX	17	10170	251.026	1051.78	1195.71	1919211	188.713	1
WellX	18	9107	248.865	1060.11	1639.54	3076365	337.802	3
WellX	19	8305	262.896	1141.33	1553.01	2453414	295.414	2
WellX	20	11659	303.327	1433.9	657.142	6835877	586.318	1
WellX	21	11754	286.19	1442.77	883.301	6323993	538.029	3
WellX	22	12223	266.365	1816	1567.77	5708697	467.045	1
WellX	23	12859	249.956	1832.24	1918.08	6654696	517.513	4
WellX	24	12153	224.359	1835.47	1744.8	1715922	141.193	2
WellX	25	11362	280.766	1857.88	1267.78	8116448	714.35	0
WellX	26	10997	249.258	1918.72	1519.59	1795908	163.309	1
WellX	27	13717	251.167	1981.33	1628.27	5660841	412.688	4
WellX	1	18007	264.455	344.708	1531.29	2264909	125.779	0
WellX	2	11119	215.911	558.556	162.38	1551912	139.573	1
WellX	3	14040	258.825	600.086	827.4	8285166	590.112	3
WellX	4	16044	270.422	635.854	487.09	8989389	560.296	4
WellX	5	11324	217.629	621.4	236.519	1378392	121.723	2
WellX	6	7748	211.625	704.842	38.0851	1423726	183.754	0
WellX	7	6212	203.514	833.709	27.5116	1246025	200.584	1
WellX	8	12262	317.18	1311	648.013	1709765	139.436	2
WellX	9	11472	221.172	1732.08	298.183	1616350	140.895	3
WellX	1	17523	251.663	254.954	758.084	2220471	126.718	4
WellX	2	9353	251.698	353.721	724.935	1218716	130.302	0
WellX	3	8037	268.872	361.425	848.238	1129402	140.525	0
WellX	4	11994	295.752	543.13	1993.35	6808818	567.685	1
WellX	5	6960	255.863	854.138	2007.74	915464	131.532	0
WellX	6	10855	342.273	1158.36	847.181	11202211	1031.99	2
WellX	7	14219	386.052	1206.98	618.838	10083258	709.14	5
WellX	8	9349	428.161	1292.09	797.213	6177230	660.737	12
WellX	9	9969	380.606	1352.04	697.962	5738752	575.66	6
WellX	10	14001	389.042	1368.37	917.845	9611512	686.488	9
WellX	11	9063	272.165	1873.56	1195.55	1327326	146.455	0
WellX	12	8465	237.486	2008.41	1154.63	2351647	277.808	2
WellX	1	10143	371.409	345.083	367.112	1585844	156.349	3
WellX	2	13751	325.027	627.761	763.588	8077474	587.41	8
WellX	3	10690	434.162	827.122	655.927	2463539	230.453	4
WellX	5	10056	218.868	884.573	1423.04	1306090	129.882	1
WellX	6	13918	295.666	1135.2	1411.08	8584479	616.79	0
WellX	7	23880	289.848	1374.67	1283.61	10671008	446.86	0
WellX	8	12567	236.772	1544.22	1103.31	1922212	152.957	1
WellX	9	10670	261.933	1534.9	600.546	1581574	148.226	2
WellX	10	9697	229.523	1528.49	136.427	1281679	132.173	0
WellX	11	12177	248.853	1643.52	816.174	3269837	268.526	1
WellX	12	11403	254.94	1665.64	1168.33	7093137	622.041	2
WellX	13	18176	264.577	1743.93	1620.15	2712074	149.212	0
WellX	14	9074	295.361	1732.51	1021.51	4969311	547.643	4
WellX	15	35308	274.087	1845.74	1761.14	4898326	138.731	0
WellX	16	8552	321.534	1909.84	1028.98	5215205	609.823	1
WellX	2	6551	179.032	27.0504	363.752	830674	126.801	1
WellX	4	7320	188.697	30.9309	1891.69	2795861	381.948	1
WellX	5	10861	178.862	61.0033	159.612	1505208	138.588	1
WellX	6	10498	283.953	94.6605	841.976	6919826	659.157	2
WellX	7	8873	182.252	154.706	57.5123	1174049	132.317	0
WellX	8	13317	215.127	359.273	1940.53	4925558	369.87	2
WellX	9	7929	225.857	470.128	44.777	2563711	323.333	1
WellX	10	15927	251.96	537.217	170.868	2543299	159.685	1
WellX	11	9622	243.058	637.859	295.011	3041338	316.082	2
WellX	12	9037	264.349	663.471	481.79	1301210	143.987	5
WellX	13	13675	280.223	798.92	591.416	9540025	697.625	5
WellX	15	12214	235.354	826.452	423.684	1703243	139.45	3
WellX	16	12854	209.267	843.476	218.775	1854847	144.301	0
WellX	17	10231	211.842	937.354	1756.62	1472559	143.931	1
WellX	18	11840	239.161	956.321	484.972	1653261	139.634	3
WellX	19	16031	189.831	1012.17	155.491	5466655	341.005	4
WellX	20	11247	242.843	1000.73	311.646	1769200	157.304	1
WellX	21	13548	199.306	1109.4	1779.44	5933018	437.926	2
WellX	22	9186	225.324	1112.47	1619.36	1439758	156.734	0
WellX	23	16428	201.565	1217.8	71.151	7222282	439.632	4
WellX	24	13675	290.796	1250.53	1437.19	8805921	643.943	0
WellX	25	13321	228.484	1242.68	216.282	2109680	158.372	1
WellX	26	11023	222.889	1247.92	1876.08	1474484	133.764	3
WellX	27	12248	247.19	1283.07	1767.48	4679603	382.071	4
WellX	28	16937	264.878	1349.75	1638.62	10268863	606.298	9
WellX	29	12766	220.173	1371.87	1503.43	2435829	190.806	3
WellX	30	8316	266.802	1368.76	114.656	4361416	524.461	0
WellX	31	11159	228.219	1402.68	1853.34	1623374	145.477	0
WellX	32	9497	321.331	1388.54	853.093	8429287	887.574	2
WellX	33	17446	330.411	1481.41	268.622	9520055	545.687	3
WellX	34	21512	250.685	1510.26	1725.3	6781107	315.224	3
WellX	35	6228	324.489	1502.85	1470.57	1200928	192.827	0
WellX	36	13626	338.834	1532.14	496.112	10286641	754.927	4
WellX	37	12831	253.842	1568.28	632.996	8250870	643.042	2
WellX	38	10364	291.497	1558.57	820.285	6878151	663.658	0
WellX	39	9829	242.634	1583.61	178.142	4975348	506.191	2
WellX	40	6123	330.896	1581.73	1542.34	1234425	201.605	1
WellX	41	6184	255.28	1595.11	29.0205	3192014	516.173	1
WellX	42	10348	291.929	1606.1	943.357	7378345	713.021	1
WellX	43	10019	248.347	1607.06	1698.89	3598416	359.159	0
WellX	44	9989	257.059	1632.89	409.448	1619079	162.086	1
WellX	45	10198	262.646	1680.79	523.63	1600862	156.978	0
WellX	46	9258	335.886	1678	821.36	6219605	671.809	2
WellX	47	14920	265.13	1724.52	280.435	7805665	523.168	2
WellX	48	9904	239.604	1729.23	1785.99	1281876	129.43	0
WellX	49	9606	330.61	1725.61	973.819	7200541	749.588	0
WellX	50	22694	301.643	1769.14	669.735	13230678	583.003	6
WellX	51	7442	236.922	1783.93	50.187	3923739	527.243	1
WellX	52	10635	296.148	1802.84	886.122	7183750	675.482	0
WellX	53	13548	271.067	1847.83	341.928	7172645	529.425	2
WellX	54	10603	248.684	1826.2	475.358	1704757	160.781	2
WellX	55	15454	203.767	1869.95	179.952	7145522	462.374	2
WellX	56	13260	342.387	1890.36	982.169	9189359	693.013	1
WellX	57	10083	262.857	1879.66	673.346	3683591	365.327	2
WellX	58	10103	236.138	1907.56	1773.01	1559330	154.343	2
WellX	59	13602	337.026	1913.59	796.731	10797755	793.836	2
WellX	60	10747	238.178	1916.01	549.694	1602793	149.139	1
WellX	61	6398	264.164	2020.41	285.285	2199851	343.834	0
WellX	1	9641	227.907	182.926	809.096	1279256	132.689	1
WellX	2	11438	377.273	411.083	733.21	6381315	557.905	1
WellX	3	8538	365.847	466.03	632.054	4346263	509.049	3
WellX	4	9574	223.945	457.739	1447.93	1233966	128.887	3
WellX	5	11109	229.726	1254.23	184.956	1534698	138.149	0
WellX	6	16211	337.404	1361.23	1066.95	12785743	788.708	9
WellX	7	15617	337.06	1413.82	1222.9	10176907	651.656	4
WellX	8	10967	271.162	1491.07	1036.14	1828119	166.693	3
WellX	9	26149	285.671	1533.74	1280.88	3938109	150.603	5
WellX	1	10611	287.612	400.377	1713.81	5345873	503.805	1
WellX	2	17100	249.454	634.664	1864.39	2276490	133.128	2
WellX	3	8329	250.183	601.805	95.5519	5632593	676.263	2
WellX	4	9060	230.697	884.071	1958.98	1254317	138.446	3
WellX	5	8790	284.349	1134.56	1698.28	1333912	151.753	0
WellX	6	6835	362.213	1816.69	762.336	1392253	203.695	0
WellX	7	11278	324.924	1889.27	841.868	7954294	705.293	0
WellX	9	5667	262.101	1917.97	2016.9	3175059	560.272	0
WellX	10	10106	270.499	1929.73	715.963	7611586	753.175	3
WellX	11	8787	272.869	2003.52	1933.37	4829053	549.568	0
WellX	1	10321	259.234	56.3292	579.127	5140168	498.03	0
WellX	2	24675	312.618	312.746	1170.04	13387135	542.538	6
WellX	3	14242	406.156	352.179	881.279	2852825	200.311	5
WellX	4	34636	276.947	500.067	1170.28	5750464	166.026	2
WellX	5	8550	291.849	582.025	936.907	4102913	479.873	4
WellX	6	9814	283.88	618.939	1046.82	2116787	215.691	2
WellX	7	8255	308.299	663.393	1222.73	4103346	497.074	1
WellX	8	9032	311.304	752.686	1182.66	5482618	607.021	1
WellX	9	8120	254.107	1120.41	1768.59	1086976	133.864	3
WellX	10	14881	331.731	1326.85	297.38	9994070	671.599	4
WellX	11	12872	325.109	1424.62	117.763	7794838	605.565	3
WellX	12	13181	378.647	1449.88	368.764	9460602	717.745	8
WellX	13	15497	300.815	1520.8	190.411	8208301	529.67	7
WellX	14	6795	338.154	1488.75	1291.1	936341	137.799	0
WellX	15	14678	319.565	1717.41	374.915	8070887	549.863	2
WellX	16	12529	211.384	1745.83	219.852	1769735	141.251	0
WellX	17	14374	339.55	1789.8	495.941	7940908	552.449	8
WellX	18	9531	211.542	1782.83	49.0122	4888985	512.956	1
WellX	19	10528	266.835	1853	1724.04	5598447	531.767	2
WellX	20	13203	310.464	1982.94	490.506	6972055	528.066	5
WellX	21	7237	270.462	2011.76	1442.73	987938	136.512	1
WellX	1	11627	235.031	50.3709	1584.07	4103723	352.948	1
WellX	2	7306	216.173	36.4428	1770.75	930965	127.425	3
WellX	3	10874	218.474	152.335	1795.24	1365484	125.573	1
WellX	4	11370	206.114	184.243	1515.74	1506391	132.488	3
WellX	5	12644	209.67	198.857	1668.44	1843911	145.833	1
WellX	6	8933	258.971	282.201	1896.74	1178370	131.912	1
WellX	7	13100	267.467	378.983	2002.28	4753379	362.853	2
WellX	8	9081	227.673	369.82	1735.69	1398406	153.993	0
WellX	9	8941	287.889	556.606	232.069	3884258	434.432	3
WellX	10	31017	266.253	625.23	1762.03	12332140	397.593	6
WellX	11	10480	250.467	611.829	955.596	3468274	330.942	1
WellX	12	16661	255.381	625.086	1400.18	5234203	314.159	4
WellX	13	8819	277.893	624.577	1096.88	1158918	131.411	1
WellX	14	13834	277.384	710.745	1574.53	4125701	298.229	9
WellX	15	9204	297.274	706.95	851.758	1239833	134.706	3
WellX	16	10781	226.006	724.512	1229.46	1384002	128.374	0
WellX	17	11284	258.763	730.788	626.192	4735234	419.641	2
WellX	18	10121	274.131	788.13	973.196	1313899	129.819	2
WellX	19	10078	284.719	805.358	1680.54	3681645	365.315	1
WellX	20	8678	318.474	815.136	825.826	1175659	135.476	2
WellX	21	8829	266.04	902.815	1630.47	3155567	357.409	0
WellX	22	10454	250.648	1024.25	1050.03	1511801	144.615	0
WellX	23	18685	232.733	1838.87	428.809	9240822	494.558	4
WellX	24	6175	318.327	2011.96	1298.53	4066106	658.479	0
WellX	1	11438	212.975	96.5657	433.386	3615797	316.121	0
WellX	2	10734	204.014	190.592	296.85	1431825	133.392	1
WellX	3	5352	188.137	358.124	18.9759	1485590	277.577	0
WellX	6	7776	273.656	886.766	1425.8	1172868	150.832	0
WellX	8	7676	276.48	952.87	1178.79	2329985	303.542	1
WellX	9	16037	289.451	1930.71	1849.52	6724059	419.284	8
WellX	2	13357	232.244	235.95	1149.28	6248828	467.832	1
WellX	3	21550	237.766	328.817	1023.75	6768448	314.081	6
WellX	4	11770	238.96	433.195	882.086	6436354	546.844	2
WellX	5	18293	357.004	1394.85	204.902	11564724	632.194	3
WellX	6	9875	388.594	1380.88	306.276	7029333	711.831	0
WellX	7	9203	386.781	1371.42	423.91	6674258	725.226	1
WellX	8	8643	389.783	1486.69	423.827	8041748	930.435	0
WellX	10	13500	328.107	1574.09	371.908	12608615	933.971	0
WellX	11	10384	359.566	1777.76	1861.17	4956844	477.354	4
WellX	12	10328	368.989	1810.63	1753.69	5601831	542.393	2
WellX	1	9578	229.774	442.019	391.466	1335305	139.414	2
WellX	2	23875	258.925	509.231	1410.64	10060910	421.399	5
WellX	3	9707	255.537	498.098	752.693	5342130	550.338	1
WellX	4	14309	235.664	535.843	1175.76	6229417	435.35	2
WellX	5	13823	267.288	609.721	1041.41	7836831	566.941	1
WellX	6	10840	221.859	633.476	1360.94	1662746	153.39	4
WellX	7	15191	256.33	719.048	1690.34	7292026	480.023	4
WellX	8	11733	224.624	783.619	1035.29	3744301	319.126	1
WellX	9	12590	244.162	847.93	1235.99	7348978	583.715	2
WellX	10	11152	246.683	1405.35	295.573	1989783	178.424	2
WellX	11	8935	254.327	1476.49	167.567	1342680	150.272	3
WellX	12	9178	263.124	1497.42	48.3067	5007173	545.563	1
WellX	13	10199	230.866	1887.59	352.341	1367995	134.13	2
								0
WellX	2	6430	274.478	96.2501	1822.41	991693	154.229	0
WellX	3	6017	288.861	180.348	1739.36	895058	148.755	0
WellX	4	11275	359.447	310.719	1695.93	1722481	152.77	0
WellX	5	18994	329.457	434.324	1657.49	8348113	439.513	1
WellX	6	58476	272.173	642.678	1020.59	9383209	160.463	2
WellX	7	9562	254.108	634.752	1217.83	5117213	535.161	2
WellX	8	19323	274.345	694.252	839.468	7167063	370.908	3
WellX	9	11301	255.639	854.338	925.228	3121065	276.176	0
WellX	10	15095	321.203	898.869	1071.78	2143223	141.982	4
WellX	11	16059	270.226	1527.67	1970.18	7540603	469.556	0
WellX	12	11208	274.453	1610.49	538.882	7606249	678.645	1
WellX	13	11747	343.974	1872.77	1562.49	6583474	560.439	4
WellX	2	7733	281.864	369.144	440.9	1081809	139.895	1
WellX	3	13546	365.45	882.973	475.708	7605000	561.42	5
WellX	4	11332	334.74	1008.94	1526.12	5513025	486.501	4
WellX	5	12982	320.714	1016.02	1681.47	6847422	527.455	1
WellX	7	9720	348.316	1137.04	714.088	9016307	927.604	0
WellX	8	9577	252.669	1126.87	1552.41	1452286	151.643	1
WellX	9	22414	280.724	1151.44	1847.44	8092567	361.05	2
WellX	10	11716	228.237	1178.54	1655.86	1834496	156.58	1
WellX	11	12936	333.204	1225.27	1978.83	6400240	494.762	10
WellX	12	11231	234.62	1302.92	1518.03	6676158	594.44	1
WellX	13	11164	234.094	1383.88	1680.7	5206264	466.344	1
WellX	14	14285	272.104	1481.98	1839.74	5437172	380.621	4
WellX	15	15744	300.158	1564.5	1658.28	9691739	615.583	1
WellX	16	8232	287.755	1632.48	1506.15	1380656	167.718	2
WellX	17	9353	258.302	1807.51	1622.09	1425833	152.447	1
WellX	18	7622	294.791	1912.03	389.556	1335368	175.199	0
WellX	19	8538	386.274	1926.48	638.299	5490529	643.07	1
WellX	20	10104	277.492	1952.15	1580.88	6657263	658.874	1
WellX	21	10344	255.428	1974.83	1441.57	1693152	163.684	5
WellX	22	8153	394.94	2001.93	720.67	5064505	621.183	1
WellX	23	8948	323.983	2014.78	1295.26	5777728	645.7	0
WellX	1	6392	236.255	35.722	662.614	3476285	543.849	0
WellX	2	19126	234.245	85.5233	1917.83	9660869	505.117	2
WellX	3	8663	240.621	68.1415	530.35	4260310	491.782	11
WellX	4	15675	242.285	107.767	829.469	9872976	629.855	2
WellX	5	8564	236.491	146.112	1749.44	3999728	467.04	2
WellX	6	9765	215.898	303.718	293.15	1255980	128.621	3
WellX	7	10590	222.773	908.197	91.5008	1377929	130.116	4
WellX	8	8960	260.328	1704.43	310.355	1263913	141.062	1
WellX	1	7282	242.776	34.5828	325.582	3609160	495.628	1
WellX	3	12109	211.7	57.884	477.202	4380281	361.738	2
WellX	4	9632	230.037	141.983	409.48	1422738	147.71	2
WellX	5	29444	268.369	200.364	710.603	7876347	267.503	2
WellX	6	27198	256.115	360.262	1958.13	8738235	321.282	2
WellX	7	9577	246.19	491.759	1892.95	3772978	393.962	1
WellX	8	10972	216.425	635.817	1940.47	4113888	374.944	1
WellX	9	12965	341.2	798.152	1246.45	9320292	718.881	0
WellX	10	11379	265.495	1082.6	58.8517	4624401	406.398	4
WellX	1	11797	301.147	125.614	1950.99	4797124	406.639	9
WellX	2	28437	303.485	346.537	371.126	4033201	141.829	0
WellX	3	10934	226.293	302.585	571.292	1932364	176.73	1
WellX	4	12724	219.288	330.501	1731.55	5584019	438.857	1
WellX	7	12624	284.684	420.878	229.74	7120400	564.037	6
WellX	8	11486	219.149	428.053	805.778	1740969	151.573	1
WellX	9	15769	258.197	438.765	524.707	10872752	689.502	5
WellX	10	9212	235.422	519.179	1206.29	1134931	123.201	4
WellX	11	10481	247.934	554.32	1960.47	5333826	508.904	1
WellX	12	10965	233.292	615.519	1106.67	1440485	131.371	5
WellX	13	15891	300.69	632.154	393.582	2223386	139.915	1
WellX	14	33052	260.025	665.182	892.138	4512003	136.512	4
WellX	15	13598	302.222	648.383	145.108	5528461	406.564	0
WellX	16	17893	323.897	679.368	651.927	2498144	139.616	1
WellX	17	10960	269.004	800.211	898.339	1653260	150.845	1
WellX	18	11921	255.786	879.251	799.999	1602382	134.417	1
WellX	19	9904	263.504	920.054	1061.55	1497192	151.17	0
WellX	20	12141	257.019	1021.69	842.908	1893282	155.941	0
WellX	21	12274	303.15	1060.42	1269.39	6992897	569.733	2
WellX	22	13755	241.07	1192.25	907.738	5881820	427.613	1
WellX	23	9713	260.111	1215.66	1157.48	1387120	142.811	0
WellX	24	11632	273.023	1248.99	1746.66	5975897	513.746	2
WellX	25	12522	448.257	1419.03	75.1905	1631243	130.27	2
WellX	26	12505	351.074	1526.69	1408.81	11040015	882.848	0
WellX	27	21176	444.552	1606.15	603.275	9802842	462.922	1
WellX	28	10631	235.564	1572.13	213.625	1516516	142.65	0
WellX	29	11159	352.716	1635.25	755.204	9194313	823.937	3
WellX	1	13459	280.666	224.652	1037.34	6082761	451.947	6
WellX	2	10269	230.931	273.679	843.638	4811105	468.508	1
WellX	3	11973	314.007	501.35	1040.54	7456800	622.801	2
WellX	4	13982	361.395	1040.87	537.313	8130726	581.514	7
WellX	5	12830	398.08	1264.32	417.615	11295702	880.413	9
WellX	6	7306	388.99	1468.35	520.706	4972616	680.621	3
WellX	7	7405	354.658	1543.35	454.161	1492799	201.593	2
WellX	8	8814	389.373	1552.26	578.479	5962778	676.512	0
WellX	9	7543	359.136	1634.09	491.023	3913634	518.843	3
WellX	10	14111	393.415	1649.25	622.618	2844167	201.557	0
WellX	11	7542	322.004	1736.51	500.6	1353162	179.417	2
WellX	12	8914	316.095	1750.47	630.286	1596758	179.129	0
WellX	1	10128	212.488	226.04	1285.63	1583919	156.39	0
WellX	2	9418	224.602	407.663	1310.97	1295865	137.594	4
WellX	3	10322	225.487	550.711	1409.42	1456186	141.076	0
WellX	4	10120	227.859	610.591	1309.97	1387499	137.105	0
WellX	5	18322	238.531	645.412	1514.55	5067382	276.574	3
WellX	6	8485	331.023	897.358	634.632	6166541	726.758	1
WellX	7	12404	210.103	924.394	1798.74	5004901	403.491	1
WellX	8	8519	331.42	953.938	535.898	6641722	779.636	2
WellX	9	13481	322.558	1239.08	1290.58	8337853	618.489	2
WellX	10	9735	260.814	1284.65	1167.27	1594519	163.792	0
WellX	11	12234	301.718	1338.61	1640.68	5684337	464.634	4
WellX	12	10444	258.467	1401.56	1043.34	1622733	155.375	0
WellX	13	9607	251.13	1426.51	1741.11	1391884	144.882	3
WellX	14	12874	333.251	1451.39	122.831	8595811	667.688	1
WellX	15	9868	266.422	1519.77	1663.08	4039577	409.361	3
WellX	16	9469	246.405	1597.8	1813.64	1219236	128.761	2
WellY	1	61397	296.438	191.254	637.892	22276886	362.833	2
WellY	2	8913	247.363	133.519	813.973	1456958	163.464	1
WellY	3	9822	225.931	230.206	456.127	1436191	146.222	0
WellY	4	10467	280.968	243.977	890.19	5307003	507.022	1
WellY	5	9905	290.486	261.715	794.572	4155743	419.56	1
WellY	6	9912	220.739	375.442	293.611	1246754	125.782	1
WellY	7	10892	265.455	393.336	781.703	1624721	149.166	1
WellY	8	11551	339.224	1126.06	551.438	9905847	857.575	3
WellY	9	11399	340.414	1204.41	459.997	10847297	951.601	2
WellY	10	10822	260.768	1331.98	423.479	1615659	149.294	5
WellY	11	11389	328.953	1520.34	1535.31	7131773	626.198	5
WellY	12	11951	329.482	1666.63	888.459	8830804	738.918	5
WellY	13	16666	314.703	1779.69	738.431	12802980	768.21	6
WellY	14	9392	248.277	1867.7	1585.98	1347895	143.515	6
WellY	15	9416	250.951	1937.03	760.132	1399510	148.631	3
WellY	1	14089	245.023	102.831	256.188	6984861	495.767	1
WellY	2	10441	239.762	147.081	1122.13	6666042	638.449	3
WellY	3	11748	235.792	332.421	1148.27	6321251	538.07	3
WellY	4	10379	214.502	336.633	304.537	1411659	136.011	5
WellY	5	24026	228.259	366.876	903.768	12034579	500.898	0
WellY	6	12330	195.616	416.058	1304.92	1588216	128.809	2
WellY	7	16362	248.01	457.171	1729.48	10367613	633.64	2
WellY	8	12592	238.01	456.051	255.88	6689271	531.232	2
WellY	9	9847	370.423	1672.6	1821.71	4871799	494.75	0
WellY	10	10495	270.445	1773.07	1886.05	5566237	530.37	4
WellY	11	11024	277.917	1841.96	1971.96	5251949	476.41	3
WellY	12	9729	249.302	1957.2	1736.93	1331933	136.903	2
WellY	13	9845	246.635	1994.31	1996.96	1882072	191.17	0
WellY	14	6951	320.984	1997.57	1868.02	3702480	532.654	0
WellY	2	7393	320.219	24.4671	1265.51	1997755	270.223	0
WellY	4	15940	284.862	855.808	1988.45	5069598	318.043	1
WellY	5	10451	254.972	1143.07	1668.76	5891529	563.729	2
WellY	6	9739	250.353	1249.02	1939.8	2209406	226.862	1
WellY	8	24016	307.546	1361.85	1829.52	13057446	543.698	3
WellY	9	33583	349.739	1425.85	456.615	19793927	589.403	5
WellY	10	10600	259.065	1384.31	252.561	3673919	346.596	4
WellY	12	24436	290.138	1501.28	1903.41	8342367	341.397	6
WellY	13	11278	236.261	1502.42	98.7422	1624501	144.042	3
WellY	15	14090	349.286	1586.59	504.943	9048185	642.171	4
WellY	16	14638	218.499	1594.09	262.121	2394468	163.579	6
WellY	17	12730	326.345	1624.57	1982.09	6111523	480.088	4
WellY	18	10448	219.022	1681.82	51.7545	1430549	136.921	1
WellY	19	10507	324.362	1691.09	1014.88	6060050	576.763	2
WellY	20	14373	215.856	1728.92	298.008	7250850	504.477	7
WellY	21	9662	356.172	1763.72	895.826	5749402	595.053	8
WellY	22	8845	377.443	1829.48	980.915	4978866	562.902	5
WellY	23	10364	336.335	1868.56	1073.3	5047025	486.977	6
WellY	1	16953	247.752	289.149	1088.66	7427843	438.143	7
WellY	2	17358	265.398	356.031	718.948	8834457	508.956	2
WellY	4	24012	344.622	449.354	1029.08	4676631	194.762	15
WellY	5	10419	243.895	435.016	437.456	1442050	138.406	2
WellY	6	23363	321.861	489.949	279.844	3122866	133.667	3
WellY	7	8766	272.398	483.433	543.499	1339294	152.783	0
WellY	8	18193	231.364	528.288	1249.64	7729839	424.88	9
WellY	9	11991	235.489	514.7	921.428	2967972	247.517	0
WellY	10	14454	333	583.075	596.146	7322407	506.601	0
WellY	11	16337	289.663	630.26	1115.41	6387080	390.958	5
WellY	12	18105	306.497	685.018	497.479	2644074	146.041	2
WellY	13	12001	219.808	657.811	236.554	1521857	126.811	2
WellY	14	11871	237.145	725.955	942.036	4747981	399.965	0
WellY	15	17141	259.22	769.217	1398.53	2311829	134.871	7
WellY	16	12139	232.314	770.84	166.427	1780643	146.688	2
WellY	17	17304	295.767	806.282	1133.98	9345319	540.067	4
WellY	18	9768	479.665	828.755	459.946	1734011	177.52	3
WellY	19	7806	295.989	826.466	64.8303	3515364	450.341	3
WellY	20	9437	286.486	858.347	1034.44	1939147	205.483	4
WellY	21	14064	356.827	887.094	195.127	6520157	463.606	2
WellY	22	9465	258.693	920.727	1239.02	1500648	158.547	5
WellY	23	11951	247.071	954.468	1427	6370689	533.067	4
WellY	24	7816	346.965	942.541	356.393	3601957	460.844	1
WellY	25	19158	267.388	978.861	144.107	4389450	229.118	0
WellY	26	9613	296.742	1036.99	2003.67	3957298	411.661	5
WellY	27	13284	370.7	1057.76	1005.48	8949757	673.725	5
WellY	28	12894	302.657	1070.19	1580.6	6301977	488.753	0
WellY	29	19276	243.095	1174.02	1495.81	2722929	141.26	6
WellY	30	13089	309.245	1153.82	1892.44	5845291	446.58	7
WellY	31	9637	245.643	1340.1	89.971	4886128	507.018	1
WellY	32	13904	297.798	1400.13	1650.18	5440250	391.272	2
WellY	33	27573	381.425	1580.78	97.0288	12763871	462.912	4
WellY	34	8851	307.299	1800.61	988.69	6637333	749.896	2
WellY	1	14429	300.196	493.449	929.171	8598913	595.947	2
WellY	2	17463	260.227	520.804	258.001	2295533	131.451	2
WellY	3	36294	298.385	708.261	428.551	14642515	403.442	4
WellY	4	11225	271.974	615.876	785.495	5881138	523.932	2
WellY	5	14366	321.978	648.557	258.466	5793825	403.301	9
WellY	6	17231	309.101	739.24	765.474	2939755	170.608	0
WellY	7	9277	254.461	747.767	175.969	1250013	134.743	2
WellY	8	20376	294.772	778.458	622.238	12513717	614.14	0
WellY	9	11251	233.938	839.169	223.705	1459618	129.732	3
WellY	10	9597	324.483	961.889	847.346	6386871	665.507	0
WellY	11	15381	254.878	1020.59	390.472	7078960	460.241	3
WellY	12	5931	262.308	1041.36	26.5569	2455210	413.962	2
WellY	13	13004	291.125	1050.42	634.766	8049939	619.036	3
WellY	14	13410	254.162	1092.94	199.753	7333631	546.878	4
WellY	15	14452	332.633	1104.26	1072.77	9876439	683.396	0
WellY	16	10317	277.12	1134.31	293.801	1941525	188.187	0
WellY	17	12624	329.744	1146.78	545.835	8717095	690.518	2
WellY	18	16095	340.837	1196.57	427.916	5948351	369.578	3
WellY	19	10150	256.767	1177.35	1370.43	5338207	525.932	1
WellY	20	27130	292.973	1232.26	1657.19	10944971	403.427	4
WellY	21	10929	263.305	1284.69	1231.06	6349155	580.946	1
WellY	22	10630	229.956	1439.77	1697.46	1750849	164.708	1
WellY	23	10558	288.401	1570.01	749.059	1580507	149.698	5
WellY	24	11380	278.217	1724.57	1844.83	6467006	568.278	5
WellY	1	8307	260.192	530.98	1123.66	2724703	328.001	0
WellY	2	16249	243.665	651.648	1467.3	9672262	595.253	3
WellY	3	18087	280.725	689.797	951.567	5506870	304.466	3
WellY	4	10498	259.314	751.153	1034.43	1591285	151.58	3
WellY	5	11672	251.564	797.652	809.972	2189470	187.583	3
WellY	6	13348	221.348	795.445	1181.95	1864650	139.695	2
WellY	7	13832	208.312	851.327	1315.74	4765621	344.536	1
WellY	8	13661	277.36	875.952	1661.46	5942868	435.024	5
WellY	9	14090	226.379	930.694	1463.73	7278433	516.567	4
WellY	10	13371	252.393	960.715	831.865	4280578	320.139	0
WellY	11	21301	277.095	1007.31	945.845	3563799	167.307	3
WellY	12	10634	258.121	964.414	1132.89	1728335	162.529	0
WellY	13	10035	256.548	966.054	1233.13	1624240	161.857	0
WellY	14	10426	408.75	966.85	391.395	8639543	828.654	1
WellY	15	13161	222.257	989.424	1691.81	6722321	510.776	6
WellY	16	8796	313.259	1060.66	731.057	3170006	360.392	1
WellY	17	15545	289.007	1081.43	1381.26	7293464	469.184	7
WellY	19	12799	331.226	1111.4	305.875	6001718	468.921	6
WellY	20	15844	336.158	1174.29	1517.18	8884740	560.764	3
WellY	21	11456	245.103	1176.91	1216.23	3349789	292.405	1
WellY	22	10794	266.572	1174.94	1088.04	1635047	151.477	6
WellY	23	28834	337.782	1224.56	880.588	19992399	693.362	7
WellY	24	10855	274.401	1444.99	747.488	1478481	136.203	4
WellY	25	10315	302.072	1893.07	73.2426	1326094	128.56	2
WellY	26	8630	304.983	1892.35	686.962	5696795	660.115	3
WellY	1	13884	220.47	68.6654	406.499	4490845	323.455	5
WellY	2	9844	205.129	118.943	60.8961	4980893	505.983	0
WellY	3	8586	282.44	1137.41	842.752	2655699	309.306	0
WellY	5	10803	285.813	1303.92	959.042	3311819	306.565	3
WellY	6	7535	260.712	1338.16	801.428	3158955	419.238	0
WellY	3	170301	573.14	1201.42	813.694	21399943	125.66	0
WellY	4	8660	225.882	451.765	1577.52	1381688	159.548	1
WellY	5	8725	239.652	598.439	1482.37	2887742	330.973	0
WellY	6	13536	271.748	662.643	558.245	6949064	513.376	4
WellY	7	11607	313.09	691.883	1571.73	1614643	139.109	0
WellY	8	24068	289.093	882.307	477.503	14532320	603.803	4
WellY	9	14847	245.293	879.054	598.706	7302505	491.851	3
WellY	10	8574	241.153	910.15	1836.74	1115169	130.064	2
WellY	11	9396	300.944	994.63	949.209	6273300	667.656	3
WellY	12	13968	338.479	1141.34	1460.99	8532432	610.856	2
WellY	13	10574	347.66	1168.61	1056.45	7382114	698.138	3
WellY	14	13051	313.357	1294.6	1264.99	8969027	687.229	3
WellY	15	8426	263.615	1433.12	179.768	1201872	142.638	2
WellY	16	11508	293.81	1850.37	257.261	6646779	577.579	5
WellY	1	6976	231.471	42.596	1661.54	842619	120.788	0
WellY	2	10211	247.22	756.597	1192.81	1560118	152.788	7
WellY	3	10693	220.98	783.742	1395.78	1615122	151.045	6
WellY	4	30743	305.563	897.521	1048.67	18541585	603.116	5
WellY	5	15023	287.196	872.961	1282.94	8810790	586.487	8
WellY	6	11745	275.56	1001.26	1983.9	5150222	438.503	3
WellY	7	18255	297.671	1039.13	671.821	11204858	613.797	6
WellY	8	10447	322.383	1068.72	458.264	1531676	146.614	2
WellY	9	21600	242.393	1170.68	1255.59	3045959	141.017	11
WellY	10	11972	243.569	1155.59	976.014	1645520	137.447	2
WellY	11	7808	251.588	1161.06	1581.38	1041301	133.363	2
WellY	12	10955	325.176	1232.64	321.079	9027665	824.068	1
WellY	13	18234	329.835	1330.59	431.67	3515382	192.793	0
WellY	14	33796	270.568	1405.95	989.736	5133533	151.898	1
WellY	15	11392	259.44	1419.2	1115.72	1530706	134.367	5
WellY	16	14020	298.238	1441.78	245.624	10709615	763.881	1
WellY	17	11256	280.077	1527.25	345.789	9063013	805.172	0
WellY	18	11189	255.458	1550.56	1188.72	1546720	138.236	4
WellY	19	16184	282.351	1559.39	1480.53	10242785	632.896	5
WellY	20	12657	230.911	1641.53	1339.81	1808108	142.854	4
WellY	21	10684	256.651	1654.26	1148.9	1420223	132.93	0
WellY	22	15284	208.784	1809.38	1246.36	2193322	143.504	6
WellY	23	6658	225.722	2022.07	1100.48	3399917	510.651	3
WellY	3	13556	284.858	252.503	537.609	7344987	541.826	6
WellY	4	15962	253.839	1010.94	1695.25	6227757	390.161	11
WellY	5	16105	250.354	1036.57	1506.44	6554766	407.002	8
WellY	7	15735	260.894	1088.37	1844.74	6271060	398.542	12
WellY	8	17678	241.368	1174.97	1661.81	6696449	378.801	7
WellY	9	12956	328.85	1228.12	732.877	9025692	696.642	3
WellY	10	11730	249.339	1268.36	1334.24	6505243	554.582	2
WellY	11	13387	229.41	1307.93	1453.09	6830455	510.23	2
WellY	12	13232	297.086	1364.05	1175.6	9343745	706.148	5
WellY	13	14630	258.352	1395.3	1365.98	8179725	559.106	0
WellY	14	12528	260.799	1435.93	1484.67	7871090	628.28	1
WellY	15	21904	315.891	1592.82	1359.43	11070643	505.416	2
WellY	16	10139	231.016	1590.8	1973.41	1264378	124.704	1
WellY	17	9326	309.322	1616.45	1503.71	6329458	678.689	2
WellY	18	13303	274.583	1771.48	1608.91	9298779	698.999	2
WellY	19	11630	253.822	1779.87	1103.26	5764647	495.67	1
WellY	20	15146	248.158	1805.37	1424.64	7554396	498.772	2
WellY	21	12333	239.88	1823.2	1282.53	7764390	629.562	3
WellY	22	12277	222.685	1958.9	1046.82	1776090	144.668	1
WellY	23	9318	240.805	2004.55	1426.7	1872787	200.986	1
WellY	24	8635	253.454	2009.82	1213.63	5025568	582	1
WellY	1	11727	258.055	540.652	39.0802	5376618	458.482	2
WellY	2	11761	226.499	790.808	191.9	1530678	130.149	2
WellY	4	7965	343.568	911.312	856.369	1641841	206.132	3
WellY	5	8372	342.995	924.27	683.374	1687673	201.585	3
WellY	6	13682	295.205	952.71	467.831	9126020	667.009	1
WellY	7	10739	290.219	961.056	1017.64	5117127	476.499	1
WellY	8	9266	662.937	1013.81	754.925	14647098	1580.74	0
WellY	9	13152	219.169	1060.07	1880.98	4995141	379.801	0
WellY	10	32791	331.276	1122.01	925.391	19684864	600.313	3
WellY	11	33290	319.815	1118.57	189.056	8143559	244.625	8
WellY	12	6472	279.531	1113.41	33.4875	2461264	380.294	2
WellY	13	12258	256.129	1145.64	1110.03	7555166	616.346	1
WellY	14	11636	265.753	1220.26	387.228	1695010	145.669	5
WellY	16	12545	319.082	1268.47	737.093	9067059	722.763	1
WellY	17	13477	316.777	1300.53	1964.59	6167610	457.64	1
WellY	18	14400	278.791	1339.41	49.6366	5860087	406.95	5
WellY	19	10734	258.906	1347.28	1080.59	1541716	143.629	1
WellY	20	11467	304.516	1395.73	520.637	6779534	591.221	2
WellY	21	15602	273.287	1458.19	209.013	9996196	640.7	3
WellY	22	14810	309.644	1461.53	322.833	9918208	669.697	2
WellY	23	10483	243.796	1464.92	1924.2	1462491	139.511	1
WellY	24	12261	226.723	1494.68	1763.68	1907133	155.545	1
WellY	26	12453	219.725	1569.94	1618.65	3988227	320.262	0
WellY	27	16429	266.53	1626.81	404.642	9009649	548.399	2
WellY	28	16286	300.219	1658.64	1847.72	10994748	675.104	9
WellY	29	15568	235.978	1696.7	203.042	7947822	510.523	5
WellY	30	10236	272.245	1748.33	1318.58	6663299	650.967	1
WellY	31	10589	216.867	1742.57	70.2953	1359418	128.38	1
WellY	32	10134	258.411	1757.59	517.637	3297725	325.412	1
WellY	33	13423	204.072	1845.68	189.109	1783019	132.833	2
WellY	34	6201	301.989	2011.38	482.054	1015487	163.762	1
WellY	35	7170	241.569	2015.3	1488.73	943060	131.529	1
WellY	1	11109	226.971	284.64	1799.56	5247949	472.405	4
WellY	2	9533	250.662	378.52	1826.84	1931122	202.572	5
WellY	3	10221	234.888	456.471	1653.12	1676787	164.053	3
WellY	4	9907	231.055	504.955	1846.07	1326331	133.878	2
WellY	5	12585	286.118	622.4	1727.72	6528388	518.744	8
WellY	6	13994	290.531	648.772	1465.3	8000206	571.688	4
WellY	7	9833	229.704	952.829	2003.14	1343259	136.607	3
WellY	8	12252	294.654	1107.1	73.889	6308659	514.909	1
WellY	9	19993	283.969	1277.74	68.1489	7875951	393.935	5
WellY	10	11959	269.847	1402.33	1604.52	5884295	492.039	2
WellY	11	11732	223.352	1436.43	88.2929	5106467	435.26	2
WellY	12	9001	277.618	1497.46	2000.17	5759284	639.849	2
WellY	13	13408	274.741	1509.27	1729.24	6075060	453.092	3
WellY	14	12028	279.156	1560.18	1857.53	5251691	436.622	1
WellY	1	10682	203.166	151.747	220.312	1378015	129.003	2
WellY	2	13981	280.008	163.265	603.772	6154527	440.206	5
WellY	3	14190	237.287	277.486	329.803	6175791	435.221	4
WellY	4	10536	185.964	303.459	63.1447	3897234	369.897	4
WellY	5	11996	219.241	316.403	755.406	1721746	143.527	6
WellY	6	13282	208.663	354.271	625.11	1872888	141.009	0
WellY	7	16245	253.169	415.412	148.192	6647959	409.231	4
WellY	8	12290	218.524	418.49	365.082	1738546	141.46	3
WellY	9	21857	274.827	502.265	698.713	9187302	420.337	8
WellY	10	12716	315.377	510.219	889.92	7299401	574.033	3
WellY	11	42331	270.577	600.204	352.085	20246519	478.291	10
WellY	12	12976	243.671	624.495	73.9607	7026171	541.474	1
WellY	13	24896	259.106	638.422	685.737	10649796	427.771	2
WellY	14	12741	211.463	772.19	126.769	5318856	417.46	2
WellY	15	12197	278.936	974.348	1738.11	5716511	468.682	3
WellY	19	15094	308.905	1955.87	1413.39	11902186	788.538	11
WellY	20	7792	296.081	2009.4	1291.66	1230785	157.955	1
WellY	1	8044	248.276	82.926	720.224	1062620	132.101	0
WellY	2	10320	219.562	279.306	955.764	1332048	129.074	6
WellY	3	11691	275.292	715.073	1641.44	6346020	542.812	4
WellY	4	11182	274.084	790.418	1719.76	5307344	474.633	1
WellY	5	9850	236.192	819.998	1411.82	3899708	395.909	2
WellY	6	9807	275.747	856.26	1203.25	5015081	511.378	2
WellY	7	14554	334.63	977.237	960.697	8666847	595.496	10
WellY	8	10419	271.979	984.271	1159.5	5305956	509.258	5
WellY	9	9507	276.482	993.954	1283.63	5437315	571.928	3
WellY	10	13226	293.545	1189.83	989.645	7951064	601.169	4
WellY	11	24443	345.327	1308.9	832.985	15880685	649.703	8
WellY	12	11383	322.18	1333.62	994.322	7059456	620.175	2
WellY	13	10980	298.459	1425.25	1090.05	7029302	640.191	0
WellY	14	12857	359.028	1523.34	658.873	8138135	632.973	3
WellY	15	8074	329.017	1602.23	515.29	1281880	158.766	0
WellY	16	15319	356.032	1639.27	764.015	10471349	683.553	8
WellY	17	8494	307.456	1658.09	397.714	5401079	635.87	2
WellY	18	9524	249.061	1745.05	1650.92	1230778	129.229	1
WellY	19	8433	307.038	1755.25	556.129	4335090	514.063	3
WellY	20	12495	229.243	1937.9	1980.48	5683398	454.854	1
WellY	1	188365	535.56	978.758	1043.28	26145324	138.801	0
WellY	2	7528	235.105	54.0191	1397.88	945755	125.632	1
WellY	3	10665	214.293	177.171	1159.59	4904537	459.872	2
WellY	4	11728	229.67	227.877	1363.81	4266208	363.763	3
WellY	5	9720	323.668	703.509	57.8379	4621802	475.494	0
WellY	6	9335	380.99	757.345	254.686	2488804	266.61	4
WellY	7	7581	298.975	796.435	162.57	3151105	415.658	6
WellY	8	8698	303.593	825.242	672.608	5321140	611.766	2
WellY	9	12026	472.156	919.076	430.607	8630199	717.628	0
WellY	10	11191	319.001	942.604	686.833	6174749	551.76	1
WellY	11	9144	344.668	959.892	231.05	5155286	563.789	0
WellY	12	17663	392.84	1565.26	401.998	2274648	128.78	0
WellY	1	5935	196.138	24.1944	1097.19	2188919	368.815	1
WellY	2	11854	192.438	69.0592	1637.96	1420366	119.822	1
WellY	4	10711	196.063	72.5949	1404.47	1286877	120.145	3
WellY	5	11811	199.09	99.1093	1809.36	1414324	119.746	0
WellY	6	9461	200.97	117.88	202.747	1137242	120.203	1
WellY	7	10668	215.486	136.88	1955.66	1407152	131.904	3
WellY	8	9506	255.38	699.977	635.966	1247237	131.205	3
WellY	9	11665	232.901	766.661	886.571	1527340	130.934	1
WellY	10	9737	290.15	844.798	1483.96	4731324	485.912	4
WellY	11	9806	264.319	1128.49	1816.05	1516671	154.668	1
WellY	12	18380	220.822	1176.53	1632.84	7285598	396.387	5
WellY	13	11810	240.146	1229.41	1859.13	6776104	573.76	5
WellY	14	8695	320.958	1262.76	492.951	2457101	282.588	1
WellY	15	13180	233.996	1330.4	1526.53	5210685	395.348	1
WellY	16	8508	308.475	1335.97	398.084	4214064	495.306	1
WellY	17	14117	254.86	1436.26	1372.61	7569945	536.229	3
WellY	18	14770	248.731	1466.26	1740.3	1882294	127.44	1
WellY	19	11348	235.054	1485.08	350.041	1588400	139.972	3
WellY	21	11677	274.098	1622.44	1255.07	7744612	663.236	4
WellY	22	6192	193.148	2018.03	143.965	1122280	181.247	1
WellY	24	7229	248.411	2024.16	1528.34	989571	136.889	1
WellY	3	10485	203.005	67.1531	939.009	2130520	203.197	2
WellY	4	17798	217.269	74.9583	99.3591	4259534	239.327	4
WellY	5	11826	199.493	83.0198	1323.73	3673344	310.616	2
WellY	6	10334	203.623	132.589	1702.91	1290155	124.846	1
WellY	7	11308	226.735	192.857	942.784	4717038	417.142	1
WellY	8	12807	200.036	265.246	1022.61	2897426	226.238	2
WellY	9	43272	261.19	366.148	814.285	11982227	276.905	2
WellY	10	11055	239.132	503.047	308.375	6245431	564.942	0
WellY	11	17483	271.662	535.603	635.971	2340315	133.862	1
WellY	12	10479	236.317	603.264	929.275	1491333	142.316	0
WellY	13	7496	358.501	916.862	679.157	1076223	143.573	0
WellY	14	21070	338.31	995.821	1185.15	10669707	506.393	12
WellY	15	12830	320.396	1160.64	77.5982	8378113	653.01	3
WellY	16	8659	299.485	1155.98	1421.33	7465100	862.12	2
WellY	17	10128	295.415	1162.37	674.32	6874869	678.798	0
WellY	18	6250	345.679	1270.19	1440.47	915364	146.458	1
WellY	19	11107	333.369	1340.03	733.671	10937759	984.763	1
WellY	20	10166	287.133	1498.1	1512.07	8953158	880.696	1
WellY	21	7279	386.744	1488	783.587	3459700	475.299	0
WellY	22	24686	243.487	1631.66	1327.76	13654073	553.11	4
WellY	23	10987	266.085	1700.7	1126.77	6951474	632.7	2
WellY	24	11802	247.148	1711.26	1448.81	5943208	503.576	3
WellY	25	13212	234.341	1829.8	1231.84	6718356	508.504	0
WellY	26	12136	229.842	1882.12	1401.75	5372385	442.682	1
WellY	27	12209	226.199	1916.4	1120.48	1754780	143.728	0
WellY	28	11888	226.03	1950.04	1507.03	1952029	164.202	0
								0
WellY	1	24646	209.612	178.315	1154.89	11526959	467.701	5
WellY	2	9670	205.435	267.759	242.347	1236014	127.819	2
WellY	3	10289	190.962	328.257	127.937	1270879	123.518	1
WellY	4	17915	239.058	391.406	253.316	6263063	349.599	3
WellY	5	9941	239.991	499.951	303.439	5706759	574.063	4
WellY	6	8312	222.394	775.514	2008.4	5072077	610.211	0
WellY	7	12892	268.293	927.202	1787.92	1620368	125.688	11
WellY	8	13053	200.434	933.956	1990.43	5455456	417.947	5
WellY	9	11621	361.996	984.497	799.002	7857244	676.125	1
WellY	10	15025	245.098	1192.88	1948.22	8479572	564.364	3
WellY	11	5932	285.262	1373.38	2009.32	2619869	441.65	3
WellY	12	11434	330.437	1382.14	1757.89	6208290	542.967	5
WellY	13	12546	328.868	1411.24	1901.74	6315631	503.398	4
WellY	14	16016	312.783	1481.33	773.069	2094156	130.754	7
WellY	15	12100	271.967	1489.18	517.766	9876520	816.241	2
WellY	16	9190	254.686	1505.32	1985.47	4195273	456.504	2
WellY	17	12302	241.751	1559.43	1533.39	7722362	627.732	1
WellY	18	12823	321.222	1581.7	1841.72	8072446	629.529	4
WellY	19	11326	244.62	1652.27	685.924	1575809	139.132	4
WellY	21	5271	219.654	1684	27.4696	2824667	535.888	1
WellY	22	11961	233.385	1742.19	1999.69	2334607	195.185	1
WellY	23	12017	222.488	1724.84	413.971	7162581	596.037	2
WellY	24	10576	227.622	1737.67	1744.14	1425742	134.809	0
WellY	25	10300	233.374	1797.5	1644.56	1359889	132.028	3
WellY	26	46769	289.324	1913.8	643.51	31460497	672.678	3
WellY	27	11555	213.993	1851.79	1947.26	1508170	130.521	1
WellY	28	13190	200.503	1883.4	1798.42	3250253	246.418	1
WellY	29	22650	366.243	1913.1	919.042	27625837	1219.68	6
WellY	30	10388	227.111	1905.2	1598.09	1391854	133.987	3
WellY	32	5340	212.96	2021.17	1626.63	3359754	629.167	2
WellY	33	6364	198.705	2022.99	1916.13	3623704	569.407	2
WellY	2	26186	263.18	823.572	227.595	16467009	628.848	4
WellY	3	11956	254.861	933.441	1969.36	5852812	489.529	2
WellY	4	42757	256.369	1099.61	406.388	6372200	149.033	2
WellY	5	11671	239.698	1017.93	1398.73	9114095	780.918	3
WellY	6	16359	236.186	1050.93	67.0065	10690159	653.473	7
WellY	7	16418	251.168	1107	227.583	8808887	536.538	9
WellY	8	12557	239.898	1137.77	1733.13	6723866	535.468	0
WellY	9	13499	252.204	1242.33	123.134	6548830	485.134	5
WellY	10	17079	233.348	1339.81	261.297	9716714	568.928	4
WellY	11	15311	341.072	1339.96	562.59	16828635	1099.12	7
WellY	12	12300	226.46	1352.64	64.3728	2435959	198.045	0
WellY	13	20189	244.446	1397.22	1343.47	9929130	491.809	6
WellY	14	12244	267.688	1359.66	1481	7450949	608.539	3
WellY	15	26151	258.065	1396.13	1651.76	14310082	547.21	7
WellY	16	24094	274.163	1555.71	1808.96	12476057	517.808	6
WellY	17	13057	228.905	1503.29	1455.92	7421966	568.428	2
WellY	18	16167	246.582	1544.41	387.333	9905960	612.727	12
WellY	19	10153	215.13	1525.64	128.483	1374728	135.401	1
WellY	20	13139	244.922	1550.67	1626.78	6929082	527.368	2
WellY	21	10175	244.116	1637.62	1153.92	1574290	154.721	3
WellY	22	12624	229.197	1646.71	1312.52	7387627	585.205	4
WellY	23	12093	250.874	1683.22	45.2258	6063617	501.415	9
WellY	24	12595	282.993	1690.7	1946.83	7015449	557.003	2
WellY	25	20323	239.476	1714.8	1507.78	13246052	651.776	9
WellY	26	12561	198.434	1709.45	188.118	5070542	403.673	3
WellY	27	12642	220.272	1714.11	387.242	8735500	690.99	3
WellY	28	39406	255.878	1771.2	1757.86	22185721	563.004	10
WellY	29	10733	246.291	1781.62	1263.23	4641878	432.487	7
WellY	30	14057	224.014	1850.38	231.651	8377775	595.986	4
WellY	31	9806	240.239	1838.66	1960.69	5432239	553.971	2
WellY	32	10915	227.607	1886.53	1193.41	1604990	147.044	0
WellY	33	17698	255.908	1928.51	1596.83	12507424	706.714	11
WellY	34	14650	300.808	1932.17	1382.76	9869308	673.673	5
WellY	35	15666	232.196	2002.47	1788.63	2218603	141.619	2
WellY	37	5504	260.84	2023.07	1213.7	3782631	687.251	1
WellY	1	6701	201.647	30.0922	340.774	906338	135.254	3
WellY	3	9341	212.229	43.9779	772.756	5496501	588.427	3
WellY	4	12714	186.274	90.984	485.361	5067434	398.571	0
WellY	5	8514	218.305	180.021	249.21	4450114	522.682	2
WellY	6	10912	331.569	292.479	473.525	6490232	594.779	0
WellY	7	8037	252.883	284.087	367.42	1254675	156.112	0
WellY	8	12079	282.463	649.854	1122.77	6991760	578.836	7
WellY	9	10465	301.527	700.306	1012.12	6839607	653.57	5
WellY	10	14131	273.487	713.72	1252.05	7959372	563.256	5
WellY	11	10834	327.452	777.454	1098.44	7384627	681.616	1
WellY	12	11240	237.781	816.772	1908.41	5981617	532.172	2
WellY	14	11039	274.089	891.967	185.143	6791985	615.272	2
WellY	15	23302	273.11	985.601	228.688	14706228	631.114	5
WellY	16	11563	216.608	932.396	68.7892	5730715	495.608	1
WellY	17	20099	304.213	1044.41	340.557	13885129	690.837	3
WellY	18	12987	254.89	1140.96	158.994	7759873	597.511	2
WellY	1	9537	198.707	45.5397	1717.79	1211259	127.006	2
WellY	2	11215	195.255	93.948	1592.75	1368902	122.06	3
WellY	3	14805	243.866	116.558	1377.42	8300052	560.625	3
WellY	4	13312	235.558	192.381	1914.97	5889175	442.396	4
WellY	5	11991	196.065	200.138	1522.78	1632685	136.159	3
WellY	6	14381	260.548	305.84	1729.06	2719925	189.133	3
WellY	7	10227	201.133	413.57	1997.91	1214663	118.77	1
WellY	8	12956	216.558	609.427	1985.04	6621616	511.085	7
WellY	9	12384	218.663	830.787	64.8622	7391972	596.897	3
WellY	2	7514	197.753	41.8109	1636.89	3718918	494.932	2
WellY	3	8719	193.19	38.5274	1934.33	4312252	494.581	1
WellY	4	15095	209.966	87.6206	1756.41	7868112	521.24	2
WellY	5	31790	234.968	197.775	603.622	17104962	538.061	1
WellY	6	7143	208.388	120.939	2003.22	3219465	450.716	4
WellY	7	11291	176.862	161.501	158.103	1526966	135.237	5
WellY	8	33917	236.571	277.367	1900.15	16065603	473.674	0
WellY	9	10819	195.178	240.364	286.825	1365177	126.183	3
WellY	10	10333	203.802	312.857	1702.54	1415487	136.987	1
WellY	11	10450	205.905	327.464	793.136	1293481	123.778	0
WellY	12	8564	273.862	408.773	1947.05	3838802	448.249	1
WellY	13	10455	228.868	420.609	572.726	1427754	136.562	3
WellY	14	10051	222.017	469.943	1752.52	4139731	411.873	3
WellY	15	19227	317.926	532.072	454.938	2522193	131.18	7
WellY	16	6399	293.856	497.41	2016.8	3054846	477.394	1
WellY	17	9589	329.283	502.553	1881.69	3984490	415.527	5
WellY	18	10870	212.119	615.236	254.932	1844244	169.664	3
WellY	19	18728	307.189	627.961	1865.25	9004378	480.798	7
WellY	20	10348	304.84	723.37	1997.11	7704322	744.523	1
WellY	21	13011	236.155	713.765	308.824	6021011	462.763	0
WellY	4	15975	216.151	98.7148	244.308	10258281	642.146	16
WellY	6	9360	214.593	133.996	1339.1	4603151	491.79	1
WellY	7	8986	213.164	181.7	1156.33	3267438	363.614	2
WellY	8	10707	191.24	230.734	1714.92	1289366	120.423	3
WellY	10	8360	232.099	300.358	1366.84	1134834	135.746	2
WellY	11	7816	244.479	309.885	1229.98	1086073	138.955	2
WellY	12	13253	218.337	363.754	164.793	6342023	478.535	2
WellY	13	6811	251.567	495.674	29.2006	2887301	423.917	1
WellY	14	7816	278.189	726.852	30.4387	5480616	701.205	3
WellY	15	6407	257.983	794.67	1999.24	3146938	491.172	2
WellY	16	9688	208.913	875.554	1762.91	1199172	123.779	2
WellY	18	11634	290.173	952.255	972.86	8680608	746.141	1
WellY	19	11663	220.504	1017.26	1124.44	3430412	294.128	1
WellY	20	11070	206.054	1023.59	1871.2	3850890	347.867	2
WellY	21	14872	343.911	1329.82	1971.7	3222903	216.709	0
WellY	22	19404	390.331	1610.15	1485.7	15432782	795.34	5
WellY	1	8433	275.872	685.341	410.302	1057103	125.353	0
WellY	2	11216	250.215	765.152	542.106	9244975	824.267	2
WellY	3	11349	224.83	783.697	328.467	1448960	127.673	3
WellY	4	10592	199.02	860.444	39.3058	2256895	213.075	0
WellY	5	10632	264.191	877.339	422.843	1892122	177.965	2
WellY	6	9330	280.093	969.24	532.849	1508535	161.686	0
WellY	7	15992	265.199	1392.33	952.474	2336505	146.105	2
WellY	1	8599	233.165	105.809	2003.68	3436490	399.638	7
WellY	2	12977	249.917	265.579	1900.08	6031603	464.792	1
WellY	3	9238	313.288	486.508	49.3014	4770504	516.4	0
WellY	4	7610	286.142	523.209	556.328	5956291	782.693	3
WellY	5	11485	225.753	595.844	1249.43	6305977	549.062	4
WellY	6	8562	362.567	670.015	109.437	4432140	517.652	2
WellY	7	20088	342.796	831.796	687.308	10065113	501.051	0
WellY	8	17081	295.47	838.835	434.197	9546051	558.87	0
WellY	9	10877	295.627	984.108	657.794	8160891	750.289	3
WellY	10	15307	314.644	1050.43	860.263	10707118	699.492	6
WellY	11	15610	314.018	1091.32	543.886	9834589	630.019	11
WellY	12	10252	281.862	1081.91	729.311	3546078	345.891	2
WellY	13	26287	303.147	1313.11	589.43	20952929	797.083	12
WellY	14	15121	331.225	1292.46	837.899	12078874	798.814	12
WellY	15	9942	296.586	1519.77	601.964	9388030	944.28	0
WellY	1	9609	206.284	397.711	1520.66	3604230	375.089	4
WellY	2	11254	217.553	593.73	1687.62	1437024	127.69	4
WellY	3	8041	253.509	632.568	38.4445	4506468	560.436	4
WellY	4	12036	189.453	752.239	60.2704	1769564	147.023	0
WellY	5	14147	240.858	917.739	200.947	9493831	671.084	5
WellY	7	12477	241.24	1079.24	117.464	8016301	642.486	2
WellY	8	9474	224.075	1286.21	1723.08	1385216	146.212	1
WellY	9	13184	188.985	1315.47	66.2222	1802991	136.756	4
WellY	10	9403	225.201	1329.09	1998.53	1373691	146.091	1
WellY	11	13432	314.14	1356.12	1263.94	1733769	129.078	1
WellY	12	10029	227.734	1429.41	1848.03	1632893	162.817	3
WellY	13	11641	206.562	1447.08	1589.19	1505022	129.286	1
WellY	14	13379	308.967	1525.44	1491.52	1781024	133.121	1
WellY	15	11644	255.529	1529.58	1786.25	8149768	699.911	4
WellY	16	19644	225.678	1602.28	70.0846	9410578	479.056	5
WellY	17	12189	215.622	1900.51	1876.04	5153180	422.773	3
WellY	18	22022	217.862	1972.73	1640.66	6863133	311.649	7
WellY	19	8099	208.725	1979.31	1996.25	1020164	125.962	3
WellZ	1	15555	293.249	850.808	853.765	9801578	630.124	1
WellZ	2	8774	322.237	905.149	1304.38	6200313	706.669	2
WellZ	3	9943	251.064	912.112	1182.9	1741674	175.166	1
WellZ	4	15108	269.095	962.119	984.661	11491954	760.654	9
WellZ	5	9035	312.106	971.626	1380.9	6478662	717.063	0
WellZ	6	8632	289.507	1025.87	1242.81	4311285	499.454	5
WellZ	7	22918	294.056	1084.57	1128.4	17021108	742.696	2
WellZ	8	12911	301.89	1131.42	1366.74	9561272	740.552	6
WellZ	9	15785	293.386	1566.06	478.247	4230620	268.015	4
WellZ	10	6765	292.516	1570.34	1956.71	1269164	187.607	0
WellZ	11	7452	274.768	1609.98	1460.04	1082574	145.273	4
WellZ	12	7853	272.688	1704.9	1692.43	1065366	135.664	5
WellZ	13	5195	287.322	1720.57	2017.55	963148	185.399	1
WellZ	14	10495	196.663	1819.94	126.137	5718193	544.849	1
WellZ	1	15963	226.578	74.2543	1864.08	4752903	297.745	2
WellZ	2	5818	196.972	49.0873	1988.19	2542675	437.036	0
WellZ	4	34740	254.507	315.422	1908.29	11463906	329.992	3
WellZ	5	11877	211.08	254.536	1794.41	1648434	138.792	1
WellZ	6	13282	251.454	1110.81	1898.55	6930236	521.777	2
WellZ	7	18202	303.839	1480.02	1203.13	10113848	555.645	5
WellZ	8	8252	278.365	1496.65	1370.9	1464616	177.486	0
WellZ	9	13233	277.818	1839.97	1474.29	8012381	605.485	4
WellZ	10	9525	255.753	1953.98	1575.33	3243974	340.575	1
WellZ	11	6365	263.549	2007.61	1494.12	1037736	163.038	1
WellZ	1	14122	288.611	199.599	1420.06	5784403	409.602	4
WellZ	2	10810	243.191	178.354	683.553	5672598	524.755	1
WellZ	3	11553	237.329	230.727	841.187	7011955	606.938	3
WellZ	4	9673	238.396	300.352	597.461	5793619	598.947	9
WellZ	5	8876	215.563	429.937	1871.9	4321412	486.865	2
WellZ	6	12268	210.895	519.402	1564.64	6058529	493.848	2
WellZ	7	9716	259.177	551.135	185.559	5302140	545.712	4
WellZ	8	24485	275.036	1504.23	696.49	11215085	458.039	2
WellZ	9	12767	319.031	1552.7	828.039	10455126	818.918	5
WellZ	10	12510	243.808	1711.62	568.502	9963095	796.41	2
WellZ	12	9922	312.726	1985.5	561.995	3745635	377.508	2
WellZ	14	7077	293.94	2009.94	1155.79	1349715	190.719	3
WellZ	15	6247	385.625	2019.53	780.532	978391	156.618	0
WellZ	1	7771	166.16	424.397	54.7556	2761754	355.392	1
WellZ	1	12877	372.193	779.661	651.366	1796325	139.499	5
WellZ	2	9632	236.63	1257.95	1257.77	5022405	521.429	4
WellZ	4	6143	209.24	1378.15	28.5855	708395	115.317	1
WellZ	5	6730	227.261	1442.88	2007.32	3350245	497.808	0
WellZ	6	10588	221.499	1457.34	1408.49	1452467	137.18	1
WellZ	7	12625	200.017	1481.96	1743.17	2511341	198.918	1
WellZ	8	11306	217.39	1547.23	1501.25	3774602	333.858	0
WellZ	9	12343	212.085	1671.32	1465.89	1819471	147.409	2
WellZ	10	12987	200.981	1952.96	1361.2	3222362	248.122	1
WellZ	1	7542	225.115	95.8931	585.545	1465750	194.345	3
WellZ	3	9398	282.286	201.083	761.655	6225927	662.474	1
WellZ	4	13464	239.744	293.62	139.253	3973665	295.133	2
WellZ	5	6813	267.861	346.151	305.946	930055	136.512	0
WellZ	6	22920	289.149	890.706	525.518	3425307	149.446	3
WellZ	7	14055	255.466	887.908	247.251	9025134	642.13	6
WellZ	8	16169	240.298	954.206	903.855	12739617	787.904	5
WellZ	10	14210	227.847	1022.66	676.361	4132958	290.849	0
WellZ	11	10737	235.008	1010	254.338	2351667	219.025	1
WellZ	12	14447	283.757	1092.15	928.506	10576675	732.102	4
WellZ	13	15857	241.51	1113.22	532.605	11428541	720.725	1
WellZ	14	10981	227.727	1123.81	231.48	1689961	153.899	2
WellZ	15	14492	299.526	1214.16	668.056	11245085	775.951	4
WellZ	16	10570	248.586	1283.11	47.7312	6765734	640.088	0
WellZ	18	11297	207.875	1669.69	1814.71	1343357	118.913	2
WellZ	19	14753	192.503	1926.16	1145.69	1834771	124.366	2
WellZ	20	8992	233.148	2005.83	864.793	1255706	139.647	3
WellZ	21	9198	175.079	2015.96	1754.14	3624079	394.007	2
WellZ	2	8807	354.708	55.6236	793.951	1266704	143.829	1
WellZ	3	7164	241.411	33.4135	1153.56	1142445	159.47	2
WellZ	4	8025	248.808	67.2293	653.21	4300538	535.893	1
WellZ	5	15020	240.566	95.1325	1032.98	7166778	477.149	5
WellZ	6	12212	186.295	140.098	65.6999	5243545	429.376	2
WellZ	7	9721	313.913	186.951	199.771	5910165	607.979	0
WellZ	8	12396	187.44	239.283	1245.44	1791479	144.521	5
WellZ	9	12819	239.177	371.426	1224.78	6675471	520.748	4
WellZ	10	14750	252.977	451.74	1365.19	8328588	564.65	5
WellZ	11	10121	217.136	521.669	1199	1410083	139.322	2
WellZ	12	10578	226.735	682.538	1178.18	1801634	170.319	6
WellZ	13	15473	293.807	729.165	1309.11	15278899	987.456	0
WellZ	14	11385	217.35	971.408	1994.29	7223510	634.476	6
WellZ	15	10980	290.726	1037.27	1118.19	6532635	594.958	1
WellZ	17	10615	229.289	1160.81	1275.14	7462684	703.032	1
WellZ	18	16516	249.636	1227.53	1988.1	9433062	571.147	5
WellZ	19	10812	262.922	1249	833.47	9043132	836.398	1
WellZ	20	9425	329.203	1273.95	510.904	8207634	870.836	0
WellZ	21	11392	301.964	1483.01	643.744	13493739	1184.49	3
WellZ	22	13926	194.814	1638.54	390.833	1668339	119.8	4
WellZ	1	8368	227.389	509.395	1715.34	1201915	143.632	1
WellZ	2	13526	267.006	553.458	1846.43	8025727	593.356	0
WellZ	3	11752	217.428	700.359	490.394	1651761	140.551	6
WellZ	4	11288	228.37	880.124	968.034	1639017	145.2	4
WellZ	5	14069	208.01	890.269	544.157	6703930	476.504	2
WellZ	6	14147	234.247	898.594	768.838	9555764	675.462	4
WellZ	8	11662	234.634	987.928	921.644	6554828	562.067	1
WellZ	9	22985	232.98	1062.26	60.8188	13997556	608.987	3
WellZ	10	12191	283.806	1096.98	1524.78	7802855	640.05	2
WellZ	11	5287	222.12	1270.06	20.6934	2854592	539.927	1
WellZ	12	9991	282.112	1293.55	1163.29	9066305	907.447	1
WellZ	1	11144	182.4	59.3029	333.541	4714557	423.058	2
WellZ	2	7045	203.878	35.6847	657.876	2848829	404.376	3
WellZ	3	12563	187.107	98.5334	794.967	2733183	217.558	1
WellZ	4	23415	242.311	261.398	318.187	13334330	569.478	4
WellZ	5	7675	239.05	241.747	1087.53	3037373	395.749	2
WellZ	6	14098	203.24	292.142	691.727	6891502	488.828	3
WellZ	7	12207	220.865	340.052	416.467	7270367	595.59	4
WellZ	8	11950	206.196	352.162	864.531	4665287	390.401	3
WellZ	9	14494	239.14	450.218	469.615	11116250	766.955	1
WellZ	10	10571	221.356	446.926	303.016	1546460	146.293	1
WellZ	11	9278	191.131	479.832	51.6124	5742007	618.884	1
WellZ	12	7636	255.253	465.631	1108.35	2968758	388.784	2
WellZ	13	13843	226.221	509.919	913.778	7164171	517.53	3
WellZ	14	13815	205.934	538.144	1366.69	6021973	435.901	4
WellZ	15	11263	218.689	568.594	306.081	2277718	202.23	1
WellZ	16	14918	231.971	601.115	1587.05	6587617	441.588	4
WellZ	17	12005	232.627	643.538	1063.19	5846083	486.971	1
WellZ	18	20449	218.737	690.622	1472.51	4206709	205.717	1
WellZ	19	24102	208.299	840.831	1645.75	8824784	366.143	3
WellZ	20	12100	211.469	845.392	1937.73	5814268	480.518	0
WellZ	21	11203	207.071	892.718	1373.66	1516544	135.369	5
WellZ	22	12180	308.394	971.557	696.006	10360531	850.618	2
WellZ	23	12750	183.165	998.112	1741.06	1605711	125.938	0
WellZ	24	7891	314.53	1017.43	885.504	4559913	577.863	3
WellZ	25	16690	224.205	1088.15	1987.05	7558361	452.868	4
WellZ	26	8859	322.188	1094.72	797.669	6731087	759.802	3
WellZ	27	12735	199.654	1113.57	1403.63	1713688	134.565	11
WellZ	28	12899	229.938	1188.31	1010.57	1694780	131.388	0
WellZ	29	12843	213.201	1231.33	1171.57	1557451	121.268	0
WellZ	30	11255	290.036	1262.4	640.963	9269859	823.621	0
WellZ	31	14334	326.545	1292.83	801.376	9528994	664.783	2
WellZ	32	10486	213.686	1270.06	1588.59	1339091	127.703	6
WellZ	33	9186	300.942	1327.89	944.45	1631776	177.637	1
WellZ	34	10941	215.961	1346.16	1424.23	1397440	127.725	6
WellZ	35	10580	251.705	1373.34	1197.75	1341033	126.752	2
WellZ	36	36086	305.767	1502.36	1084.7	11088285	307.274	1
WellZ	37	9956	392.907	1424.24	292.709	6035156	606.183	3
WellZ	38	12152	276.654	1441.28	802.435	2124128	174.797	5
WellZ	39	10593	357.728	1439.54	156.244	6931379	654.336	5
WellZ	40	12977	342.652	1459.96	917.177	8276309	637.768	6
WellZ	41	10919	245.521	1475.3	1238.06	1459857	133.699	2
WellZ	42	9466	304.1	1571.64	846.165	1702107	179.813	6
WellZ	43	10030	279.144	1592.68	727.567	6652843	663.294	4
WellZ	44	11619	241.743	1608.31	1223.51	1539700	132.516	1
WellZ	45	13384	298.267	1644.21	967.975	12086054	903.023	6
WellZ	46	10084	265.156	1728.12	1151.6	1513999	150.139	1
WellZ	47	10631	257.781	1779.24	750.251	2270903	213.611	1
WellZ	48	13798	293.301	1810.01	872.013	10205758	739.655	4
WellZ	49	15093	320.26	1838.33	1027.19	13534625	896.748	2
WellZ	1	14526	236.509	53.5005	1934.34	5926616	408.001	5
WellZ	2	14891	244.472	234.533	1701.87	6910490	464.072	3
WellZ	3	10431	196.064	261.35	1504.28	1234013	118.302	1
WellZ	4	13425	230.952	265.51	1872.56	5859027	436.427	3
WellZ	6	10819	201.325	325.624	1617.73	1467459	135.637	2
WellZ	7	12225	185.086	394.54	1416.9	1528210	125.007	5
WellZ	8	11297	240.217	427.543	1832.71	1429346	126.524	3
WellZ	9	11122	196.441	416.787	1190.72	1348636	121.258	1
WellZ	10	10899	208.888	578.451	1977.87	1401137	128.556	2
WellZ	11	7122	253.593	687.575	2001.51	1156090	162.327	0
WellZ	13	15045	244.948	856.812	137.215	9205852	611.888	3
WellZ	14	12578	233.866	898.947	1201.3	8020519	637.663	0
WellZ	15	13772	270.37	952.164	1952.85	7406180	537.771	9
WellZ	16	11118	248.308	965.584	347.319	6196182	557.311	1
WellZ	17	9875	271.142	959.664	726.221	6969234	705.745	3
WellZ	18	13746	217.352	976.616	932.601	8712265	633.804	2
WellZ	19	13753	210.614	1018.2	1074.68	2138452	155.49	2
WellZ	20	10929	263.712	1009.06	561.223	6935289	634.577	0
WellZ	21	11074	292.012	1058.13	431.649	8282993	747.968	1
WellZ	23	12672	213.266	1111.6	264.791	1728610	136.412	1
WellZ	24	13539	223.906	1159.4	1370.95	9831416	726.155	2
WellZ	25	11841	254.779	1167.88	484.707	2301715	194.385	0
WellZ	26	15829	231.3	1199.52	926.942	9098469	574.797	6
WellZ	27	15154	263.349	1197.67	669.94	9390450	619.668	4
WellZ	28	18268	284.594	1305.98	1206.09	13201236	722.643	2
WellZ	29	12391	254.699	1287.07	763.67	6764567	545.926	4
WellZ	30	15230	248.957	1312.95	445.695	9458224	621.026	2
WellZ	31	13587	190.115	1388.54	142.537	2014421	148.261	1
WellZ	32	12778	247.859	1381.8	632.799	2205889	172.632	2
WellZ	33	11217	236.584	1455.78	337.588	7292107	650.094	5
WellZ	34	13452	224.981	1483.13	1381.35	9253083	687.859	5
WellZ	35	13861	240.343	1486.62	460.009	8588461	619.613	1
WellZ	36	12555	244.07	1515.74	606.851	1812614	144.374	2
WellZ	37	8932	308.227	1524.28	842.771	6907887	773.386	1
WellZ	38	11055	260.661	1618.23	742.008	1578221	142.761	0
WellZ	39	11036	253.933	1647.36	601.987	1825023	165.37	5
WellZ	40	10583	236.643	1701.93	215.614	6809533	643.441	5
WellZ	41	10577	269.255	1745.56	556.39	8426670	796.698	3
WellZ	42	8857	281.135	1735.85	703.859	1404026	158.522	1
WellZ	43	14737	216.236	1783.18	329.428	9124143	619.132	3
WellZ	44	10607	214.914	1782.76	1836.64	1305996	123.126	2
WellZ	45	11784	215.787	1875.19	517.778	2794387	237.134	0
WellZ	46	7673	292.995	1862.02	752.619	4406724	574.316	2
WellZ	47	6022	216.036	1896.64	2020.51	821367	136.394	1
WellZ	48	15124	182.957	1964.42	432.706	5776519	381.944	6
WellZ	49	6190	220.15	2015.06	574.234	2594678	419.173	1
WellZ	50	5767	261.245	2024.6	1784	3335243	578.332	0
WellZ	1	6402	180.421	28.9792	457.35	761857	119.003	0
WellZ	2	8576	282.993	41.2458	683.037	4661922	543.601	1
WellZ	3	15343	184.169	64.9465	1090.86	6104584	397.874	4
WellZ	4	9123	232.186	87.2331	793.965	1749324	191.749	1
WellZ	5	10799	207.629	108.126	169.186	5578276	516.555	3
WellZ	6	9903	239.026	154.908	1261.87	1233856	124.594	2
WellZ	7	10682	229.163	201.145	757.964	6334323	592.99	2
WellZ	8	11754	213.699	234.913	390.824	5306196	451.437	0
WellZ	9	11973	187.472	269.44	195.598	1508736	126.012	3
WellZ	10	11675	205.703	264.758	613.387	7804431	668.474	1
WellZ	11	9632	163.201	306.792	50.371	1129926	117.31	3
WellZ	12	22228	204.947	398.368	249.38	2716337	122.203	5
WellZ	13	10545	192.722	519.252	55.7834	3177866	301.362	2
WellZ	14	30855	240.524	702.673	105.632	8428886	273.177	1
WellZ	15	19976	301.537	831.66	1565.6	5540187	277.342	2
WellZ	16	11312	217.192	816.23	1057.83	1556384	137.587	2
WellZ	17	12204	213.055	887.818	151.963	7131402	584.35	1
WellZ	18	11471	235.461	915.518	363.404	7983399	695.964	1
WellZ	19	10868	280.646	1113.54	400.398	9203354	846.831	1
WellZ	20	14980	261.486	1311.84	1112.64	11249632	750.977	0
WellZ	21	11075	318.639	1436.25	890.544	8965966	809.568	2
WellZ	22	11164	311.135	1604.7	683.442	10726023	960.769	2
WellZ	23	10899	319.249	1616.84	886.368	9912411	909.479	4
WellZ	25	11563	220.788	1955.67	263.175	7606249	657.809	1
WellZ	1	9183	203.541	57.7727	1051.65	2237506	243.657	1
WellZ	2	10107	196.032	63.2736	1202.8	1313391	129.949	2
WellZ	3	8680	229.259	374.287	784.453	1122931	129.37	3
WellZ	4	13024	215.276	608.198	1426.1	11360095	872.243	1
WellZ	5	11770	197.905	668.786	1966.14	7311929	621.234	1
WellZ	6	16551	226.868	682.791	1645.12	7221451	436.315	7
WellZ	7	10619	198.354	752.662	1836.27	1414172	133.174	0
WellZ	8	15625	244.55	778.356	1416.32	8428209	539.405	1
WellZ	9	10391	222.517	957.393	1552.57	5972621	574.788	2
WellZ	10	11924	209.749	1116.39	1806.95	6094391	511.103	6
WellZ	11	12222	223.954	1330.3	1704.05	8122701	664.597	4
WellZ	12	11606	254.004	1354.87	1986.88	8551768	736.84	6
WellZ	13	12116	239.532	1549.27	1993.54	6785454	560.041	5
WellZ	14	10164	225.12	2004	245.776	6455144	635.099	1
WellZ	1	6976	269.255	83.8359	572.494	1525224	218.639	0
WellZ	2	8518	248.481	109.092	484.04	1274318	149.603	2
WellZ	3	14364	270.129	202.368	437.608	7668817	533.891	7
WellZ	4	13326	187.109	282.135	60.8606	5477029	411.003	1
WellZ	5	27061	329.807	364.949	256.669	8306666	306.961	4
WellZ	6	13277	266.246	392.875	715.59	8963834	675.14	3
WellZ	7	15552	278.411	473.569	968.106	8862040	569.833	14
WellZ	8	9575	216.841	467.948	1518.37	1283886	134.087	4
WellZ	9	11705	215.63	529.657	322.806	1557054	133.025	5
WellZ	10	21787	212.833	609.368	140.837	2799148	128.478	6
WellZ	11	17671	266.499	602.698	1131.38	2623104	148.441	3
WellZ	12	15600	298.435	648.397	920.692	2241198	143.667	5
WellZ	13	10508	212.833	693.32	1419.25	1382998	131.614	4
WellZ	14	12648	222.596	745.97	1206.29	6583906	520.549	3
WellZ	15	11838	219.601	838.282	238.927	1717109	145.051	1
WellZ	16	11094	257.901	826.465	900.2	1590216	143.34	1
WellZ	17	14650	199.204	858.869	1490.19	6519921	445.046	3
WellZ	18	12109	236.447	868.045	450.853	1736295	143.389	4
WellZ	19	13954	252.216	904.365	767.419	6902546	494.664	3
WellZ	20	25448	330.818	943.963	1164.61	14643599	575.432	5
WellZ	21	12378	255.311	924.043	918.925	1914595	154.677	0
WellZ	22	9410	261.623	993.016	306.276	1444939	153.554	4
WellZ	23	28262	294.551	1034.39	647.76	14633974	517.797	5
WellZ	24	17599	313.134	1123.25	863.628	12211557	693.878	4
WellZ	25	16027	284.407	1208.19	1261.8	9068341	565.816	6
WellZ	26	10867	221.898	1207.1	1621.26	4654671	428.331	4
WellZ	27	17501	303.692	1249.72	948.707	12895625	736.851	3
WellZ	28	16579	344.123	1264.74	593.131	16728385	1009.01	5
WellZ	29	21905	247.848	1348.19	1287.84	3307462	150.991	5
WellZ	30	20301	324.108	1402.87	1036.82	14587118	718.542	3
WellZ	31	15493	353.714	1478.85	631.927	9145950	590.328	3
WellZ	32	10785	227.177	1481.14	1474.97	1640222	152.084	4
WellZ	33	13957	324.018	1539.68	769.481	12490651	894.938	3
WellZ	34	11287	227.653	1664.85	1417.84	2639492	233.852	7
WellZ	35	15985	328.02	1760.25	919.115	12541138	784.557	4
WellZ	1	13760	274.026	179.171	786.639	11227287	815.937	0
WellZ	2	11363	196.781	409.768	236.954	1366215	120.234	0
WellZ	3	9567	208.077	611.512	1441.7	1167427	122.026	0
WellZ	4	10535	288.245	764.756	1702.56	7291352	692.107	1
WellZ	5	9673	249.876	859.718	754.68	1879776	194.332	0
WellZ	6	16253	294.936	879.947	423.847	13521882	831.962	3
WellZ	7	8880	245.909	866.633	1814.87	1412493	159.065	0
WellZ	8	12712	223.826	1040.64	945.636	3645909	286.808	1
WellZ	9	11119	260.335	1100.1	807.611	1590651	143.057	4
WellZ	10	9925	270.394	1151.94	698.748	1343553	135.371	5
WellZ	11	13427	266.306	1241.22	1040.08	14895666	1109.38	2
WellZ	1	8572	189.969	58.8167	287.186	4019970	468.965	3
WellZ	3	8611	259.118	39.3108	1795.51	4768692	553.791	0
WellZ	4	7898	190.348	95.2573	1998.83	933870	118.241	2
WellZ	5	10521	267.89	201.144	1742.03	6687324	635.617	1
WellZ	6	13161	207.08	236.887	395.446	6061846	460.592	0
WellZ	7	12027	195.703	308.532	563.85	1571734	130.684	5
WellZ	8	12327	242.353	594.07	458.683	8240087	668.458	4
WellZ	9	21920	293.329	794.735	1160.25	10922397	498.285	2
WellZ	10	12757	257.201	806.881	1998.89	7222177	566.134	0
WellZ	11	13931	287.542	899.15	1300.24	8271118	593.72	0
WellZ	12	8800	267.855	935.844	1102.8	1367138	155.357	0
WellZ	13	13685	308.318	999.309	1209.63	8337902	609.273	2
WellZ	14	21879	306.133	1165.35	975.129	20039078	915.905	2
WellZ	15	16845	251.504	1285.32	1973.45	2566119	152.337	2
WellZ	16	10503	241.187	1452.95	1915.06	6528849	621.618	1
WellZ	17	5751	246.188	1501	2016.96	3395010	590.334	1
WellZ	2	13706	199.034	183.256	1303.32	6140074	447.984	3
WellZ	4	10933	242.371	491.472	1980.74	5256031	480.749	0
WellZ	5	7804	249.681	632.289	2004.48	3922675	502.649	3
WellZ	6	13401	224.344	765.934	1743.53	6856590	511.648	3
WellZ	8	12780	280.138	894.117	452.19	9212113	720.823	2
WellZ	9	10226	207.202	1052.37	1720.51	3666352	358.532	4
WellZ	10	13310	314.91	1105.84	401.613	7233832	543.489	5
WellZ	11	13961	325.52	1136.25	545.441	9117390	653.061	4
WellZ	12	10947	226.011	1165.84	184.512	1413720	129.142	2
WellZ	13	10381	218.503	1188.59	71.9166	1623115	156.354	2
WellZ	14	9723	260.604	1217.44	332.866	1336201	137.427	4
WellZ	15	10652	267.411	1241.26	490.839	1833228	172.102	1
WellZ	17	10857	229.523	1291.83	214.675	1422803	131.049	1
WellZ	18	12082	204.481	1367.03	91.1244	2038074	168.687	5
WellZ	19	13025	239.468	1496.73	60.309	4414087	338.893	1
WellZ	20	17216	330.639	1535.77	644.419	9541635	554.231	0
WellZ	21	8021	265.313	1610	2013.31	5413532	674.92	1
WellZ	22	14548	203.39	1655.37	1720.01	7645725	525.552	3
WellZ	23	11408	286.362	1811.93	1338.62	10328693	905.39	3
WellZ	2	10913	195.12	145.375	335.179	1495891	137.074	1
WellZ	3	10191	244.105	152.277	46.4856	5566781	546.245	5
WellZ	4	11209	199.763	166.955	489.506	1535704	137.006	1
WellZ	5	10164	208.11	222.836	254.142	3361905	330.766	1
WellZ	6	12208	288.567	274.496	637.242	8915961	730.338	2
WellZ	7	9782	229.952	294.829	489.643	3284411	335.761	4
WellZ	8	11344	201.669	320.292	98.9021	5228721	460.924	3
WellZ	9	12250	192.554	429.281	312.796	1627289	132.84	5
WellZ	10	9380	207.468	467.474	61.6609	2882481	307.301	2
WellZ	11	10960	190.783	519.118	443.182	1519720	138.661	0
WellZ	12	11342	232.71	621.862	532.355	1501180	132.356	2
WellZ	13	9659	208.097	623.382	107.809	3460217	358.238	0
WellZ	14	10505	238.997	655.003	698.553	1439629	137.042	0
WellZ	15	10121	252.442	742.734	442.618	1675400	165.537	0
WellZ	16	9591	268.813	773.502	550.57	3019231	314.798	0
WellZ	17	11585	231.241	789.68	329.733	8298234	716.291	0
WellZ	18	11082	216.616	863.948	170.879	6309561	569.352	3
WellZ	19	11081	255.125	936.906	389.419	8942658	807.026	3
WellZ	20	29233	243.439	1060.84	1650.43	18541477	634.265	1
WellZ	21	15154	280.622	1061.14	1338.5	13325378	879.331	1
WellZ	22	13623	210.325	1082.72	1499.67	7408674	543.836	7
WellZ	23	12299	207.021	1183.26	213.203	5786992	470.525	3
WellZ	24	13569	218.146	1197.97	1746.54	6954757	512.547	0
WellZ	25	22346	230.17	1209.46	1479.37	8420866	376.84	3
WellZ	26	10589	225.059	1318.41	1682.15	6110346	577.047	1
WellZ	27	17022	236.897	1594.49	134.588	11924266	700.521	10
WellZ	28	6218	213.441	1622.86	25.6026	3430603	551.721	4
WellZ	1	35014	240.76	423.567	1163.93	11302093	322.788	4
WellZ	2	9359	293.098	641.581	1817.7	5085682	543.4	2
WellZ	3	23259	266.077	1120.71	1931.82	10668453	458.681	0
WellZ	4	19460	234.164	1262.96	1763.99	5849148	300.573	8
WellZ	6	18582	251.789	1349.31	1905.59	2834403	152.535	1
WellZ	7	8034	262.83	1399.44	2007.98	1329957	165.541	0
WellZ	8	15244	263.227	1495.52	1788.86	9680124	635.012	5
WellZ	9	13195	210.62	1506.25	1676.96	6515781	493.807	2
WellZ	10	12581	354.822	1546.94	1962.37	9644203	766.569	0
WellZ	12	23702	320.224	1679.78	1828.85	14909423	629.036	6
WellZ	13	10245	328.552	1740.43	1970.87	5798001	565.935	0
WellZ	14	15730	299.283	1858.58	1443.53	2890344	183.747	5
WellZ	15	9841	271.103	1935.14	2008.06	4484949	455.741	9
WellZ	16	10482	257.454	1925.53	1913.58	6491773	619.326	2
WellZ	1	13651	260.332	97.742	1887.1	1580830	115.803	7
WellZ	2	14853	216.4	277.352	1980.79	5064287	340.961	2
WellZ	3	14638	263.454	419.227	1887.46	9259625	632.574	10
WellZ	4	6927	293.561	443.521	621.621	863093	124.598	2
WellZ	5	6806	298.926	500.802	542.916	865088	127.107	4
WellZ	6	8392	230.633	524.528	2006.36	3520359	419.49	0
WellZ	8	10906	223.014	883.945	1726.52	5736910	526.032	2
WellZ	9	15411	249.563	924.038	64.9939	11914576	773.122	4
WellZ	10	7963	252.781	1192.46	2008.78	5355448	672.542	0
WellZ	11	13126	267.223	1267.67	49.6264	8037362	612.324	2
WellZ	12	10644	221.559	1378.37	134.271	1572754	147.76	1
WellZ	14	13330	205.944	1489.41	279.472	1704642	127.88	4
WellZ	15	11385	271.658	1525.64	50.5936	6882004	604.48	1
WellZ	16	12678	219.906	1525.31	449.742	7259827	572.632	2
WellZ	17	16967	337.728	1560.58	807.654	19612292	1155.91	0
WellZ	18	14869	254.311	1678	195.054	6476324	435.559	4
WellZ	19	9730	217.04	1676.2	53.5194	1964660	201.918	1
WellZ	20	14757	238.429	1701.93	326.947	8168045	553.503	3
WellZ	21	11917	215.625	1781.23	453.087	6028353	505.862	1
WellZ	22	16048	237.662	1875.25	158.61	10746707	669.66	1
WellZ	23	5478	201.495	1919.97	21.6685	1895258	345.976	0
WellZ	24	17411	237.798	1946.95	368.315	10331733	593.403	4
WellZ	25	9853	197.689	1999.62	183.311	1438668	146.013	0
WellZ	1	10103	209.008	320.92	305.607	1306682	129.336	1
WellZ	2	13818	210.489	350.466	96.4424	5639099	408.098	1
WellZ	3	9706	208.697	413.116	1531.25	1902800	196.044	0
WellZ	4	9588	213.85	456.769	1417.59	1887306	196.84	0
WellZ	5	14051	194.948	489.731	263.969	6955864	495.044	5
WellZ	6	9352	217.623	478.601	1737.29	1349561	144.307	2
WellZ	7	10406	221.42	517.394	449.111	2287698	219.844	2
WellZ	8	6232	197.708	511.157	29.163	2405771	386.035	3
WellZ	9	14831	250.021	533.094	1634.51	7608970	513.045	9
WellZ	10	13866	268.874	569.729	1843.54	8518355	614.334	0
WellZ	11	10526	204.757	581.79	1474.21	1358627	129.073	2
WellZ	12	20120	253.236	676.173	60.5368	9612296	477.748	2
WellZ	13	14289	202.344	687.261	244.072	8594621	601.485	4
WellZ	14	13037	251.094	751.512	1677.09	7460892	572.286	2
WellZ	15	14448	350.564	814.82	492.411	14736933	1020	2
WellZ	16	14872	266.132	951.228	138.142	11990551	806.25	4
WellZ	17	6707	270.686	1106.18	1603.84	1372069	204.573	0
WellZ	18	7181	263.885	1125.6	1746.11	1087081	151.383	0
WellZ	19	16971	286.852	1178.19	1968.05	8172898	481.58	7
WellZ	21	8078	263.689	1221.24	1838.45	1397366	172.984	1
WellZ	22	9121	250.882	1334.99	1941.35	3531307	387.162	2
WellZ	1	12013	303.34	292.607	561.617	8691602	723.516	0
WellZ	2	8854	290.196	348.171	834.4	5787156	653.621	2
WellZ	3	9444	282.083	416.942	751.587	6908137	731.484	4
WellZ	4	13418	312.457	757.868	913.03	10041569	748.366	10
WellZ	5	10481	269.198	1241.53	45.703	5915109	564.365	2
WellZ	6	12672	243.604	1398.41	60.3243	6766901	534.004	5
WellZ	7	16052	244.157	1419.82	240.481	7848610	488.949	5
WellZ	8	15369	257.808	1614.92	281.104	9572000	622.812	5
WellZ	9	24766	271.839	1973.46	1783.04	10441536	421.608	5
WellZ	1	8556	180.132	50.0103	1775.13	1043471	121.958	0
WellZ	3	15040	257.713	201.519	1846.12	7380595	490.731	4
WellZ	4	11508	314.972	242.684	472.815	1723834	149.794	0
WellZ	5	12194	168.885	229.561	1549.6	4167427	341.76	2
WellZ	6	10917	190.682	244.213	1085.9	1285456	117.748	4
WellZ	7	15609	231.254	268.253	1347.61	8369276	536.183	11
WellZ	8	9145	247.675	275.879	2004.09	3738685	408.823	3
WellZ	9	17841	393.106	313.657	836.687	10027241	562.034	9
WellZ	10	13173	280.688	396.922	1675.22	8850584	671.873	1
WellZ	11	7925	270.071	386.115	604.865	4195238	529.368	2
WellZ	12	11065	320.714	398.761	444.903	8880172	802.546	4
WellZ	13	8787	207.922	408.626	1995.66	1146139	130.436	0
WellZ	14	8818	266.95	434.128	884.366	4405505	499.604	2
WellZ	15	8622	272.661	441.84	717.163	1350210	156.601	1
WellZ	16	10930	193.294	507.534	1479.5	1436888	131.463	1
WellZ	17	13456	283.203	513.953	1010.83	7685543	571.161	3
WellZ	18	7675	290.02	530.396	655.666	1102834	143.692	2
WellZ	19	11665	338.432	594.463	786.547	7965331	682.84	7
WellZ	20	12339	184.567	728.863	1622.39	1524491	123.551	4
WellZ	21	10958	201.55	906.865	1937.19	1347998	123.015	2
WellZ	22	12405	191.421	947.655	1755.88	5166368	416.475	2
WellZ	23	8355	277.488	970.959	404.796	1335837	159.885	3
WellZ	24	10594	196.769	1026.52	1615.98	3230940	304.978	1
WellZ	25	11693	196.235	1067.48	1966.81	1424748	121.846	1
WellZ	26	9411	264.62	1121.3	324.587	1403978	149.185	0
WellZ	27	11496	257.03	1121.27	521.862	2754250	239.583	2
WellZ	28	9812	276.958	1180.77	417.462	1973426	201.124	0
WellZ	29	11624	256.885	1233.63	575.775	1710227	147.129	3
WellZ	30	10454	265.651	1247.07	743.842	1421125	135.941	0
WellZ	31	10235	253.34	1273.13	322.425	1588675	155.22	1
WellZ	32	14167	336.389	1348.29	448.639	11372598	802.753	6
WellZ	33	11472	214.79	1383.3	1434.83	5828796	508.089	2
WellZ	34	17740	298.999	1448.78	911.484	14576685	821.685	3
WellZ	35	15986	324.946	1462.67	678.819	11764082	735.899	3
WellZ	36	15479	323.935	1594.71	721.458	11027824	712.438	6
WellZ	37	17809	263.729	1785.35	1373.64	16087111	903.314	5
WellZ	38	8030	189.111	2012.22	1465.28	989068	123.172	0
WellZ	1	7296	171.346	70.4867	44.021	884543	121.237	1
WellZ	2	14947	229.782	79.2219	274.598	7185025	480.7	8
WellZ	3	11428	180.928	124.368	121.759	1582951	138.515	1
WellZ	4	15688	212.07	161.875	1920.28	6138557	391.29	5
WellZ	5	6493	206.433	268.288	28.1609	2351570	362.17	7
WellZ	6	12427	216.773	289.284	1648.29	5238329	421.528	2
WellZ	7	15281	239.118	286.709	182.608	7863249	514.577	3
WellZ	9	9255	216.179	528.583	1161.7	1177937	127.276	0
WellZ	10	11745	191.53	605.168	1374.09	3570068	303.965	3
WellZ	11	13363	239.333	771.289	1857.08	6685629	500.309	2
WellZ	12	10442	268.99	855.105	2000.82	5172878	495.391	4
WellZ	13	20574	282.542	1151.01	295.418	11451016	556.577	5
WellZ	14	11019	262.253	1136.44	495.449	5927166	537.904	3
WellZ	15	17812	241.934	1191.88	112.742	2354708	132.198	4
WellZ	16	12324	259.227	1205.81	598.972	7001089	568.086	5
WellZ	17	13372	288.262	1260.33	245.592	8138044	608.588	4
WellZ	18	45337	305.113	1377.25	540.844	15346362	338.495	3
WellZ	19	12020	258.528	1396.97	751.899	1874666	155.962	4
WellZ	20	18152	268.805	1439.14	391.046	9932255	547.171	5
WellZ	21	6271	263.161	1442.85	2011.35	3766243	600.581	0
WellZ	22	13856	273.63	1528.44	1002.84	13608375	982.129	3
WellZ	23	11293	210.849	1508.74	1378.9	2341078	207.303	3
WellZ	24	22424	245.472	1554.6	1790.73	13101294	584.253	3
WellZ	25	10696	251.44	1609.1	658.449	1615089	150.999	4
WellZ	26	16176	280.302	1616.65	876.761	11774678	727.91	7
WellZ	27	10047	252.541	1659.11	1938.98	6401012	637.107	2
WellZ	28	21107	249.334	1684.63	483.55	17585544	833.162	9
WellZ	29	13311	269.756	1709.1	1016.44	11166812	838.916	1
WellZ	30	10787	259.032	1762.16	1252.81	8214557	761.524	1
WellZ	31	9979	274.303	1771.36	813.372	1960141	196.427	0
WellZ	32	8301	287.992	1804.36	672.408	1624820	195.738	0
WellZ	33	12360	307.01	1822.84	1477.11	7495427	606.426	7
WellZ	34	19163	274.803	1903.5	912.863	18752221	978.564	4
WellZ	35	17895	277.966	1902.83	746.403	11107778	620.72	1
WellZ	36	11987	239.828	1914.98	467.113	6959133	580.557	2
WellZ	37	13481	276.53	1934.22	1561.3	7969608	591.173	5
WellZ	38	16768	280.604	1966.37	1088.55	2333494	139.164	4
WellZ	39	22572	338.921	1982.78	1272.04	9602077	425.398	3
WellZ	40	5785	215.624	2023.94	733.249	859721	148.612	0
WellZ	1	14462	217.859	65.5895	309.649	7485190	517.576	2
WellZ	2	10808	269.752	43.3421	523.265	5239011	484.735	1
WellZ	3	12437	234.607	54.143	714.125	2010460	161.652	3
WellZ	4	11282	258.192	57.3847	930.095	1585320	140.518	4
WellZ	7	7654	173.277	60.0451	41.9949	913346	119.329	0
WellZ	8	16649	252.791	135.643	790.886	2239741	134.527	3
WellZ	9	11759	314.389	164.215	563.359	4703872	400.023	3
WellZ	10	11568	179.516	189.046	52.9725	1560149	134.868	1
WellZ	11	11224	196.539	209.92	159.019	1525388	135.904	0
WellZ	12	9939	228.295	240.687	703.199	1360411	136.876	2
WellZ	13	18709	239.464	273.027	852.086	2524763	134.949	1
WellZ	14	17244	244.087	273.72	265.805	8939747	518.427	3
WellZ	15	9525	214.673	356.539	111.201	1432108	150.353	0
WellZ	16	13082	247.016	484.873	93.7416	5660493	432.693	1
WellZ	17	5270	180.031	496.186	2027.36	1566426	297.235	0
WellZ	18	9380	222.01	489.608	705.709	1245963	132.832	3
WellZ	19	13686	189.194	533.531	1669.17	1826659	133.469	6
WellZ	20	20685	226.063	704.558	1878.96	6276270	303.421	1
WellZ	21	14561	222.989	821.446	1773.5	7906061	542.961	2
WellZ	22	8906	216.575	876.4	2011.39	2234943	250.948	0
WellZ	23	21208	220.322	932.313	1595.12	2900790	136.778	0
WellZ	24	9046	244.599	986.058	1735.46	2924018	323.239	1
WellZ	25	14503	214.524	1030.03	1884.83	7555385	520.953	0
WellZ	26	14474	255.754	1136.38	32.5179	6006823	415.008	3
WellZ	27	11294	219.863	1085.18	1496.05	1731222	153.287	1
WellZ	28	13051	215.345	1101.08	1661.23	7208808	552.357	1
WellZ	29	13946	309.186	1145.7	1367.79	9053687	649.196	3
WellZ	31	16918	269.448	1240.85	1521.91	9350416	552.69	12
WellZ	32	10411	227.586	1231.42	1801.09	1634348	156.983	0
WellZ	33	12129	214.611	1296.15	1973.5	1584171	130.61	1
WellZ	34	10896	226.469	1348.44	148.2	1522390	139.72	0
WellZ	35	23020	306.868	1402.21	1764.64	15500253	673.339	3
WellZ	36	13126	208.946	1433.07	1587.79	3666317	279.317	0
WellZ	37	17492	285.471	1462.95	323.742	2251152	128.696	1
WellZ	38	8867	288.318	1533.81	1050.93	2342513	264.183	0
WellZ	39	8637	309.475	1555.39	852.457	1216620	140.861	0
WellZ	40	10413	242.655	1587.06	1900.42	1516372	145.623	5
WellZ	41	10922	233.102	1866.55	1314.22	1409783	129.077	1
WellZ	42	12122	333.941	1923.85	1614.91	7723054	637.111	3
WellZ	43	11145	332.351	1922.91	1503.67	6742014	604.936	3
WellZ	1	11793	238.465	50.8891	956.284	5931481	502.966	7
WellZ	2	10391	262.811	114.098	475.754	6148700	591.733	1
WellZ	3	13072	340.921	404.398	925.145	7679481	587.476	0
WellZ	4	5127	222.669	860.936	22.1964	2243552	437.595	0
WellZ	5	13101	269.451	1011.21	1494.11	8341899	636.738	0
WellZ	6	15388	321.728	1066.84	674.71	9339456	606.931	11
WellZ	7	40150	250.148	1307.13	1886.1	16110720	401.263	3
WellZ	8	13217	370.654	1215.53	645.849	11153375	843.866	6
WellZ	9	12204	393.511	1360.25	809.212	11213786	918.862	9
WellZ	11	10506	216.576	1569.05	1910.35	1440157	137.079	2
WellZ	12	12285	260.369	1702.98	558.593	9122699	742.588	3
WellZ	14	11725	202.204	1893.33	1965.57	1380478	117.738	1
WellZ	15	10776	222.769	1993.3	616.348	1627471	151.027	0
WellZ	16	8127	205.781	2009.15	1791.55	976726	120.183	3
WellZ	1	11725	253.002	54.5767	1764.36	5358526	457.017	2
WellZ	2	7738	231.368	1120.07	2020.42	4393125	567.734	5
WellZ	3	14836	256.649	1363.57	218.599	13560806	914.047	2
WellZ	4	14944	215.674	1699.75	274.281	9141550	611.72	3
WellZ	5	5222	163.77	1711.19	49.0218	620997	118.919	4
WellZ	6	7915	170.748	1807.7	44.7015	945918	119.51	5
WellZ	7	9198	261.437	1807.79	1026.72	1266098	137.649	1
WellZ	8	26803	245.041	1851.21	355.579	17264670	644.132	4
WellZ	9	14148	227.35	1992.72	235.537	6095057	430.807	2
WellZ	10	12609	241.535	1994.96	384.651	7152932	567.288	3
WellZ	11	7930	241.889	2001	526.609	1139216	143.659	1
WellZ	1	5258	173.019	53.3838	40.047	634552	120.683	0
WellZ	2	5331	233.995	24.5496	274.588	1453309	272.615	2
WellZ	3	8680	179.489	492.991	31.256	2872864	330.975	1
WellZ	4	8712	293.502	732.154	868.933	1224310	140.531	0
WellZ	6	15569	250.699	889.839	1101.59	10658533	684.6	3
WellZ	8	5875	256.075	1144.12	25.7854	3557771	605.578	0
WellZ	9	15059	277.703	1489.01	177.846	9096840	604.08	2
WellZ	10	14781	322.309	1571.92	1156.53	8070608	546.012	5
WellZ	11	14535	354.418	1610.45	709.668	10909273	750.552	3
WellZ	12	23836	278.714	1641.67	951.185	9512390	399.077	5
WellZ	13	11324	223.972	1669.79	1837.84	1465172	129.386	2
WellZ	14	22099	385.211	1756.25	772.027	13772795	623.232	6
WellZ	15	13588	253.438	1754.44	1118.29	7812305	574.941	1
WellZ	16	10382	292.892	1763.46	933.316	1958592	188.653	3
WellZ	17	13022	239.424	1830.07	556.591	8998658	691.035	1
WellZ	18	17111	468.997	1825.91	1490.9	8700649	508.483	1
WellZ	19	13149	341.123	1853.06	1797.39	2858868	217.421	0
WellZ	20	17921	291.453	1867.51	1060.15	9362993	522.459	5
WellZ	21	12656	376.316	1877.29	885.704	6550597	517.588	8
WellZ	22	12749	212.846	1982.5	1333.03	1900066	149.036	0
WellZ	23	11782	246.783	1987.41	588.3	7777696	660.134	3
WellZ	24	9355	287.807	2003.11	241.933	5433546	580.817	4
WellZ	25	5277	215.901	2024.98	739.658	2898846	549.336	1

## Sheet: 53BP1_ZD_Rep2
ParentWell	CellIndx	NuclearArea	MeanNuclearIntensity	Centroid_1	Centroid_2	IntNuclearIntensity	pRBIntensity	NumPuncta
								0
E03	1	6574	4160.18	49.9594	411.313	2263216	344.268	0
E03	2	8989	3771.68	173.924	399.758	1907692	212.225	1
E03	3	20450	5585.92	310.454	305.074	23219989	1135.45	11
E03	6	8902	3486.21	779.395	53.3932	1428532	160.473	3
E03	7	9573	4167.93	866.033	281.844	1759596	183.808	3
E03	8	9179	4701.89	933.172	407.552	1438551	156.722	0
E03	9	7748	6207.09	941.288	43.2716	15943417	2057.75	1
E03	10	10172	5159.46	962.455	210.761	13020991	1280.08	0
E03	11	10055	4742.31	1087.12	444.285	2006047	199.507	4
E03	14	10257	6384.83	1657.5	982.177	13970059	1362	3
E03	16	10659	4714.83	1686.09	1132.06	5880656	551.708	1
E03	18	13182	5917.76	1726.18	875.841	16592259	1258.71	5
E03	19	10098	4263.46	1734.31	453.076	2457515	243.367	3
E03	20	10825	4420.88	1752.15	1791.94	2937232	271.338	2
E03	21	9498	5792.57	1757.38	1985.85	8753583	921.624	3
E03	22	9302	3493.54	1782.36	145.375	1980568	212.919	0
E03	23	13994	3597.57	1838.63	1260.03	2004756	143.258	1
E03	25	11649	4385.35	1832.94	1521.67	6164028	529.147	2
E03	26	10650	4117.36	1850.5	1887.64	4525348	424.915	0
E03	27	9136	4917.73	1845.13	1688.57	3184416	348.557	2
E03	28	17984	5268.56	1884.65	685.499	2563407	142.538	0
E03	30	18508	5341.93	1940.13	1164.38	3135739	169.426	10
E03	31	11837	3656.98	1947.43	431.72	2184870	184.58	1
E03	32	9551	4551.76	1995.25	619.885	1854538	194.172	2
E03	33	6911	5606.32	2018.54	1396.46	8542367	1236.05	0
E03	2	12846	2818.67	125.687	570.51	5562800	433.038	1
E03	3	13666	3609.26	121.278	671.186	9076035	664.133	1
E03	4	15779	4676.07	246.446	1841.6	2157437	136.728	2
E03	5	13602	4259.11	355.077	586.238	9865589	725.304	4
E03	6	9417	3851.11	346.03	685.552	1801233	191.275	0
E03	9	11348	3510.75	541.061	622.574	5654745	498.303	0
E03	10	9869	3684.14	596.838	1396.25	1220034	123.623	0
E03	11	9688	4162.06	603.639	1225.96	2569149	265.189	1
E03	12	11310	3620.88	788.305	590.066	1509999	133.51	1
E03	13	11498	4369.5	1013.4	655.412	1813171	157.694	1
E03	14	10558	4831.99	1063	528.663	1930919	182.887	4
E03	15	10990	4921.53	1160.7	630.821	1708418	155.452	1
E03	16	11501	4516.76	1202.53	477.493	1843839	160.32	4
E03	17	10267	4685.67	1195.64	951.149	1542025	150.192	1
E03	19	8733	4787.12	1270.64	1920.06	1255069	143.716	1
E03	20	10509	5203.02	1282.97	635.438	2577486	245.265	2
E03	21	9255	4950.82	1285.33	1140.49	1282831	138.61	2
E03	22	10062	5509.18	1360.25	549.832	2394238	237.949	1
E03	23	9555	5902.09	1395.02	661.155	2099849	219.764	3
E03	24	14538	6762.54	1421.83	448.343	15893127	1093.21	7
E03	25	9696	5565.06	1450.95	963.054	2193891	226.268	2
E03	26	17145	6313.18	1502.33	827.729	6691650	390.297	1
E03	27	9638	5531.63	1535.34	697.647	2408785	249.926	1
E03	29	9431	5235.67	1842.72	1584.12	1322057	140.182	0
E03	1	9346	4390.95	56.3061	902.788	6634935	709.922	5
E03	3	8226	4226.33	49.4447	804.517	4205499	511.245	5
E03	4	10725	6089.79	76.055	1695.23	1392376	129.825	4
E03	5	10204	4488.41	130.24	1095.56	7816719	766.045	2
E03	6	8945	3381.85	140.339	270.963	1609148	179.894	2
E03	7	10131	5191.42	156.029	1002.47	7632278	753.359	1
E03	8	13538	6049.3	243.56	843.28	11269735	832.452	1
E03	9	8850	4652.77	249.323	987.523	1902621	214.985	0
E03	10	9299	4622.88	268.35	1126.98	1718619	184.818	0
E03	11	8825	4166.86	311.09	2002.98	7714061	874.115	4
E03	12	11155	2905.71	316.572	193.739	1737922	155.798	1
E03	13	17040	4460.57	352.727	491.421	8293062	486.682	1
E03	14	8427	4954.27	356.046	1032.48	1452749	172.392	2
E03	15	10279	6072	371.222	1284.44	10299689	1002.01	2
E03	16	10306	6243.96	387.89	1170.14	10218249	991.485	0
E03	17	9950	4957.19	443.366	983.492	1627992	163.617	3
E03	18	12642	3360.43	470.609	646.859	2055204	162.57	0
E03	19	12411	3784.21	497.525	859.269	2482425	200.018	0
E03	20	11990	4370.66	498.374	197.555	8544495	712.635	4
E03	21	11227	3683.45	501.206	468.202	6498732	578.848	0
E03	22	9501	4755.92	518.391	1256.38	1663668	175.105	0
E03	23	8975	4982.53	555.015	1136.52	1396966	155.651	1
E03	24	9377	3963.29	562.686	1564.33	1231216	131.302	0
E03	25	9717	4918.45	569.785	1012.88	1375114	141.516	0
E03	26	14100	4051.56	604.868	297.238	9582390	679.602	2
E03	27	11021	4217.21	662.147	1327.5	1562406	141.766	1
E03	28	10671	3515.61	662.844	647.087	1402895	131.468	0
E03	29	11401	4052.34	664.503	947.772	1663724	145.928	0
E03	30	10755	3742.12	716.721	328.232	1903565	176.993	1
E03	31	9329	5391.35	734.223	1215.7	1528249	163.817	2
E03	33	12428	7127.45	884.272	1073.5	10898660	876.944	2
E03	34	8590	5403.86	891.19	1251.05	1348985	157.041	1
E03	35	12889	4208.71	935.286	954.693	2204366	171.027	0
E03	36	9489	5778.63	956.061	1168.19	1760664	185.548	0
E03	37	10191	4559.82	952.296	793.892	1944643	190.82	0
E03	38	9556	3629.38	997.088	1819.89	1285438	134.516	2
E03	39	11248	4812.49	1020.93	611.56	1705861	151.659	3
E03	40	11842	3569.39	1048.91	1554.02	6527598	551.224	2
E03	41	13411	4073.65	1079.94	1271.68	2128102	158.683	7
E03	42	10355	3979.55	1083.91	230.376	1482230	143.141	2
E03	43	18452	6088.15	1164.47	831.542	3237218	175.44	2
E03	44	13882	4752.25	1164.99	79.7096	1778414	128.109	1
E03	45	11414	4020.61	1211.99	1329.1	2213946	193.968	4
E03	46	12455	4087.93	1248.39	1063.19	1869586	150.107	4
E03	47	10458	3875.37	1251.55	304.799	1412374	135.052	1
E03	48	8680	4670.69	1240.94	1723.67	5811376	669.513	1
E03	49	10211	3800.79	1281.18	1977.11	1474940	144.446	0
E03	50	16508	5351.93	1375.83	1168.78	12641645	765.789	6
E03	51	11349	5287.56	1468.11	694.518	11117777	979.626	3
E03	52	15295	6277.78	1498.82	913.646	11172770	730.485	5
E03	53	13594	4151.13	1503.2	399.922	11481507	844.601	1
E03	54	10353	4937.83	1613.92	517.269	2070904	200.029	1
E03	56	13085	4464.6	1691.48	1004.75	2416597	184.685	4
E03	57	9509	3601.99	1681.41	152.56	1223076	128.623	0
E03	58	10996	4445.22	1685.66	280.69	1749417	159.096	1
E03	59	10452	5084.34	1763.93	449.688	1795837	171.818	0
E03	60	18053	5736.33	1793.77	843.164	10536826	583.661	9
E03	61	19093	4270.37	1830.24	285.544	2805437	146.935	1
E03	62	9327	5431.79	1871.3	994.073	1678119	179.921	0
E03	63	11628	4327.14	1918.69	652.056	2160873	185.834	0
E03	64	12538	5302.93	1973.89	464.234	12183937	971.761	3
E03	65	8543	5735.09	1997.33	958.455	1519448	177.859	0
E03	66	8178	6680.77	2007.74	796.981	10345326	1265.02	3
E03	1	12912	4387.15	176.468	128.852	11904421	921.966	9
E03	2	9425	3374.36	304.513	153.158	1892377	200.783	1
E03	4	10493	4209.49	396.115	1981.02	9586150	913.576	3
E03	5	8172	5208.08	442.557	1088.17	1189544	145.563	1
E03	6	13107	5129.76	455.81	1602.99	12015305	916.709	10
E03	7	7958	3929.68	450.06	293.743	1018676	128.007	3
E03	8	9791	3663.85	535.16	1867.19	1589971	162.391	0
E03	10	8264	4180.66	614.189	1980.71	1456560	176.254	0
E03	11	8489	4169.42	657.67	497.512	1232884	145.233	1
E03	12	12351	3933.96	1004.4	475.184	1821550	147.482	4
E03	13	14351	5116.77	1316.82	1914.06	1918063	133.654	7
E03	15	9010	3836.2	1378.97	154.052	1199072	133.082	2
E03	16	9706	4487.41	1408.28	343.737	1359342	140.052	2
E03	17	8615	5687.78	1415.28	804.23	1143396	132.722	0
E03	19	10060	5561.35	1617.11	756.755	2435222	242.07	0
E03	20	7623	6169.83	1727.09	720.412	1913234	250.982	5
E03	21	11075	6845.61	1771.1	824.227	15060750	1359.89	6
E03	22	8920	5725.69	1874.48	763.573	1655441	185.588	3
E03	23	9235	5709.8	1905.39	900.493	1832772	198.459	1
E03	2	11116	3131.92	84.1039	998.993	1644263	147.919	1
E03	3	9512	3379.54	94.0325	584.599	1362372	143.227	5
E03	4	8528	3449.6	193.968	356.026	1574365	184.611	0
E03	5	10902	6143.21	198.681	1245.28	2615074	239.871	4
E03	6	9609	3603.23	255.163	515.872	3098877	322.497	2
E03	7	20927	2792.77	284.313	173.629	16968469	810.841	0
E03	8	16385	4234.37	306.165	744.272	18553936	1132.37	5
E03	9	10161	3238.45	297.181	1086.07	1403351	138.112	2
E03	10	9294	3528.74	355.89	366.938	1403100	150.968	0
E03	11	8592	3908.98	360.097	457.774	1326732	154.415	1
E03	13	12598	5669.62	436.816	1189.5	11421732	906.631	2
E03	14	12915	5201.53	530.493	1027.48	13056728	1010.97	4
E03	15	13970	5063.33	676.642	923.256	15669270	1121.64	2
E03	16	14625	5100.35	715.918	698.537	15901128	1087.26	7
E03	17	16166	5781.85	888.928	584.097	3708896	229.426	11
E03	18	16133	6075.24	964.211	839.666	8908825	552.211	5
E03	19	9726	5552.96	1009.78	452.949	12731164	1308.98	0
E03	20	12696	5415.82	1070.35	563.038	16015261	1261.44	4
E03	21	10370	4962.84	1072.18	930.106	1884393	181.716	4
E03	22	10211	5546.69	1085.72	687.676	2850412	279.151	2
E03	23	11481	4791	1126.04	804.728	2426639	211.361	0
E03	24	11058	5039.4	1203.93	379.403	12863302	1163.26	5
E03	26	10514	5042.59	1260.49	915.598	1808471	172.006	0
E03	27	12681	4908.83	1324.78	209.32	13306510	1049.33	1
E03	28	10276	4946.34	1331.03	1039.68	8086519	786.933	0
E03	29	11511	4566.7	1331.55	577.821	2858543	248.331	2
E03	30	10475	4751.94	1337.08	349.972	2762877	263.759	0
E03	31	8946	5470.79	1387.87	445.334	5963878	666.653	1
E03	32	11654	4473.57	1507.33	221.839	14206683	1219.04	2
E03	33	6303	4036.09	1507.51	33.5642	1162932	184.505	0
E03	34	9708	4654.17	1549.12	1200.43	1543669	159.01	4
E03	35	9041	3568.16	1763.75	55.3268	5383631	595.469	1
E03	36	9414	4916.68	1777.47	1588.65	2033408	215.998	4
E03	38	10021	5373.27	1899.39	850.293	1626782	162.337	2
E03	39	8879	4780.1	1921.33	1984.9	1628935	183.459	1
E03	40	11986	5600.96	1941.03	1857.51	11648657	971.855	9
E03	41	9662	4526.98	1935.65	1687.91	1591380	164.705	3
E03	42	8153	5048.82	2009.77	724.915	1326103	162.652	0
E03	43	10543	4228.67	2003.6	1542.35	1389666	131.809	0
E03	44	8696	4302.17	2012.79	996.062	1775788	204.207	0
E03	45	6111	4534.83	2024.07	1844.95	1171019	191.625	2
E03	46	5342	3607.73	2028.81	1254.29	714849	133.817	1
E03	1	12706	4622.55	202.879	463.917	9950763	783.155	5
E03	2	8718	5621.57	262.021	1683.99	8713496	999.483	5
E03	3	9543	4874.26	297.898	1790.11	8091710	847.921	5
E03	5	14729	4571.4	374.759	699.718	11952586	811.5	6
E03	6	11379	6236.4	364.818	1680.7	12135558	1066.49	4
E03	7	16288	4699.34	397.824	961.447	2600802	159.676	4
E03	8	13407	2968.85	426.634	514.651	2155367	160.764	3
E03	9	8576	5077.39	481.438	1695.38	8631311	1006.45	2
E03	10	16846	4297.16	579.604	782.272	14037813	833.302	5
E03	11	12648	6037.87	617.666	1011.88	11362469	898.361	10
E03	12	13611	5019.71	623.181	481.253	14051953	1032.4	1
E03	13	13179	3474.54	684.983	649.011	2709801	205.615	0
E03	14	10174	4355.04	674.456	279.007	12366900	1215.54	0
E03	15	15368	6026.19	781.472	466.186	22147866	1441.17	13
E03	16	11360	4460.55	827.942	267.981	14675306	1291.84	1
E03	17	11226	3775.96	825.08	1188.79	1596414	142.207	2
E03	18	18182	5217.01	894.052	670.162	16932108	931.257	11
E03	19	8969	5098.86	872.07	375.602	4701871	524.236	2
E03	20	12833	3576.64	936.498	905.067	1797850	140.096	3
E03	21	11433	3682.42	948.82	1181.3	1513437	132.374	1
E03	22	10455	5476.56	946.035	530.782	11454757	1095.62	0
E03	23	11735	3661.07	956.93	1387.07	6168838	525.679	1
E03	24	9790	3632.88	986.948	1839.87	1277255	130.465	1
E03	25	14260	6040.98	1030.5	393.376	6402201	448.962	5
E03	26	12964	3217.29	1088.3	1581.59	2266215	174.808	1
E03	27	10113	3867.58	1094.08	1935.2	1851243	183.056	1
E03	28	11108	4442.3	1152.65	556.757	2017709	181.645	3
E03	30	15608	4834.49	1203.59	1310.6	15322893	981.733	5
E03	31	8693	4130.45	1199.09	1846.93	1225528	140.979	1
E03	32	15394	5157.31	1257.52	1481.39	14009371	910.054	11
E03	33	16178	5934.49	1264.28	894.238	17600950	1087.96	6
E03	34	14007	4068.68	1278.67	763.485	2923189	208.695	0
E03	35	11415	4589.68	1273.93	1081.81	1926747	168.791	2
E03	36	13824	4696.88	1335.47	512.484	15698368	1135.59	2
E03	37	9967	5204.28	1328.23	1241.85	1819365	182.539	1
E03	38	17833	5011.28	1347.91	1630.43	18574177	1041.56	5
E03	40	10663	3845	1404.5	1906.14	1816260	170.333	1
E03	41	10687	5145.04	1426.71	631.86	1958428	183.253	4
E03	42	17678	6250.57	1454.87	1229.6	2891035	163.539	2
E03	44	10341	5087.26	1484.91	713.271	1539501	148.874	5
E03	45	16639	6197.1	1511.25	1409.39	2830980	170.141	4
E03	46	8452	6515.31	1524.84	987.035	1348683	159.57	0
E03	47	8644	6593.91	1539.45	863.221	1470771	170.149	2
E03	48	14997	5538.33	1561.51	1818.27	16789268	1119.51	15
E03	49	10434	4811.23	1548.68	1606	2519248	241.446	0
E03	50	11438	3789.15	1602.58	420.34	2197448	192.118	2
E03	51	14374	3955.35	1609.6	1980.28	12662429	880.926	2
E03	52	9319	5578.78	1599	1175.06	1446920	155.266	1
E03	53	9631	5779.99	1621.95	953.778	1816023	188.56	0
E03	54	12096	4919.22	1647.66	1659.56	12755361	1054.51	2
E03	55	12577	4567.75	1660.18	708.053	2022807	160.834	1
E03	56	26225	6315.33	1728.7	1333.56	5243265	199.934	2
E03	57	17551	5444.26	1721.31	1498.05	3002005	171.045	3
E03	58	10165	5478.85	1690.49	859.358	1711682	168.39	0
E03	59	14468	4807.27	1747.07	1019.97	15086595	1042.76	3
E03	60	14629	3902.9	1753.11	1907	11048696	755.26	2
E03	61	10274	3489.78	1768	213.617	1602647	155.991	1
E03	62	7866	4450.31	1791.54	61.7684	5992911	761.875	6
E03	63	18955	5762.67	1873.86	715.663	3703308	195.374	1
E03	64	9674	5515.04	1822.92	1158.99	1688692	174.56	2
E03	65	14993	6146.8	1872.89	500.669	2873870	191.681	6
E03	66	20142	5630.19	1895.25	875.449	3362801	166.955	2
E03	67	16732	4027.41	1900.18	74.3379	7097164	424.167	0
E03	68	15726	4840.73	1943.09	333.172	15512883	986.448	11
E03	69	9080	5521.11	1960.85	574.094	6798350	748.717	2
E03	70	8900	4413.75	2006.9	1984.76	7650328	859.587	4
E03	71	8268	5639.85	2005.37	968.123	1589597	192.259	0
E03	72	5676	5876.91	2024.89	698.249	4690961	826.455	0
E03	1	12023	3617.16	49.4805	517.595	9528538	792.526	2
E03	2	6834	4449.84	31.1018	781.387	5858333	857.233	6
E03	4	8917	4159.64	74.3874	906.623	1644936	184.472	0
E03	5	8132	4432.55	159.443	836.303	1907795	234.603	0
E03	6	13143	5425.4	199.586	696.225	14250131	1084.24	11
E03	7	13280	5507.87	271.829	799.809	16779501	1263.52	6
E03	8	6001	3428.81	359.787	26.2336	736645	122.754	2
E03	9	13203	3323.79	409.063	472.949	10975111	831.259	4
E03	10	12806	4752.66	468.821	1953.69	6611162	516.255	5
E03	11	13464	3399.11	477.296	207.849	12249288	909.781	2
E03	13	12195	5029.44	1202.11	55.8401	10462818	857.96	2
E03	15	7681	3105.67	1402.77	44.8003	4536005	590.549	0
E03	16	6927	4582.49	1406.43	2008.76	7051163	1017.92	3
E03	17	14407	6613.66	1562.02	1092.59	2596627	180.234	5
E03	18	12607	4944.24	1574.3	358.477	15295780	1213.28	6
E03	19	10544	5320.09	1581.48	615.942	4941221	468.629	3
E03	20	16693	4753.75	1603.96	1825.21	2465935	147.723	10
E03	23	14485	4236.13	1658.13	159.847	14611078	1008.7	7
E03	24	9262	4254.76	1650.2	1978.09	1299197	140.272	4
E03	25	10677	4785.86	1702.07	743.802	1939372	181.64	1
E03	26	13100	5286.66	1761.07	526.851	17569377	1341.17	4
E03	28	9239	4352.6	1804.06	1494.58	4536516	491.018	2
E03	29	14394	3594.68	1836.29	167.175	14651930	1017.92	6
E03	30	13283	5403.92	1879.88	1984.47	13455353	1012.98	5
E03	31	10105	5521.57	1875.66	883.517	1824024	180.507	4
E03	32	10253	4514.63	1882.42	534.492	2214422	215.978	2
E03	33	9768	3855.79	1969.62	358.328	1400593	143.386	3
E03	34	20613	4242.88	1980.11	213.858	12225205	593.082	5
E03	35	10185	4916.17	1971.15	732.126	1984937	194.888	2
E03	1	8872	3768.51	183.866	345.38	2323475	261.889	1
E03	2	8400	4094.19	235.034	1924.39	3050344	363.136	0
E03	3	10243	2913.14	369.073	94.8519	1333545	130.191	2
E03	4	7308	4481.77	533.271	263.783	1471042	201.292	1
E03	6	8791	6104.89	671.98	1426.78	9546030	1085.89	1
E03	7	13986	6613.3	1031.14	975.32	22094518	1579.76	7
E03	9	8364	4736.5	1225	1689.91	1239065	148.143	1
E03	10	10642	4085.17	1264.52	57.2878	10349059	972.473	4
E03	11	8197	4997.52	1266.56	1829.64	5739329	700.174	0
E03	12	10699	4355.87	1376.34	1761.74	3005104	280.877	0
E03	13	7393	4513.98	1415.48	36.8454	9245723	1250.61	2
E03	14	12200	5456.97	1435.13	151.482	17333851	1420.81	4
E03	16	15210	5318.5	1531.77	1757.9	15225406	1001.01	5
E03	17	11021	4836.69	1519.14	359.67	3591196	325.85	2
E03	18	11373	3989.17	1555.72	1570.46	1802116	158.456	2
E03	19	9712	5462.45	1575.24	536.607	2007918	206.746	1
E03	20	8982	5256.53	1614.72	1443.32	1659400	184.747	1
E03	21	24515	7008.4	1690.4	365.808	35276031	1438.96	5
E03	22	13966	5435.03	1653	191.757	23036709	1649.49	4
E03	23	10474	5211.54	1682.12	744.295	1702670	162.562	0
E03	24	10251	5439.35	1686.23	565.571	2354050	229.641	1
E03	25	9926	5187.23	1694.93	1355.48	6377105	642.465	2
E03	26	13810	4774.35	1753.43	1693.9	14506385	1050.43	8
E03	27	13701	5040.84	1761.85	1518.56	16315552	1190.83	6
E03	28	13322	4085.28	1763.54	1186.82	7910293	593.777	1
E03	29	9039	5919.26	1781.51	749.309	2149206	237.77	1
E03	30	7413	3270.78	1783.53	42.7724	1365042	184.142	2
E03	31	16312	6788.96	1793.24	967.027	20647159	1265.77	1
E03	32	14760	6030.95	1837.43	561.073	19584317	1326.85	2
E03	33	11797	4012.35	1862.95	324.617	11417162	967.802	5
E03	34	10639	4113.85	1868.34	1818.04	1592552	149.69	1
E03	35	11292	4818.7	1874.07	1562.54	10838582	959.846	2
E03	37	11663	5243.5	1886.3	784.469	13016642	1116.06	1
E03	38	11128	4610.81	1892.18	1173.95	2311643	207.732	0
E03	39	9577	5433.66	1907.42	989.711	1931214	201.651	1
E03	40	15709	5978.98	1947.15	1369.64	18696697	1190.19	2
E03	41	12773	3599.75	1990.86	504.455	2309696	180.826	5
E03	42	8545	4971.31	1978.78	1740.45	1435022	167.937	3
E03	43	5759	6718.39	1994.49	1996.48	7875389	1367.49	2
E03	44	8838	4563.58	2012.58	911.463	2915241	329.853	0
E03	45	5249	4215.34	2026.99	773.301	1040713	198.269	0
E03	1	12867	2597.78	108.576	924.109	1658015	128.858	3
E03	2	9853	3493.53	180.387	1052.29	1750976	177.71	1
E03	3	9517	3809.2	255.607	840.236	3362347	353.299	4
E03	4	8774	4181.88	295.1	1211.18	1452794	165.579	4
E03	5	10323	5544.6	327.752	106.014	1581981	153.248	1
E03	6	14565	4949.49	335.034	967.849	11826784	812	5
E03	7	12806	5572.26	371.915	1498.13	13831416	1080.07	8
E03	9	10725	4412.07	516.989	945.811	11498771	1072.15	2
E03	10	26524	4193.17	766.824	1914.54	15499711	584.366	1
E03	11	9387	3643.94	859.176	1652.65	1237545	131.836	2
E03	12	9414	3866.96	888.534	1987.97	1637076	173.898	1
E03	14	8326	5747.88	1068.59	946.046	9232485	1108.87	3
E03	15	12647	6520.4	1104.94	312.696	14535657	1149.34	6
E03	18	10199	5796.41	1196.64	528.19	12325413	1208.49	3
E03	20	15653	6595.23	1295.53	705.704	2989770	191.003	14
E03	21	12397	6313.25	1323.83	309.046	15047685	1213.82	6
E03	22	14686	6466.86	1318.41	433.634	19388552	1320.21	5
E03	24	5494	5236.67	1411.5	2019.08	911628	165.932	1
E03	25	14127	7207.76	1436.76	993.396	17803582	1260.25	4
E03	26	13277	6436.36	1489.36	166.188	27056508	2037.85	6
E03	27	11032	5067.16	1485.73	604.813	2245411	203.536	5
E03	28	13908	6647.84	1501.72	425.692	15383130	1106.06	4
E03	29	10455	4566.37	1498.58	1871.64	1756697	168.025	3
E03	30	12598	6586.58	1523.62	303.339	18377049	1458.73	2
E03	31	6923	5186.6	1535.18	2013.67	1323051	191.109	0
E03	32	8681	3788.02	1640.92	47.418	1687867	194.432	1
E03	33	12210	6227.36	1653.39	1948.57	19292432	1580.05	4
E03	34	14400	5889.94	1666.06	425.102	15926467	1106	5
E03	35	10650	6038.36	1668.48	207.905	14534428	1364.74	5
E03	36	10980	4711.53	1689.01	544.261	2459540	224.002	1
E03	38	11417	5090.33	1772.26	145.513	13560820	1187.77	5
E03	39	11860	5244.57	1786.74	343.857	14520566	1224.33	6
E03	40	12010	6033.52	1906.83	444.443	17805530	1482.56	2
E03	41	11483	3399.29	1939.68	189.907	2196811	191.31	2
E03	42	6720	6258.79	2014.56	442.199	9117508	1356.77	0
E03	43	5528	5557.32	2020.24	251.853	1102688	199.473	1
E03	2	5795	2835.71	31.9381	1893.5	747100	128.921	1
E03	3	12138	2503.12	130.307	317.415	1594255	131.344	1
E03	4	14473	4523.54	185.334	1643.51	13431701	928.052	4
E03	5	14921	4602.31	210.732	1781.54	13804847	925.196	5
E03	6	14686	4194.49	277.907	651.239	16338377	1112.51	6
E03	7	15785	4234.01	272.538	1922.03	2392954	151.597	6
E03	8	14100	4310.03	387.006	1287.65	13572194	962.567	2
E03	9	11460	2974.71	417.7	204.606	1725264	150.547	0
E03	10	14958	3667.69	442.955	1728.32	11560829	772.886	2
E03	11	13787	5273.53	494.112	495.065	15650762	1135.18	10
E03	12	13770	2832.41	507.607	262.899	2156189	156.586	2
E03	13	10258	4228.99	528.166	1576.56	1819628	177.386	4
E03	14	15038	3027.49	527.889	879.591	2255722	150.001	1
E03	15	15752	4853.3	553.345	1170.24	16359022	1038.54	5
E03	16	14986	5294.35	544.51	1326.14	15881809	1059.78	8
E03	17	9977	3763.92	556.634	1822.35	2334147	233.953	4
E03	18	19346	4462.3	594.842	1934.37	21572921	1115.11	6
E03	20	15741	3967.14	642.975	120.831	12055275	765.852	8
E03	21	9721	4214.52	657.171	1478.02	6316499	649.779	1
E03	22	11160	3438.79	661.578	1700.84	1701668	152.479	3
E03	23	15745	5898.5	677.268	1065.2	23148217	1470.19	8
E03	24	13834	3724.75	683.637	851.333	2125107	153.615	0
E03	25	13818	6103.58	742.863	1209.67	14613218	1057.55	11
E03	26	12980	4169.88	750.054	672.625	3301478	254.351	2
E03	27	12104	3280.61	787.773	143.93	5654773	467.182	2
E03	28	15613	5186.4	807.271	1438.19	15320910	981.292	6
E03	29	16481	4666.51	822.966	544.096	37599871	2281.41	2
E03	30	12885	3189.43	865.153	1889.6	2562127	198.846	1
E03	31	11589	4328.66	880.116	947.395	2166718	186.963	2
E03	33	12342	4086.27	918.106	311.675	9050430	733.303	3
E03	34	16247	5995.91	932.16	813.895	15424313	949.364	10
E03	35	14496	6192.35	943.167	479.402	19954080	1376.52	6
E03	36	16888	4942.81	985.875	1963.09	17796649	1053.8	2
E03	37	14672	5361.54	1039.57	1618.51	13825543	942.308	0
E03	38	11258	3536.84	1041.05	1747.5	2001824	177.813	1
E03	39	18029	5759.88	1070.08	762.383	4075685	226.063	12
E03	40	9706	5415.16	1065.43	523.167	2345632	241.668	1
E03	41	14784	4364.12	1093.76	299.471	15661198	1059.33	2
E03	42	15601	3381.86	1141.34	44.0974	2081318	133.409	2
E03	43	14693	6950.44	1210.34	869.389	17874229	1216.51	5
E03	45	10134	4594.36	1242.21	205.415	1928126	190.263	0
E03	46	13822	5373.26	1277.38	1858.23	10766071	778.908	4
E03	47	10475	3827.47	1281.27	1966.39	1717943	164.004	1
E03	48	9477	5621.72	1288.89	413.272	2603840	274.754	2
E03	49	8782	5647.95	1324.9	269.524	1772045	201.781	0
E03	50	14097	4207.64	1345.78	736.504	2576750	182.787	1
E03	51	13809	4423.17	1353.37	589.435	2641144	191.263	4
E03	52	9820	4069.7	1376.54	1389.44	2200334	224.067	0
E03	53	11639	6135.78	1405.82	135.221	19501813	1675.56	3
E03	54	13624	4561.78	1413.29	933.061	14508804	1064.94	2
E03	55	9037	5571.04	1402.35	346.232	1656952	183.352	0
E03	57	12041	4439.44	1493.96	427.085	2070082	171.919	2
E03	58	12915	5024.85	1495.91	1862.66	14833755	1148.57	2
E03	59	8922	5618.47	1516.97	225.829	8587477	962.506	2
E03	62	8263	4863.61	1531.52	108.815	1699481	205.674	2
E03	63	12119	4273.41	1558.69	1200.53	1822345	150.371	0
E03	64	8666	4900.38	1566.07	304.103	1779057	205.292	1
E03	66	12755	6202.19	1597.62	1710.23	5687334	445.891	5
E03	67	8603	5099.28	1620.2	1943.36	1436333	166.957	0
E03	68	8305	4507.36	1622.05	125.437	2048840	246.7	0
E03	69	16661	4788.88	1737.37	129.376	24714424	1483.37	3
E03	70	8414	5991.9	1734.11	884.785	1563643	185.838	1
E03	71	14171	7579.22	1762.59	1092.3	8637792	609.54	11
E03	72	10400	3632.34	1786.87	235.634	2313098	222.413	1
E03	74	12702	6524	1858.04	1965.89	1925094	151.558	2
E03	75	8831	9052.46	1856.95	1057.58	10740406	1216.22	5
E03	76	14462	7397.81	1907.45	869.923	6361863	439.902	2
E03	77	9924	4838.4	1934.8	1206.55	2072179	208.805	1
E03	78	6011	8523.48	1934.1	1010.88	2643478	439.773	3
E03	79	11523	3854.52	1991.66	587.832	7009297	608.288	3
E03	80	6717	7509.87	1988.31	952.811	2160586	321.659	1
E03	81	7480	2993.66	2009.82	187.462	5487189	733.581	2
E03	1	8053	3492.44	36.7415	1176.72	5230267	649.481	1
E03	2	9515	3397.39	41.2955	1326.32	2599293	273.178	1
E03	4	14114	4189.97	79.5168	814.871	12382501	877.32	4
E03	5	10027	3213.59	131.744	1675.58	1478980	147.5	0
E03	6	12839	3549.19	126.427	129.147	10409844	810.799	3
E03	7	10826	3239.16	149.926	1063.22	1856949	171.527	0
E03	8	15899	4408.98	154.097	1255.59	8106776	509.892	2
E03	9	26808	4627.18	238.98	1542.99	24402704	910.277	2
E03	10	14209	5110.88	244.861	1865.42	19056711	1341.17	8
E03	11	16479	3281.88	244.997	937.869	14033051	851.572	4
E03	12	9891	3700.56	237.089	775.375	1790360	181.009	0
E03	13	8506	4459.1	263.412	1238.63	2619208	307.925	3
E03	14	12761	4636.79	283.175	1341.53	14619596	1145.65	4
E03	15	20871	4513.74	322.022	1123.02	14373687	688.692	4
E03	16	8836	4388.55	412.13	1523.56	2272932	257.235	1
E03	17	10457	3771.09	416.625	998.339	2017972	192.978	3
E03	18	8266	4062	439.052	1430.29	1398435	169.179	1
E03	19	8469	4622.07	574.341	31.9207	7905549	933.469	2
E03	20	16181	3945.25	702.675	75.4932	3479550	215.039	5
E03	21	11784	3280.21	879.224	115.605	2041780	173.267	1
E03	22	22550	5271.47	957.061	347.881	49866774	2211.39	4
E03	23	10660	3928.26	1033.82	152.87	1898741	178.118	1
E03	25	9786	4986.35	1072.95	301.613	3266927	333.837	4
E03	26	13203	7210.1	1118.8	621.688	19018493	1440.47	5
E03	28	17687	5079.46	1186.71	187.074	3045168	172.17	2
E03	29	10551	3691.56	1194.92	48.0345	1662393	157.558	1
E03	30	10615	4976.14	1188.66	522.609	2339337	220.38	4
E03	31	9870	5003.32	1174.24	325.514	1782795	180.628	1
E03	32	10390	5449.92	1256.12	723.415	2678982	257.842	0
E03	33	15228	5703.26	1361.59	571.136	22020877	1446.08	4
E03	34	10259	3499.24	1393.85	84.0014	1456483	141.971	0
E03	35	11325	3513.76	1437.9	279.345	1621971	143.22	1
E03	37	9790	4908.73	1558.58	608.436	2530286	258.456	0
E03	38	5370	3919.21	1549.61	34.2795	787498	146.648	1
E03	41	17000	7513.97	1964.17	933.854	12211749	718.338	0
E03	2	5838	4300.87	26.9981	1400.81	5482324	939.076	0
E03	3	12192	3725.25	48.8148	1541.5	10477668	859.389	6
E03	4	15620	4897.98	64.963	1753.43	12641339	809.305	3
E03	5	13585	5662.92	64.8704	1964.26	7487063	551.127	0
E03	6	9713	2935.38	79.5719	331.665	1484861	152.874	1
E03	8	8953	3427.18	178.85	586.289	1387244	154.947	3
E03	9	11705	2968.98	200.573	1616.27	1854927	158.473	0
E03	10	5151	3415.22	287.513	2022.27	706793	137.215	0
E03	11	7591	4131.75	292.182	1185.17	1176755	155.02	3
E03	12	16448	4253.43	314.987	869.779	15424315	937.762	1
E03	13	11898	3002.35	318.144	1840.74	1597095	134.232	1
E03	14	8650	3647.54	326.667	394.817	1307380	151.142	1
E03	15	10405	3605.63	335.728	1503.85	5971935	573.949	1
E03	16	9055	3875.93	356.766	1935.59	1208923	133.509	2
E03	17	11042	4860.67	426.953	1034.64	11699465	1059.54	3
E03	18	9611	3222.97	458.567	2003.41	1266813	131.809	1
E03	19	7391	5521.99	489.717	909.2	4880625	660.347	0
E03	20	11176	3140.29	534.287	295.674	1627374	145.613	1
E03	21	12616	2886.82	536.208	1847.09	1678755	133.066	0
E03	22	10187	3544.11	706.894	1808.13	5114700	502.081	1
E03	23	5730	2935.76	753.024	2020.33	1157066	201.931	1
E03	24	12060	4154.19	812.735	1824.03	10794122	895.035	4
E03	25	11578	5600.91	868.88	1706.45	13832597	1194.73	2
E03	26	14156	3981.95	905.578	1955.93	10727612	757.814	2
E03	27	8219	5226.22	916.658	1088.74	1364623	166.033	4
E03	28	9537	3817.84	1023.24	1781.08	1610978	168.919	0
E03	29	12662	4256.27	1083.54	1966.22	10678934	843.384	3
E03	31	8455	5545.1	1260.13	1037.65	1817726	214.988	5
E03	32	8149	5882.32	1342.43	821.726	1161689	142.556	0
E03	35	9639	5671.6	1550.13	1046.59	1880458	195.088	4
E03	36	12501	6319.39	1689.1	1932.16	16145753	1291.56	8
E03	37	13630	3790.91	1694.76	369.78	15019794	1101.97	3
E03	38	11853	3593.37	1809.68	99.7595	12231094	1031.9	4
E03	41	12558	5672.78	1940.25	166.704	18663981	1486.22	2
E03	42	8230	5328.31	1940.5	1416.61	1181062	143.507	0
E03	43	7845	5343.64	1999.09	1867.46	1077208	137.311	0
E03	1	6663	3758.03	38.4072	108.072	1028862	154.414	3
E03	2	11589	4133.49	53.1727	268.895	2275274	196.33	0
E03	3	5618	4164.51	28.9283	456.696	4941006	879.496	0
E03	4	7969	4103.29	119.24	138.022	1142795	143.405	2
E03	5	7879	3321.71	159.641	42.6508	1176398	149.308	1
E03	6	14236	5084.25	211.942	274.746	15669033	1100.66	4
E03	7	10704	3321.56	261.07	129.221	1970882	184.126	0
E03	8	5820	2793.52	279.665	25.1943	786274	135.099	0
E03	9	15047	4572.9	322.579	330.712	4793629	318.577	4
E03	10	10948	2990.09	411.293	163.64	2011056	183.692	3
E03	11	9180	3392.55	432.827	1713.01	1348679	146.915	3
E03	13	14055	4751.41	557.63	273.953	14595798	1038.48	17
E03	14	10632	3003.85	658.086	101.868	1511190	142.136	0
E03	15	13108	5231.31	699.692	1906.9	2348065	179.132	3
E03	16	9960	3573.1	727.188	1772.82	1639610	164.619	3
E03	17	6499	3060.78	747.893	27.5167	1456567	224.122	0
E03	18	8901	5914.53	746.663	2000.56	7595612	853.344	2
E03	19	10109	3848.84	825.446	1859.78	5377715	531.973	1
E03	21	12255	6260.64	834.953	493.238	16811370	1371.8	4
E03	22	8885	6264.11	1005.3	1093.98	1507136	169.627	1
E03	24	13304	5211.87	1103.93	1780.94	1957181	147.112	2
E03	25	10751	4251.39	1099.85	58.067	10555669	981.831	2
E03	26	8968	4155.71	1134.46	1963.27	4123127	459.76	0
E03	27	9189	4198.87	1161.76	198.632	1619589	176.253	2
E03	28	13720	5381.28	1242.26	1675.6	11873973	865.45	9
E03	29	10332	3084.13	1240.12	53.3096	7299750	706.519	0
E03	30	7895	5235.48	1272.78	1318.59	1238970	156.931	2
E03	31	8851	4395.27	1281.85	1935.18	5151889	582.069	2
E03	32	18910	4855.21	1326.13	311.381	3953990	209.095	1
E03	33	11606	3699.2	1364.91	193.693	8252228	711.031	0
E03	34	5965	1909.09	1369.16	1551.19	984845	165.104	1
E03	35	15357	5197.86	1425.89	1430.93	12007068	781.863	5
E03	36	9599	4932.92	1444.58	1166.38	1482795	154.474	4
E03	37	20380	6296.08	1588.84	642.956	30043503	1474.17	6
E03	38	11005	4028.46	1599.45	311.046	1785417	162.237	0
E03	39	14573	5369.76	1701.18	520.483	13914591	954.82	2
E03	40	11804	5065.99	1731.64	776.511	1934420	163.878	0
E03	41	11635	5473.24	1717.41	1681.35	9730099	836.278	5
E03	42	11325	4505.32	1835.36	568.575	2254638	199.085	0
E03	43	10339	4516.08	1836.47	433.386	4813392	465.557	3
E03	44	12998	4675.22	1969.64	658.434	10144520	780.468	0
E03	45	9988	4466.84	1992.34	1845.31	1379798	138.146	2
E03	1	7337	2619.58	39.5573	192.882	4658244	634.898	3
E03	3	15236	4453.84	101.627	1215.49	16716108	1097.15	4
E03	4	13645	2897.58	94.3347	892.202	3716398	272.363	4
E03	5	13409	5493.27	174.511	659.047	14765655	1101.17	5
E03	6	13773	4925.6	251.309	351.299	2082540	151.205	1
E03	7	8474	4082.77	406.211	507.157	1112338	131.265	0
E03	8	10142	3287.43	429.112	319.133	1318132	129.968	0
E03	10	9294	5607.48	502.629	591.916	1603216	172.5	0
E03	11	11423	4692.76	650.753	1486.39	13443715	1176.9	1
E03	15	9440	5160.27	1156.84	1811.01	9163427	970.702	0
E03	16	11172	6778.82	1242.41	587.343	13844382	1239.2	1
E03	17	8752	6174.12	2000.45	1006.74	6964427	795.753	1
E03	2	11433	5811.88	107.232	977.901	1729092	151.237	0
E03	3	10563	3174.89	153.671	1796.81	1965506	186.075	2
E03	4	9309	3485.32	217.198	1963.01	1161393	124.76	0
E03	7	8755	4500.97	604.683	717.716	1551880	177.256	0
E03	8	10050	3998.46	640.749	815.358	2083904	207.354	0
E03	9	15160	4841.83	650.609	403.376	2195415	144.816	3
E03	10	11526	4683.25	667.522	969.738	14104850	1223.74	1
E03	11	10386	5237.48	689.436	1084.72	14927700	1437.29	1
E03	13	9299	4636.85	687.313	79.2352	10351166	1113.15	2
E03	14	9438	4850.12	699.968	1303.2	9733518	1031.31	3
E03	15	11333	4599.57	907.692	1024.38	1874905	165.438	5
E03	16	8294	4400.47	946.123	1462.61	1525460	183.923	1
E03	17	10833	3942.09	955.906	1674.22	10020067	924.958	2
E03	18	10960	4840.55	966.786	633.572	11683139	1065.98	3
E03	19	7690	5594.02	966.399	1344.07	1337659	173.948	1
E03	20	9022	4794.41	989.87	1247.18	1601110	177.467	1
E03	21	8095	5253.41	1044.38	1388.47	1254378	154.957	1
E03	22	6901	4618.4	1460.87	1996.76	885167	128.266	1
E03	23	9655	6013.05	1733.04	1865.49	11660730	1207.74	3
E03	1	12626	6173.82	374.493	728.709	15321987	1213.53	8
E03	2	8050	4071.63	437.752	1131.7	1050048	130.441	3
E03	3	8998	4345.87	496.933	1961.94	3803529	422.708	1
E03	4	8492	4499.66	507.104	1190.18	1200201	141.333	3
E03	5	11436	4077.88	623.612	903.428	2117117	185.127	0
E03	6	9248	3984.28	621.609	374.792	1199474	129.701	2
E03	7	9047	4887.31	633.894	786.765	1706833	188.663	1
E03	8	9309	4509.94	662.128	493.34	1271250	136.561	5
E03	9	9092	5157.59	743.866	507.664	1521685	167.365	3
E03	10	9594	4365.42	773.674	378.037	1542481	160.776	3
E03	11	19184	5044.4	813.898	681.225	3446666	179.664	5
E03	12	9331	3349.86	829.329	104.912	1249211	133.878	0
E03	13	15418	6123.5	857.066	880.258	2936917	190.486	2
E03	14	11444	4384.15	854.95	1224.61	9180360	802.199	2
E03	15	8916	6101.94	906.439	987.259	2666295	299.046	4
E03	16	9332	5438.09	916.122	1133.76	2828224	303.067	1
E03	17	10157	7740.22	1026.74	913.74	15081188	1484.81	4
E03	18	10685	8162.52	1032.48	1026.49	17162511	1606.22	6
E03	19	11611	4466.62	1124.7	806.762	1976102	170.192	2
E03	20	9053	4380.19	1273.52	137.05	4740653	523.655	1
E03	23	10300	5721.42	1474.46	678.166	10947635	1062.88	6
E03	24	9535	4843.6	1480.28	1974.1	3672371	385.146	1
E03	25	9475	4158.43	1701.74	323.551	1396878	147.428	0
E03	26	8912	5033.22	1784.79	715.118	1173192	131.642	2
E03	27	14054	6120.53	1889.2	411.491	2136500	152.021	2
E03	28	15405	6125.16	1972.88	519.56	2646633	171.804	0
E03	29	9948	5080.96	1972.48	779.011	1817751	182.725	2
F03	2	7015	3052.34	40.8931	272.697	1012699	144.362	4
F03	3	8911	3688.38	57.0483	451.255	7475462	838.903	0
F03	4	12881	4657.56	55.4142	1204.35	1858485	144.281	0
F03	6	10270	2859.91	85.5466	159.446	1758762	171.252	0
F03	7	21018	5483.17	127.002	1416.72	28311156	1347	1
F03	8	9214	3672.37	101.634	923.267	1208399	131.148	1
F03	9	8444	4361.49	128.546	1033.58	1457574	172.617	1
F03	10	10312	3310.61	147.215	347.319	1650286	160.035	3
F03	11	9602	4601.88	156.724	1224.85	1942395	202.291	0
F03	12	17500	4283.88	234.967	865.091	2567382	146.708	1
F03	13	9376	3515.77	234.317	268.138	3216593	343.067	1
F03	14	10902	3787.84	224.511	535.516	10808663	991.439	0
F03	15	9240	4526.02	222.873	1295.72	2265347	245.167	0
F03	16	10314	3858.08	232.948	1071.52	1398137	135.557	1
F03	17	9200	3220.59	277.928	183.213	1289068	140.116	1
F03	18	11066	2716.81	450.108	82.3735	1550793	140.14	1
F03	19	9432	4135.56	510.958	399.597	8473657	898.395	1
F03	20	11237	5303.46	755.43	520.45	13545752	1205.46	1
F03	21	8679	4471.87	863.929	386.034	1323030	152.44	3
F03	22	7748	3925	901.094	158.1	1048006	135.261	0
F03	23	8438	4880.82	1169.68	30.8258	10694288	1267.4	3
F03	24	7799	4041.26	1217.44	1900.1	1033427	132.508	1
F03	26	7442	5710.28	1423.35	308.465	6447342	866.345	0
F03	27	12062	4523.19	1490.66	1921.45	13129643	1088.51	0
F03	28	11553	4276.24	1601	1365.18	2010443	174.019	4
F03	29	13900	3992.73	1630.52	1876.42	13808038	993.384	1
F03	30	10895	5626.7	1639.57	1538.53	12260297	1125.31	2
F03	31	10006	5833.41	1660.6	1639.37	10485158	1047.89	5
F03	33	10099	4556.06	1738.54	1730.32	2399505	237.598	3
F03	34	11958	5450.42	1767.46	1531.52	13938648	1165.63	3
F03	35	14119	6425.05	1825.79	476.922	15882236	1124.88	3
F03	36	10751	5389.16	1831.39	1638.72	11158358	1037.89	0
F03	37	10873	4776.83	1841.38	1845.98	11098359	1020.73	1
F03	38	12137	4137.46	1861.25	1382.83	1839262	151.542	0
F03	39	10470	4671.81	1851.24	1217.62	1421394	135.759	1
F03	40	11275	4124.2	1901.78	939.189	1548952	137.379	3
F03	41	11369	6384.88	1922.56	1759.37	11892457	1046.04	2
F03	44	10952	4443.55	1981.6	1388.25	1699728	155.198	3
F03	45	10687	4896.39	1985.08	1569.37	2068672	193.569	3
F03	46	5862	4324.68	2017.5	610.284	850630	145.109	0
F03	47	5640	3470.85	2018.59	55.8227	980578	173.861	3
F03	48	6065	5300.94	2022.39	1842.7	3887341	640.947	0
F03	1	8419	3552.34	46.6397	308.6	7312072	868.52	0
F03	2	7604	3029.49	43.7608	579.059	1720868	226.311	0
F03	4	6988	3898.51	28.5946	851.735	5225604	747.797	0
F03	5	8904	3085.59	26.3552	1127.91	1199026	134.662	0
F03	8	10123	3309.35	104.448	1911.58	1296585	128.083	3
F03	9	10215	3859.97	102.694	1712.31	1470441	143.949	3
F03	10	12200	3308.49	112.622	764.302	2349666	192.596	1
F03	11	9766	3925.85	130.968	1517.19	1809655	185.302	1
F03	12	9440	4069.83	161.918	1622.49	2077611	220.086	4
F03	13	9726	4004.86	180.575	1813.65	1429215	146.948	2
F03	14	12659	2850.42	206.3	1207.69	1585634	125.257	1
F03	15	9175	3993.2	201.971	1427.91	1302563	141.969	3
F03	16	10153	3455.97	215.466	682.95	1477713	145.544	0
F03	17	12506	3217.61	231.861	862.012	5761158	460.672	2
F03	18	11131	6995.03	241.128	339.433	1778082	159.741	0
F03	19	17066	4241.95	262.098	1770.46	2712705	158.954	3
F03	20	7601	2831.61	271.021	431.315	1227238	161.457	0
F03	21	13181	2928.18	319.373	1247.71	1734439	131.586	1
F03	22	11959	2430.32	329.637	954.588	1807015	151.101	0
F03	23	11507	2971.25	316.264	1985.82	1706411	148.293	0
F03	24	15006	4840.06	387.266	691.022	12964650	863.964	4
F03	25	11983	3657.76	396.052	1436.49	5665149	472.766	0
F03	26	14101	4091.2	414.889	575.065	10438021	740.233	5
F03	27	12650	3285.95	395.608	1560.38	2325431	183.829	0
F03	28	14938	4434.3	406.026	1854.97	10464513	700.53	5
F03	29	16164	2770.44	470.129	1030.1	6078155	376.03	1
F03	30	14114	5703.17	478.65	800.258	18248741	1292.95	11
F03	31	10275	3229.93	498.269	426.307	5359290	521.585	3
F03	32	15257	3058.13	517.075	1173.58	2629077	172.319	0
F03	33	15686	2941.85	514.343	1720.71	4218281	268.92	0
F03	34	16587	5059.67	544.045	1344.72	2347118	141.503	6
F03	35	11428	3264.6	582.465	1891.86	2155350	188.603	1
F03	39	8101	3505.16	619.206	125.21	1101853	136.014	2
F03	40	13986	6617.26	659.599	835.051	22900275	1637.37	0
F03	41	11168	3996.81	661.448	675.373	2123552	190.146	2
F03	42	16236	2739.68	680.894	1444.55	2560079	157.679	2
F03	44	12639	7029.93	718.581	992.696	5312312	420.311	2
F03	45	13050	4905.19	755.832	1797.65	11286393	864.858	4
F03	48	10388	3463.02	797.53	1621.57	6103544	587.557	2
F03	50	13417	6004.37	848.851	433.908	18982350	1414.8	4
F03	51	16705	3864.46	858.726	1894.12	2393050	143.254	1
F03	52	7228	2641.02	841.502	1460.35	1013786	140.258	1
F03	53	11926	3919.09	895.364	1044.79	1889028	158.396	1
F03	54	11487	4382.01	907.688	697.713	2403879	209.27	1
F03	55	13199	7292.94	896.268	836.808	16114769	1220.91	1
F03	56	11222	1688.06	915.043	1552.47	2774824	247.266	1
F03	61	6288	1436.59	1058.4	1898.78	731878	116.393	0
F03	62	13076	4146.89	1079.05	902.545	2473332	189.151	6
F03	64	9828	4335.52	1123.64	1152.1	1323062	134.622	1
F03	65	10494	3998.58	1138.74	1377.34	7118582	678.348	0
F03	66	15124	6700.39	1196.36	694.833	30312171	2004.24	2
F03	69	10843	5844.2	1210.88	1518.99	12209277	1126.01	1
F03	70	8129	5418.33	1218.02	1115.45	1225184	150.718	1
F03	71	10611	4083.63	1259.89	1301.19	1793240	168.998	1
F03	73	8322	5450.08	1291.69	1194.26	1316912	158.245	0
F03	76	12380	4630.79	1446.87	1480.3	14667663	1184.79	2
F03	77	11867	4258.56	1463.36	703.991	2050382	172.78	0
F03	79	8496	5003.38	1671.15	31.273	8547172	1006.02	1
F03	80	11569	4274.91	1732.63	688.974	1864165	161.134	1
F03	81	5175	1453.86	1893.76	721.262	658201	127.189	0
F03	82	8947	2599.57	2005.71	75.1651	1172952	131.1	1
F03	83	8591	5787.48	2010.52	769.103	2498186	290.791	1
F03	1	7705	3384.82	39.3403	836.809	930176	120.724	4
F03	3	11234	3332.29	201.555	873.488	1555803	138.491	1
F03	4	11759	3132.68	280.938	550.072	7128638	606.228	1
F03	6	10168	3445.68	336.562	724.892	1517308	149.224	0
F03	7	7877	3013.19	408.097	2006.44	5406094	686.314	3
F03	8	12939	2707.52	401.062	383.286	1698979	131.307	3
F03	9	13611	2280.97	433.341	81.9869	1801491	132.356	1
F03	10	11449	3019.37	530.274	1797.63	1668933	145.771	1
F03	11	7486	3251.62	579.64	44.4228	1157212	154.583	0
F03	12	10852	3095.1	655.872	1988.95	1748424	161.115	2
F03	13	7929	3697.45	665.062	52.3544	1416998	178.711	0
F03	14	13299	4372.43	684.324	1460.21	12218791	918.775	3
F03	15	15185	4367.03	691.123	1672.7	12105737	797.217	6
F03	16	9659	4046.17	753.913	78.5239	8651029	895.644	3
F03	17	9738	3638.96	769.556	1989.39	1643071	168.728	0
F03	18	14818	3857.51	794.838	1809.85	10744791	725.117	4
F03	19	11968	3608.17	814.497	1563.13	2260891	188.911	2
F03	20	14227	3523.12	890.994	143.906	2243458	157.69	2
F03	21	11885	3351.02	906.792	1945.99	1909452	160.661	1
F03	22	7601	5388.26	923.257	1384.04	3610601	475.017	1
F03	24	10671	3983.93	954.425	1782.25	1870985	175.334	1
F03	25	9754	4540.74	959.82	1643.15	6242374	639.981	3
F03	26	10485	4435.66	987.44	1532.5	1728848	164.888	1
F03	27	9553	4742.15	1024.82	1439.69	1487320	155.691	2
F03	28	8491	5441.01	1060.55	1349.84	1695487	199.68	0
F03	29	9916	7628.5	1074.95	833.654	4822050	486.29	0
F03	31	9153	4135.92	1079.33	1954.83	1820534	198.9	1
F03	32	9798	4372.31	1073.8	1758.04	1685452	172.02	2
F03	34	10590	4179.49	1155.44	1551.65	1918547	181.166	2
F03	35	9609	4909.4	1178.8	1757.86	1900702	197.804	3
F03	36	6941	891.612	1199.95	34.9069	796062	114.69	0
F03	37	8730	4844.34	1194.73	1643.73	2646083	303.102	1
F03	39	11859	7453.92	1278.94	1847.21	11538021	972.934	6
F03	40	10662	4083.3	1303.96	1677.54	6287330	589.695	2
F03	41	12744	7035.67	1366.8	1962.15	16008314	1256.15	7
F03	42	6552	912.069	1380.51	298.477	830597	126.77	0
F03	43	11290	7426.97	1441.31	1842.27	14877595	1317.77	4
F03	44	11325	5723.11	1682.6	1647.78	15758021	1391.44	2
F03	46	8269	5342.19	1712.93	408.442	1328733	160.688	4
F03	47	5228	1292.07	1745.6	1526.25	890595	170.351	0
F03	48	23740	5087.19	1885.21	218.686	24683866	1039.76	6
F03	49	6529	2535.09	1836.39	1072.45	1611765	246.862	0
F03	50	12787	6971.56	1867.04	1179.32	22321495	1745.64	4
F03	51	10341	2929.2	1981.76	89.1439	2054322	198.658	4
F03	52	5368	4991.3	2019.92	1030.03	844278	157.28	1
F03	1	9613	4771.77	102.697	237.98	10014372	1041.75	4
F03	2	9572	3922.52	188.137	553.884	9459565	988.254	3
F03	4	17512	3421.76	316.281	364.522	2559247	146.142	1
F03	5	6000	1000.89	332.295	764.089	741118	123.52	0
F03	6	18126	2588.32	397.441	82.9066	9985384	550.887	1
F03	7	14052	6064.93	499.48	791.089	3049801	217.037	6
F03	8	14117	5177.17	487.561	526.324	13274270	940.304	9
F03	9	7187	4368.3	507.693	2016.79	4389899	610.811	3
F03	10	38054	4558.47	603.939	190.888	27888672	732.871	10
F03	11	11192	1764.7	693.689	780.515	1467693	131.138	0
F03	13	9041	4647.16	688.333	565.537	1551531	171.611	0
F03	14	9736	4146.96	692.515	454.244	1520926	156.217	2
F03	15	14270	5049.74	728.559	1951.6	3418523	239.56	3
F03	18	12339	5567.55	864.114	1987.46	13635800	1105.1	1
F03	19	14327	5685.78	894.746	438.294	14551863	1015.7	6
F03	20	11768	3640.22	922.638	59.6056	10234697	869.706	4
F03	21	8552	6372.03	926.005	746.297	1468899	171.761	1
F03	23	8854	3964.39	971.516	1618.32	1250381	141.222	1
F03	24	17538	4838.75	1077.95	121.293	27458552	1565.66	1
F03	26	10677	3858.37	1063.61	1345.89	2718663	254.628	0
F03	27	7280	4333.71	1115.05	31.7905	7367549	1012.03	1
F03	28	13286	4084.73	1172.81	627.449	2256155	169.814	1
F03	29	9945	4889.68	1180.69	1026.35	4652805	467.854	1
F03	30	11788	4515.45	1206.93	309.16	11718005	994.062	4
F03	31	9177	4007.31	1244.62	1485.63	1297097	141.342	1
F03	32	11266	4477.06	1258.26	567.97	1875956	166.515	0
F03	34	20651	3823.51	1360.37	945.446	18842588	912.43	6
F03	35	8517	4714.2	1337.6	99.3642	8152977	957.259	2
F03	37	10443	5203.58	1375.45	692.419	2620451	250.929	2
F03	38	11082	3595.91	1407.14	1510.34	1802495	162.651	1
F03	39	15041	5625.5	1439.57	432.851	11929102	793.106	4
F03	40	15282	3788.5	1434.47	1300.17	3170292	207.453	2
F03	41	16304	6421.83	1491.3	741.328	23408792	1435.77	2
F03	42	15238	4354.9	1549.08	1540.91	14170392	929.938	8
F03	43	14955	5502.59	1551.21	1343.48	14156529	946.608	4
F03	44	16879	5969.8	1591.79	1059.32	24271924	1438	11
F03	45	8507	1595.28	1668.52	395.003	1173118	137.9	0
F03	46	12347	7227.3	1704.74	1436.32	17730848	1436.05	2
F03	47	10749	3615.47	1707.1	1819.82	1410782	131.248	2
F03	49	9166	5302.99	1748.2	819.855	1314006	143.357	0
F03	50	25136	6808.32	1797.41	1333.12	28296271	1125.73	4
F03	51	8409	5291.61	1791	466.689	1836259	218.368	1
F03	52	16296	6170.43	1970.56	1387.4	21544018	1322.04	5
F03	53	10925	3146.3	2011.05	93.0645	11688838	1069.92	3
F03	2	6499	3553.11	31.8721	461.425	985978	151.712	2
F03	3	5342	3007.14	30.0552	615.908	717397	134.294	2
F03	6	5237	3966.86	77.5475	29.4655	4164160	795.142	2
F03	7	11064	5293.87	129.402	497.152	8218349	742.801	5
F03	8	20548	3711.86	170.874	365.543	3394099	165.179	0
F03	9	8438	4017.96	154.234	658.538	1425876	168.983	2
F03	10	7985	3579.86	166.553	68.6415	1422432	178.138	2
F03	12	16835	4649.54	257.847	596.796	8346787	495.8	3
F03	13	8957	3629.53	268.698	296.826	1182492	132.019	2
F03	14	9490	4916.21	317.842	822.168	8280278	872.527	2
F03	15	8558	5345.05	337.458	712.629	7947087	928.615	0
F03	16	11695	4275.14	433.058	543.408	7797321	666.723	2
F03	17	10033	5928.88	480.248	697.313	9545366	951.397	2
F03	18	17386	5147.28	538.813	941.033	25946715	1492.39	3
F03	19	11158	6926.87	545.994	782.215	12320654	1104.2	2
F03	20	10893	3735.22	546.779	1354.88	2558442	234.87	0
F03	21	11294	3933.24	554.699	1177.89	2281068	201.972	3
F03	22	9930	3784.94	554.764	1875.31	7263783	731.499	2
F03	23	14571	6269.48	603.638	657.019	21710538	1489.98	1
F03	24	13949	3703.17	631.681	1531.74	10567217	757.561	3
F03	25	11607	4600.77	717.21	1212.28	12538512	1080.25	3
F03	26	12067	4155.77	731.681	1623.23	10154254	841.49	3
F03	27	9180	3840.13	753.979	1415.45	1487646	162.053	1
F03	28	9037	3906.86	902.505	1681.73	1593017	176.277	1
F03	30	9865	4929.7	1008.6	1295.6	9441329	957.053	2
F03	31	12592	5534.23	1290.3	294.491	19628227	1558.79	1
F03	32	9241	4995.22	1314.71	971.036	1690109	182.892	0
F03	33	13739	5153.91	1396.51	503.993	17648846	1284.58	5
F03	34	14327	7727.2	1447.45	774.268	27998786	1954.27	1
F03	35	14044	2546.38	1487.11	81.4102	1804593	128.496	3
F03	36	9355	5314.62	1541.79	522.727	2018491	215.766	0
F03	37	12063	3421.64	1572.05	266.298	7325452	607.266	5
F03	38	11950	4435.59	1651.45	633.339	2101552	175.862	0
F03	39	11371	4521.21	1668.73	499.04	3022470	265.805	0
F03	40	11950	4594.25	1661.6	944.647	2615045	218.832	3
F03	41	9847	6685.61	1682.56	1425.71	10012502	1016.81	4
F03	42	15391	6299.24	1714.12	1115.75	17761324	1154.01	9
F03	44	13423	5115.32	1746	376.923	14684739	1094	3
F03	45	13421	6885.57	1746.92	1309.86	16478036	1227.78	9
F03	46	11037	4536.71	1802.23	643.129	1898919	172.05	0
F03	47	31178	5508.81	1875.74	940.106	32657236	1047.44	4
F03	48	6928	4936	1816.12	57.1165	1308561	188.88	0
F03	49	7739	4608.28	1892.58	139.667	1359520	175.671	0
F03	50	10041	5719.66	1929.93	1737.57	10044570	1000.36	4
F03	51	14636	3522.13	1972.06	624.432	11973907	818.113	2
F03	2	7984	3859.11	36.7454	780.2	1765293	221.104	1
F03	3	9434	2771.02	54.3369	188.122	1175506	124.603	0
F03	5	9196	3503.04	269.936	1684.07	1409722	153.297	0
F03	6	13640	4928.26	313.757	980.871	1910973	140.101	2
F03	7	15450	4587.23	386.126	1747.14	14237744	921.537	4
F03	8	13112	4440.04	495.309	1536.73	10920563	832.868	4
F03	9	13736	4953.68	647.861	1397.83	11832808	861.445	2
F03	10	16463	4740.94	666.355	1541.83	14913590	905.885	4
F03	11	14624	3093.23	690.097	1816.63	10917133	746.522	1
F03	12	11166	3322.08	714.93	1673.19	1972149	176.621	0
F03	14	23304	4695.56	875.846	1448.49	14242265	611.151	2
F03	15	10579	5326.62	837.64	1319.63	12301946	1162.86	1
F03	16	9549	3641.44	898.787	1859.97	1350819	141.462	2
F03	17	14105	4182.94	937.933	1670.62	9636241	683.179	5
F03	19	20562	4775.62	991.278	1089.95	3394762	165.099	3
F03	20	10862	3875.42	1006.19	1799.13	1953438	179.841	2
F03	21	12226	6367.52	1051.16	884.01	13988621	1144.17	2
F03	22	11589	4398.71	1060.21	1344.26	8287978	715.159	2
F03	23	12771	4292.02	1102.24	1702.95	10388828	813.47	4
F03	24	10485	3721.19	1114.45	1845.22	1781462	169.906	1
F03	25	10738	4097.78	1179.59	1431.68	1789875	166.686	2
F03	26	5291	4449.12	1182.45	1085.85	795640	150.376	0
F03	27	9523	4836.51	1251.09	1219.49	1430752	150.242	0
F03	28	5740	4871.52	1254.67	1037.43	1086833	189.344	1
F03	29	11616	3710.23	1316.29	1375.83	1720949	148.153	0
F03	30	10042	5367.83	1331.12	1105.72	1947540	193.939	1
F03	31	15160	6781.72	1346.74	905.34	18946679	1249.78	9
F03	32	14984	3262.13	1331.59	1813.01	11567959	772.021	3
F03	33	13721	3198.81	1360	1652.3	9341167	680.793	2
F03	34	10680	4643.99	1420.78	1195.89	2023425	189.459	1
F03	35	11295	6830.64	1456.64	1073.6	12023592	1064.51	2
F03	36	9056	6192.04	1477.41	886.996	3006671	332.009	2
F03	37	12687	3216.57	1525.5	1472.58	1918927	151.251	1
F03	38	9693	3858.63	1547.1	1686.11	3834775	395.623	0
F03	39	10303	5443.08	1576.34	931.397	8674694	841.958	1
F03	40	11118	4553.01	1598.46	1097.62	1897557	170.674	1
F03	41	11490	4181.16	1642.8	1795.4	9965122	867.287	3
F03	42	10326	4216.89	1861.25	1819.69	2681591	259.693	0
F03	44	9646	4730.24	1900.03	1666.32	2154377	223.344	1
F03	45	9798	4773.82	1972.89	1556.94	2160915	220.547	0
F03	46	11751	4890.14	1992.08	1802.5	11809544	1004.98	1
F03	2	9040	3135.89	71.6708	233.067	1331814	147.325	1
F03	3	8533	3727.03	166.764	1895.75	1177935	138.045	1
F03	4	7613	3776.73	262.969	218.841	1153185	151.476	1
F03	5	11418	4602.26	268.603	780.825	11459525	1003.64	2
F03	8	8422	4607.89	349.072	537.547	1317201	156.4	0
F03	9	8064	5670.72	492.376	1251.94	2011141	249.397	1
F03	10	13888	5334.62	684.328	457.321	15577033	1121.62	6
F03	11	10272	5129.49	759.6	282.7	12289339	1196.39	4
F03	12	10414	4377.03	777.889	42.4604	8670277	832.56	4
F03	13	10842	3579.62	942.171	51.6891	10373661	956.803	2
F03	14	10407	3732.44	939.72	218.054	5692088	546.948	2
F03	15	13124	3829.02	1108.89	153.385	12789241	974.493	3
F03	16	14430	3492.51	1289.94	132.618	12727943	882.047	1
F03	17	9690	4702.75	1415.61	1527.63	1672180	172.568	5
F03	18	14023	5880.74	1449.45	1327.37	13832158	986.391	5
F03	19	9980	4174.86	1504.67	266.641	4455725	446.465	4
F03	20	23528	4523.33	1548.56	1795.77	14235253	605.035	3
F03	21	8689	5797.21	1538.03	1629.76	2017220	232.158	3
F03	22	18049	6123.79	1593.42	1529.57	15295715	847.455	3
F03	23	11907	2709.51	1636.06	101.259	1840287	154.555	2
F03	24	8727	5585.22	1651.79	709.453	1265625	145.024	1
F03	25	20827	5918.01	1709.81	1569.72	14986370	719.565	1
F03	26	12911	5915.3	1811.09	1552.79	12277832	950.959	1
F03	27	15622	4955.51	1857.84	1899.18	14861661	951.329	4
F03	28	12187	4796.49	1861.44	1699.43	11484874	942.387	1
F03	29	19198	5773.21	1896.14	283.671	14997854	781.22	7
F03	30	7487	3270.4	1875.96	37.9029	1423426	190.12	1
F03	32	13038	4172.23	1950.37	147.995	11574557	887.756	4
F03	33	7138	4991.63	2010.78	1578.59	2428730	340.254	0
F03	34	9723	4140.42	2012.55	1782.1	8583380	882.791	0
F03	36	7625	5345.66	2016.4	302.073	7652252	1003.57	3
F03	3	8333	1136.04	132.36	1291.24	1124444	134.939	0
F03	4	9681	3726.22	294.568	1231.56	7722669	797.714	2
F03	5	14455	3746.65	343.871	96.5109	13647200	944.116	5
F03	6	11557	3172.27	902.031	1594.35	7372328	637.91	0
F03	7	12236	4753.09	1069.04	1269.52	18344520	1499.23	4
F03	8	7887	4165.34	1069.95	73.3179	1067570	135.358	2
F03	9	14606	5053.09	1269.16	1789.12	16916424	1158.18	4
F03	10	13996	6492.77	1479.59	773.338	17197108	1228.72	3
F03	12	10172	5549.38	1533.55	1032.58	2058123	202.332	0
F03	13	16250	5638.21	1607.54	388.321	17301220	1064.69	7
F03	14	11452	3725.51	1590.19	1391.72	1730616	151.119	1
F03	15	11887	6191.63	1600.32	890.456	17310436	1456.25	1
F03	16	10083	5068.52	1594.76	1169.16	1935082	191.915	4
F03	17	11652	5673.29	1611.38	757.147	15395182	1321.25	2
F03	18	10204	5205.19	1610.51	513.454	2305204	225.912	2
F03	19	10500	4917.57	1688.15	1224.78	8028714	764.639	3
F03	20	10051	5689.79	1695.99	1029.9	3076408	306.08	2
F03	21	10231	5514.23	1733.56	747.145	2315185	226.291	2
F03	22	11384	4500.46	1746.6	573.161	1757412	154.376	0
F03	23	12954	2510.15	1780	130.375	1785601	137.842	0
F03	24	14016	6433.97	1816.9	1253.69	14909004	1063.71	2
F03	25	10251	5428.02	1802.78	1058.32	2488385	242.746	1
F03	26	10117	5641.95	1850.99	756.646	7078320	699.646	2
F03	27	15243	6353.82	1923	586.23	5741280	376.65	11
F03	28	13513	6850.96	1924.19	967.512	19532836	1445.48	5
F03	29	15175	5891.19	1975.36	769.524	21230699	1399.06	2
F03	30	10580	4769.88	1975.26	423.563	8394897	793.469	1
F03	32	6409	7107.03	1988.66	1079.35	9458665	1475.84	1
F03	34	8420	3776.82	2019.57	242.743	1215282	144.333	0
F03	36	7287	5228.18	2018.8	550.081	1366656	187.547	3
F03	1	13476	4389.7	45.1098	1183.68	13103845	972.384	5
F03	2	13039	2705.28	58.1275	1567.72	1947298	149.344	2
F03	3	15174	3181.96	78.8183	412.361	10595042	698.237	3
F03	4	12650	2950.2	79.9908	642.858	6553720	518.081	1
F03	5	22871	2620.96	137.745	184.454	3117730	136.318	2
F03	6	11087	3075.32	113.107	797.698	1676796	151.24	1
F03	7	12544	3655.19	135.919	1906.84	8745654	697.198	3
F03	8	11655	4047.01	163.898	1655.93	8854038	759.677	2
F03	9	11799	2921.57	180.337	337.035	2165993	183.574	1
F03	10	11722	3101.44	179.685	951.095	4701793	401.108	1
F03	11	7184	4411.72	174.986	2004.2	5798559	807.149	3
F03	12	11424	3271.79	216.837	713.238	1751940	153.356	0
F03	13	10018	3586.03	219.705	465.407	4715744	470.727	5
F03	14	13724	4410.64	258.95	1788.61	12642947	921.229	2
F03	15	24933	4199.14	287.415	1184.79	15263166	612.167	6
F03	16	10123	2668.05	280.855	66.9452	1369366	135.273	0
F03	17	9588	3986.54	271.713	556.972	1591295	165.967	6
F03	18	9304	4099.58	340.989	641.063	1599450	171.91	2
F03	19	15341	4827.48	394.118	520.433	2359499	153.803	4
F03	20	11652	3234.79	388.927	1452.35	2176087	186.757	5
F03	21	11668	3770.3	405.52	306.696	11744918	1006.59	1
F03	22	10752	3170.4	403.612	1870.76	1618108	150.494	0
F03	23	12788	4189.5	459.873	180.967	10481756	819.656	0
F03	24	15045	4686.63	468.625	1369.78	11631965	773.145	14
F03	25	10898	3051.89	477.591	1989.43	1482783	136.06	1
F03	26	10697	4256.22	488.632	431.137	2278292	212.984	0
F03	27	13708	2983.02	578.788	1622.47	6835609	498.658	2
F03	28	6271	3164.67	615.975	2014.77	1361299	217.078	1
F03	29	19331	4255.27	618.448	295.231	17384205	899.292	2
F03	30	10768	3816.52	619.031	459.124	6784821	630.091	2
F03	31	17389	3565.52	669.693	1803.77	11903349	684.533	6
F03	32	10577	4707.5	808.491	1687.77	9569909	904.785	1
F03	33	11159	4166.84	801.804	838.225	5043269	451.946	0
F03	34	12179	3666.08	835.97	1876.17	8747702	718.261	0
F03	36	9368	3829.22	892.89	1786.81	2021433	215.781	0
F03	38	9431	4195.3	1019.46	1545.58	5938365	629.664	0
F03	39	14461	2631.72	1121.86	1917.92	2226554	153.97	0
F03	40	10821	3534.84	1137.05	1342.02	1840824	170.116	6
F03	41	27014	4048.17	1221.45	1749.93	4231352	156.636	4
F03	42	10741	3478.11	1299.97	1519.52	1467127	136.591	1
F03	43	14492	3884.14	1388.14	1896.56	12084558	833.878	4
F03	44	12905	3153.18	1457.56	1456.75	1782952	138.16	4
F03	45	15564	3855.43	1432.12	1727.99	12444260	799.554	1
F03	47	10934	4415.44	1631.89	1995.1	8568402	783.648	1
F03	48	11216	4182.18	1655.85	1598.94	7950831	708.883	2
F03	49	10376	4110.94	1831.85	1383.64	1730064	166.737	0
F03	50	6768	3593.91	1832.08	2012.28	1029643	152.134	1
F03	51	10525	3814.98	1865.21	1731.42	1558625	148.088	2
F03	52	15277	4844.17	1964	1512.29	16112643	1054.7	4
F03	53	6899	5554.38	2005.59	1397.64	7927179	1149.03	5
F03	54	7881	5080.46	2016.5	1253.29	1899574	241.032	0
F03	55	6570	4159.05	2020.23	906.636	1229620	187.157	0
F03	56	7705	4240.06	2020.36	1676.41	6920777	898.219	3
F03	1	10427	3563.51	45.7128	1604.07	1626017	155.943	0
F03	3	7170	3534.88	30.555	1983.48	4973986	693.722	1
F03	4	8355	3998.75	55.7787	1447.25	1092448	130.754	0
F03	5	10295	2939.49	75.6363	491.588	1699848	165.114	2
F03	6	13094	3571.08	84.9767	1738.33	7764974	593.018	5
F03	7	10464	3575.02	128.817	1368.23	1420006	135.704	1
F03	9	12526	3377.51	197.889	1552.38	1849919	147.686	3
F03	10	11194	3023.1	199.751	1934.94	1713361	153.061	2
F03	11	11838	3435.48	221.965	276.907	10127164	855.479	3
F03	12	10294	3364.82	243.056	1719.63	1479213	143.697	1
F03	13	8799	3015.99	268.527	93.807	1280011	145.472	2
F03	14	13944	2850.63	287.887	1283.64	2168926	155.545	2
F03	16	7331	3104.56	282.54	2003.04	1893923	258.344	1
F03	17	10979	3340.91	351.958	1675.23	1491637	135.863	1
F03	18	9810	3687.3	386.029	224.316	2519184	256.798	4
F03	19	5993	3586.27	390.644	2012.55	852319	142.219	1
F03	20	11960	3210.95	408.445	1508.67	1666472	139.337	2
F03	21	12739	3088.86	425.675	1876.21	1979008	155.35	2
F03	22	9466	3765.09	448.157	296.441	1735618	183.353	2
F03	23	10826	2863.08	458.067	105.444	3928705	362.895	0
F03	24	12286	4593.4	462.317	1127.46	17000523	1383.73	2
F03	25	11495	3296.97	468.245	460.834	1895560	164.903	0
F03	26	12982	3016.48	474.252	1706.03	3907875	301.023	3
F03	27	10915	3849.34	489.88	1315.97	6749702	618.388	0
F03	28	10614	3992.17	511.596	1439.77	2646348	249.326	1
F03	29	11180	4313.72	565.724	1155.58	8478333	758.348	0
F03	30	8988	4541.77	595.253	728.145	5640389	627.547	6
F03	32	5130	2881.85	602.687	27.6099	1260982	245.805	2
F03	33	13341	2919.61	626.968	279.955	1969876	147.656	0
F03	34	11464	4268.81	630.553	1995.39	8170116	712.676	2
F03	35	11748	3660.72	640.925	566.346	2637942	224.544	3
F03	36	8736	5113.35	631.798	862.439	1964884	224.918	1
F03	37	11028	3668.51	641.377	1479.69	5028608	455.985	1
F03	38	13140	4043.99	656.571	1689.98	8635472	657.19	2
F03	39	14343	3461.66	666.531	96.1063	11393583	794.365	4
F03	40	11905	3809.36	665.622	1306.05	3155787	265.081	2
F03	41	11248	4574.38	666.797	1120.48	2553763	227.042	1
F03	42	24589	4738.63	718.714	1842.25	19930265	810.536	8
F03	43	20306	5209.06	715.58	923.238	17972637	885.09	1
F03	44	20739	5488.74	782.432	1633.79	17586817	848.007	4
F03	45	16424	2830.2	825.66	290.161	2535877	154.401	2
F03	46	11002	3107.2	830.082	105.93	1845134	167.709	0
F03	47	14487	3572.05	864.055	557.8	2854658	197.05	2
F03	48	12981	3887.19	862.22	751.381	2024438	155.954	0
F03	49	10852	4355.46	879.874	1095.02	3936942	362.785	0
F03	50	11382	4141.21	893.126	1274.02	8628506	758.083	2
F03	51	13910	3693.18	941.907	903.918	2626231	188.802	2
F03	52	12068	3258.21	970.922	59.8975	8349891	691.903	3
F03	54	14681	4126.84	1004.88	506.875	14853473	1011.75	5
F03	55	11334	4787.63	1034.18	1105.23	9114091	804.137	3
F03	56	10055	3550.25	1087.55	248.485	1528543	152.018	2
F03	57	15235	5331.46	1214.35	1311.68	4923114	323.145	7
F03	58	14782	6275.03	1305.88	603.999	3996152	270.339	2
F03	59	6954	2937.36	1547.58	48.1838	1243042	178.752	1
F03	60	10717	4557.23	1569.34	527.386	1691018	157.788	0
F03	61	11629	5703.03	1571.7	835.596	10570838	909.007	5
F03	62	21387	5101.59	1632.34	661.247	12259039	573.2	2
F03	63	8522	3376.22	1650.13	39.7105	6195944	727.053	3
F03	64	23585	4060.33	1709.48	415.548	4295088	182.111	1
F03	65	9990	5631.66	1681.98	820.403	2161368	216.353	2
F03	66	13004	4350.66	1769.68	1825.59	10767053	827.98	2
F03	67	12871	4912.89	1820.59	499.017	13183530	1024.28	2
F03	68	15188	2650.42	1837.11	232.96	2246123	147.888	2
F03	69	6254	2570.97	1844.8	30.9013	923970	147.741	1
F03	70	22471	4994.79	1934.25	1938.67	23333321	1038.37	2
F03	71	14029	4830.32	1902.83	708.081	15477492	1103.25	2
F03	72	14852	6094.72	1920.61	1724.34	15652575	1053.9	8
F03	73	6985	5751.98	2008.51	1586.52	6065315	868.334	1
F03	74	9585	5359.93	2014.59	1193.45	1488480	155.293	2
F03	2	5665	4349.27	26.9154	287.541	4770356	842.075	3
F03	4	6525	3398.76	27.0043	1789.75	4811808	737.442	1
F03	6	8279	4160.21	49.8111	477.228	1954549	236.085	3
F03	7	13094	4609.2	70.0303	146.525	14894836	1137.53	2
F03	8	12513	4429.23	83.0838	1916.52	9373429	749.095	3
F03	9	10861	3345.33	103.801	1206.57	6163480	567.487	1
F03	10	16068	3913.95	114.285	1659.54	10521056	654.783	5
F03	12	8947	4004.37	144.23	417.362	1476332	165.009	1
F03	13	11128	3046.18	205.778	314.218	2091650	187.963	0
F03	14	8919	3775.67	199.155	504.49	1313251	147.242	3
F03	15	10714	2828.3	199.505	118.937	5358854	500.173	1
F03	16	12740	3070.81	234.207	727.556	8278541	649.807	1
F03	17	14578	5003.06	270.26	1921.69	4264375	292.521	8
F03	18	5789	2255.49	284.895	35.3439	1489464	257.292	1
F03	19	12849	4838.24	375.489	1856.9	10862566	845.402	7
F03	20	18615	4097.31	387.66	1403.91	2653322	142.537	4
F03	22	12191	3149.18	406.282	982.286	2007885	164.702	0
F03	24	11902	4245.2	404.702	790.26	11653574	979.127	2
F03	25	12397	2629.88	433.043	134.518	2153080	173.678	3
F03	26	29026	4353.96	454.867	1689.68	23437377	807.461	8
F03	27	13147	2659.5	439.224	281.656	1929889	146.793	1
F03	28	15212	4307.88	474.889	442.583	13094178	860.78	9
F03	29	15174	4080.05	598.216	187.564	10214583	673.164	10
F03	30	11263	3497.33	610.653	1995.6	2233883	198.338	0
F03	31	23009	5148.33	620.732	1426.52	3993702	173.571	2
F03	32	5013	3164.5	621.323	24.0678	3303504	658.987	1
F03	33	10208	4082.56	630.284	1187.03	1387785	135.951	2
F03	34	14509	5394.43	662.633	1574.13	12582105	867.193	3
F03	35	11903	3255.37	659.876	1758.54	1865557	156.73	1
F03	36	10713	4380.52	749.554	1348.94	1679419	156.765	1
F03	37	11287	4365.68	767.102	1234.87	1640022	145.302	0
F03	38	9374	4679.57	790.589	1140.93	1375043	146.687	0
F03	39	13312	5613.8	800.318	1680.32	12791923	960.932	3
F03	40	10941	3454.42	820.297	1844.88	1812459	165.658	1
F03	41	10472	4202.5	898.072	1512.69	1619493	154.65	1
F03	42	11200	4074.18	925.693	1403.41	1756197	156.803	0
F03	43	9387	4114.56	943.621	2012.08	1504196	160.242	1
F03	44	19298	4990.24	1003.35	1227.25	2803449	145.271	2
F03	45	9769	3759.37	967.931	1749.08	1510274	154.599	0
F03	46	11507	3375.64	1046.03	1653.81	1580702	137.369	1
F03	47	10622	4148.15	1063.47	1461.22	1472043	138.584	1
F03	48	12880	4787.72	1052.98	1923.49	11966544	929.08	1
F03	49	9693	4717.93	1065.46	1071.36	1721058	177.557	1
F03	50	10856	4391.27	1096.82	1334.12	1513302	139.398	1
F03	51	8557	5506.49	1122.18	2000.11	6764046	790.469	2
F03	52	10799	3800.4	1138.88	1557.08	1532791	141.938	2
F03	53	11278	4273.91	1214.03	1228.34	1583156	140.376	2
F03	55	15100	5041.14	1257.86	1785.94	14250057	943.712	3
F03	56	11399	4399.93	1273.22	1083.79	2155183	189.068	1
F03	57	16530	5323.85	1330.3	1461.77	18294738	1106.76	7
F03	58	10480	4061.61	1428.54	1497.32	2179909	208.007	2
F03	59	9697	4159.98	1468.48	1750.79	1477606	152.378	1
F03	61	9484	4883.79	1558.51	1199.52	1612940	170.07	0
F03	62	11303	5058.94	1570.81	904.111	2648924	234.356	1
F03	2	10773	3803.16	39.1404	253.173	1541269	143.068	0
F03	5	9975	3737.66	79.7035	568.898	1768116	177.255	0
F03	6	15663	3867.73	122.255	68.6134	8229305	525.398	1
F03	7	16208	4823.43	112.038	378.51	10202145	629.451	3
F03	8	13598	3748.69	169.071	649.457	10507111	772.695	2
F03	9	8827	4079.76	200.441	489.992	1639072	185.688	2
F03	10	9036	3534.02	243.891	105.99	1528599	169.168	1
F03	11	11140	3520.4	254.988	285.777	1761116	158.089	2
F03	12	11522	3500.49	299.475	813.323	1943841	168.707	1
F03	13	9611	3673.34	300.678	509.06	1492915	155.334	0
F03	14	10752	3620.61	319.786	650.164	5705755	530.669	1
F03	15	8752	3855.66	335.309	361.983	1400752	160.049	1
F03	16	10301	3046.44	348.788	1652.76	1282664	124.518	1
F03	17	11810	4303.29	383.746	54.2995	9567458	810.115	2
F03	18	9176	3852.62	402.728	1164.41	1337146	145.722	0
F03	19	9426	4100.45	413.018	792.657	1537303	163.092	1
F03	20	8660	4592.37	441.045	598.592	1455029	168.017	0
F03	21	11942	4469.44	489.925	121.727	10034385	840.26	0
F03	22	9112	3986.57	508.577	233.888	1815819	199.278	0
F03	23	9276	4548.19	514.305	455.962	1587628	171.154	1
F03	24	11114	3764.84	520.918	1010.92	4937243	444.236	2
F03	25	9387	4568.54	519.293	789.787	1961247	208.932	3
F03	26	9664	4714.72	536.383	594.499	1841540	190.557	0
F03	27	8535	4693.03	537.661	352.474	1730951	202.806	2
F03	28	13078	4330.64	587.328	1505.81	13200880	1009.4	3
F03	29	14832	5963.14	599.581	881.815	14378813	969.445	7
F03	30	12909	2793.26	601.356	1263.41	1759712	136.317	1
F03	32	19477	5576.96	655.062	422.981	14199306	729.029	4
F03	33	12454	5372.14	657.818	611.761	11129480	893.647	2
F03	34	11427	3155.82	649.151	1848.25	1870157	163.661	2
F03	35	9441	4013.35	660.132	1597.75	7217636	764.499	1
F03	36	10448	3837.58	668.947	110.191	1958817	187.482	1
F03	37	15754	5513.09	697.663	1984.63	7796808	494.91	12
F03	38	14118	4722.16	695.766	216.472	14395267	1019.64	2
F03	39	14866	3872.59	695.406	938.678	10585520	712.062	6
F03	40	9929	4708.92	689.101	764.866	2617979	263.67	0
F03	41	12013	4366.33	715.64	1465.02	10015003	833.68	2
F03	42	14843	4588.82	738.383	1666.83	10934224	736.659	9
F03	43	18092	5092.72	802.681	409.134	4940941	273.101	1
F03	44	11703	3152.66	816.811	79.5192	1737709	148.484	0
F03	46	12906	4859.07	886.499	591.748	12567458	973.769	3
F03	47	15985	4460.48	917.588	1648.67	13570494	848.952	5
F03	48	11194	4016.88	914.85	1102.75	1666736	148.895	0
F03	49	9860	4444.28	916.105	1402.08	11593552	1175.82	2
F03	50	10904	4696.61	922.273	873.692	9737146	892.988	5
F03	51	8613	3971.37	968.051	31.9548	1541177	178.936	0
F03	52	13865	5260.79	960.125	385.231	20549309	1482.1	6
F03	53	15736	4431.74	980.476	1853.24	14312058	909.511	3
F03	54	10588	3829.44	1000.41	160.661	2597918	245.364	1
F03	55	10730	5514.1	985.52	538.923	10800058	1006.53	1
F03	56	11645	5866.2	1052.86	639.278	13734522	1179.44	2
F03	57	10104	5241.64	1098.08	479.727	2286133	226.26	0
F03	59	10674	4037.16	1125.34	1486.38	9974889	934.503	3
F03	60	10665	3667.17	1145.46	1942.2	1691998	158.65	1
F03	61	11960	3912.83	1148.46	1789.56	8974149	750.347	5
F03	62	9987	5013.9	1187.4	384.692	1789073	179.14	1
F03	63	10055	5797.96	1200.07	212.793	12967331	1289.64	3
F03	64	13627	4263.77	1224.88	57.8615	2578193	189.197	1
F03	65	11345	5925.79	1266.05	1034.08	16352121	1441.35	2
F03	66	9885	5232.97	1285.46	329.689	1897893	191.997	2
F03	67	19713	4338.48	1332.37	1897.77	11598905	588.389	2
F03	68	11814	4661.2	1343.74	1727.9	12660238	1071.63	1
F03	69	10037	4524.45	1333.53	154.868	7812541	778.374	5
F03	70	9822	5059.31	1467.21	560.296	1501616	152.883	3
F03	71	13706	4620.17	1711.69	62.4867	15563576	1135.53	5
F03	72	8601	6263.99	1708.6	933.124	1702654	197.96	2
F03	74	21386	4325.41	1902.83	228.573	12433848	581.401	3
F03	1	5501	2850.44	23.0767	924.994	853779	155.204	0
F03	3	6344	4012.94	30.966	1389.83	5253212	828.06	3
F03	4	8159	3381.9	30.3481	1661.08	5815768	712.804	2
F03	5	18077	3769.69	127.569	1767.74	13256606	733.341	7
F03	6	12196	4011.44	131.024	1479.6	10023266	821.849	2
F03	8	12704	4293.27	278.415	1799.5	9648144	759.457	3
F03	9	13560	5126.19	305.821	1133.08	15151305	1117.35	5
F03	10	10185	3350.9	340.056	1953.26	1341220	131.686	0
F03	11	11455	3210.04	416.048	1626.31	1707083	149.025	2
F03	12	13395	4586.3	446.551	1433.27	12064285	900.656	5
F03	14	9886	3370.61	454.821	1808.21	1910562	193.259	3
F03	15	10404	3537.18	506.352	547.281	1610202	154.768	1
F03	16	10673	3793.7	537.069	1287.52	1755662	164.496	1
F03	17	10138	3645.49	567.785	722.743	1393714	137.474	0
F03	18	9990	4385.52	696.867	1332.29	7032028	703.907	3
F03	19	27097	5175.39	820.5	488.306	14831118	547.334	0
F03	20	10528	4242.69	771.305	339.52	2269639	215.581	2
F03	21	12874	4356.04	869.872	359.607	12786646	993.215	5
F03	22	10786	3478.38	865.772	176.026	2008523	186.216	1
F03	23	12654	4309.76	949.812	69.5952	11902701	940.628	7
F03	24	9258	4723.95	981.672	601.434	1869543	201.938	0
F03	26	10287	4249.75	1062.23	266.956	2185159	212.419	1
F03	27	12365	5638.99	1089.04	490.359	16869555	1364.3	2
F03	28	17502	4580.57	1149.39	141.757	22356998	1277.4	9
F03	30	7790	4310.9	1217.14	1865.71	1095387	140.615	1
F03	31	7551	4695	1290.48	1719.17	1087245	143.987	1
F03	33	13384	5615.44	1470.5	118.956	18430881	1377.08	6
F03	34	14841	6578.7	1523.45	347.889	2716246	183.023	3
F03	35	7177	4524.7	1615.91	26.7681	5396380	751.899	3
F03	37	9212	5702.66	1699.71	929.922	1358131	147.431	2
F03	38	11265	3390.73	1747.43	125.77	1907103	169.295	1
F03	39	11460	6826.45	1758.63	260.632	14074611	1228.15	2
F03	40	7852	5202.1	1864.24	327.413	1551583	197.604	1
F03	41	8083	4314.68	1916.51	238.494	1281145	158.499	1
F03	42	9246	12046.1	1999.62	1332.21	19076897	2063.26	0
F03	1	8546	2703.31	38.5942	883.898	1649725	193.041	0
F03	2	10420	3648.57	37.7154	1166.79	1491660	143.154	0
F03	3	9213	3374.43	44.4758	1361.17	1356461	147.233	1
F03	4	9626	4021.17	30.1022	1549.49	3606631	374.676	0
F03	5	9592	3922.95	48.6513	1739.86	6283267	655.053	3
F03	7	8554	4456.58	90.5597	2008.83	6904702	807.19	0
F03	8	13948	2354.12	141.726	539.877	1755024	125.826	0
F03	9	11820	3048.05	157.845	1208.58	1570216	132.844	0
F03	10	14596	3631.54	174.898	886.98	13934589	954.685	5
F03	11	13380	2663.06	214.236	1471.65	2143855	160.228	1
F03	12	11941	1952.88	236.287	57.4841	1983953	166.146	1
F03	13	12232	2754.12	248.159	381.803	1816060	148.468	0
F03	14	15978	4062.8	288.17	1879.86	4144809	259.407	3
F03	15	13547	2594.55	289.569	238.473	5458830	402.955	2
F03	16	13402	3831.25	349.014	1770.51	8478527	632.631	10
F03	17	12459	3253.44	362.949	544.185	1719575	138.019	2
F03	18	20943	3116.27	422.716	1636.91	4816586	229.985	1
F03	19	10306	3290.98	372.728	1121.29	1324879	128.554	2
F03	20	13424	2885.26	388.259	377.333	1882702	140.249	3
F03	21	10528	2319.97	455.935	63.4773	1317639	125.156	1
F03	22	8283	4821.41	514.316	1162.97	1557014	187.977	3
F03	23	10925	2996.01	587.717	1813.67	1624104	148.659	3
F03	24	11497	2924.12	591.177	151.473	1630878	141.852	0
F03	25	13610	5498.46	626.789	1114.3	16216949	1191.55	4
F03	26	16174	5051.29	675.62	972.09	18910452	1169.19	9
F03	27	13919	3432.88	688.284	499.01	12532696	900.402	1
F03	28	8789	3043.07	749.75	2011.96	1462883	166.445	2
F03	29	10173	4224.93	754.103	1393.57	5617539	552.201	3
F03	31	10617	4531.44	845.516	818.653	2296178	216.274	1
F03	32	15923	5269.88	859.677	688.802	18510889	1162.53	11
F03	33	16662	4322.76	910.929	178.693	19154427	1149.59	7
F03	34	11341	3117.19	935.262	1810.03	1743989	153.777	1
F03	35	11134	3560.24	960.231	1999.99	7066520	634.679	0
F03	36	10427	3467.84	968.95	1910.87	1746612	167.509	1
F03	37	12902	4140.22	1026.43	751.546	2470346	191.47	3
F03	38	12258	3921.06	1041.83	507.529	1999002	163.077	1
F03	39	10108	3449.14	1126.78	1890.57	1418192	140.304	1
F03	40	10615	4771.96	1136.72	593.089	2183264	205.677	3
F03	41	8925	4006.94	1136.09	1600.03	1562552	175.076	2
F03	42	18549	4598.37	1177.81	353.234	22594866	1218.12	5
F03	43	9562	4019.11	1155.26	1738.18	1730175	180.943	2
F03	44	11798	6075.36	1211.24	765.442	17366400	1471.98	3
F03	45	13658	4323.99	1271.99	638.773	2926678	214.283	4
F03	46	11701	3344.25	1265.3	1968.29	1825653	156.025	0
F03	47	11363	3504.39	1279.59	1816.21	1499356	131.951	5
F03	49	10149	4402.17	1345.43	1395.88	2092933	206.221	2
F03	51	11079	4952.71	1522.86	1473.18	12456542	1124.34	3
F03	52	15276	5891.05	1613.62	578.944	17687302	1157.85	6
F03	53	16788	4963.01	1640.32	329.768	18153192	1081.32	3
F03	54	9728	4649.48	1669.97	1292.4	1624523	166.995	5
F03	55	11432	5987.28	1695.47	1460.35	14428031	1262.07	5
F03	56	8605	5393.4	1766.72	1355.29	2477564	287.921	4
F03	57	12958	3747.76	1835.47	338.56	9209985	710.757	3
F03	59	16277	4943.78	1907.17	565.512	17562208	1078.96	4
F03	60	11141	4125.4	1905.37	1110.91	1734369	155.674	1
F03	61	12291	4119.6	1975.85	358.292	4020771	327.131	1
F03	62	10819	4705.02	1975.69	810.973	7840270	724.676	4
F03	63	8375	3231.4	1999.42	53.8419	2985497	356.477	1
F03	64	8825	3590.74	2009.38	215.898	7599385	861.12	1
F03	1	11929	4834.21	69.0233	1920.35	9732119	815.837	2
F03	2	13883	3256.76	141.49	50.5509	9061252	652.687	3
F03	3	13254	4947.34	145.747	881.933	16493698	1244.43	6
F03	4	9122	3472.64	147.322	1998.57	1639813	179.765	0
F03	5	13490	4387.15	169.085	1800.18	10612539	786.697	4
F03	6	6870	4813.39	237.594	1641.73	1206653	175.641	0
F03	7	10901	3234.75	290.932	1916.29	1559624	143.072	0
F03	8	13169	3753.44	429.15	1350.93	11267874	855.636	3
F03	9	9470	3893.12	414.421	1992.35	1292281	136.461	0
F03	11	6912	5443.14	507.775	1080.79	1188429	171.937	0
F03	12	9115	4155.02	543.758	1975.43	1609190	176.543	1
F03	13	9939	4240.3	667.018	782.28	9087269	914.304	2
F03	14	10662	3296.24	680.537	340.058	3202591	300.374	0
F03	15	12091	3390.46	690.382	91.4948	10021841	828.868	1
F03	16	8820	4018.06	676.263	2002.69	2179926	247.157	0
F03	17	17246	3913.87	776.21	1252.62	15371089	891.284	3
F03	19	9239	4141.05	850.39	1996.31	6925704	749.616	4
F03	20	10062	3546.56	869.575	240.412	2000160	198.784	2
F03	21	9544	4011.26	937.461	391.252	1759100	184.315	0
F03	23	14974	4470.61	1016.32	250.637	14499998	968.345	3
F03	25	12199	3681.17	1113.34	86.5968	11288995	925.403	3
F03	26	11723	4423.55	1149.7	291.029	11455754	977.203	2
F03	27	12772	7421.15	1178.08	1068.28	20949932	1640.3	5
F03	28	13107	3175.23	1258.22	226.743	2567733	195.905	0
F03	29	9887	3437.89	1280	51.0071	6611495	668.706	0
F03	30	12299	4116.28	1400.78	1167.71	1712087	139.205	1
F03	31	9221	4642.95	1404.13	1337.13	1440909	156.264	1
F03	32	13386	6089.17	1444.48	346.057	15369833	1148.2	1
F03	33	12525	2899.94	1489.4	76.6011	1733316	138.389	1
F03	34	19270	5006.79	1533.02	1239.78	3581175	185.842	2
F03	35	9691	7156.73	1556.44	369.668	16895015	1743.37	3
F03	36	11315	6710.01	1648.26	287.017	19375202	1712.35	9
F03	37	12003	6016.9	1667.57	188.878	13179892	1098.05	6
F03	38	9000	5437.69	1666.03	604.72	1720088	191.121	1
F03	39	10219	4366.51	1720.16	1883.88	10176418	995.833	1
F03	40	14891	7384.93	1724.51	1102.64	19491555	1308.95	6
F03	41	14509	6707.01	1803.76	555.97	18334001	1263.63	8
F03	1	8413	2823.84	53.046	113.325	1206647	143.426	0
F03	2	13995	2992.91	84.0791	369.681	9720204	694.548	3
F03	3	9522	3144.08	103.399	216.302	1291033	135.584	2
F03	4	9765	3353.64	177.827	126.307	1351197	138.371	1
F03	5	9560	3461.24	261.688	272.752	1350715	141.288	1
F03	6	10227	3353.51	310.317	377.767	1532548	149.853	0
F03	7	9790	3184.85	322.679	109.965	1299452	132.733	2
F03	8	10988	3236.02	316.975	546.109	4624334	420.853	1
F03	9	10224	3393.99	430.741	66.7481	1669107	163.254	1
F03	10	12982	4456.56	453.679	424.502	11407247	878.697	3
F03	11	8402	4326.27	439.346	651.865	1400859	166.729	1
F03	12	17185	4364.48	455.684	252.326	2943991	171.312	3
F03	13	8786	4868.46	555.992	352.073	9706137	1104.73	1
F03	14	10056	4019.19	548.222	513.031	2097527	208.585	0
F03	15	10705	3611.57	547.099	105.948	5041539	470.952	1
F03	16	9368	4488.59	641.565	253.766	2584298	275.864	1
F03	17	15961	4665.31	673.953	65.2568	18133842	1136.13	2
F03	18	11490	4220.84	683.807	418.048	2480711	215.902	2
F03	19	8724	5268.59	730.256	332.274	8161313	935.501	3
F03	20	19281	4841.49	775.256	557.927	3741788	194.066	1
F03	21	9542	3791.84	768.583	1035.71	2018034	211.49	0
F03	22	8640	4696.67	785.553	249.847	1895318	219.366	2
F03	23	10032	4161.65	806.278	796.73	1548726	154.379	0
F03	24	10847	3893.1	889.216	96.4022	10451063	963.498	3
F03	25	10203	4563.28	882.471	320.295	2745696	269.107	3
F03	27	13948	5932.92	982.634	458.776	18009890	1291.22	3
F03	28	12203	4874.66	990.443	279.296	15772908	1292.54	6
F03	29	9824	3683.64	1100.78	1754.84	1752963	178.437	2
F03	30	11643	4617.08	1238.98	518.684	3783061	324.921	4
F03	31	10039	4475.28	1411.11	147.581	9622605	958.522	1
F03	32	13346	5240.45	1769.36	1577.9	14386077	1077.93	4
F03	33	18491	6192.05	1846.52	1454.7	3830514	207.156	3
F03	34	6936	6750.72	1860.26	1334.22	1607905	231.82	1
F03	35	17882	5869.87	1923.77	1221.16	22965537	1284.28	10
F03	37	6861	5616.95	2016.83	1419.13	7489248	1091.57	5
F03	38	7364	6152.47	2019.8	772.434	13319426	1808.72	0
F03	39	6644	4999.1	2023.46	1966.13	7293521	1097.76	1
F03	40	5450	4406.97	2025.72	1073.9	5160551	946.89	1
G03	1	8341	3881.36	336.476	1777.13	1074598	128.833	3
G03	2	8106	3967.71	354.031	1595.48	1023711	126.291	2
G03	3	11902	5543.38	806.358	151.9	13315081	1118.73	6
G03	4	11802	5292.81	889.076	68.2186	11635031	985.852	4
G03	5	7662	5572.06	1067.25	1208.14	6105558	796.862	2
G03	6	9974	4685.75	1143.46	1366.25	1790278	179.494	4
G03	7	9847	3916.03	1176	210.737	2071951	210.414	2
G03	8	13131	7749.23	1222.99	936.504	16317534	1242.67	2
G03	9	12695	3814.85	1236.22	1206.37	2171060	171.017	1
G03	10	11472	4509.34	1292.62	1047.31	2184341	190.406	1
G03	11	10279	5374.27	1307.03	797.505	8562788	833.037	0
G03	12	15547	6856.89	1378.27	565.827	19270069	1239.47	2
G03	13	8670	5126.78	1356.09	1489.09	1321518	152.424	3
G03	14	10929	6578.51	1368.82	416.337	14562052	1332.42	3
G03	15	10483	4473.11	1382.97	1359.29	1522336	145.219	1
G03	16	12788	3814.94	1400.73	1227.4	1729512	135.245	0
G03	17	10877	5122.49	1395.01	716.167	8343201	767.05	1
G03	18	13323	4920.64	1482.66	776.253	12147195	911.746	2
G03	19	23253	5942.62	1550.71	1365.8	11703472	503.31	6
G03	20	12178	5667.78	1520.06	1574.13	11509597	945.114	7
G03	21	12725	3433.49	1538.43	1718.06	2279055	179.101	1
G03	22	12794	4161.78	1547.16	1021.27	4145854	324.047	0
G03	23	12887	7688.25	1550.46	370.362	19973589	1549.9	0
G03	24	12739	5622.62	1552.35	576.338	12603645	989.375	3
G03	25	25794	6207.75	1659.27	1135.25	23536619	912.484	5
G03	26	14763	4302.37	1640.85	1789.32	12629927	855.512	4
G03	27	12802	6382.78	1655.84	462.928	15086255	1178.43	4
G03	28	11163	4675.17	1673.86	670.745	2435575	218.183	1
G03	29	25633	5675.6	1757.59	850.015	33232435	1296.47	3
G03	30	10921	5237.4	1737.35	1284.96	2288925	209.589	1
G03	31	11774	4785.39	1761.29	537.033	11903166	1010.97	1
G03	32	18118	5071.89	1818.85	1552.47	4629896	255.541	0
G03	33	14385	3852.27	1820.41	1396.03	2796352	194.394	1
G03	34	11396	3791.41	1881.11	1709.53	1629487	142.988	4
G03	35	12630	7085.95	1880.06	1261.79	10957136	867.548	5
G03	36	12829	4683.75	1891.67	559.104	16059211	1251.79	2
G03	37	15119	5224.49	1935.3	1019	17108509	1131.59	7
G03	38	13971	4113.9	1937.45	791.896	2642104	189.113	1
G03	39	10879	4319.62	1963.2	1571.46	1943137	178.614	1
G03	40	8946	4920.75	2008.38	1414.58	6901953	771.513	2
G03	41	8412	7667.53	2001.36	1128.57	9578018	1138.61	3
G03	42	7562	4861.18	2014.09	381.194	8338237	1102.65	0
G03	3	22733	5039.77	282.225	1095.47	21035826	925.343	4
G03	5	10017	3969.93	350.193	579.309	2197270	219.354	2
G03	6	10465	3812.55	370.687	935.585	2455996	234.687	1
G03	7	13683	4749.23	388.921	1846.23	2309537	168.789	4
G03	8	13437	4855.43	399.259	1632.3	10915697	812.361	2
G03	10	11621	4325.73	434.314	1209.91	12659823	1089.39	1
G03	11	14574	4835.02	476.241	1539.08	4075434	279.637	3
G03	12	12111	3874.81	474.917	572.796	11837429	977.411	4
G03	13	11416	4804.53	471.244	936.51	13303774	1165.36	1
G03	14	27096	4925.38	536.713	1957.98	12849903	474.236	3
G03	15	15154	4624.77	510.064	1399.09	13439646	886.871	5
G03	16	10646	4392.8	531.429	1073.61	2186540	205.386	1
G03	17	11117	4220.53	557.705	1229.16	2425112	218.144	2
G03	18	9702	4475.19	554.313	899.186	2333177	240.484	0
G03	19	13593	4341.28	604.565	1597.93	11105291	816.986	2
G03	20	10207	4141.5	631.474	1179.21	1535871	150.472	1
G03	21	9134	4715.5	647.239	910.669	1494035	163.569	1
G03	23	12262	3741.56	850.195	1811.15	7772726	633.887	3
G03	24	9023	4139.24	916.263	1689.3	1507841	167.111	1
G03	25	9515	4015.77	967.991	2012.51	7176227	754.201	0
G03	26	9541	4195.66	966.944	1803.85	2131734	223.429	1
G03	27	10523	3925.33	1062.1	1863.85	6517315	619.34	1
G03	28	9331	5179.29	1144.88	609.534	1987127	212.96	1
G03	29	6551	4271.8	1258.54	2027.3	4077594	622.438	0
G03	30	8558	4205.42	1236.26	1919.79	1631542	190.645	0
G03	32	10256	4570.94	1480.41	200.581	10698718	1043.17	3
G03	33	8578	5340.45	1496.79	354.482	1605307	187.142	2
G03	35	10647	5068.45	1545.71	1798.18	11368797	1067.79	3
G03	36	10085	5621.83	1875.31	744.745	12099020	1199.7	3
G03	37	7592	4453.96	2022.99	203.341	8711180	1147.42	1
G03	1	8601	3746.46	81.8993	1297.37	1207964	140.445	1
G03	2	9862	2869.89	96.8447	105.618	1657564	168.076	1
G03	3	15713	3618.64	170.339	192.177	2374472	151.115	1
G03	4	10606	3028.77	165.949	1767.23	1656868	156.22	0
G03	5	6578	3702.31	190.15	28.1279	5391068	819.56	1
G03	6	12203	5423.74	243.106	1429.01	12807480	1049.54	10
G03	7	16250	4296.87	275.072	1840.15	12507264	769.678	2
G03	8	9271	3524.88	300.055	218.998	1684841	181.732	0
G03	9	14275	6367.74	379.66	1985.63	15085321	1056.77	1
G03	10	13368	5318.69	382.855	1556.74	12761176	954.606	8
G03	11	14159	4142.62	386.038	122.574	12071137	852.542	2
G03	12	8901	4123.53	374.529	1700.88	2561320	287.756	3
G03	13	8363	4700.59	425.23	965.55	8699330	1040.22	0
G03	14	9257	4473.87	465.441	1656.81	3736171	403.605	3
G03	15	6645	3587.15	493.276	1996.57	1446652	217.705	2
G03	16	36360	4901.95	615.246	1699.56	28702278	789.392	1
G03	17	9081	4072.26	552.888	1525.17	1586981	174.758	1
G03	19	15751	3769.21	668.418	473.218	2672475	169.67	1
G03	20	9131	3794.49	651.823	1857.88	2413622	264.333	1
G03	21	13515	5236.89	702.238	1934.84	12122443	896.962	1
G03	22	11676	4671.59	762.874	1729.06	10402264	890.91	4
G03	23	15639	3754.19	780.204	66.6987	12968017	829.21	1
G03	24	10428	5257.12	928.561	324.993	13798939	1323.26	4
G03	25	12117	3588.64	952.068	1489.28	10312530	851.079	0
G03	26	5563	3459.65	973.983	20.3849	4347242	781.456	2
G03	27	15451	3967.14	969.25	137.855	15531441	1005.21	5
G03	28	9695	4419.52	990.975	987.337	1369407	141.249	1
G03	29	22154	6824.67	1051.15	471.601	33929376	1531.52	2
G03	30	10376	5681.69	1107.46	326.73	13434122	1294.73	1
G03	31	12740	4589.37	1128.08	194.983	12519990	982.731	5
G03	32	10071	4943.16	1140.94	1098.69	1523457	151.272	1
G03	33	11245	5052.04	1185.89	47.248	10356153	920.956	7
G03	34	9413	4932.89	1191.91	1002.34	1465724	155.713	2
G03	35	13989	6668.72	1252.42	369.13	18730818	1338.97	3
G03	36	9041	5473.39	1275.17	1040.86	1363128	150.772	3
G03	37	9729	5281.18	1303.92	58.2507	9015442	926.657	4
G03	38	9847	4550.2	1339.1	281.684	2131183	216.43	3
G03	39	9094	5649.45	1401.81	840.016	1384837	152.28	0
G03	40	8930	4999.59	1458.68	373.542	1471589	164.792	6
G03	42	9408	4091.87	1595.45	1843.32	5284234	561.675	2
G03	43	8451	6686.96	1845.47	749.47	1575131	186.384	0
G03	44	8805	6437.96	1871.85	996.047	10855363	1232.86	0
G03	2	5651	3485.72	33.4054	1620.97	982589	173.879	0
G03	3	10874	4472.2	45.8223	1937.53	8847861	813.671	3
G03	4	8378	2806.84	50.5851	165.182	1144463	136.603	0
G03	5	11027	3145.61	79.9966	1257.09	2427793	220.168	0
G03	6	10367	3567.34	120.05	1833.88	1928555	186.028	0
G03	7	12873	4594.49	171.434	1492.14	11290483	877.067	1
G03	8	11995	4147.78	201.132	125.264	10587692	882.675	12
G03	9	13100	3316.87	220.287	1689.8	9799593	748.061	1
G03	10	9990	3452.36	215.961	634.934	5849857	585.571	3
G03	11	10909	3950.93	274.013	187.703	8416392	771.509	6
G03	12	13620	4121.44	276.581	1950.03	10426449	765.525	5
G03	13	9533	4249.3	276.522	1510.02	8253239	865.755	0
G03	14	10386	3737.01	394.353	1560.64	2041187	196.533	1
G03	15	13336	4099.31	403.183	1904.96	11417663	856.153	1
G03	16	9778	3808.96	394.226	1408.32	5645242	577.341	1
G03	18	9608	3799.24	487.714	1473.9	1715818	178.582	2
G03	20	14885	3556.7	535.586	1658.48	12449777	836.398	1
G03	23	10874	3850.44	651.117	1736.21	8233846	757.205	5
G03	24	13762	4954.4	672.621	1939.18	13413522	974.678	5
G03	25	25269	4568.11	739.309	1604.77	17795273	704.233	5
G03	26	9984	4096.76	722.831	1297.71	2413068	241.694	1
G03	27	15155	5653.14	779.284	1374.24	18292053	1207	3
G03	28	9980	3489.8	887.481	1736.03	1618245	162.149	1
G03	29	10378	4133.89	893.519	1198.39	1629097	156.976	1
G03	30	23427	5350.86	939.821	1438.79	17894075	763.823	2
G03	31	15879	4733.83	992.257	1601.01	3107926	195.726	10
G03	32	8618	3878.61	980.006	1915.26	3721609	431.841	0
G03	33	10296	4615.5	1059.53	1145.69	2205908	214.249	0
G03	35	16522	5656.41	1126.46	1335.03	19840321	1200.84	4
G03	36	13652	5357.41	1158.46	1776.78	14411869	1055.66	4
G03	37	11389	5695.99	1169.95	1188.09	12703693	1115.44	2
G03	38	10483	4428.45	1204.65	1440.42	7129130	680.066	0
G03	39	11291	4786.5	1215.54	1039.38	2380236	210.808	3
G03	40	10800	3531.65	1264.88	1948.66	1582763	146.552	0
G03	41	11537	3990.92	1309.75	1605.54	10290207	891.931	0
G03	42	14326	7249.56	1398.94	961.608	22959163	1602.62	3
G03	43	9076	4225.19	1398.42	235.767	1625998	179.154	2
G03	44	13991	6038.69	1448.81	1210.28	17853691	1276.08	4
G03	45	6013	3753.59	1441.42	2015.11	874831	145.49	0
G03	46	15297	6659.85	1486.84	1041.5	22999801	1503.55	7
G03	48	11640	3394.84	1524.56	1577.3	1664059	142.96	1
G03	49	10767	5138.97	1551.45	783.764	1919155	178.244	0
G03	50	11042	5581.79	1550.38	924.236	6798649	615.708	2
G03	51	11790	3516.65	1549.2	1974.62	1626508	137.957	0
G03	52	10327	4642.63	1601.64	669.869	1768636	171.263	1
G03	53	12001	3524.02	1637.01	1752.43	2083046	173.573	0
G03	54	10681	3990.19	1647.35	1920.93	2265488	212.104	1
G03	55	16099	4876.34	1686.19	1058.23	22022729	1367.96	3
G03	56	7690	5892.82	1696.53	495.664	1623277	211.089	1
G03	57	15450	4936.57	1728.64	1424.73	16859794	1091.25	6
G03	58	11237	5300.72	1752.87	1881.97	12144570	1080.77	2
G03	59	10607	3988.67	1760.06	1571.3	1661689	156.66	1
G03	60	15677	5842.58	1815.89	1136.35	18623808	1187.97	5
G03	61	15418	5907.87	1832.81	552.319	19500683	1264.8	7
G03	62	15581	5014.86	1902.36	811.082	18441082	1183.56	2
G03	63	11092	3936.92	1876.08	1700.48	1616045	145.695	0
G03	64	14040	5992.2	1947.14	921.752	17546161	1249.73	5
G03	65	8976	3660.4	1976.28	297.97	1251974	139.48	0
G03	4	7960	4141.63	37.9298	1671.99	5853622	735.38	3
G03	5	13093	3560.77	77.416	1559.98	8669021	662.111	5
G03	6	17250	3432.17	125.014	567.499	11408207	661.345	2
G03	7	13905	5347.82	121.169	1052.74	3233536	232.545	2
G03	8	11154	3505.21	101.31	919.112	1627495	145.911	1
G03	9	9913	3432.07	140.757	751.475	1416899	142.933	2
G03	10	10030	3594.65	141.601	1349.88	2405100	239.791	0
G03	11	12971	6618.17	181.465	1209.36	12443577	959.338	1
G03	12	8446	4794.96	209.495	981.603	1319445	156.221	4
G03	13	10592	3448.51	247.534	1488.22	1609728	151.976	0
G03	14	9871	3951.24	241.602	711.184	2177238	220.569	1
G03	15	23444	4735.53	327.311	1338.71	20430744	871.47	0
G03	16	11325	3880.67	278.979	382.947	9593626	847.119	7
G03	17	20454	5949.08	322.034	897.341	12032303	588.262	8
G03	18	13707	5531.96	319.427	640.357	16279052	1187.65	1
G03	19	9182	4547.45	304.622	1088.93	1721889	187.529	1
G03	20	11094	4567.46	385.143	528.062	11122210	1002.54	2
G03	21	12599	4938.03	407.66	1240.3	10990155	872.304	4
G03	22	13966	6053.37	469.819	975.374	3619766	259.184	9
G03	23	13632	4661.57	520.222	1186.53	11840689	868.595	4
G03	24	12796	5318.12	529.78	1507.67	12632643	987.234	4
G03	25	23712	5052.31	548.144	694.414	25321350	1067.87	9
G03	26	11467	3978.21	587.381	1329.01	2276497	198.526	1
G03	27	10172	4372.23	641.844	815.343	2601026	255.704	0
G03	29	14441	3571.05	670.053	1040.2	2558163	177.146	2
G03	30	10734	4620.63	721.054	1367.31	2338064	217.819	0
G03	31	13206	5691.65	798.214	1465.25	11803049	893.764	4
G03	32	14178	3671.02	846.529	1121.91	3031706	213.832	3
G03	33	11374	6194.06	836.799	1347.68	9998835	879.096	0
G03	34	26997	6490.47	911.175	944.835	23146622	857.378	10
G03	35	11514	4879.19	901.974	789.415	11635227	1010.53	1
G03	36	15817	5667.14	986.803	1322.32	14070463	889.578	3
G03	37	13048	2795.41	1009.18	1711.38	1715271	131.459	0
G03	38	9416	3710.7	1022.47	1511.43	1345352	142.879	0
G03	39	8396	5292.75	1101.82	1991.8	8994426	1071.28	1
G03	40	12384	3663.26	1123.75	1247.32	1940599	156.702	0
G03	41	8272	4730.81	1169.93	1841.93	6461801	781.165	1
G03	43	10182	3658.85	1266.16	1395.66	1389644	136.48	0
G03	44	10202	3927.48	1383.38	1290.21	1404078	137.628	1
G03	46	10192	4116.76	1400.9	1770.53	7830993	768.347	2
G03	47	9620	4384.57	1425.94	1557.03	1424216	148.047	0
G03	48	11193	3927.75	1498.97	1651.68	2095566	187.221	2
G03	50	17392	4959.24	1567.49	1396.05	14395529	827.71	3
G03	51	12393	4155.12	1605.63	1242.38	6046291	487.88	0
G03	52	9926	5634.94	1625.32	1022.53	1683354	169.59	1
G03	53	12140	5301.53	1641.84	1639.41	13044742	1074.53	3
G03	54	13074	5165.06	1642.64	1751.55	13538416	1035.52	5
G03	55	16764	5580	1807.66	1295.96	3653147	217.916	6
G03	56	9356	4687.25	1812.04	1738.9	1518524	162.305	0
G03	57	15910	5605.24	1847.53	1527.4	13434784	844.424	5
G03	58	10770	4395.65	1869.17	1849.11	6777838	629.326	2
G03	59	12722	3873.13	1883.65	1147.16	1844790	145.008	2
G03	61	9866	4563	1959.34	1263.62	1403500	142.256	0
G03	62	9870	3730.05	1990.04	1756.51	1362299	138.024	0
G03	1	5976	3710.28	21.635	212.176	5313120	889.076	0
G03	3	8609	4021.43	209.08	950.808	1175949	136.595	3
G03	4	9547	3112.96	351.105	176.587	1269385	132.962	1
G03	5	9066	3941.62	432.839	1360.68	1293506	142.677	0
G03	6	12692	4136.51	470.365	1778.14	8772012	691.145	2
G03	8	12817	5160.72	590.905	1683.54	9631917	751.495	5
G03	9	8442	4127.84	622.066	1999.79	1552089	183.853	0
G03	10	12648	5206.68	661.704	1910.66	11928785	943.136	7
G03	11	14084	5555.17	717.731	1639.23	2738636	194.45	5
G03	12	22147	5983.21	760.725	1817.3	24922599	1125.33	1
G03	13	14256	5659.82	921.319	1761.24	3057545	214.474	4
G03	14	17119	4808.02	953.83	1958.76	20392894	1191.24	10
G03	16	9345	4464.53	1073.54	1884.15	2093858	224.062	1
G03	18	6501	5553.53	1237.45	2020.98	5222852	803.392	0
G03	19	8332	4376.91	1227.89	45.1416	9216761	1106.19	1
G03	20	12729	5420.46	1221.94	1918.54	10182750	799.965	3
G03	21	14303	6978.7	1243.07	409.769	2847538	199.087	4
G03	22	10598	4121.16	1404.69	1967.05	2003622	189.057	1
G03	24	10933	4885.36	1594.15	306.48	14024855	1282.8	0
G03	25	5187	1616.31	1724.68	364.505	784640	151.27	0
G03	26	7613	5559.91	1738.41	224.151	1687914	221.715	1
G03	27	12437	4692.41	1843.81	82.4368	10072840	809.909	4
G03	1	8481	3569.78	52.5912	353.441	1515733	178.721	0
G03	2	9776	4280.39	94.7447	1144.71	7036676	719.791	2
G03	3	11603	3424.45	146.601	299.65	8876041	764.978	3
G03	4	11249	6082.1	170.492	1001.92	10713852	952.427	4
G03	5	11111	6518.67	197.009	1111.51	12562778	1130.66	5
G03	6	12378	3018.96	272.048	767.428	8403490	678.905	0
G03	7	9622	5782.22	297.442	1013.19	9970179	1036.19	1
G03	8	12609	4592.69	302.481	411.189	1991890	157.974	3
G03	9	19895	5807.13	354.098	1131.5	25955421	1304.62	4
G03	10	14366	3433.9	383.107	687.78	12290840	855.551	2
G03	11	9039	4936.95	381.464	952.288	7360771	814.335	0
G03	12	10552	3612.58	447.652	168.679	8736171	827.916	0
G03	13	10857	5035.14	474.998	422.7	10511144	968.144	1
G03	14	8501	4948.79	482.94	669.682	2807238	330.224	1
G03	15	15153	5970.33	526.316	1070.32	3474244	229.278	1
G03	17	8506	6410.52	537.247	958.852	1824102	214.449	1
G03	18	9885	5274.83	552.576	790.684	12046931	1218.71	1
G03	19	9782	4850.46	581.522	326.672	9860029	1007.98	1
G03	20	9942	5046.72	622.559	516.909	9541244	959.691	0
G03	21	10148	4175.28	663.876	407.319	2445310	240.965	1
G03	22	17252	7162.95	701.009	714.425	3605524	208.992	6
G03	23	7745	3705.03	682.566	46.7921	1162588	150.108	0
G03	24	11891	5578.04	722.139	850.658	3330159	280.057	0
G03	25	9517	6296.18	729.935	947.575	11337660	1191.31	1
G03	26	14647	4646.48	760.259	1092.88	2855745	194.971	3
G03	27	14735	4664.27	793.648	277.364	13501634	916.297	2
G03	28	14405	5066.89	792.859	1337.19	1959439	136.025	6
G03	29	15461	4868.14	859.015	165.245	20047107	1296.62	2
G03	30	8970	6488.54	829.022	715.633	2400206	267.581	2
G03	33	12576	6574.39	914.682	769.235	14654791	1165.3	0
G03	34	10026	4993.49	901.537	1643.2	11019927	1099.13	2
G03	35	15083	6391.43	940.024	553.463	17575930	1165.28	10
G03	36	14896	4818.47	1001.5	299.888	12850549	862.685	6
G03	37	12144	4296.47	1010.53	1287.13	6399636	526.979	3
G03	38	16288	3685.53	1036.88	1021.01	4340498	266.484	0
G03	39	9176	3555.14	1020.88	1991.42	1270260	138.433	0
G03	40	10907	6601.9	1034.25	673.134	12417356	1138.48	4
G03	41	12216	4318.18	1080.9	463.349	2732658	223.695	2
G03	42	13817	2946.75	1080.26	1730.56	2500432	180.968	0
G03	43	10569	5262.75	1105.46	805.881	2649125	250.65	0
G03	44	19506	4228.3	1128.62	105.744	13646490	699.605	1
G03	45	19303	4486.31	1150.86	1384.36	3483589	180.469	4
G03	46	11914	4011.09	1165.3	1819.05	11364416	953.871	3
G03	47	9390	3724.08	1183.73	1966.85	1448169	154.225	1
G03	48	12056	5301.24	1214.78	798.695	13560163	1124.76	5
G03	49	7590	4853.69	1247.71	30.0397	7194073	947.836	0
G03	50	14576	6789.46	1234.69	474.933	20274832	1390.97	9
G03	51	16320	4981.24	1288.59	1384.72	14126660	865.604	7
G03	52	12174	3775.92	1290.03	226.565	2624135	215.552	1
G03	53	14038	5010.68	1339.73	1627.38	12173334	867.17	4
G03	54	10855	7349.32	1336.2	430.646	14125321	1301.27	8
G03	55	14578	7169.1	1372.69	726.661	17443958	1196.59	6
G03	56	10626	4609.3	1396.7	1245.9	1722929	162.143	1
G03	57	7973	6320.84	1389.91	365.877	7548599	946.77	7
G03	58	13252	3923.56	1403.25	126.083	13506501	1019.2	1
G03	59	10578	6994.12	1414.24	593.721	13867814	1311.01	2
G03	60	8534	5555.1	1434.56	1542.62	1742435	204.176	1
G03	61	9845	5296.57	1464.34	278.804	4440138	451.004	1
G03	62	8630	4904.36	1495.98	1631.16	1904397	220.672	0
G03	63	11799	7866.56	1522.73	393.144	15454915	1309.85	4
G03	64	7015	3780.99	1525.89	35.751	2010769	286.638	1
G03	65	24056	4107.19	1541.36	1444.67	3592468	149.338	3
G03	66	12201	5568.41	1545.25	550.557	15471667	1268.07	2
G03	67	11009	3805.57	1551.74	146.526	2012063	182.765	1
G03	68	12337	4025.77	1560.83	1192.98	2854835	231.404	1
G03	69	10745	4950.09	1588.9	684.678	2464089	229.324	4
G03	70	15096	6861.74	1651.95	315.161	27570772	1826.36	2
G03	71	14132	5270.17	1768.72	1616.54	13812456	977.389	4
G03	72	8778	5567.81	1745.44	633.875	2146010	244.476	2
G03	73	13056	7599.73	1800.07	720.054	17467589	1337.9	2
G03	74	15572	6218.02	1889.32	519.08	16689901	1071.79	2
G03	75	7167	4464.63	2003.34	381.253	7070151	986.487	1
G03	1	7210	3230.36	31.0628	945.292	1277516	177.187	0
G03	2	8064	4998.89	58.0372	1928.96	7334069	909.483	2
G03	3	10606	3017.92	109.034	630.071	3331600	314.124	1
G03	4	15041	4364.69	113.548	1659.79	13760253	914.85	3
G03	5	13370	4414.89	205.738	714.161	12814822	958.476	2
G03	6	14125	3770.86	390.26	1820.39	10046403	711.25	4
G03	7	13089	4528.02	394.499	1687.43	11336866	866.137	0
G03	8	12321	3116.4	427.992	1934.57	2243375	182.077	1
G03	9	12894	5271.52	427.533	1547.77	13259893	1028.38	3
G03	10	10965	3877.96	522.169	1467.25	7271530	663.158	3
G03	11	11858	4131.22	567.196	1586.94	10585994	892.73	0
G03	12	19421	4225.09	605.975	1743.31	21664453	1115.52	12
G03	13	11874	4392.17	718.723	1162.09	2477249	208.628	1
G03	14	14114	4759.59	721.873	1645.03	13040552	923.944	2
G03	15	10037	4388.87	728.242	956.585	2008256	200.085	1
G03	16	6880	3302.36	762.06	2020.57	3434525	499.204	0
G03	17	11949	3823.11	760.726	1305.57	1903719	159.32	1
G03	18	12597	4094.23	769.102	206.963	2112253	167.679	2
G03	19	15900	4868.21	799.295	1477.99	14962144	941.015	12
G03	20	11428	3761.31	813.707	753.615	3832058	335.322	1
G03	21	10910	4495.8	818.355	970.596	7529882	690.182	1
G03	23	8959	4883.16	857.468	1170.91	1367819	152.675	1
G03	24	8729	4398.2	872.029	227.165	1589036	182.041	1
G03	25	10294	4038.95	902.801	360.029	1815243	176.34	1
G03	26	12291	4868.35	920.433	1590.83	14897934	1212.1	4
G03	27	14665	4664.34	942.717	1912.77	2363014	161.133	7
G03	28	12500	3188.22	974.988	1691.36	2565280	205.222	3
G03	29	12939	3817.99	999.497	1228.48	2149870	166.154	0
G03	30	9835	3390.1	998.647	80.0967	1821365	185.192	1
G03	31	12605	3421.61	995.974	367.427	2110184	167.408	1
G03	33	11883	3983.68	1065.74	1359.04	2600911	218.877	0
G03	34	11299	4263.27	1071.34	509.669	7585780	671.367	2
G03	35	12777	3745.2	1117.43	1458.4	7861535	615.288	0
G03	36	11767	4010.9	1096.57	913.733	2012447	171.025	1
G03	37	12659	4527.23	1170.16	1257.29	12929104	1021.34	3
G03	39	13652	4988.55	1239.68	928.157	16278290	1192.37	1
G03	40	12119	4073.36	1250.32	1077.28	2484564	205.014	0
G03	41	10999	3982.3	1252.79	1386.21	2194448	199.513	3
G03	42	14432	3381.26	1309.07	1598.22	12249347	848.763	4
G03	43	10252	4871.71	1309.58	828.068	2136746	208.422	1
G03	44	10758	4638.72	1321.68	1243.1	2233328	207.597	0
G03	45	8652	5450.81	1409.74	1071.04	1554904	179.716	1
G03	46	14707	6449.38	1454.34	1230.65	12955585	880.913	3
G03	47	11690	4273.25	1465.84	1378.5	13382061	1144.74	3
G03	48	8882	5288.36	1520.71	1137.31	2071826	233.261	2
G03	49	11799	4633.92	1722.05	1178.37	10568310	895.695	3
G03	50	10430	5127.64	1736.83	1472.33	10314113	988.889	2
G03	51	21419	4361.67	1865.36	1248.94	4282758	199.951	2
G03	52	7364	5050.27	1898.19	134.986	1407766	191.169	1
G03	53	10926	5707.18	1916.84	1421.11	15471918	1416.06	3
G03	54	8683	5603.4	2015.14	987.782	13519894	1557.05	1
G03	55	8189	4644.2	2019.1	1211.54	1649057	201.375	5
G03	2	5825	3221.35	35.9591	1931.23	715611	122.852	1
G03	3	15457	4151.07	118.73	1321.1	10393017	672.383	9
G03	4	13622	2368.44	191.107	1648.6	1678236	123.2	1
G03	5	15627	4496.24	249.745	1397.84	11959795	765.329	4
G03	6	11928	3852.17	284.721	745.113	9675406	811.151	2
G03	7	12328	2841.26	364.043	1140.2	1698633	137.787	0
G03	8	12656	2962.74	353.662	1490.49	2100713	165.986	3
G03	9	10735	3015.05	370.723	1849.03	1578531	147.045	0
G03	10	12016	3113.24	422.341	1246.45	1542886	128.403	0
G03	11	12714	2988.09	421.896	1636.22	6440017	506.53	0
G03	12	14521	4609.88	416.03	613.878	13033991	897.596	3
G03	13	10749	3663.96	458.755	828.843	1655350	154	0
G03	14	23909	3525.95	514.636	1372.31	3511856	146.884	0
G03	15	10955	3762.89	536.207	714.022	2067060	188.686	2
G03	16	14178	4293.84	558.371	1586.24	10075489	710.642	7
G03	17	16279	4638.69	562.623	459.911	16049521	985.903	15
G03	18	11933	4111.32	629.22	615.645	8414292	705.128	1
G03	19	11989	3200.08	641.365	1827.66	7022815	585.772	3
G03	20	10965	3644.91	640.67	1187.91	1494648	136.311	1
G03	21	17647	4803.73	660.307	935.89	6532347	370.168	6
G03	22	15533	4079.18	705.95	779.653	11243032	723.816	8
G03	23	15246	4512.9	710.51	249.102	13533460	887.673	11
G03	24	11640	3358.35	715.979	429.941	2192944	188.397	2
G03	25	16005	4687.63	736.432	1553.67	12048739	752.811	9
G03	26	16889	4166.3	803.184	1315.79	14269435	844.895	2
G03	27	13447	3159.71	826.81	1918.76	7233986	537.963	5
G03	28	12115	5778.38	836.564	945.879	10995661	907.607	2
G03	29	11546	4320.09	848.881	1140.1	6751632	584.759	1
G03	30	11697	4209.49	846.946	607.749	1755970	150.121	3
G03	31	9417	4251.36	863.744	1625.9	1751420	185.985	1
G03	32	8393	4544.37	878.934	1485.04	1367208	162.899	1
G03	33	11283	3306.52	895.724	1743.64	1786073	158.298	1
G03	34	9904	4880.16	903.785	506.067	1694454	171.088	1
G03	35	10680	5212.5	912.691	850.014	3008585	281.703	3
G03	36	10797	4526.73	921.203	395.388	3039287	281.494	0
G03	37	11744	3893.86	931.994	249.117	9187603	782.323	1
G03	38	12766	5076.94	981.01	1253.09	13316016	1043.08	2
G03	39	7864	6603.03	962.666	937.892	1708391	217.242	1
G03	40	10115	5188.64	972.007	1064.79	2980536	294.665	0
G03	41	12187	4474.11	997.711	604.591	2162371	177.433	0
G03	42	7566	4364.98	988.156	2010.15	5475328	723.675	2
G03	43	9589	4183.85	988.915	1609.51	1728973	180.308	1
G03	44	14654	7092.37	1051.85	435.641	20509195	1399.56	12
G03	45	12002	5844.76	1062.34	1168.11	13294472	1107.69	2
G03	46	8715	6616.22	1072.88	913.105	1868927	214.449	0
G03	47	8993	6280.14	1077.66	789.34	3361019	373.737	0
G03	48	15414	4867.89	1093.33	1467.59	2300599	149.254	7
G03	49	7587	5347.51	1088.68	274.19	1535493	202.385	2
G03	50	12967	5603.04	1113.18	1634.49	10784596	831.696	11
G03	51	8219	6106.21	1109.27	999.379	1955717	237.951	2
G03	52	13184	6115.66	1163.72	168.966	2286997	173.468	8
G03	53	14830	6964.02	1188.77	1074.16	2731773	184.206	2
G03	54	15457	6524.25	1197.61	342.878	16105558	1041.96	3
G03	55	8779	7132.85	1171.38	837.191	3547849	404.129	2
G03	56	15375	3648.92	1211.5	1982.57	9741836	633.615	10
G03	57	13735	7398.32	1189.56	506.118	17148099	1248.5	2
G03	58	9535	6649.64	1227	737.907	1782083	186.899	1
G03	59	15065	5872.36	1255.7	1245.81	11875670	788.295	7
G03	60	8652	7277.66	1263.45	652.598	2778247	321.11	1
G03	61	8000	7496.49	1285.58	559.137	2629098	328.637	1
G03	62	13171	3450.35	1296.92	1702.97	1775494	134.803	1
G03	63	24204	6965.53	1369.91	257.556	38068433	1572.82	5
G03	64	13699	6841.29	1329.25	429.888	17075505	1246.48	2
G03	65	10723	5476.74	1335.3	892.635	1750358	163.234	0
G03	66	11216	4517.87	1382.34	1207.93	2202429	196.365	3
G03	67	9341	4962.69	1384.08	1444.65	1387641	148.554	2
G03	68	11404	3749.19	1441.73	1992.96	6743363	591.316	4
G03	69	12685	5085.12	1432.43	570.903	2873850	226.555	3
G03	70	14422	7877.26	1434.49	769.504	2631249	182.447	5
G03	71	8949	4014.39	1448.07	1516.47	1380232	154.233	3
G03	72	11876	5816.06	1498.25	1089.42	13175229	1109.4	2
G03	73	13187	7250.06	1506.96	368.16	19943379	1512.35	10
G03	74	11240	5301.16	1500.42	895.959	1953581	173.806	5
G03	75	9208	4213.41	1620.04	1946.88	1166524	126.686	1
G03	76	12871	6289.05	1651.62	1740.28	1805236	140.256	3
G03	77	11323	5590.28	1747.07	247.617	12624244	1114.92	5
G03	78	12860	3569.23	1930.97	759.67	2011712	156.432	1
G03	2	7955	4290.74	477.888	1966.15	1291178	162.31	5
G03	3	9376	3616.82	560.585	1794.83	1585579	169.11	1
G03	5	11683	4309	596.023	1931.84	7911227	677.157	1
G03	6	10369	5503.84	609.708	844.075	11496292	1108.72	0
G03	7	18226	3965.68	791.942	347.632	3966888	217.65	1
G03	8	12342	3380.29	839.529	1969.6	7432421	602.206	3
G03	9	17372	5445.41	895.804	770.381	15978435	919.781	12
G03	10	12347	6289.36	913.097	458.396	10141512	821.375	3
G03	11	5515	3889.91	1000.85	25.7164	4017906	728.541	1
G03	12	14385	6724.56	1017.12	645.857	21321065	1482.17	1
G03	13	13026	2890.69	1010.89	1886.13	6000952	460.69	1
G03	14	11199	4032.8	1072.16	478.654	1943718	173.562	1
G03	15	10279	4314.95	1097.02	1422.97	5364841	521.922	0
G03	16	10991	3251.61	1143.22	118.668	1735549	157.906	0
G03	17	12927	3495.99	1151.93	1702.76	7657699	592.38	4
G03	18	10668	4014.49	1156.93	1537.28	1753989	164.416	0
G03	19	14362	3726.22	1188.21	520.5	4838996	336.931	0
G03	20	14179	5960.43	1218.33	874.491	16388931	1155.86	3
G03	21	10424	4023.75	1205.88	1309.64	1620764	155.484	1
G03	22	10944	3466.6	1260.67	203.261	1602203	146.4	1
G03	23	14786	5296.22	1245.54	1014.28	17275798	1168.39	3
G03	24	11317	5687.23	1279.24	778.92	13223082	1168.43	6
G03	25	11686	3705.77	1268.84	1575.9	1793664	153.488	1
G03	26	11304	3882.98	1310.61	1386.45	4820500	426.442	2
G03	27	9988	5261.89	1305.29	534.269	1541632	154.348	1
G03	28	15260	4288.24	1342.84	82.9023	9988813	654.575	6
G03	30	10793	3501.01	1381.8	1768.55	1432341	132.71	2
G03	31	14066	6260.11	1390.23	1254.45	14966705	1064.03	3
G03	32	11074	4062.48	1405.97	384.604	1461480	131.974	3
G03	34	10044	3921.33	1453.06	185.564	1536987	153.025	0
G03	35	13539	5037.9	1459.77	1034.32	14788796	1092.31	3
G03	37	14772	3725.49	1532.15	1542.36	12672499	857.873	1
G03	38	13620	3359.45	1588.18	1891.73	7446409	546.726	1
G03	39	14381	4663	1655.39	1104.24	14046914	976.769	2
G03	40	10949	3201.29	1654.85	70.4361	1501196	137.108	3
G03	42	7815	4464.82	1708.45	152.609	1186111	151.774	2
G03	43	21812	4097.56	1784.07	1790.84	3432362	157.361	1
G03	45	10458	4543.34	1900.74	1289.29	1529140	146.217	0
G03	47	13392	4391.58	1972.84	1810.24	11148044	832.441	3
G03	48	9884	4752.22	1967.28	1653.53	1808986	183.022	3
G03	49	8144	6193.12	1999.15	573.592	8271506	1015.66	1
G03	50	6651	4979.35	2012.36	1176.75	898837	135.143	1
G03	2	18425	2907.22	278.836	227.89	11286770	612.579	1
G03	3	13351	5062.69	321.384	522.925	15731622	1178.31	4
G03	4	7508	2819.6	380.891	37.8993	1038774	138.356	1
G03	5	11616	3435.76	425.709	253.853	9963607	857.749	0
G03	7	10371	3656.51	474.139	421.732	6193128	597.158	1
G03	8	11339	2477.41	543.392	49.754	1569234	138.393	2
G03	9	10752	3644.22	579.543	467.233	2464415	229.205	1
G03	10	11321	4520.69	587.606	339.451	11723317	1035.54	2
G03	11	8353	5172.4	605.568	714.786	1186136	142.001	2
G03	12	15193	2969.66	677.711	140.22	10089169	664.067	2
G03	13	9898	3314.57	701.642	1925.48	1247815	126.067	2
G03	14	12736	3405.49	925.908	307.658	2218033	174.155	7
G03	15	11128	6482.57	1004.24	1442.66	13373110	1201.75	4
G03	16	13581	5491.38	1021.3	1560.43	14781163	1088.37	9
G03	17	11114	4003.46	1075.69	422.558	1553349	139.765	2
G03	18	11407	4500.29	1293.52	539.783	1766523	154.863	1
G03	19	8532	5635.91	1290.17	681.508	1230127	144.178	0
G03	20	9729	3318.99	1345.66	50.6308	1950744	200.508	3
G03	21	11317	4540.57	1354.01	445.451	3799187	335.706	0
G03	22	10079	5640.8	1396.69	1714.48	14384740	1427.2	4
G03	23	9346	5968.74	1420.56	730.048	1450256	155.174	3
G03	24	6371	3897.52	1454.34	34.8556	1227304	192.639	2
G03	25	9531	5523.09	1458.51	354.54	6449989	676.738	0
G03	26	10773	3558.61	1476.71	1949.09	3682344	341.812	2
G03	27	9168	6004.81	1507.83	679.453	1597765	174.276	1
G03	28	13554	4839.02	1524.61	124.191	14027500	1034.93	3
G03	29	10687	5123.44	1528.62	599.536	2122375	198.594	0
G03	30	11438	4388.22	1574.45	494.856	7922947	692.686	0
G03	31	5737	1996.1	1565.41	339.969	943068	164.383	0
G03	32	9723	5615.59	1608.76	1156.61	2092082	215.168	2
G03	33	16131	7081.24	1618.48	908.292	21409933	1327.25	15
G03	34	9080	6287.41	1635.64	1052.39	2613336	287.812	4
G03	35	9586	3730.8	1685.47	1786.08	1206495	125.86	0
G03	36	10773	3958.88	1687.33	198.113	1908180	177.126	2
G03	37	16138	3892.15	1719.62	70.6448	2388165	147.984	6
G03	38	9399	6574.93	1741.78	856.813	2508027	266.84	1
G03	39	27307	8365.05	1770.98	1072.44	37398211	1369.55	12
G03	40	10635	4166.93	1763.7	1609.6	1529569	143.824	0
G03	41	9783	5698.58	1782.12	658.349	2454784	250.923	0
G03	42	9643	5908.8	1795.78	752.227	1871598	194.089	1
G03	43	11472	4186.54	1829.6	442.428	2045781	178.328	0
G03	44	10264	5102.21	1877.65	612.806	3348563	326.243	0
G03	45	7780	4708.4	1868.89	1716.95	1005126	129.194	1
G03	46	17875	8655.19	1883.07	902.704	19466517	1089.04	6
G03	47	10150	4410.74	1876.53	1525.44	1531689	150.905	0
[truncated: 2,561 more rows]

## Sheet: 53BP1_ZR_Rep1
ParentWell	CellIndx	NuclearArea	MeanNuclearIntensity	Centroid_1	Centroid_2	IntNuclearIntensity	pRBIntensity	NumPuncta
[truncated: 2,393 more rows]

[truncated: 7 more sheets: 53BP1_ZR_Rep2, RPA_MM_Rep1, RPA_MM_Rep2, RPA_ZD_Rep1, RPA_ZD_Rep2, RPA_ZR_Rep1, RPA_ZR_Rep2]
